# Supplementary material for: Synthesis and Anticancer Activity of A-Ring-Modified Derivatives of Dihydrobetulin
Source: MDPI journal article supplement (doi:10.3390/ijms24129863), 2023-06-07
Supplement: s1 [file s1]

## Synthesis and anticancer activity of A-Ring Modified Derivatives of Dihydrobetulin

Irina Tolmacheva, Yulia Beloglazova, Mikhail Nazarov, Olga Gagarskikh, Victoria Grishko\*

Perm Federal Scientific Centre, Institute of Technical Chemistry UB RAS, Academician Korolev St. 3, 614013 Perm, Russia

\* Correspondence: grishvic@gmail.com

Determination of the relative configuration of C(2), C(24) and C(4) atoms of compounds **9**, **11**, **18** and **19** was carried out using the data of 2D NMR spectra (HMBC, HSQC, NOESY, COZY) of compounds **11** and **19** (Fig. 1, 2). Cross peaks in the HMBC spectra of compound **11** C(1)/H(2), C(1)/H<sub>3</sub>(25), C(2)/H(24), C(3)/H(1), C(3)/H(2), C(3)/H(24), C(4)/H(5), C(4)/H(23), C(4)/H(24), C(24)/H<sub>2</sub>(23) were the most informative. The NOESY correlation between the H(2) and H<sub>3</sub>(25) protons, as well as between the H(5) and H(24) protons showed that the product is the 2 $\alpha$ -cyano-24 $\beta$ -hydroxy derivative **11** (Figure S1).

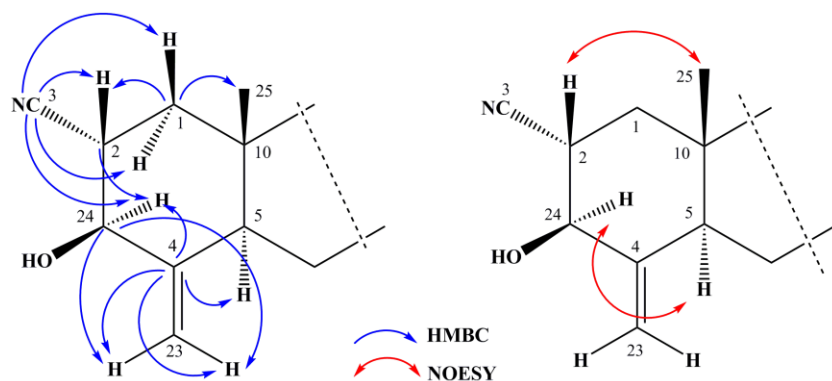

**Figure S1.** Key HMBC and NOESY correlations for compound **11**.

NOESY correlations of compound **19** H(2)/H<sub>3</sub>(25) and H(4)/H(5) showed that the product is 2 $\alpha$ -cyano-4 $\beta$ -hydroxy derivative **19** (Figure S2).

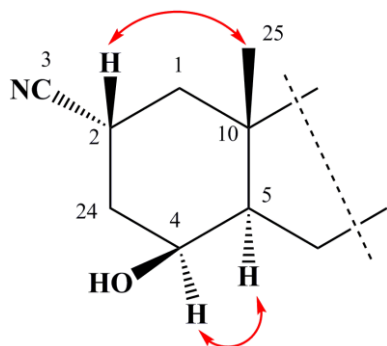

**Figure S2.** Key NOESY correlations for compound **19**.

1.  $^1\text{H}$ ,  $^{13}\text{C}$  NMR spectra.

$^1\text{H}$  NMR spectra of 28-Benzoyloxy-2-cyano-3,4-seco-3-norlup-4(23)-en-24-al (4).

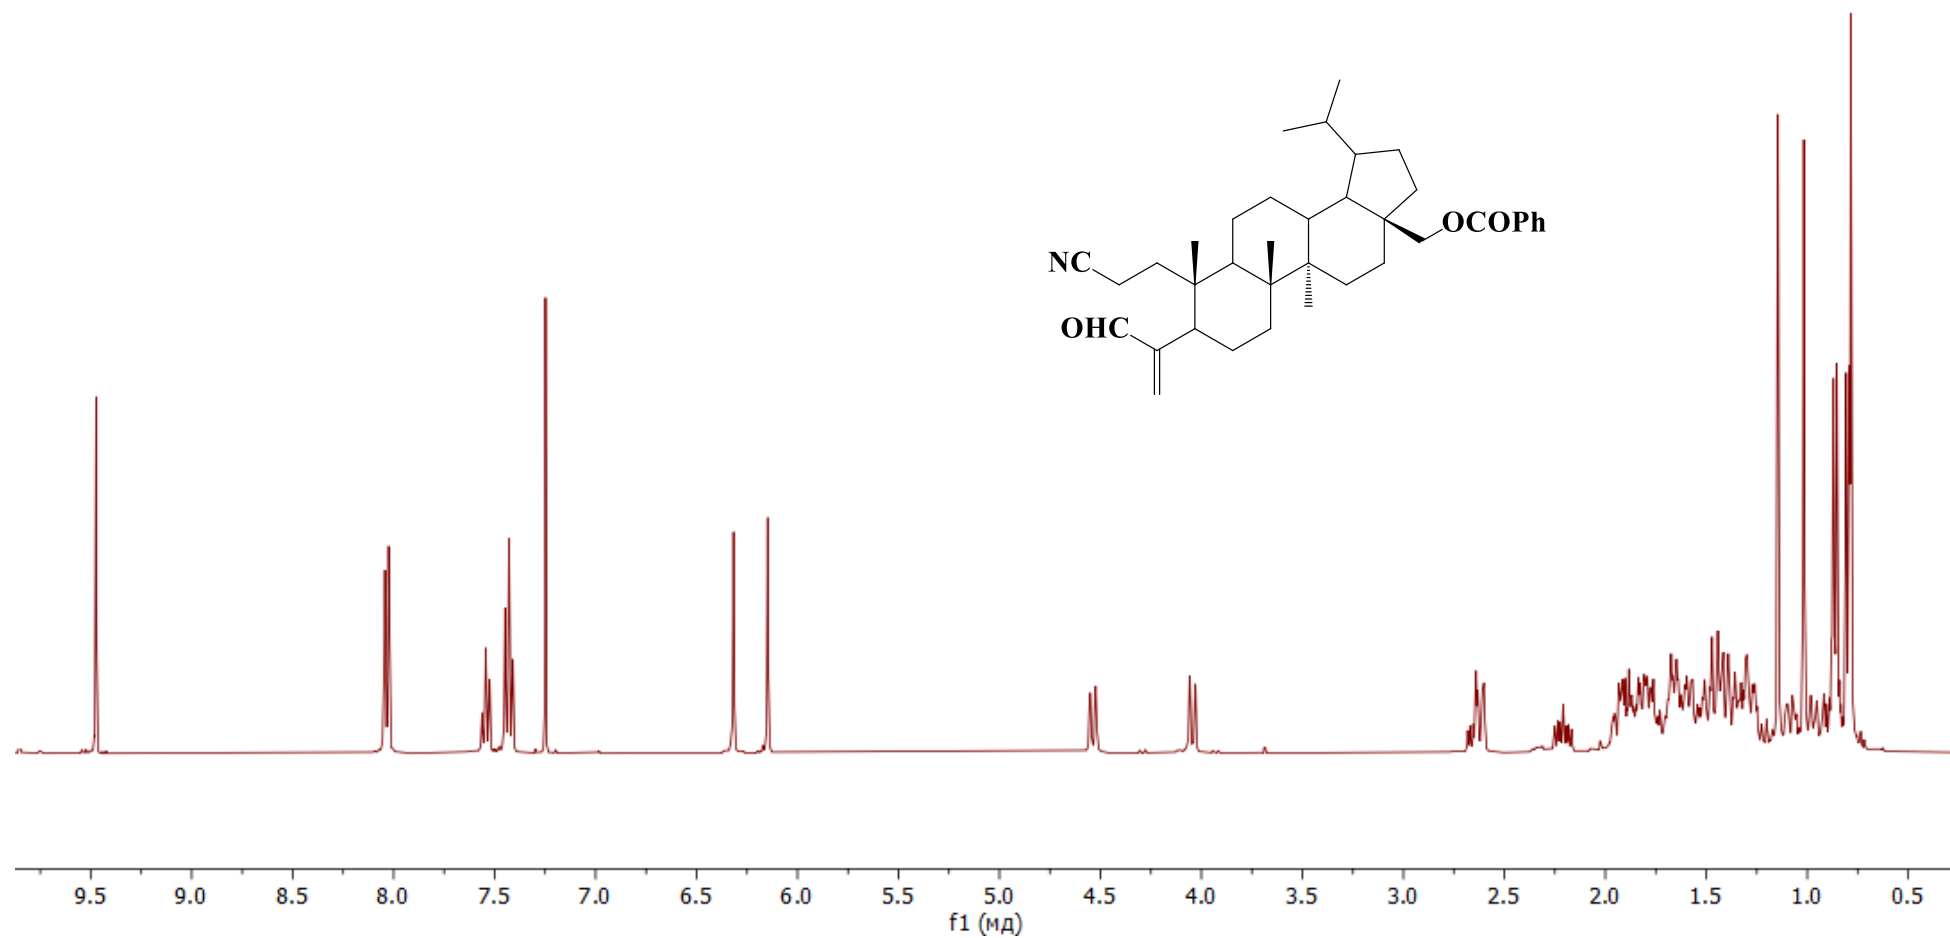

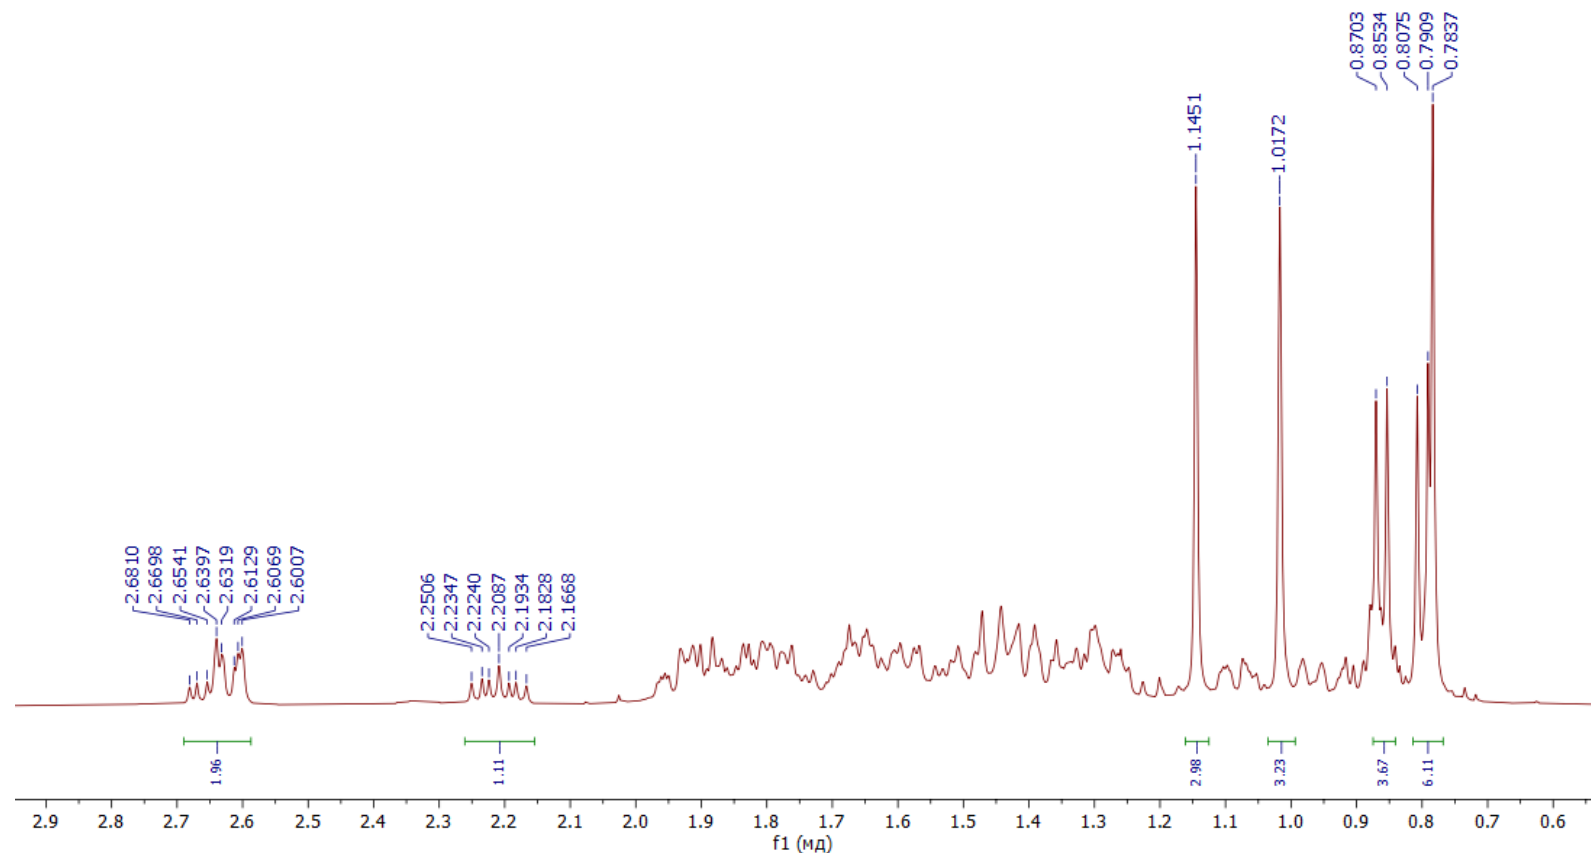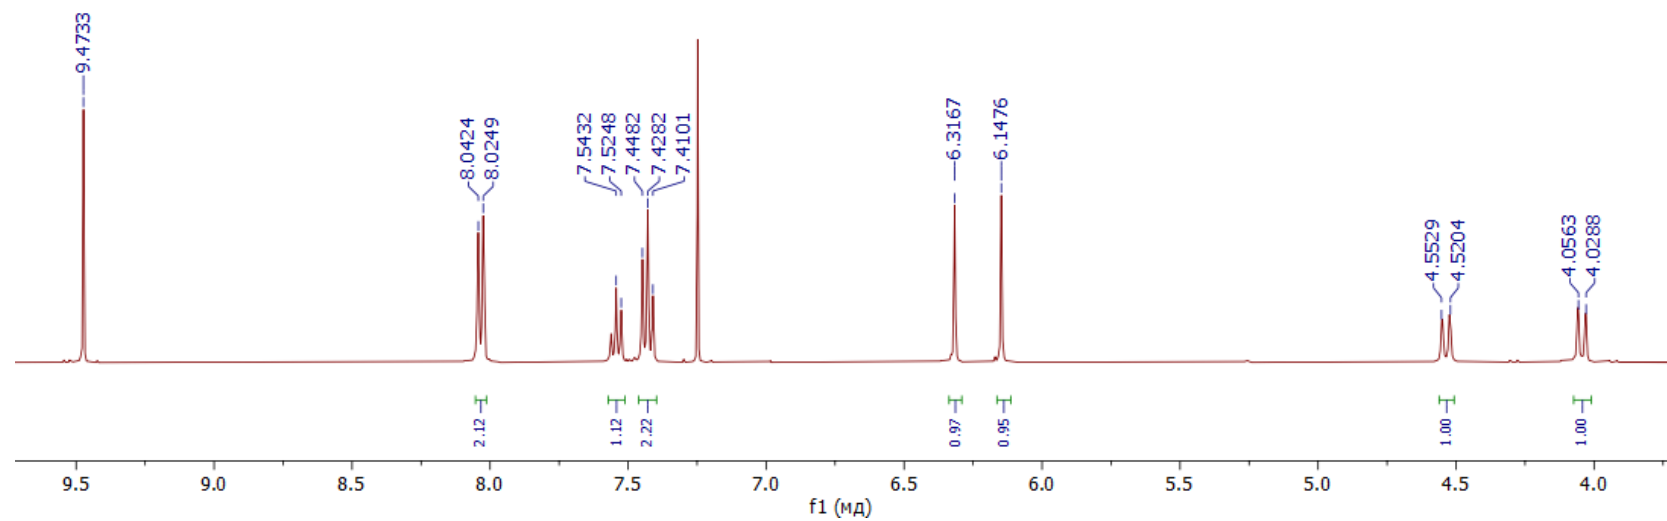

<sup>13</sup>C NMR spectra of 28-Benzoyloxy-2-cyano-3,4-seco-3-norlup-4(23)-en-24-al (4).

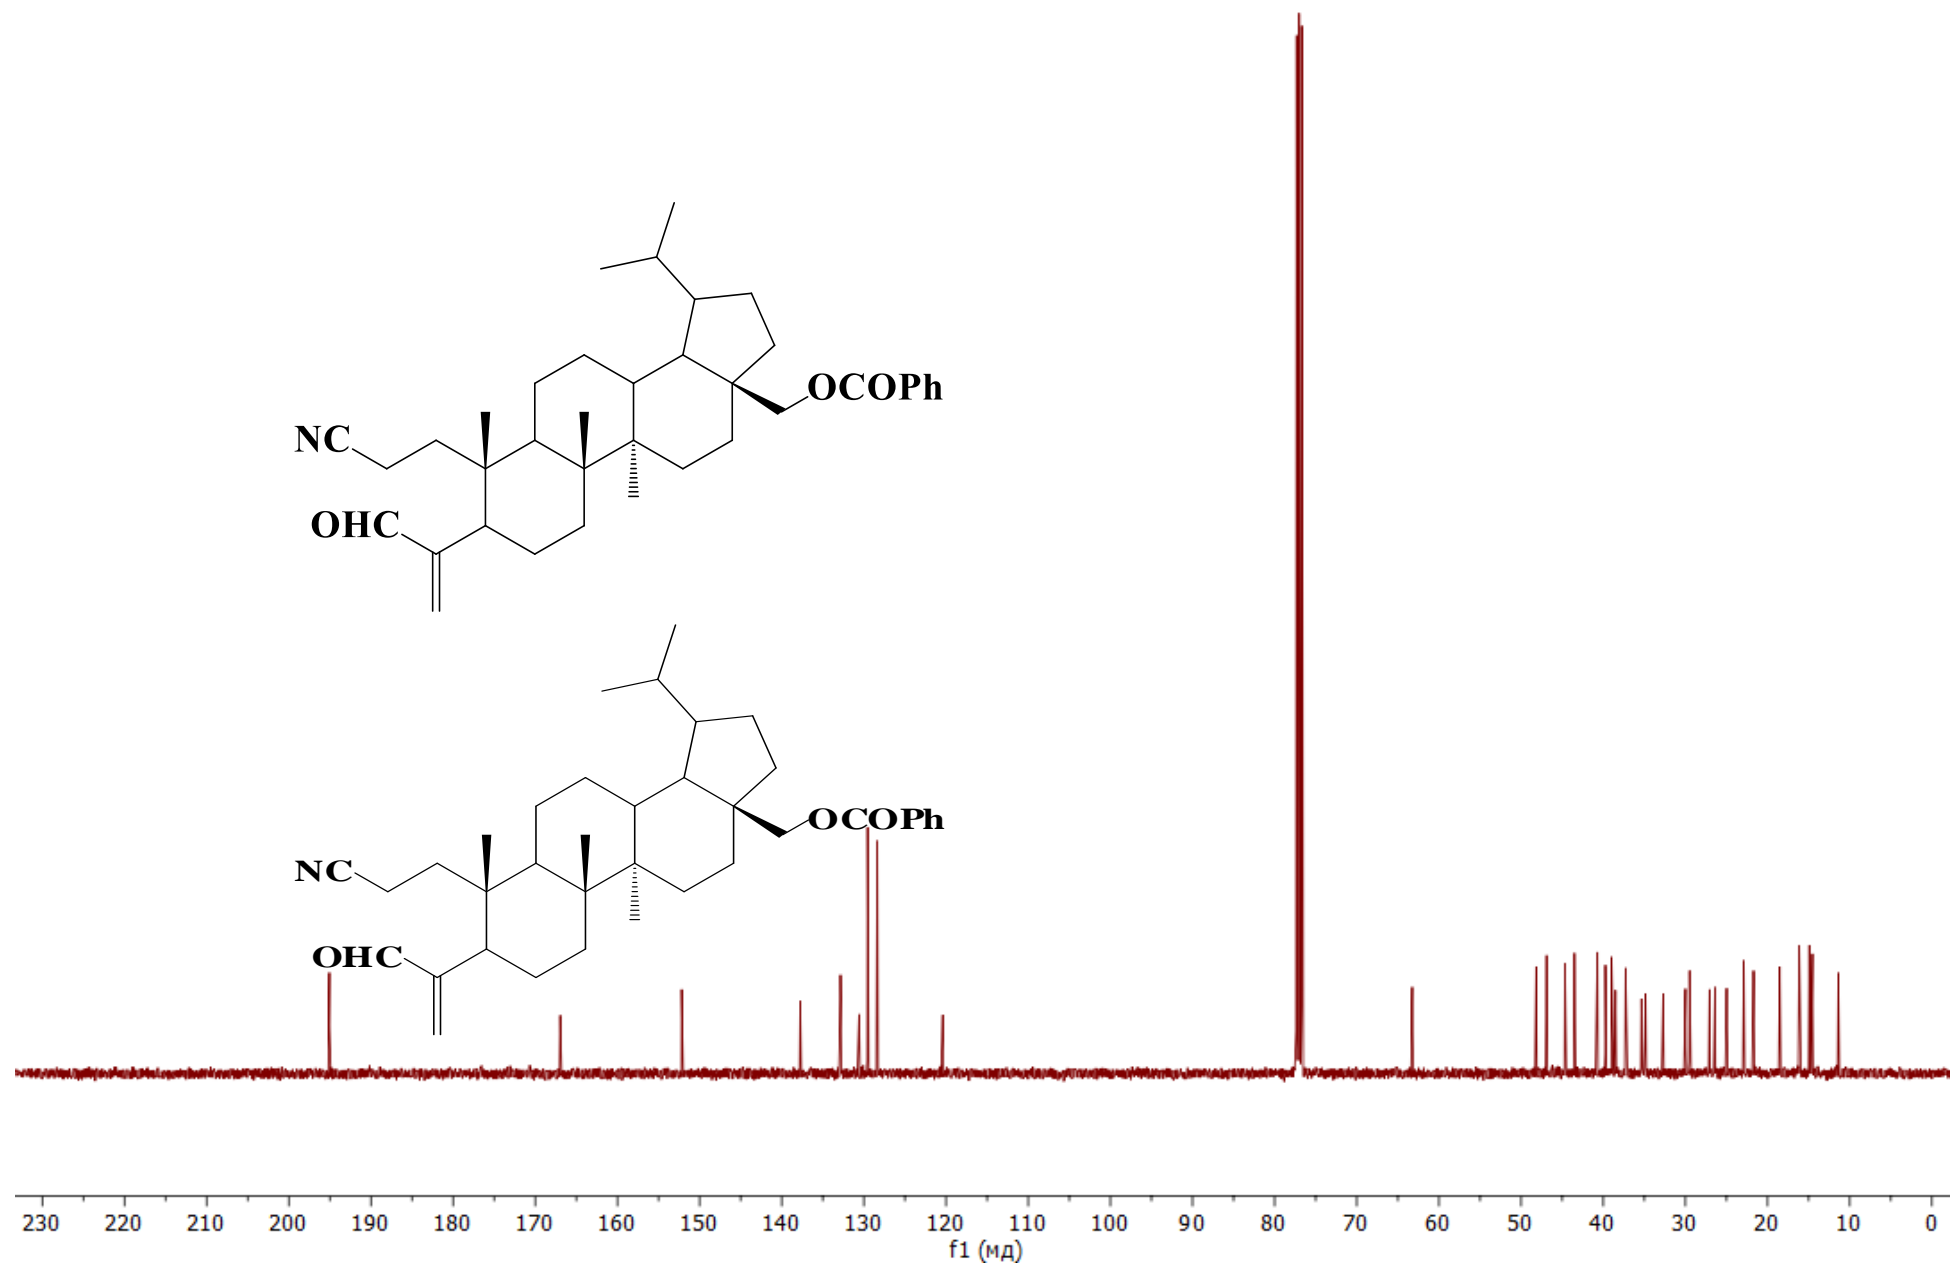

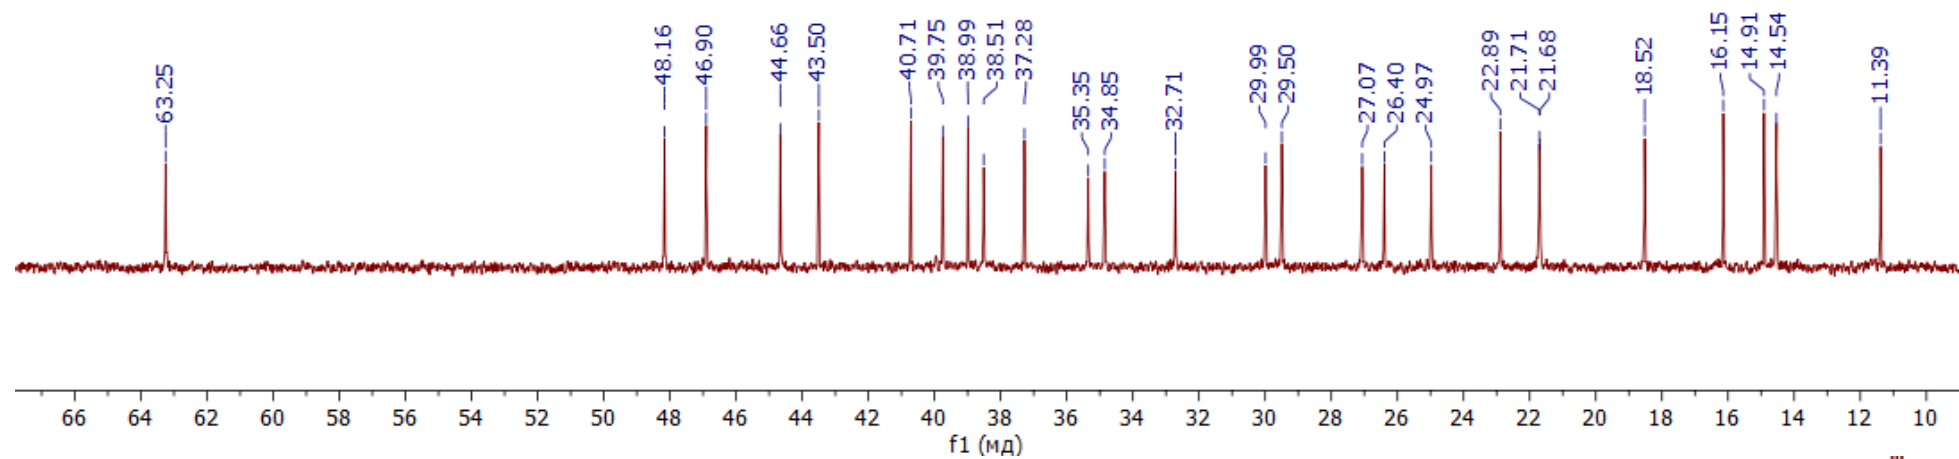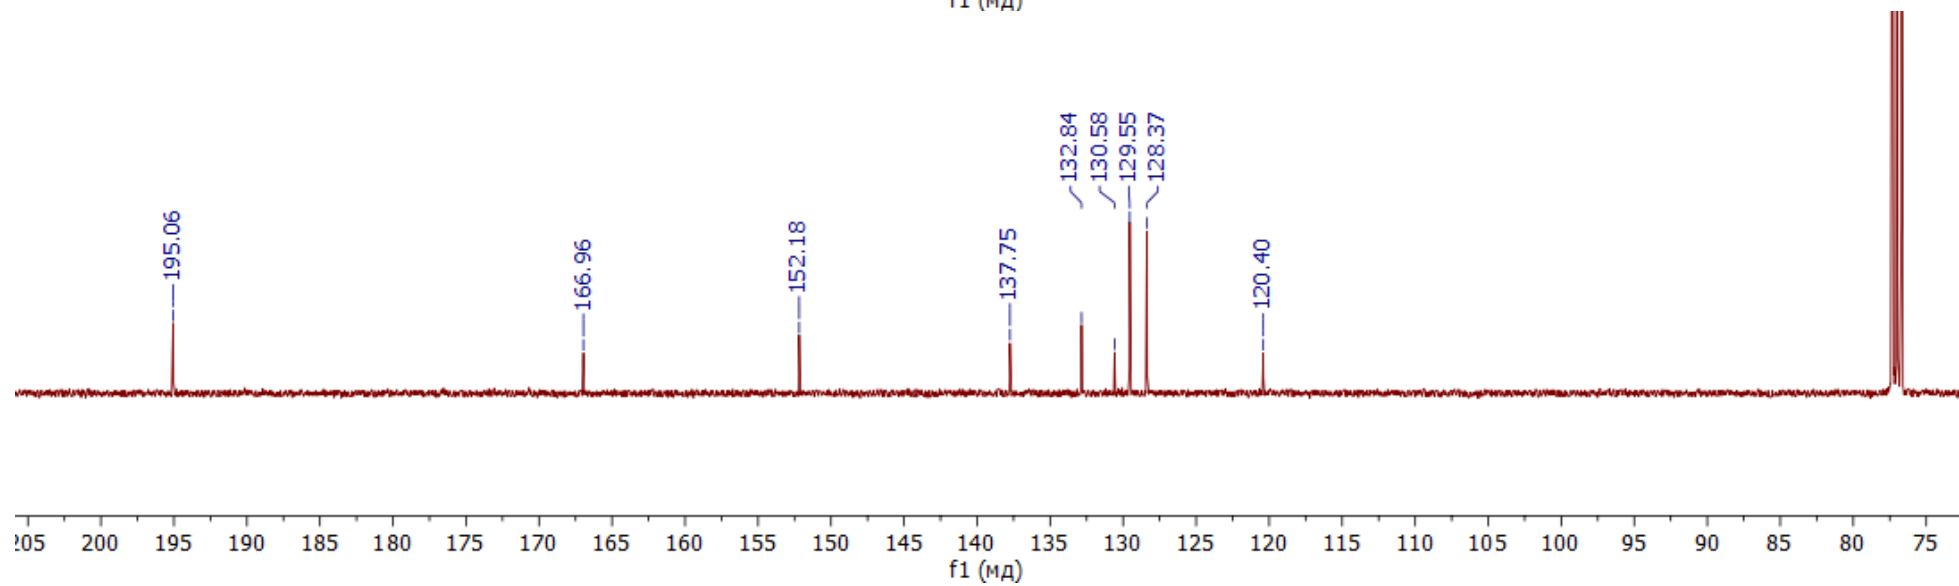

$^1\text{H}$  NMR spectra of 2-Cyano-3,4-seco-3-norlup-4(23)-en-24-al-28-oic acid methyl ester (5).

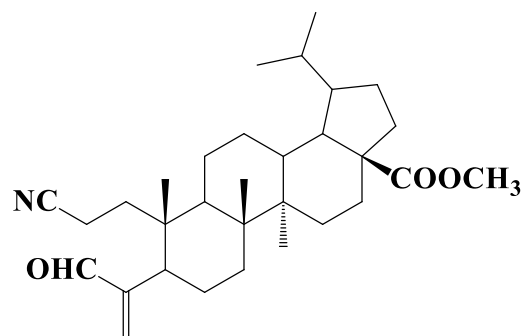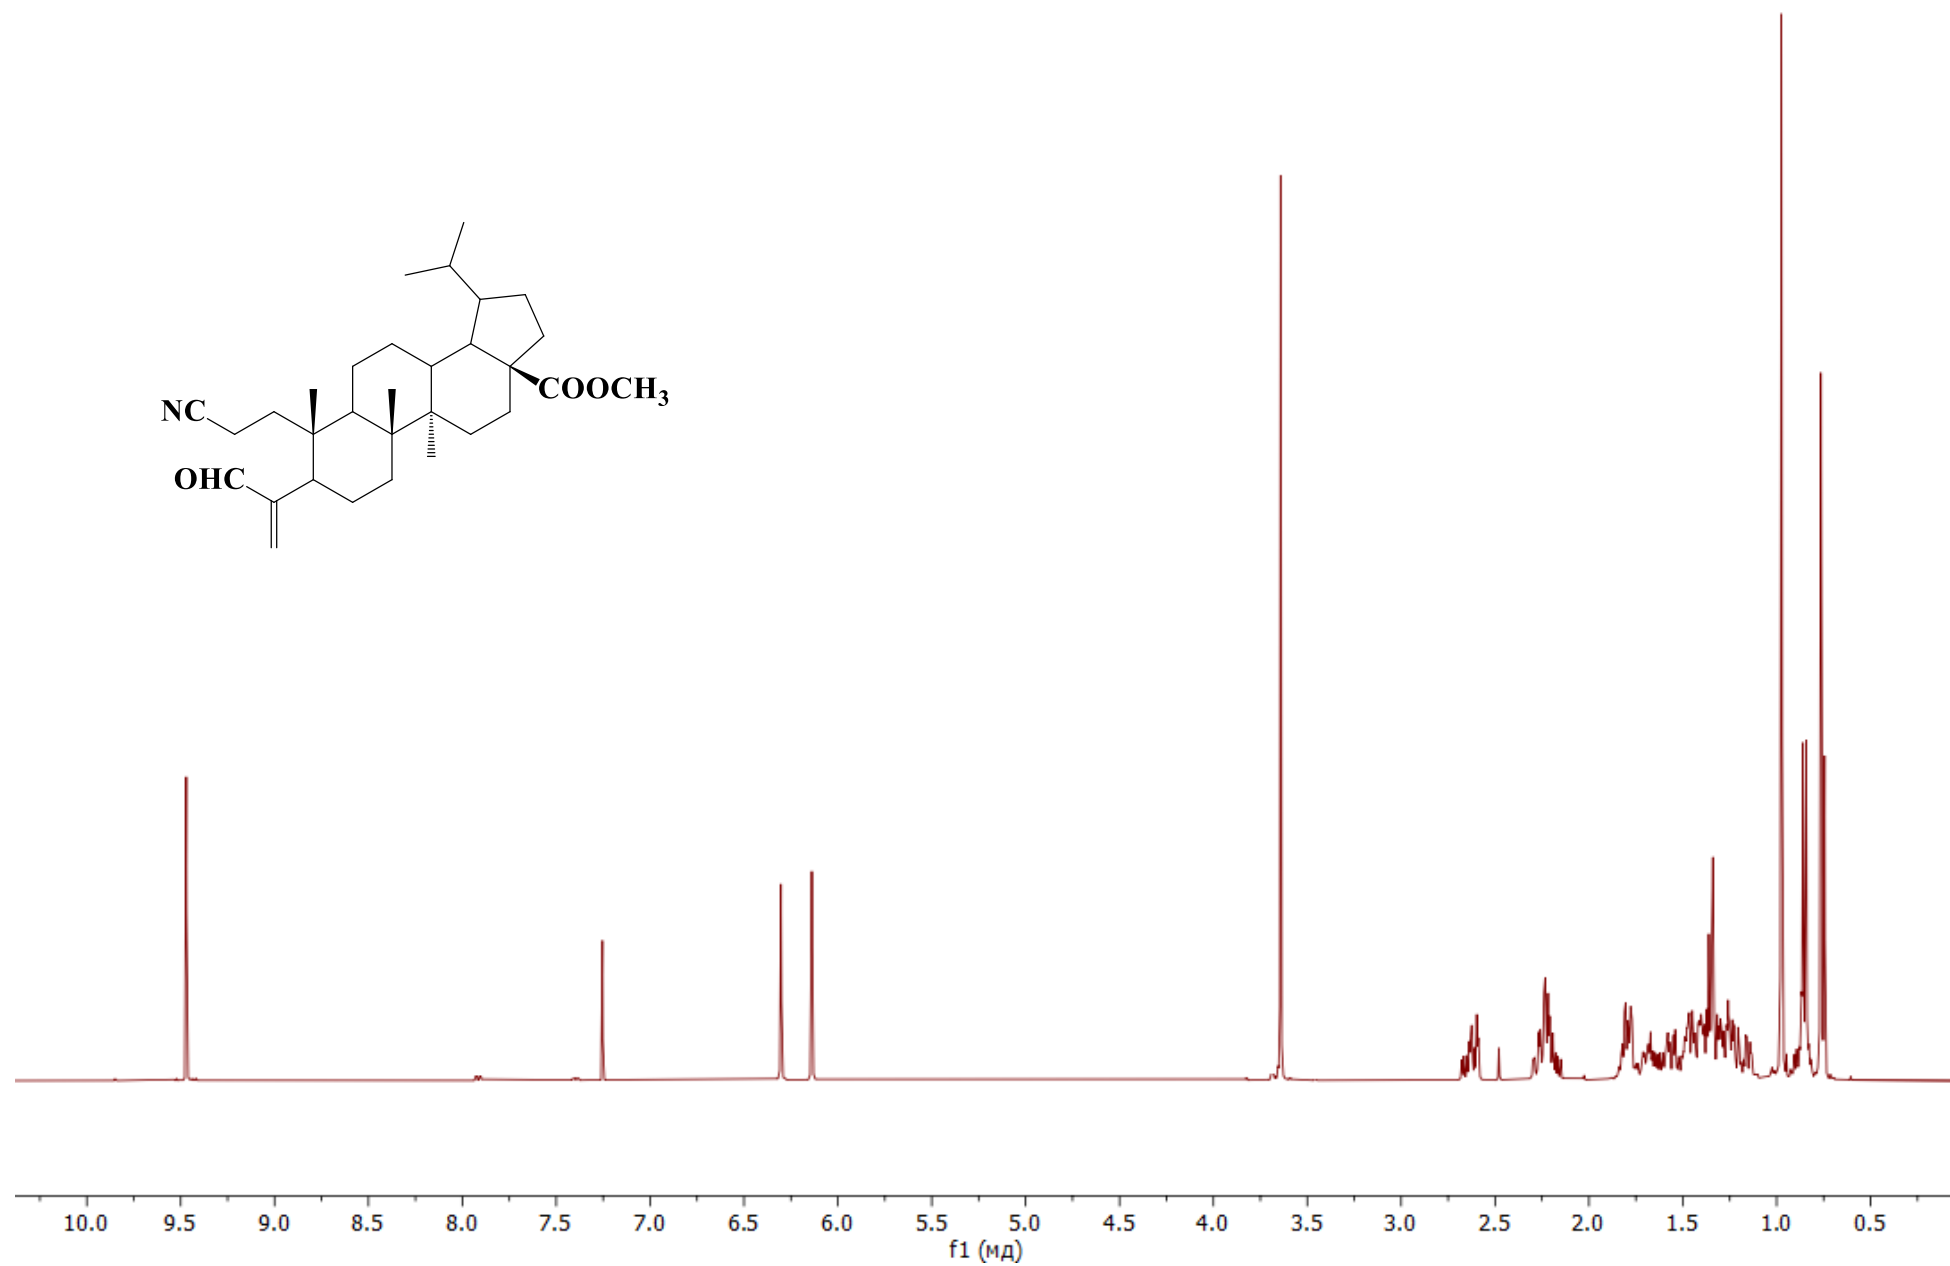

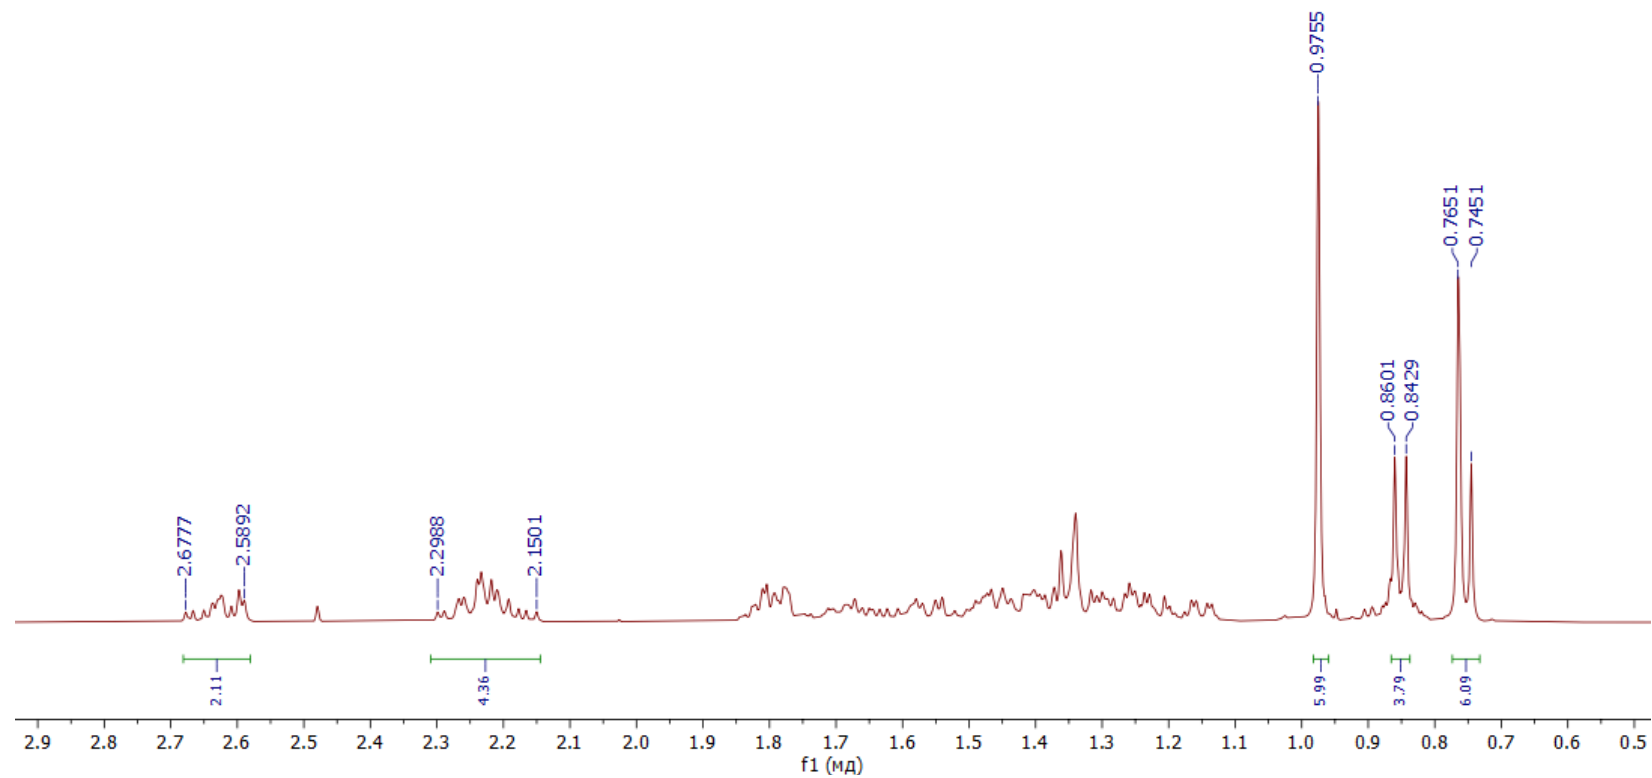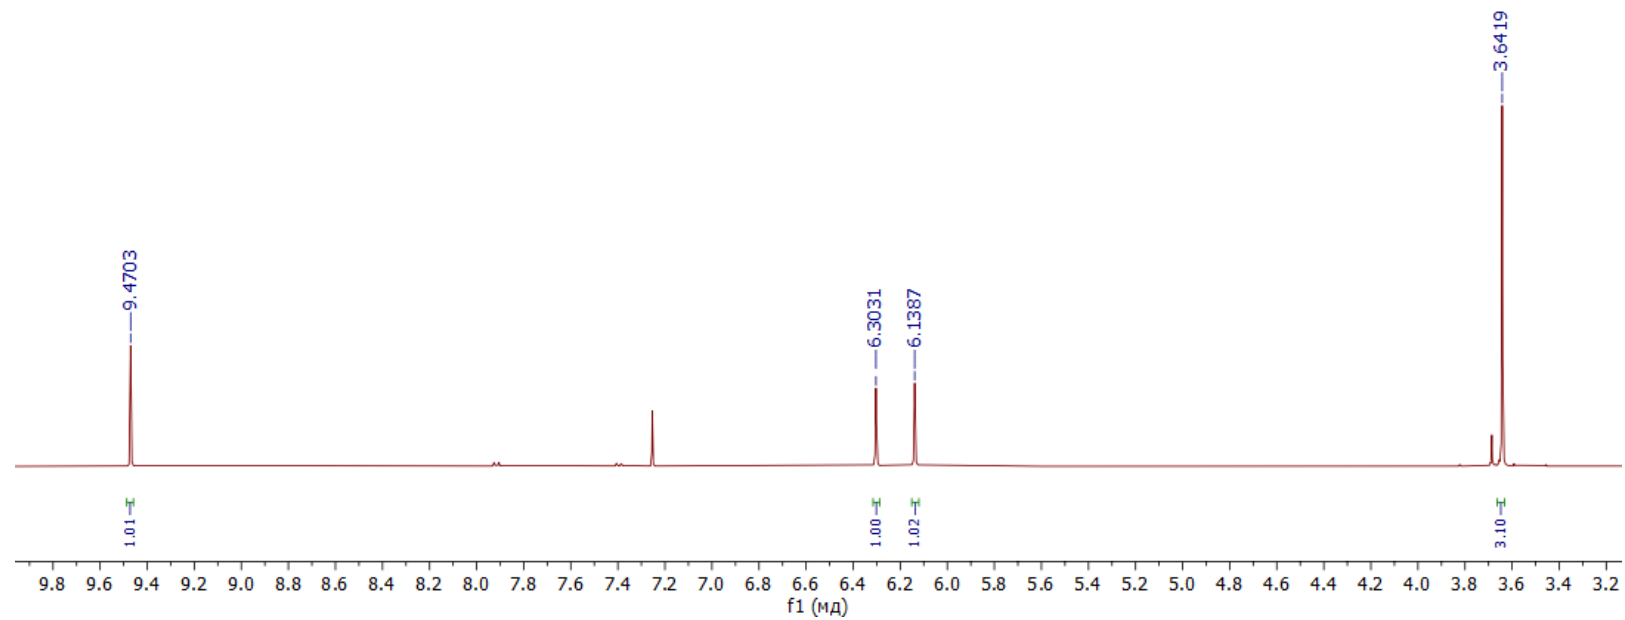

<sup>13</sup>C NMR spectra of 2-Cyano-3,4-seco-3-norlup-4(23)-en-24-al-28-oic acid methyl ester (5).

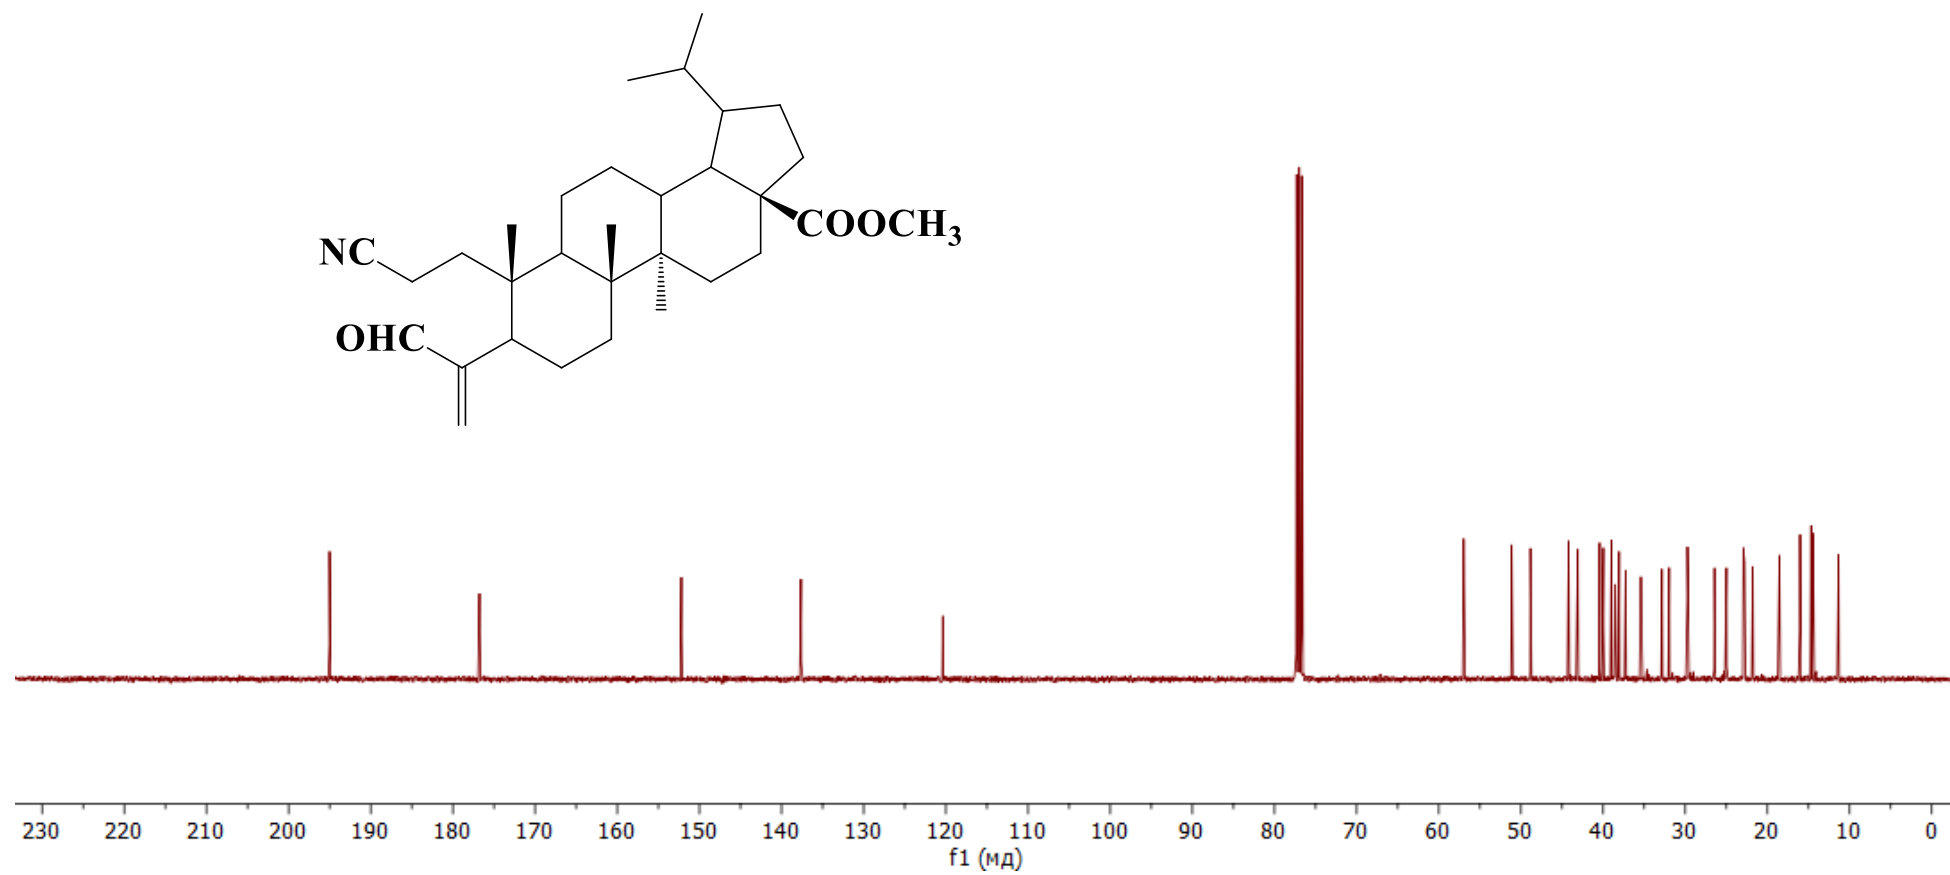



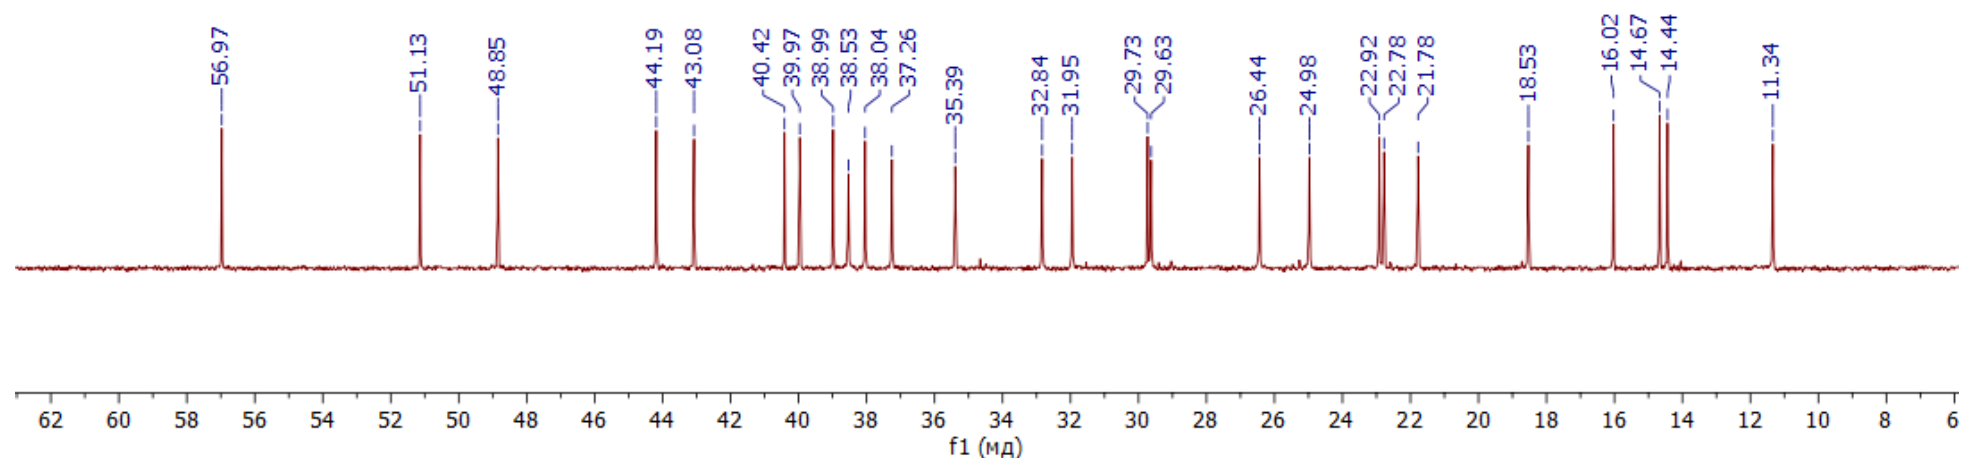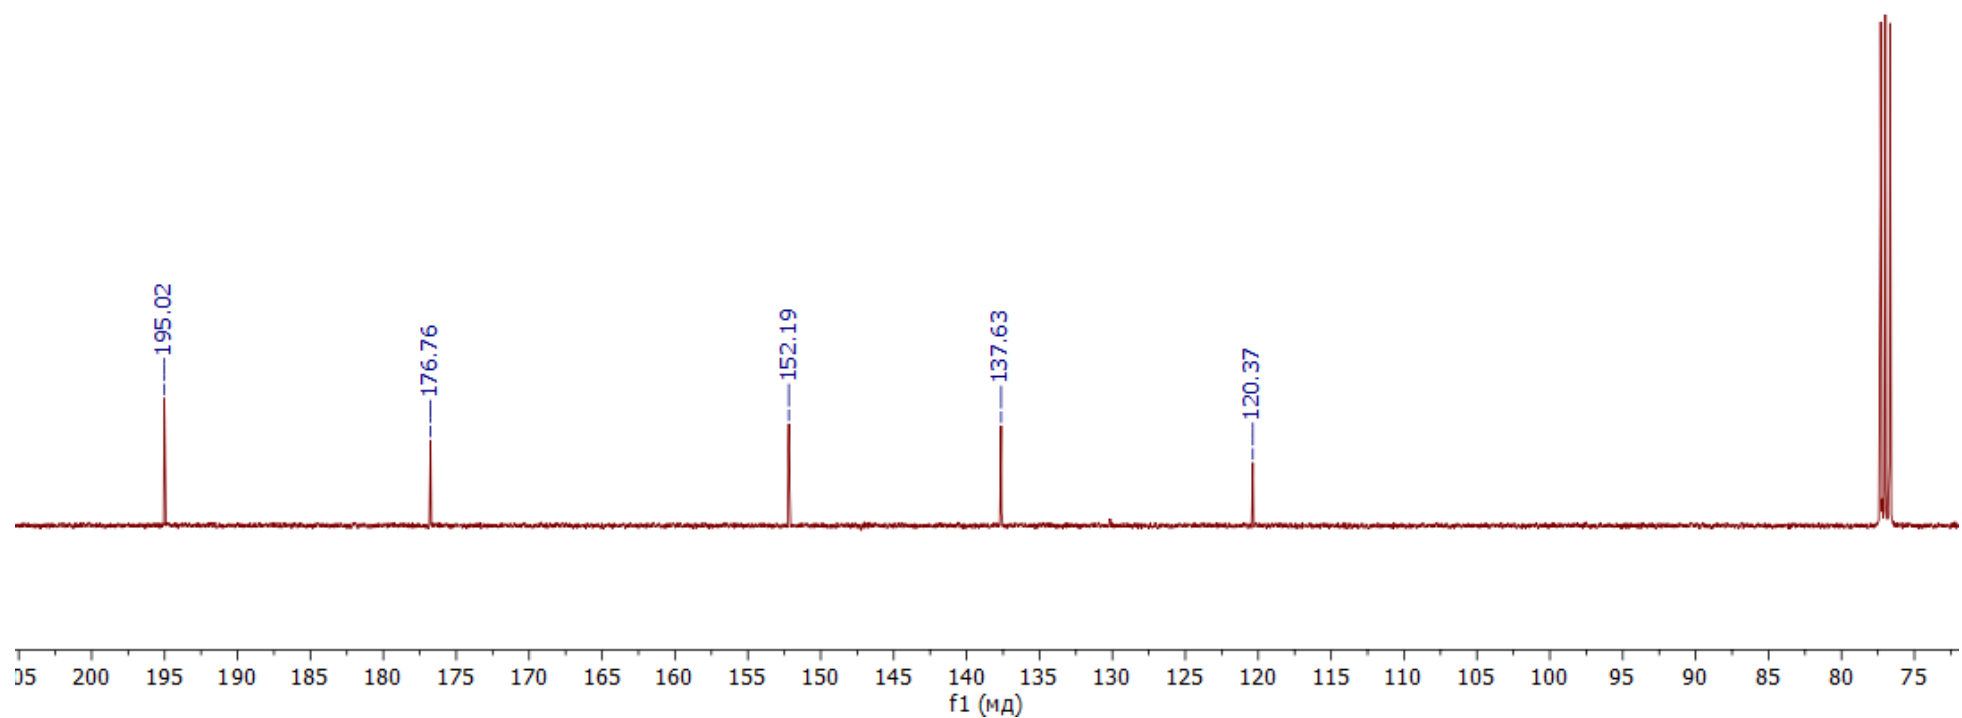

$^1\text{H}$  NMR spectra of 28-Benzoxo-24-bromo-2-cyano-3,4-seco-3-norlup-4(23)-ene (6).

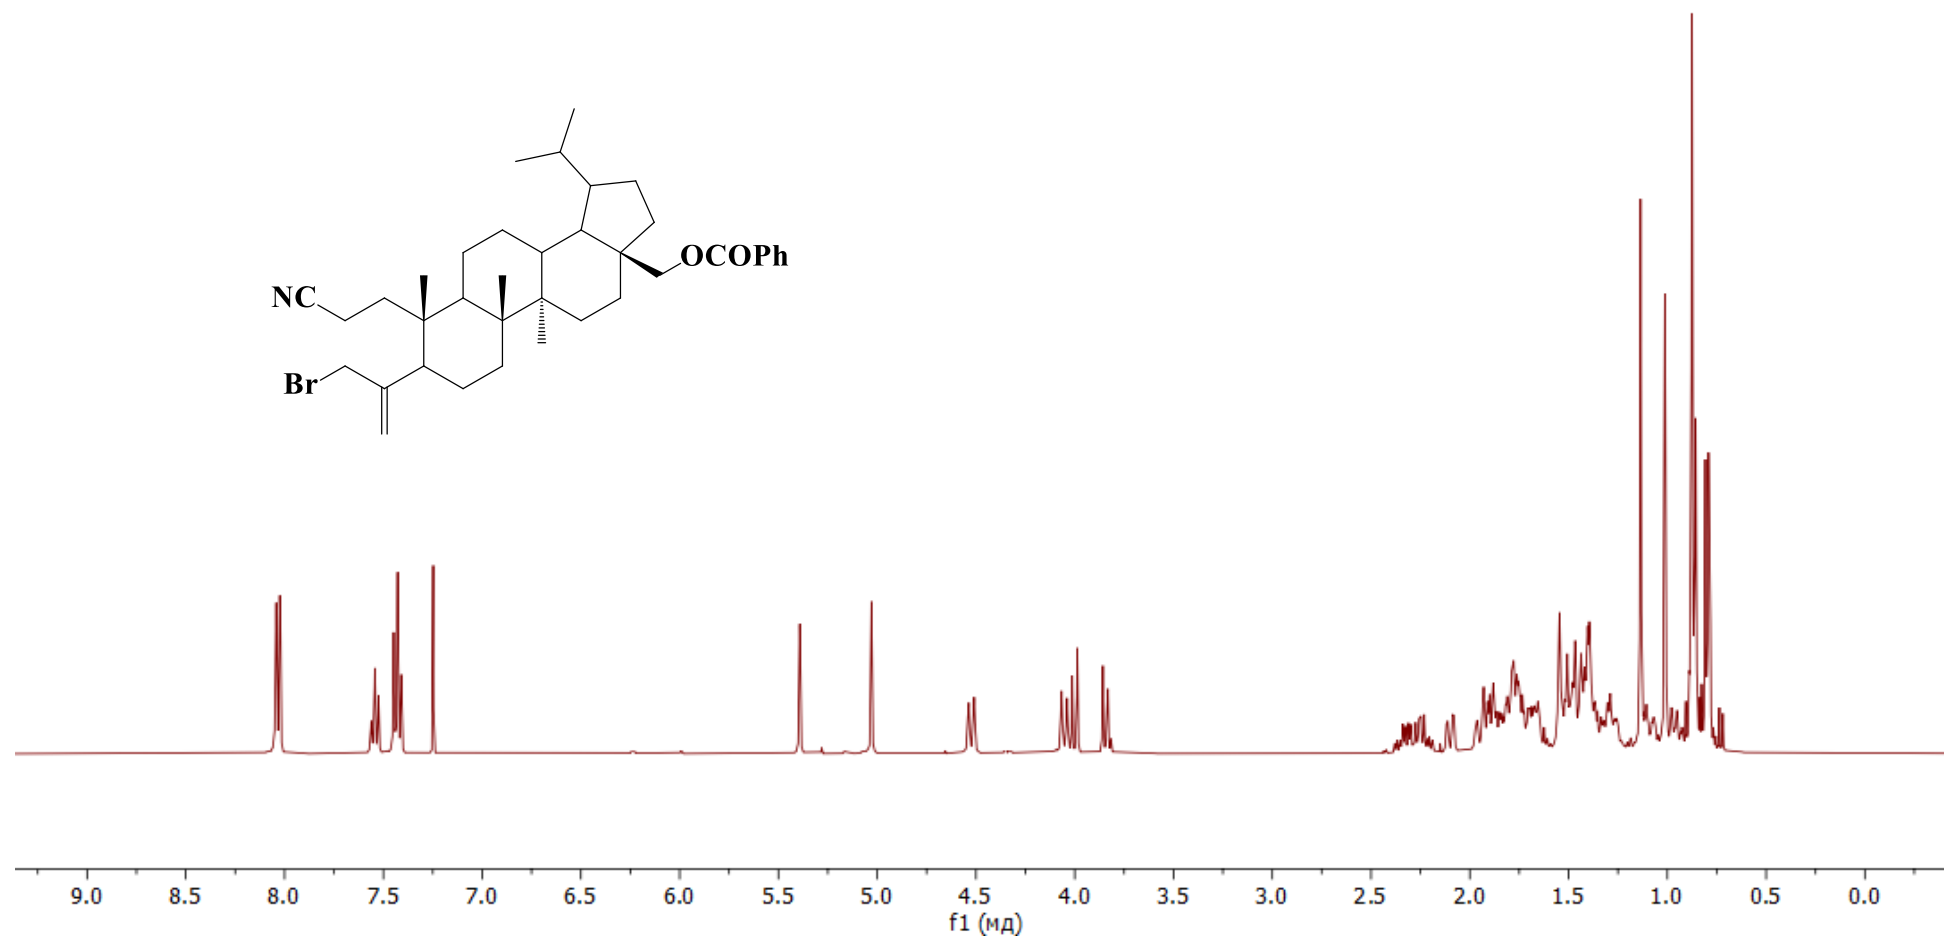

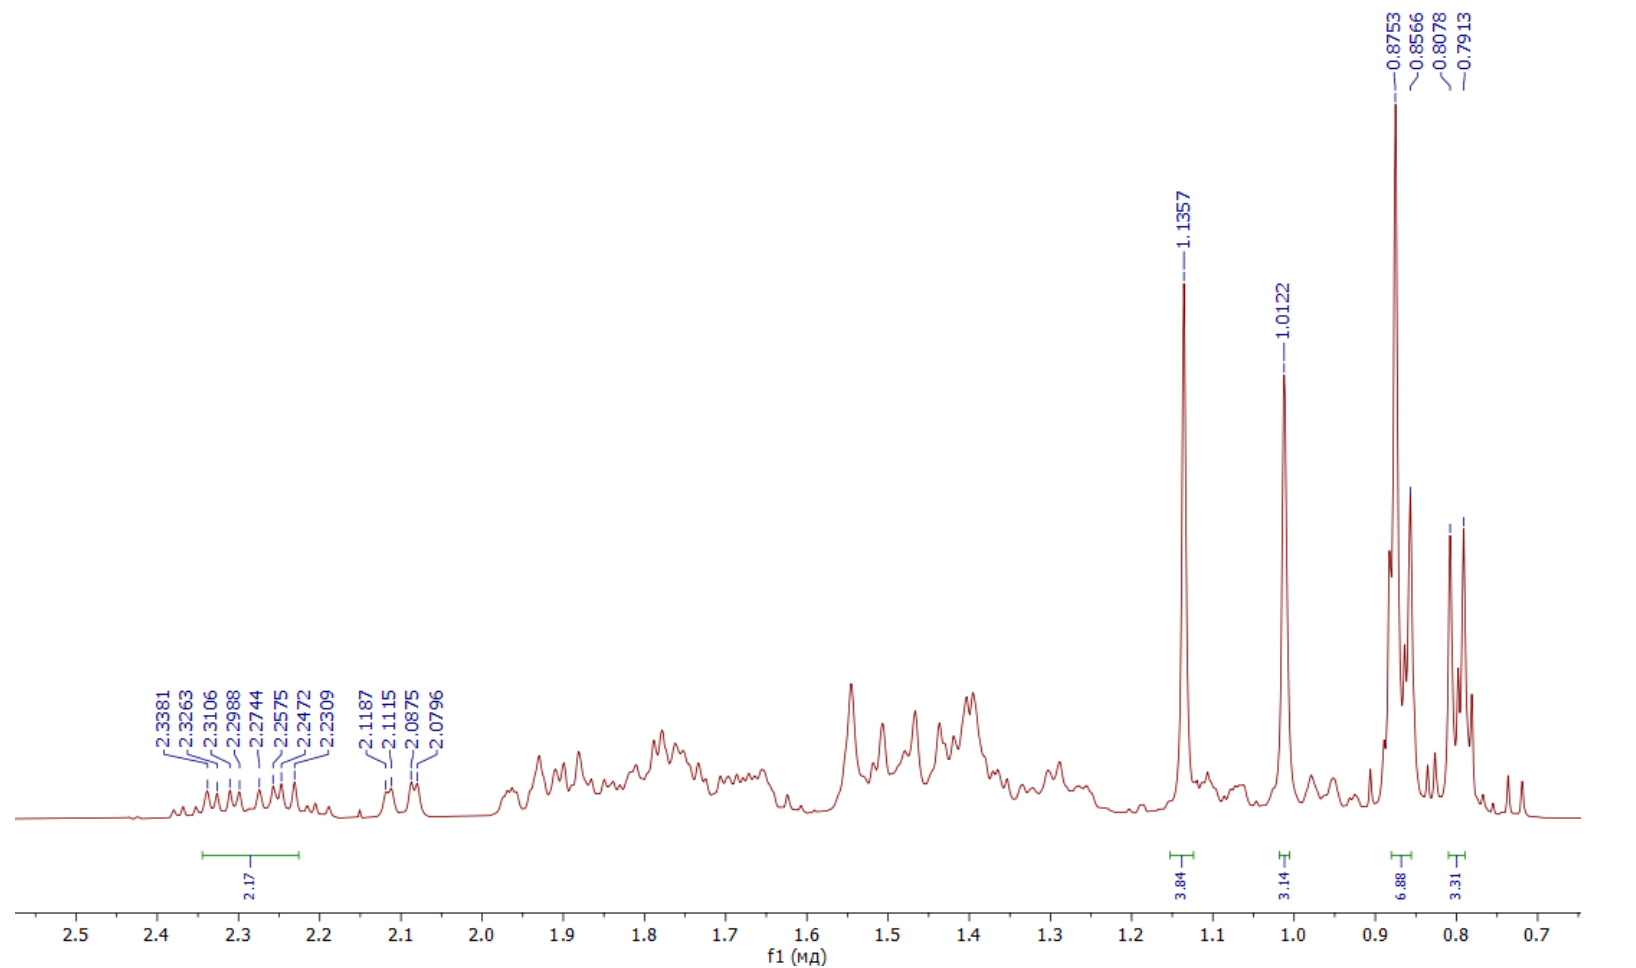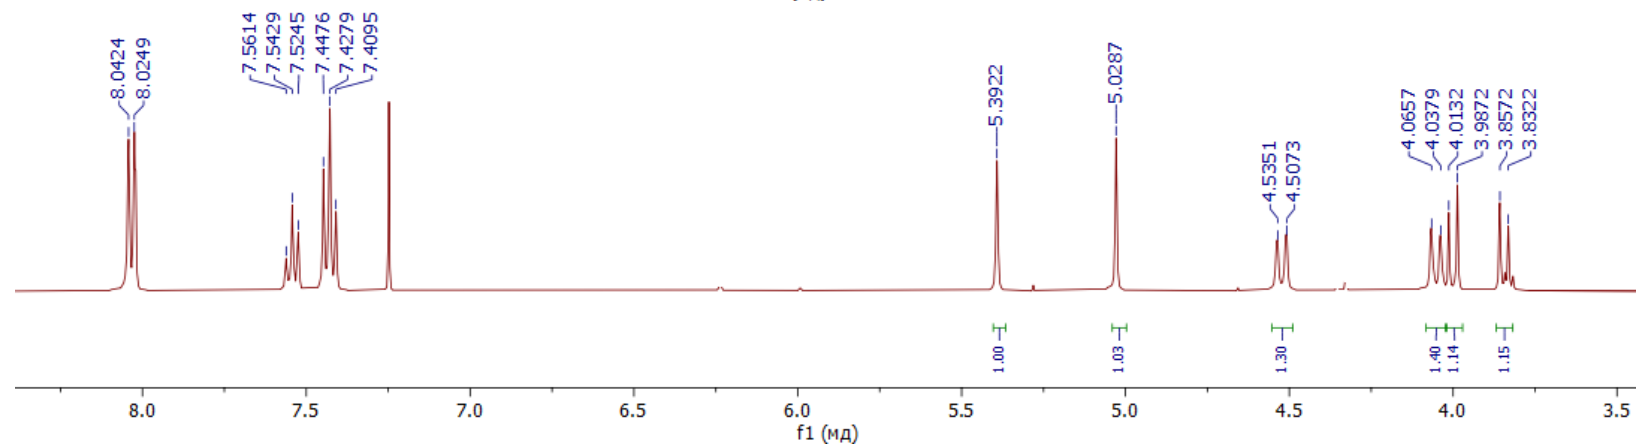

$^{13}\text{C}$  NMR spectra of 28-Benzoxy-24-bromo-2-cyano-3,4-seco-3-norlup-4(23)-ene (6).

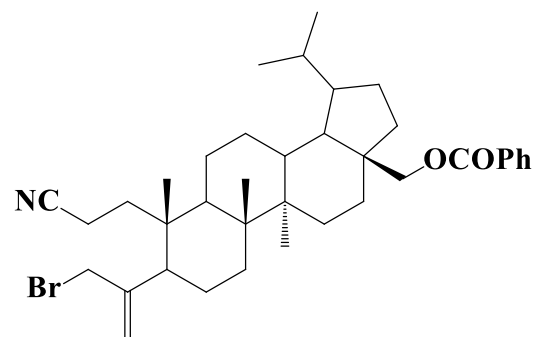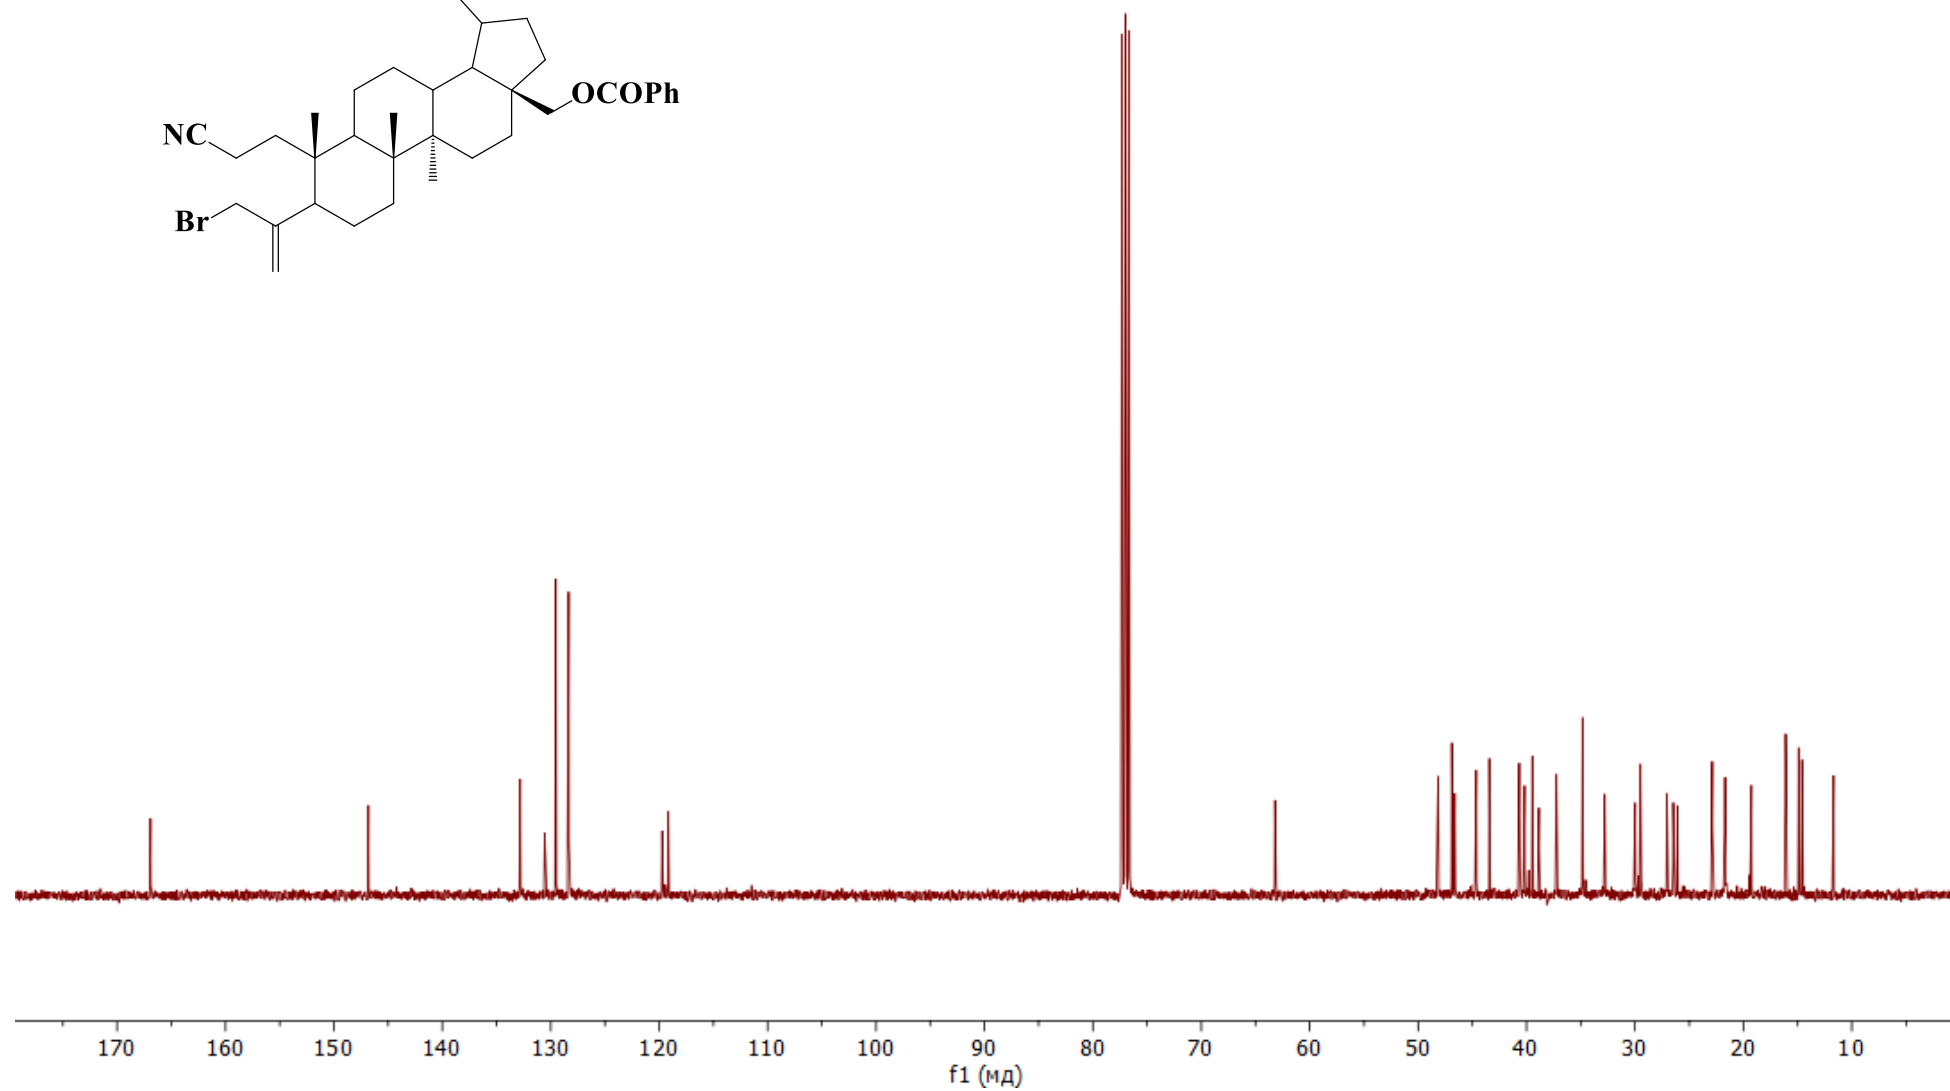

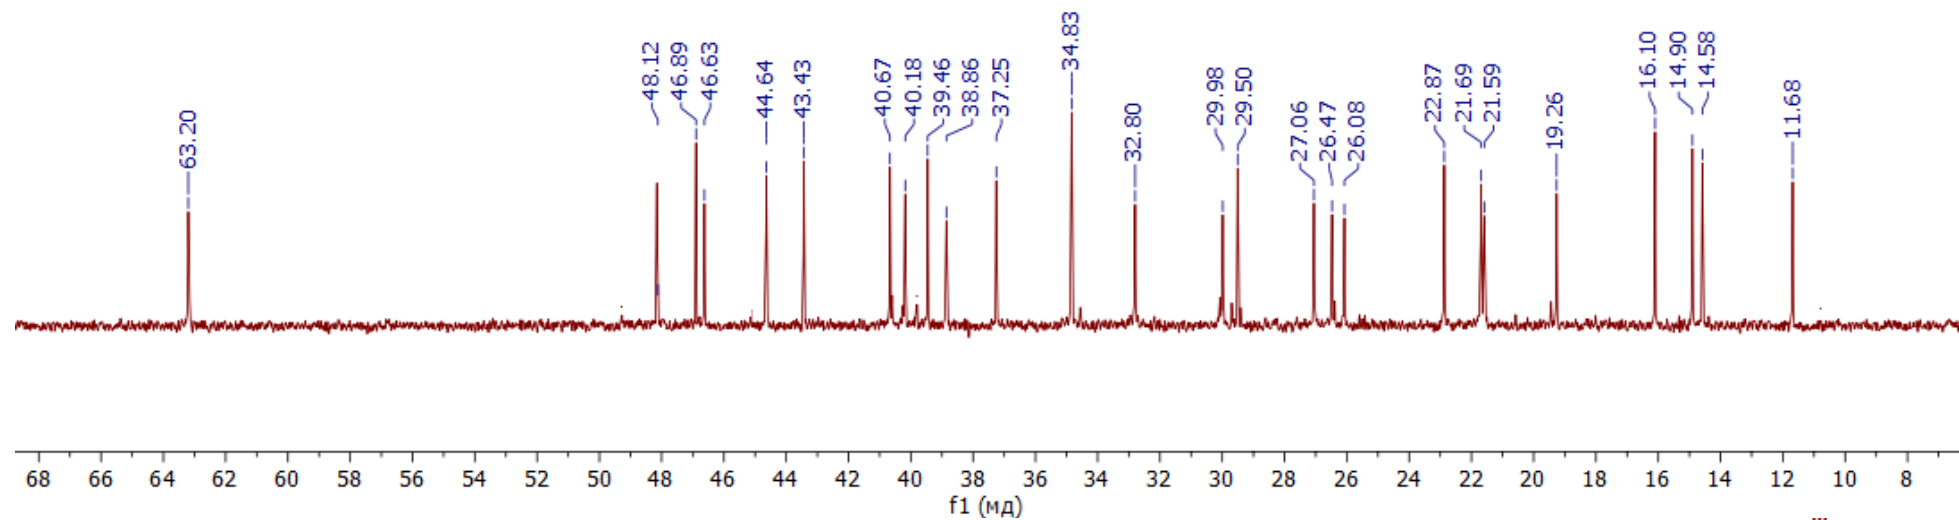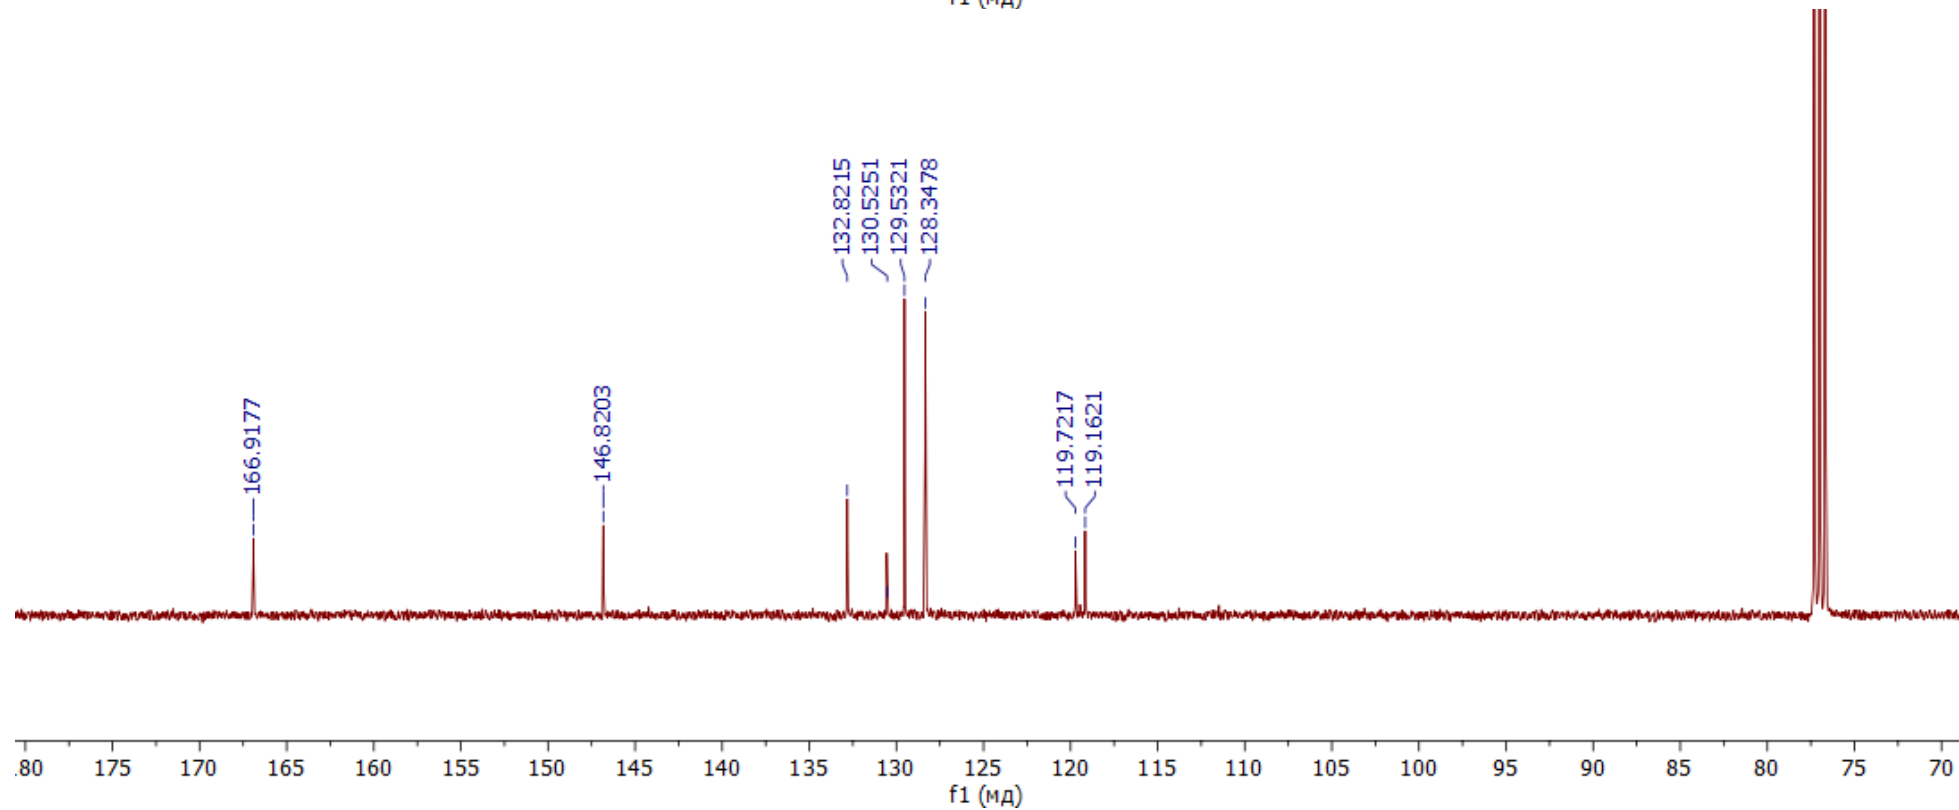

$^1\text{H}$  NMR spectra of 24-Bromo-2-cyano-3-norlup-4(23)-en-28-oic acid methyl ester (7).

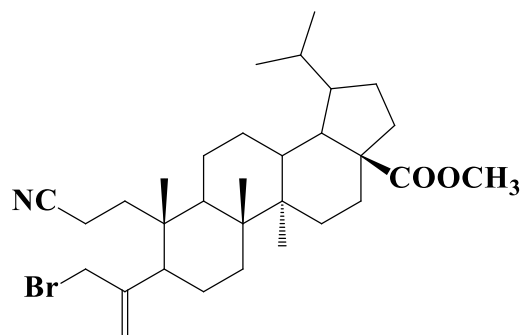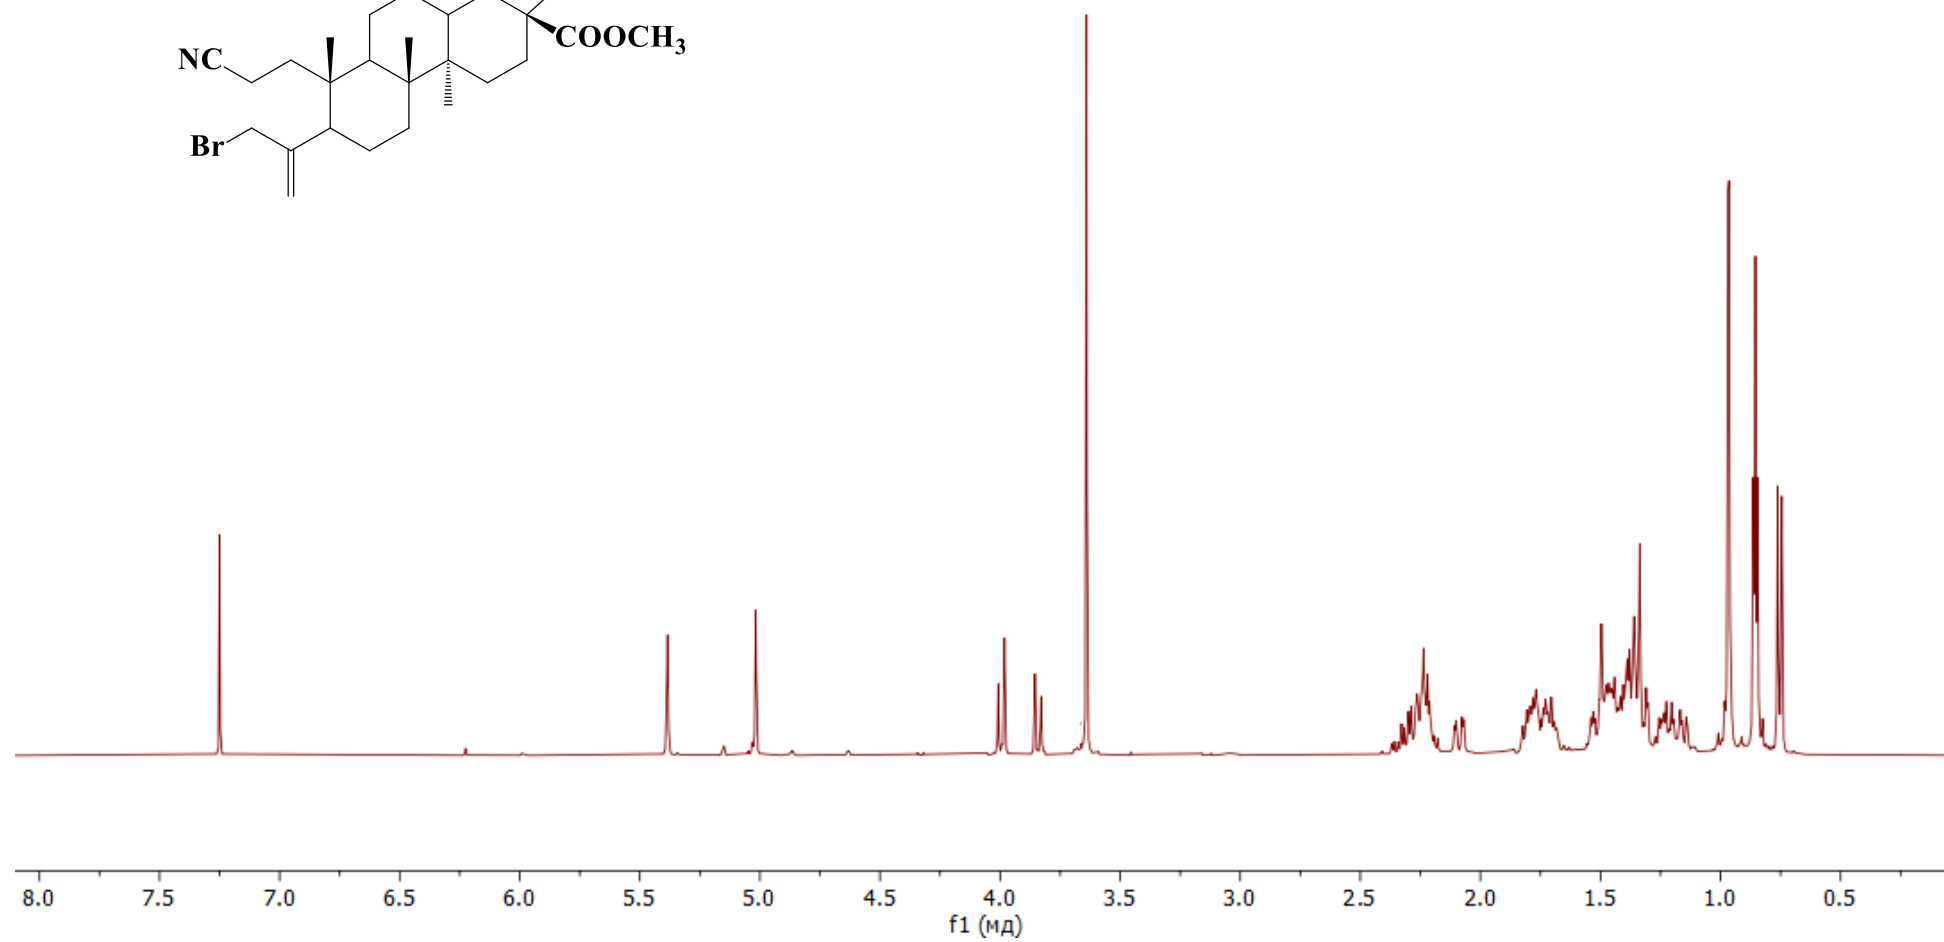

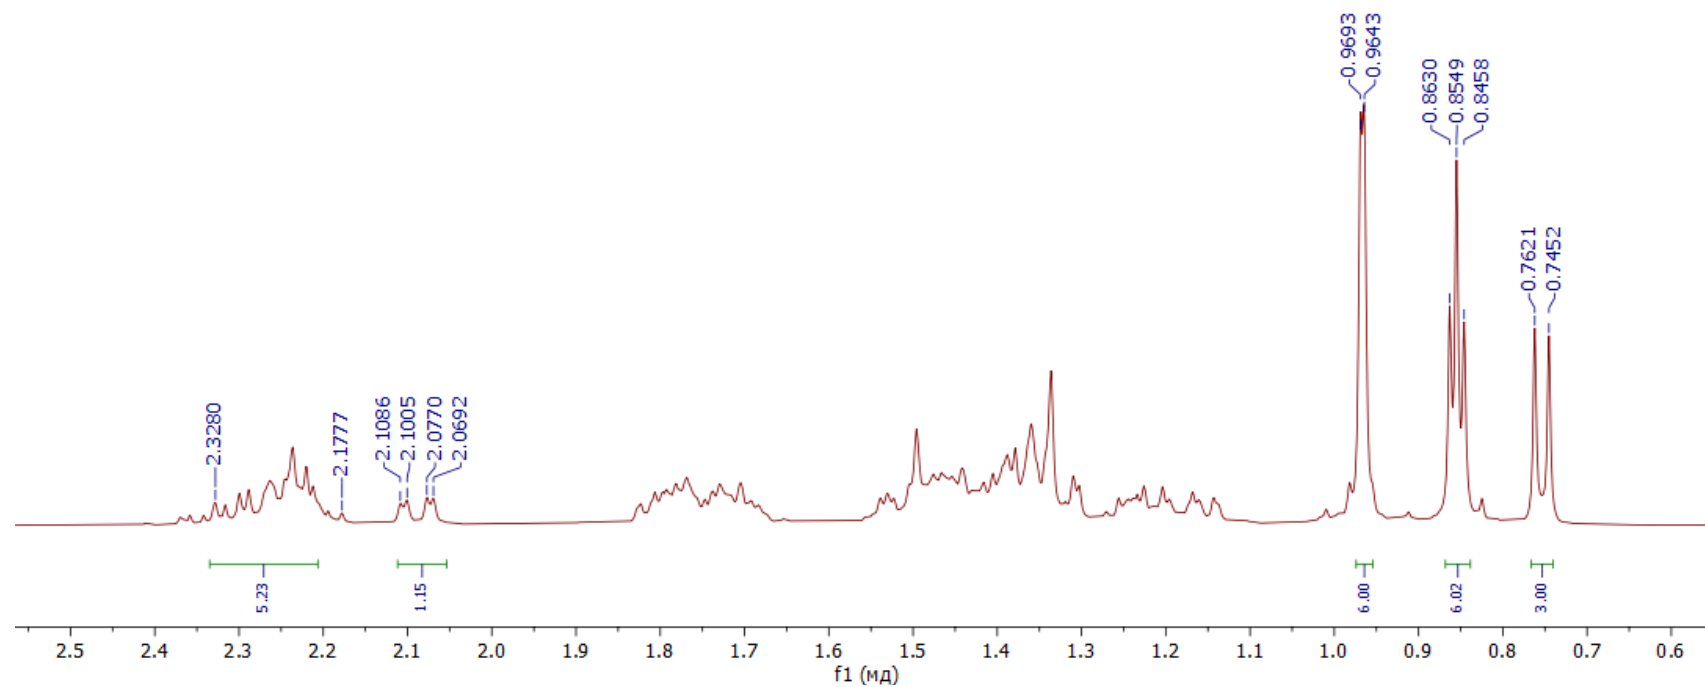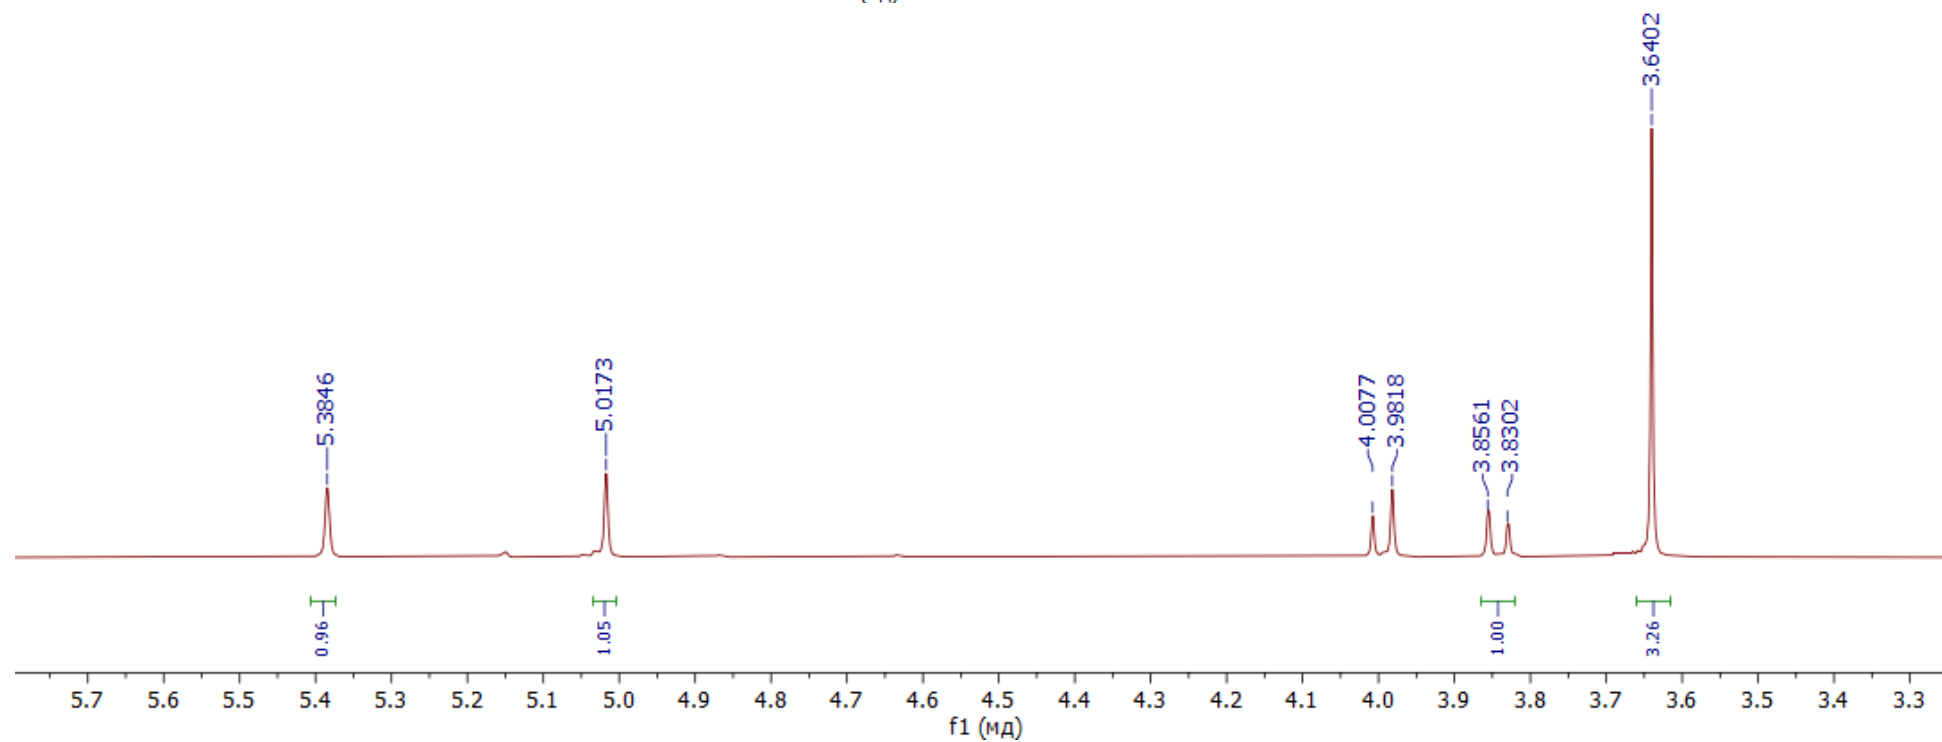

<sup>13</sup>C NMR spectra of 24-Bromo-2-cyano-3-norlup-4(23)-en-28-oic acid methyl ester (7).

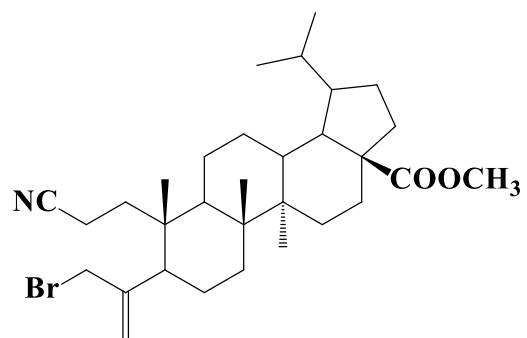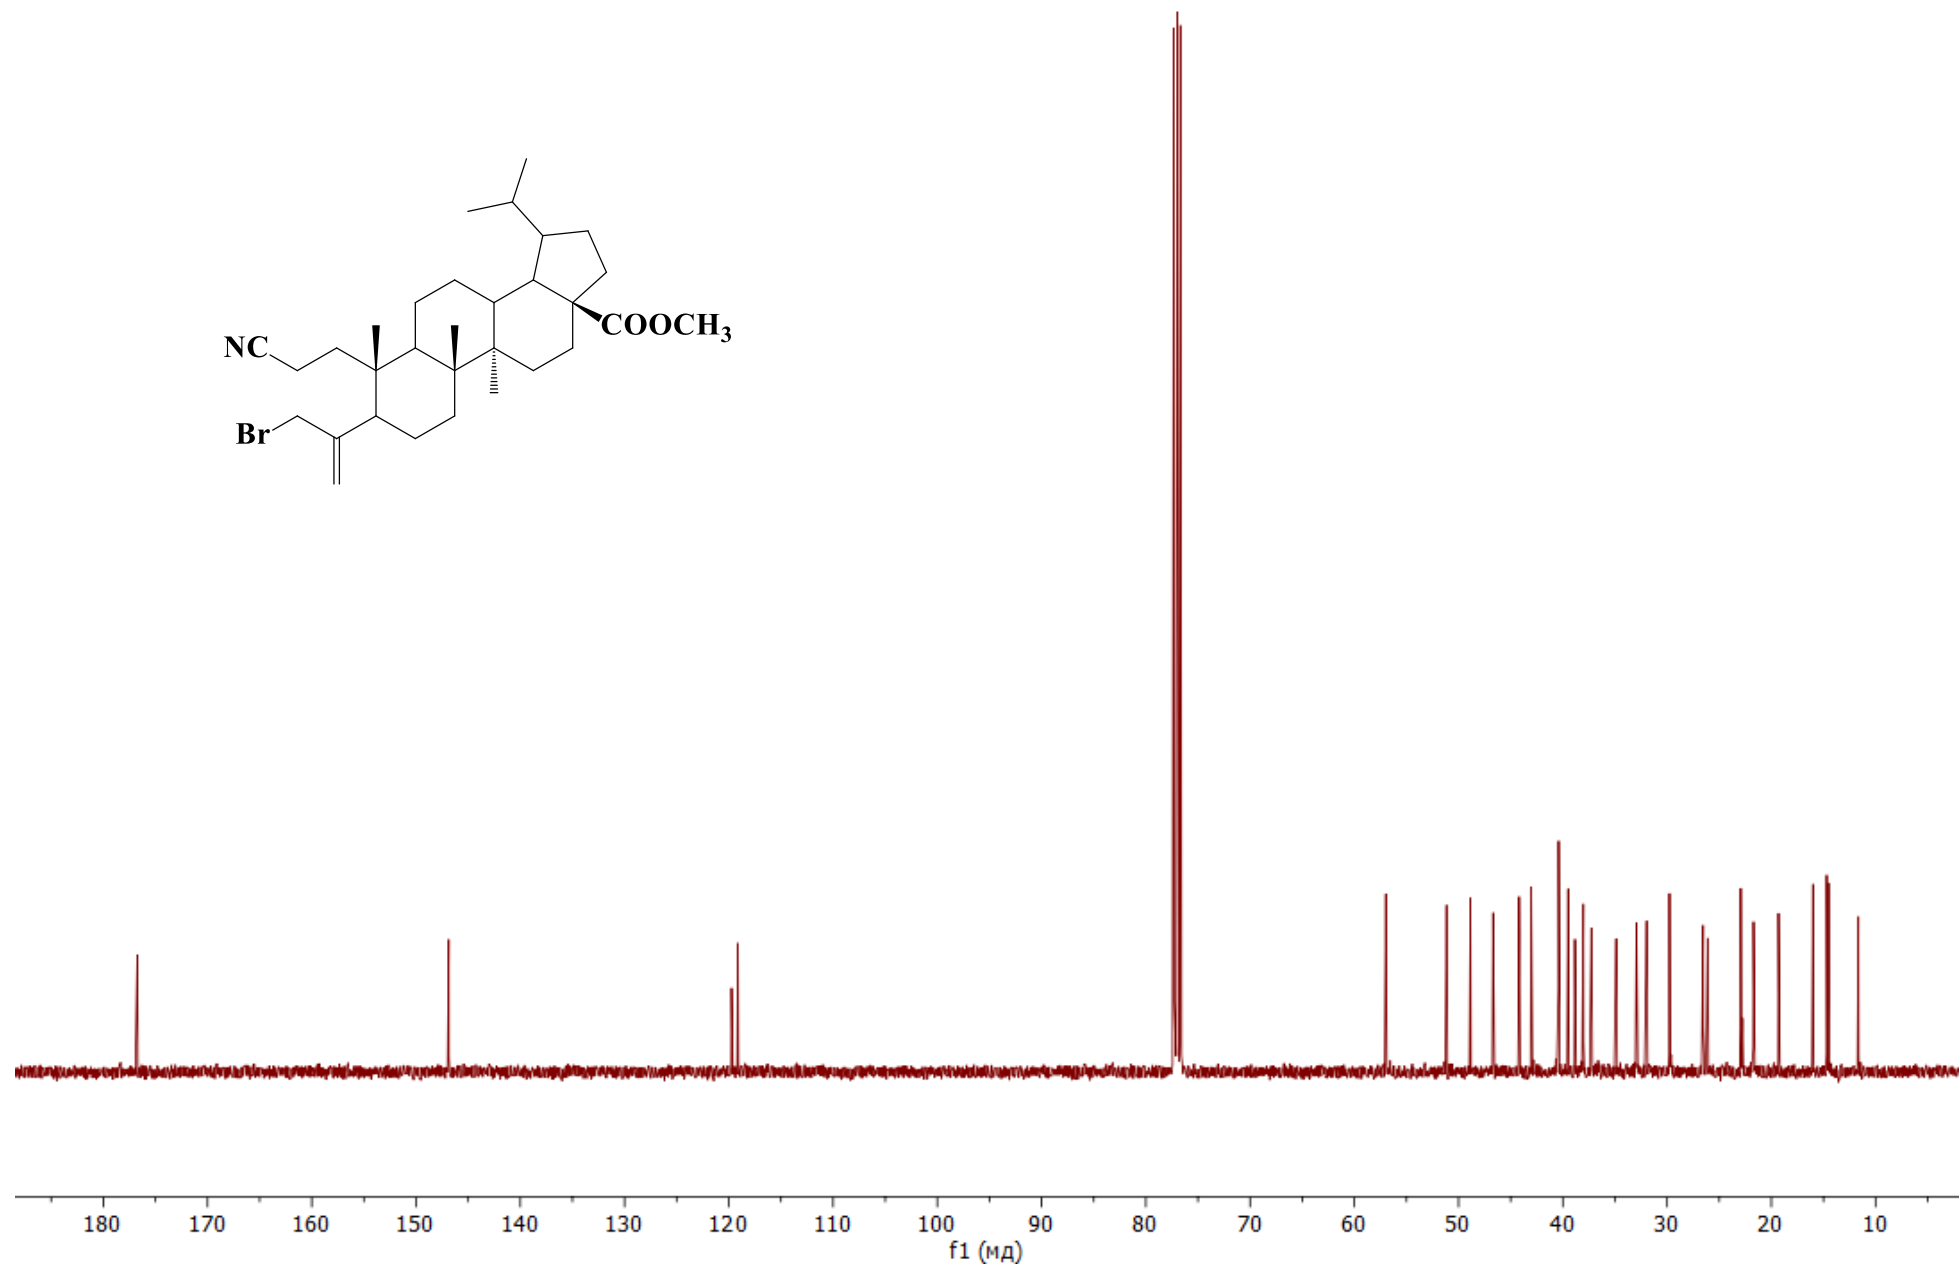



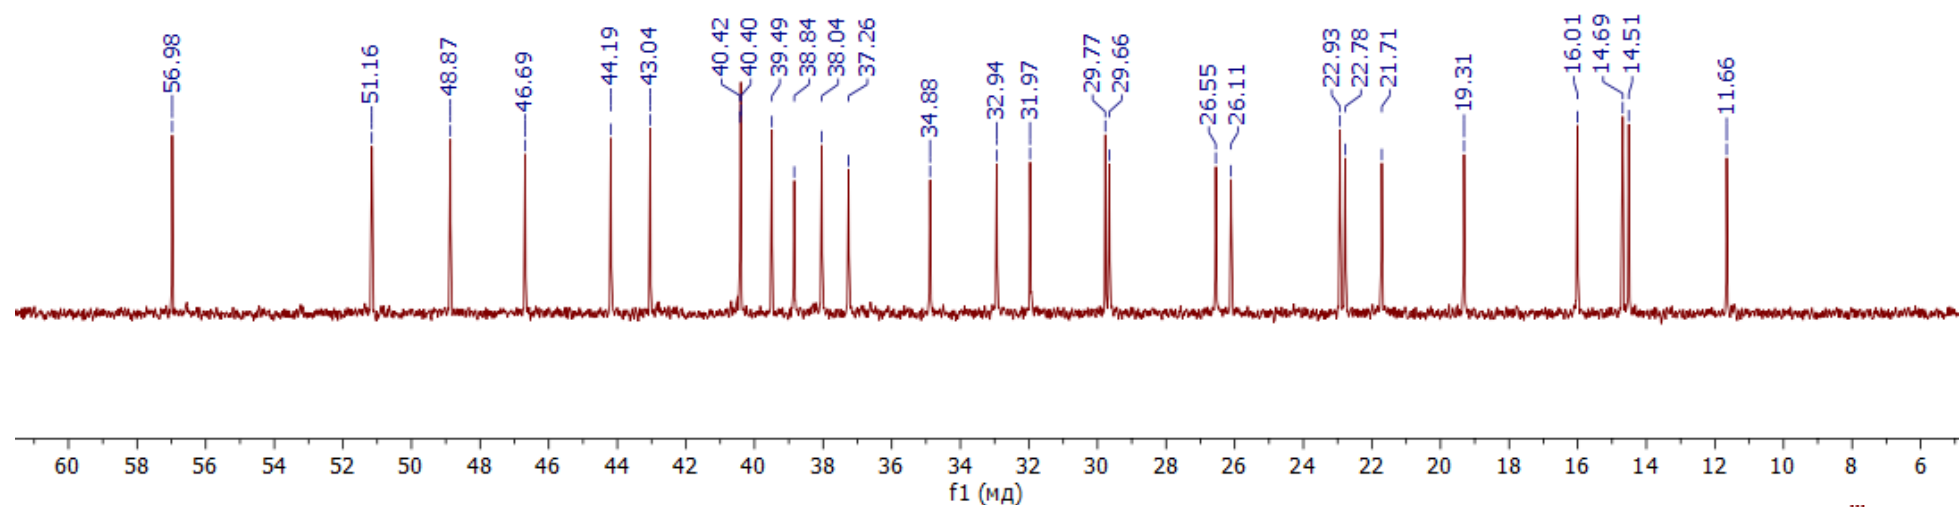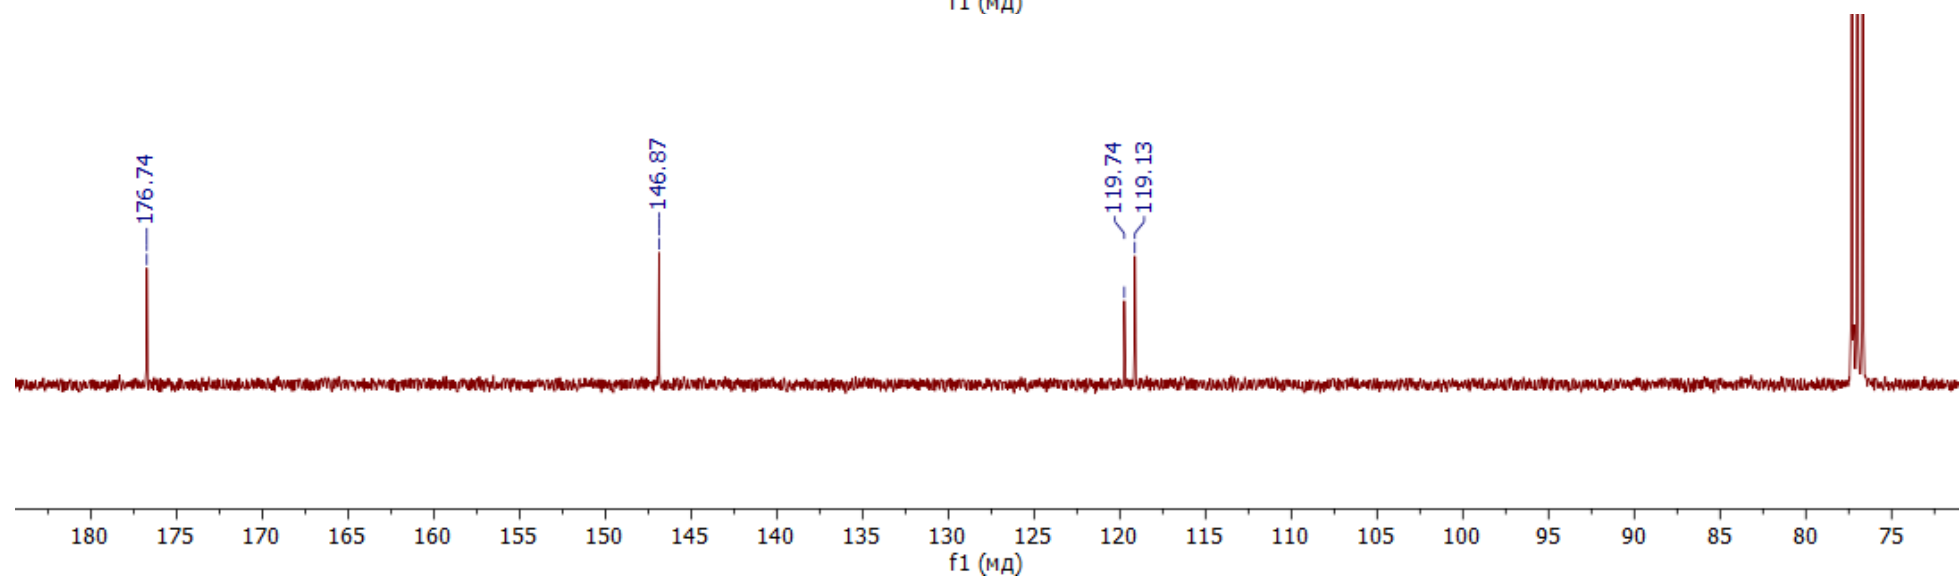

$^1\text{H}$  NMR spectra of 2-Cyano-28-hydroxy-3-norlup-2(24),4(23)-diene (8).

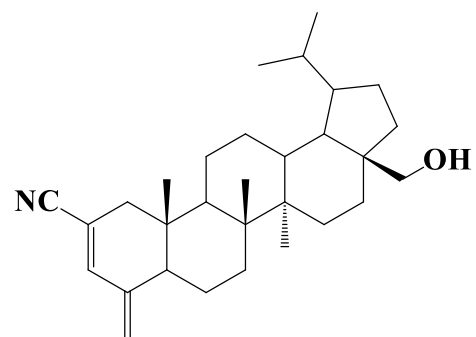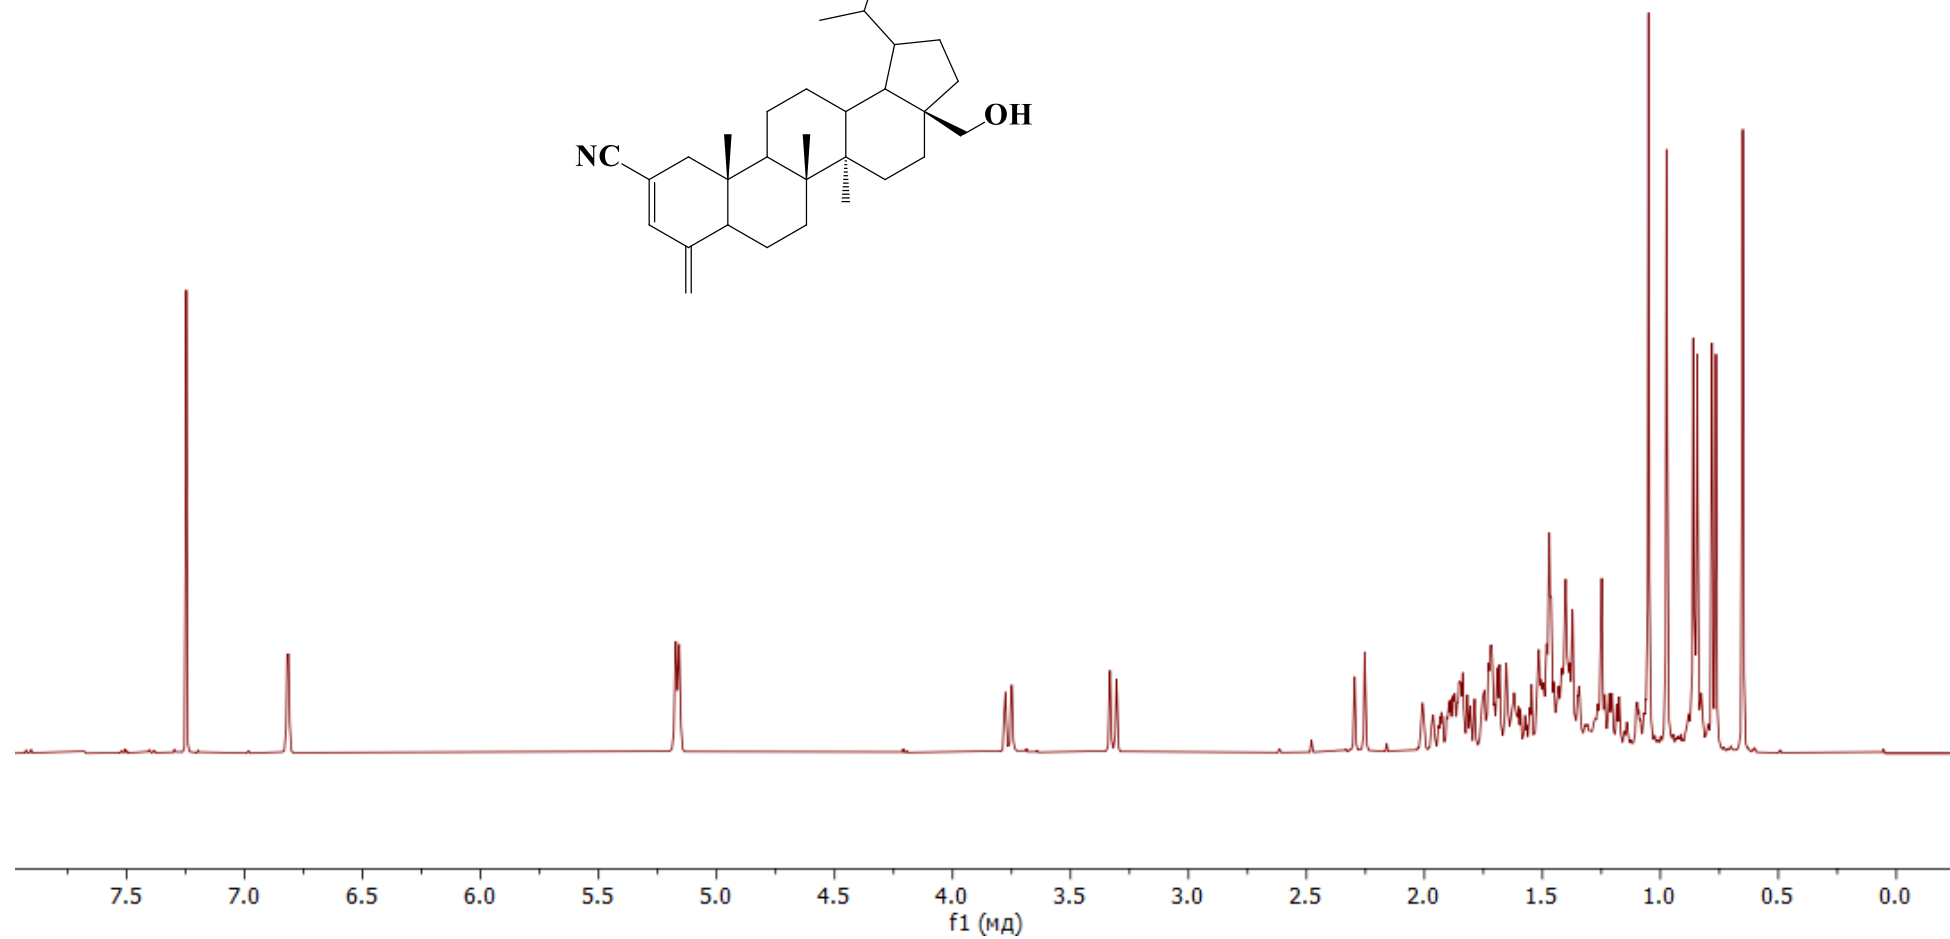

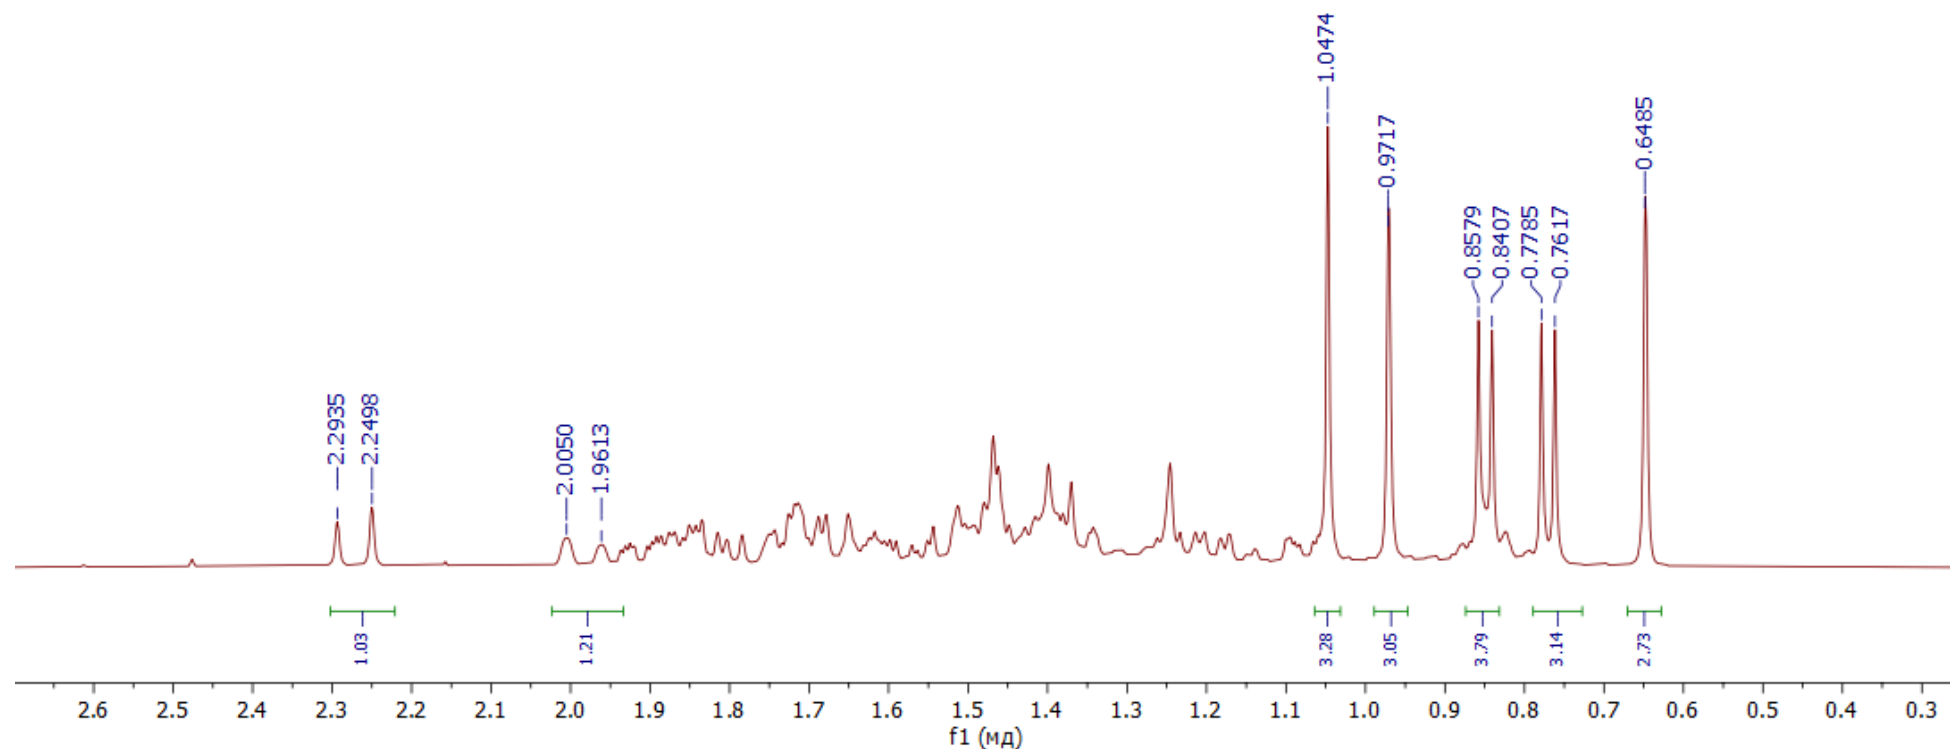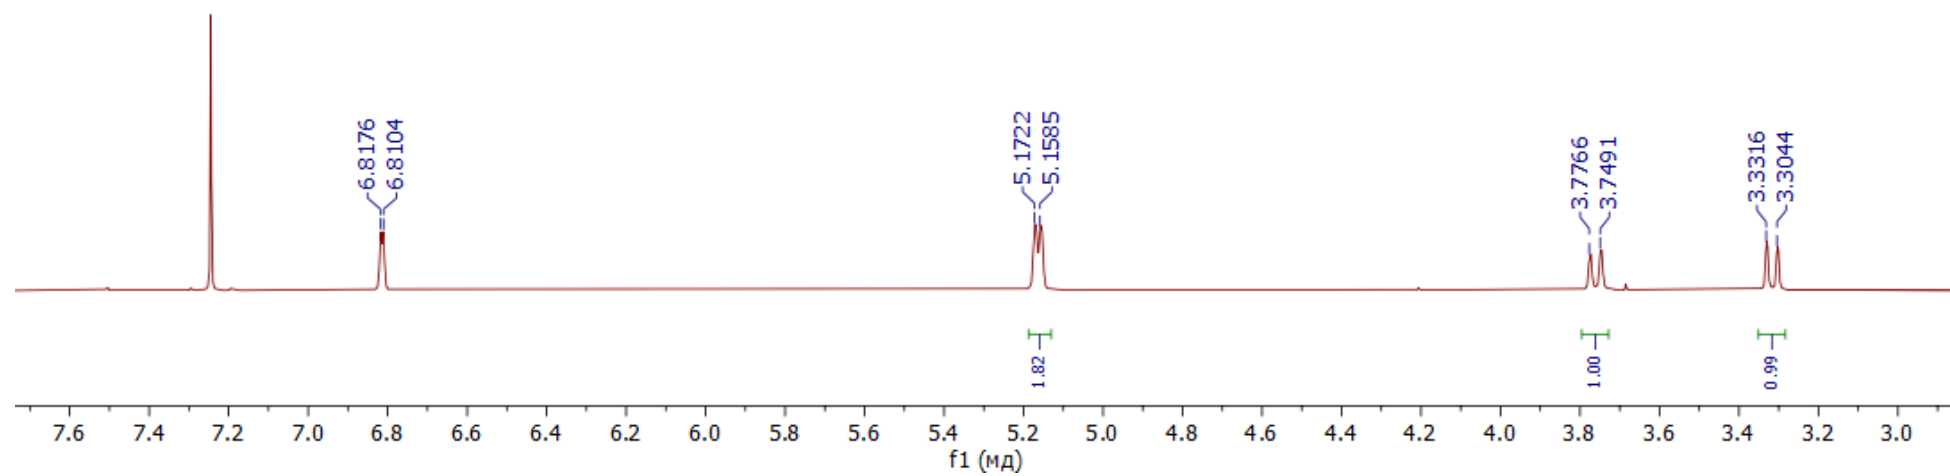

$^{13}\text{C}$  NMR spectra of 2-Cyano-28-hydroxy-3-norlup-2(24),4(23)-diene (8).

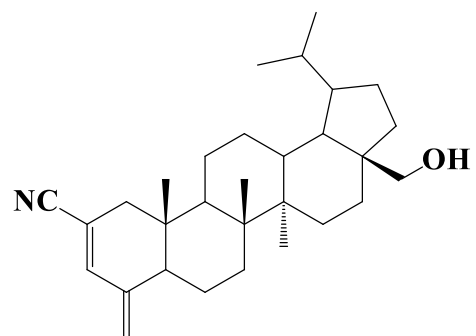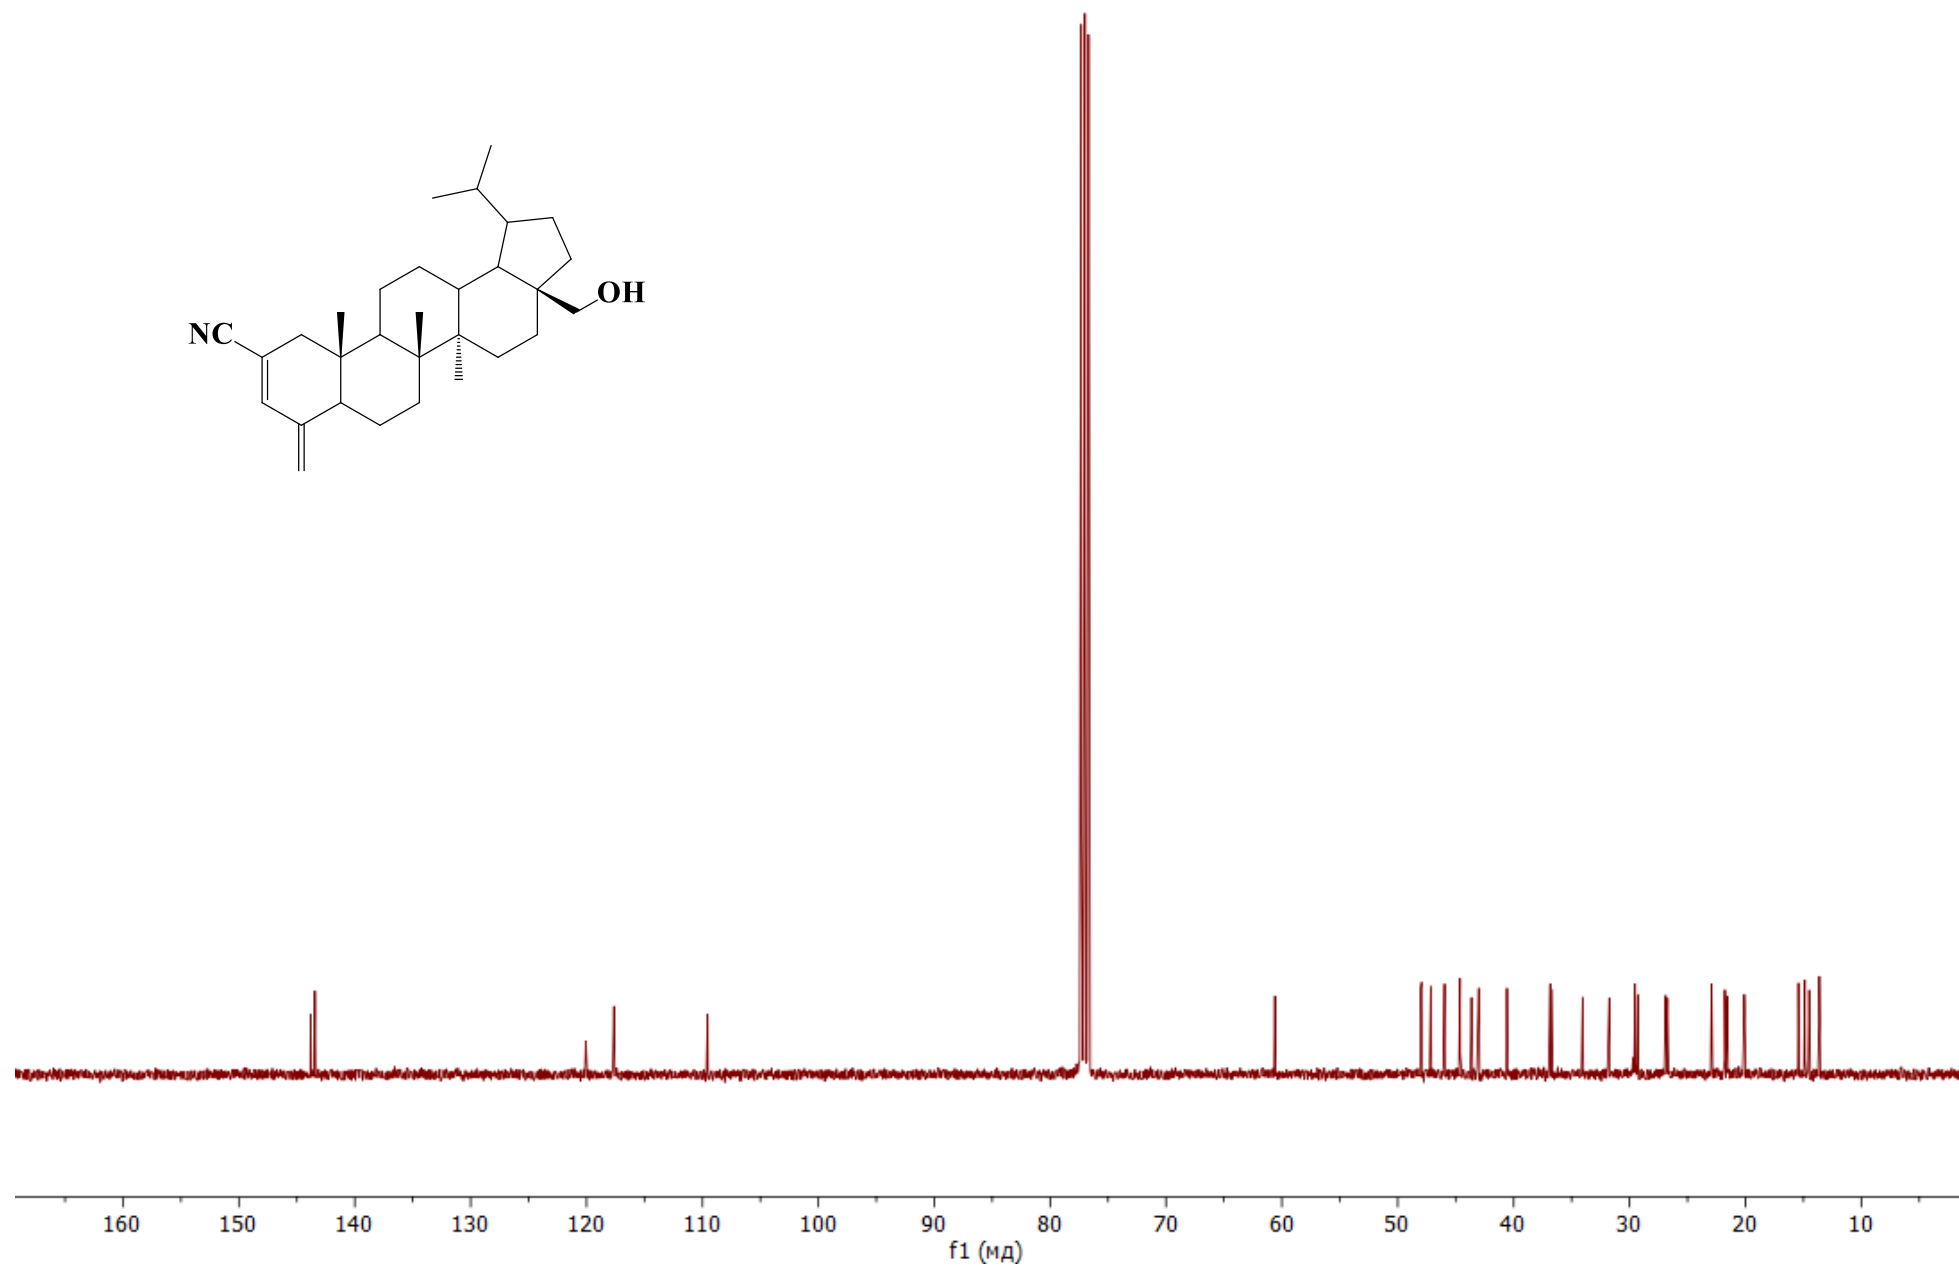

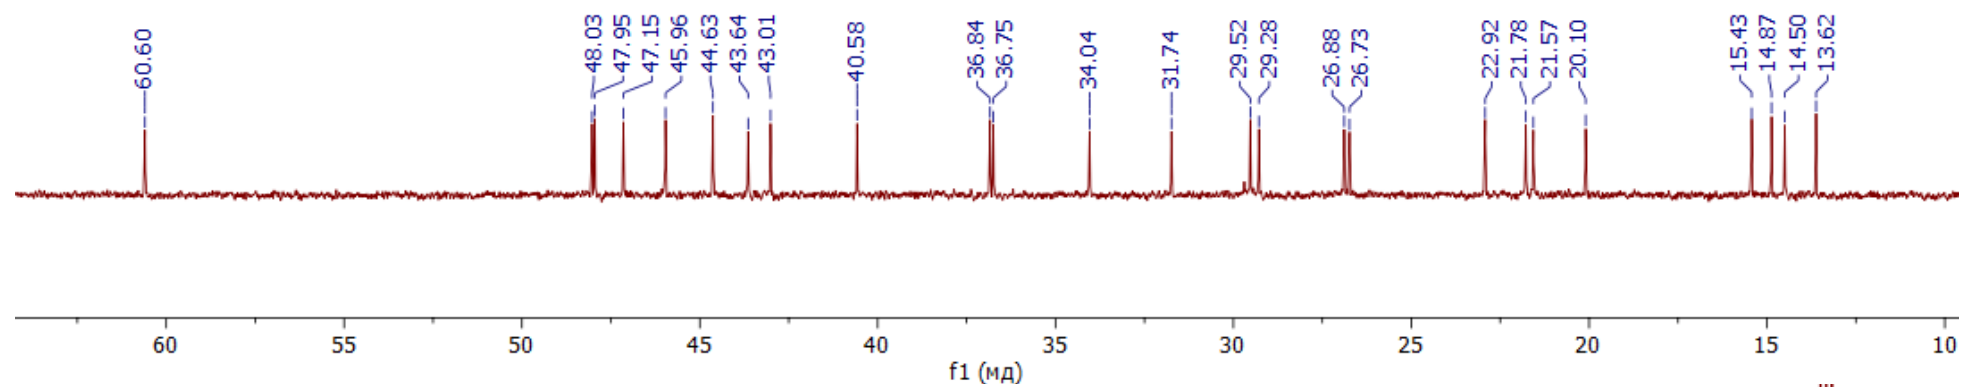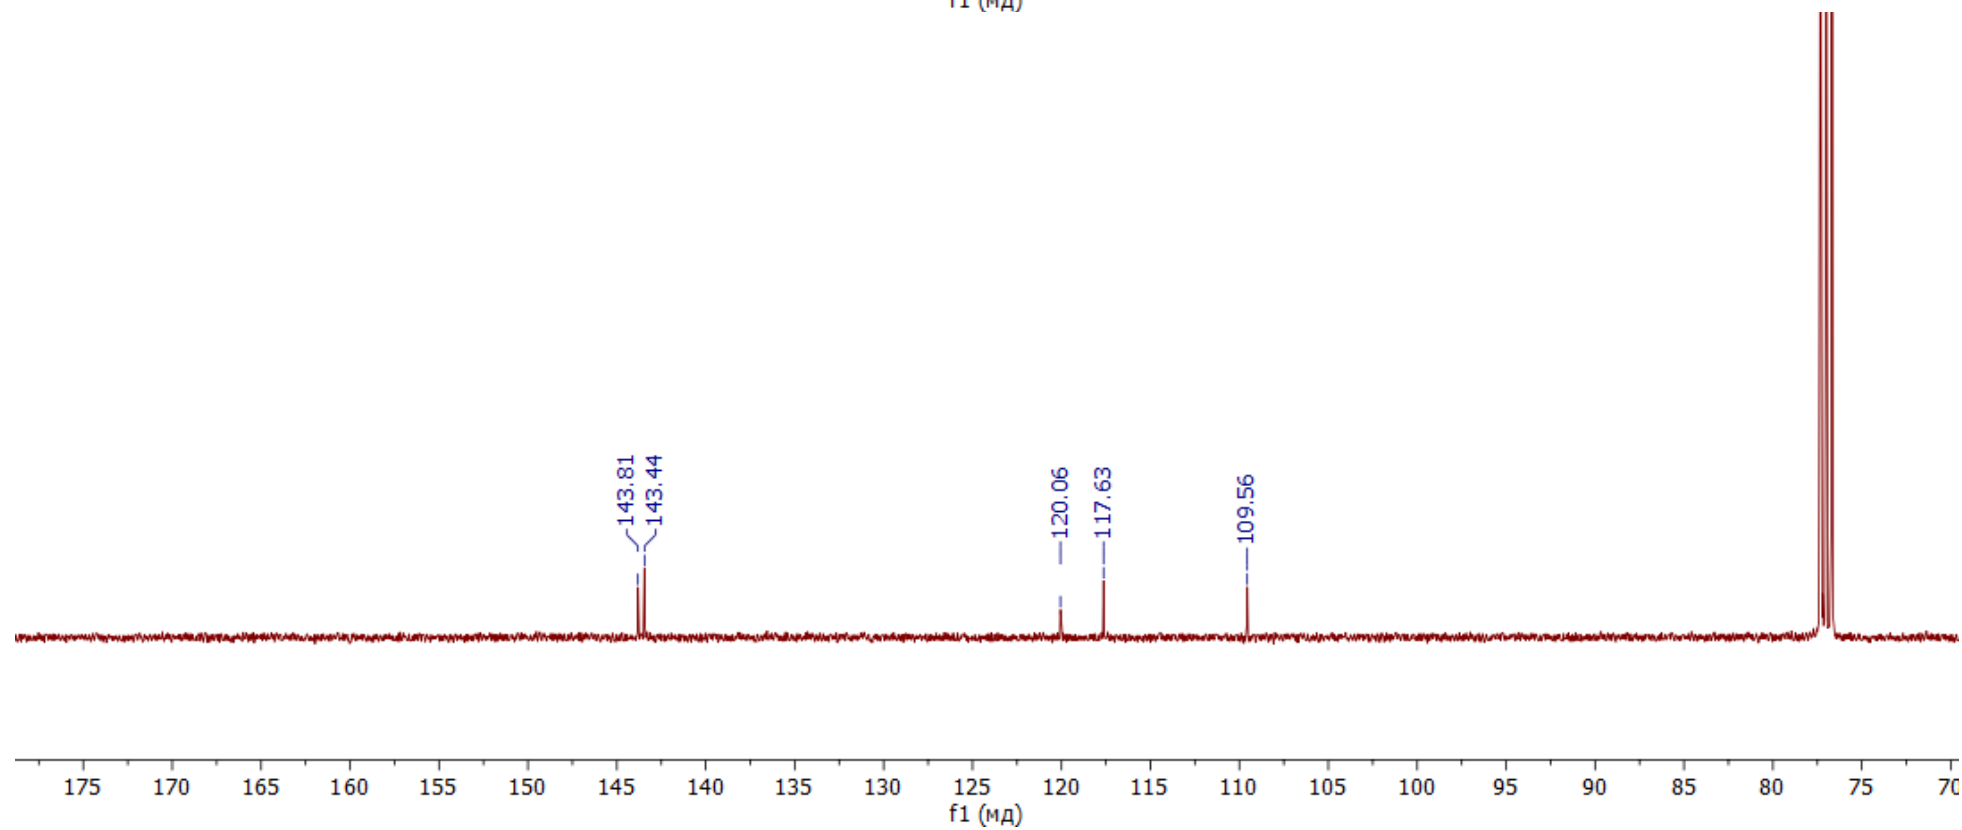

<sup>1</sup>H NMR spectra of 2-Cyano-24,28-dihydroxy-3-norlup-4(23)-ene (9).

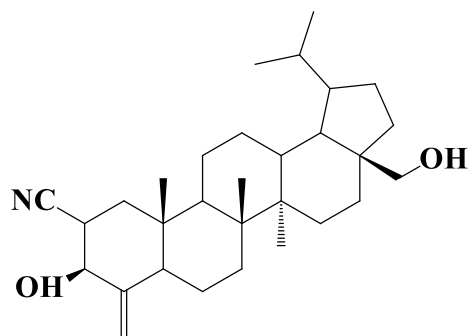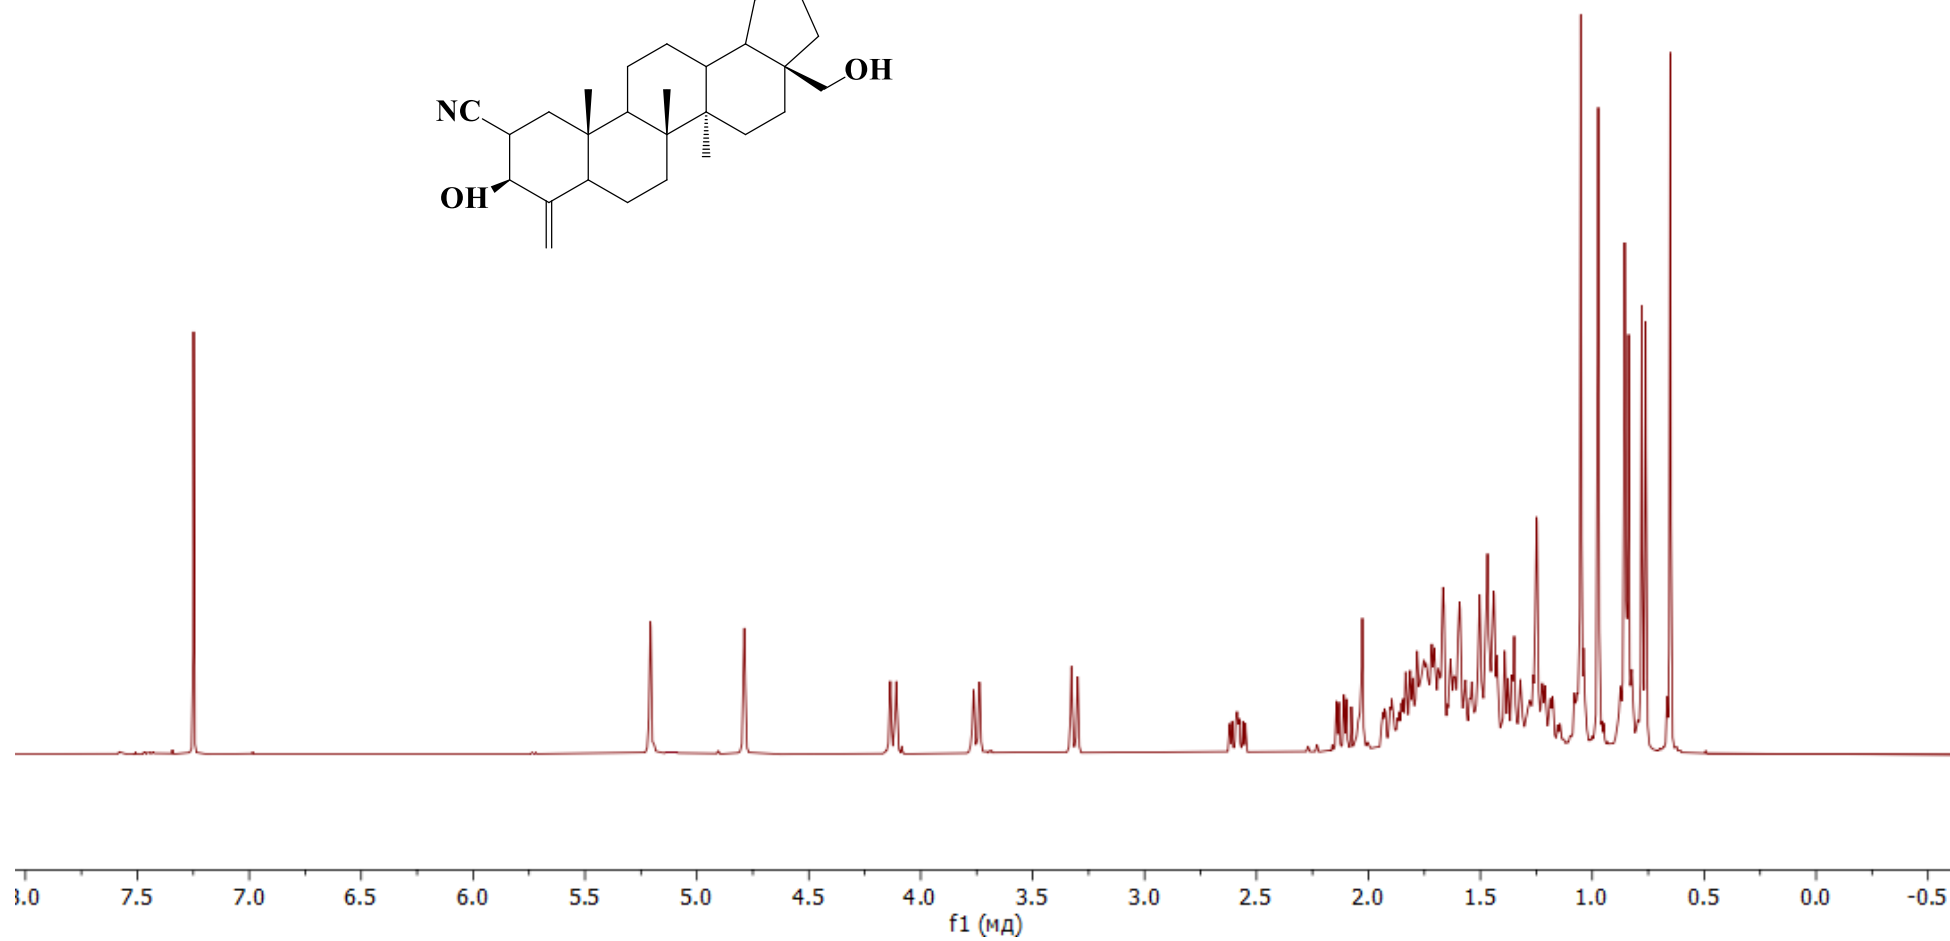

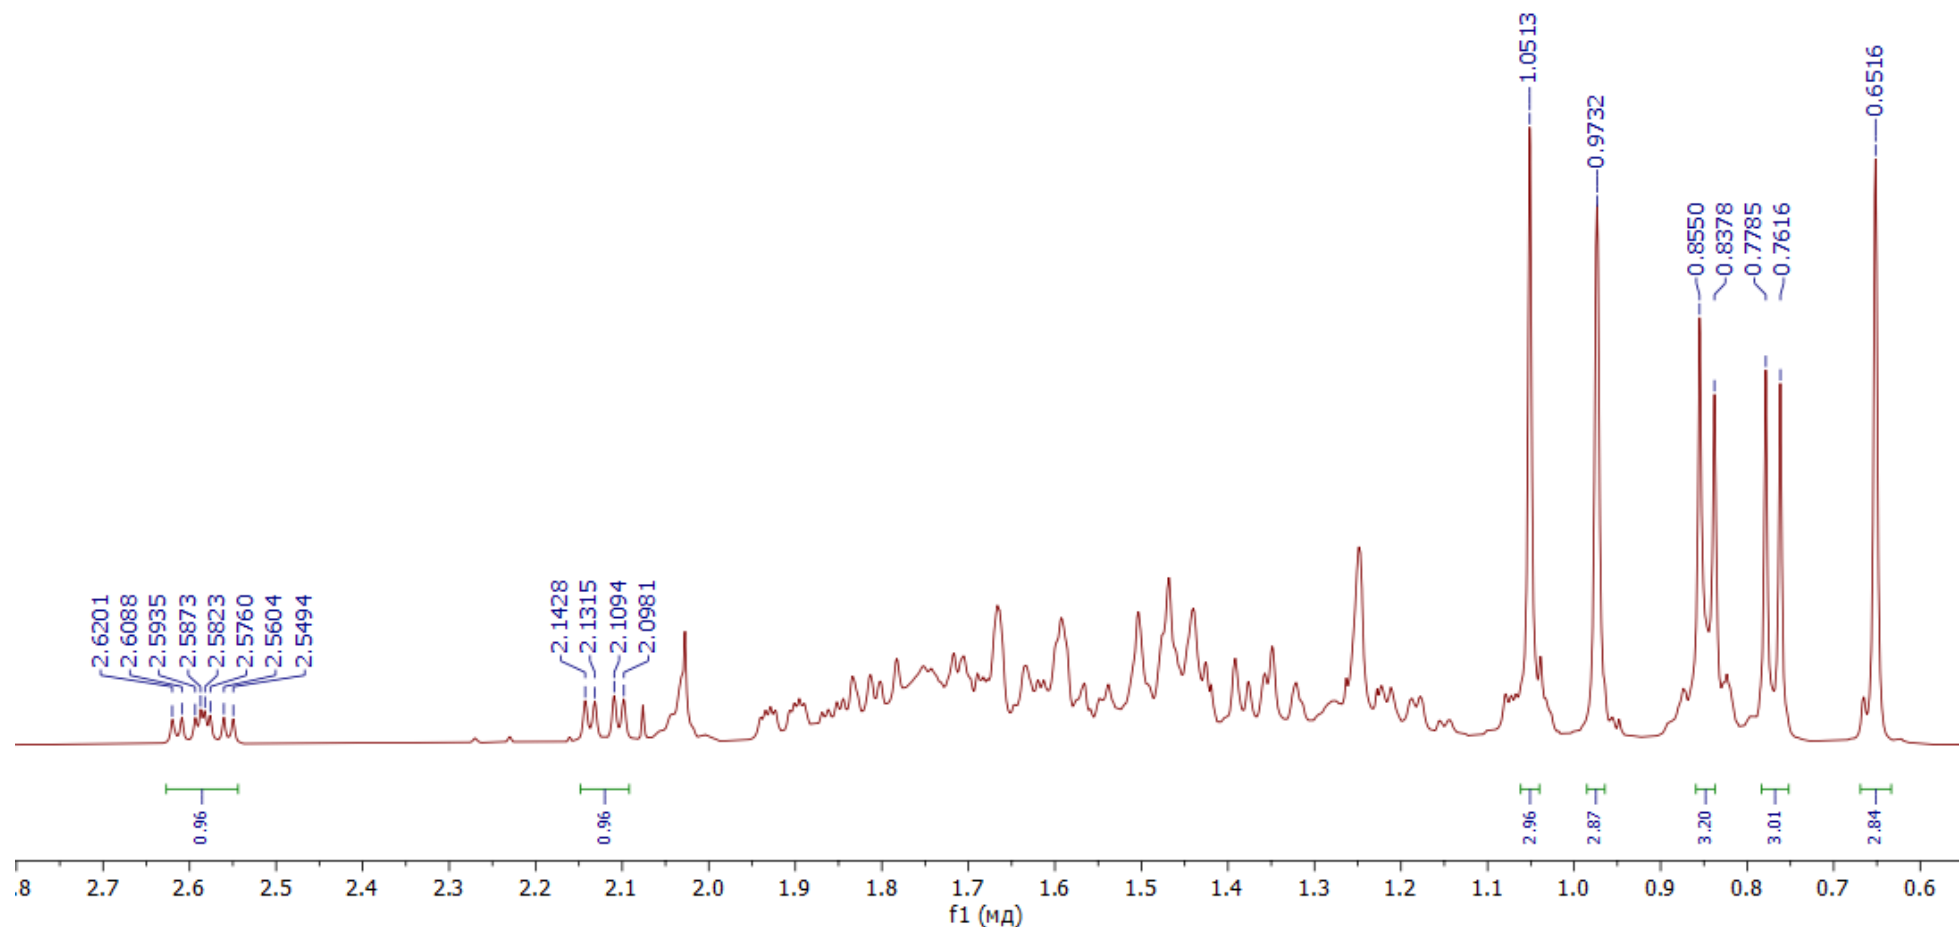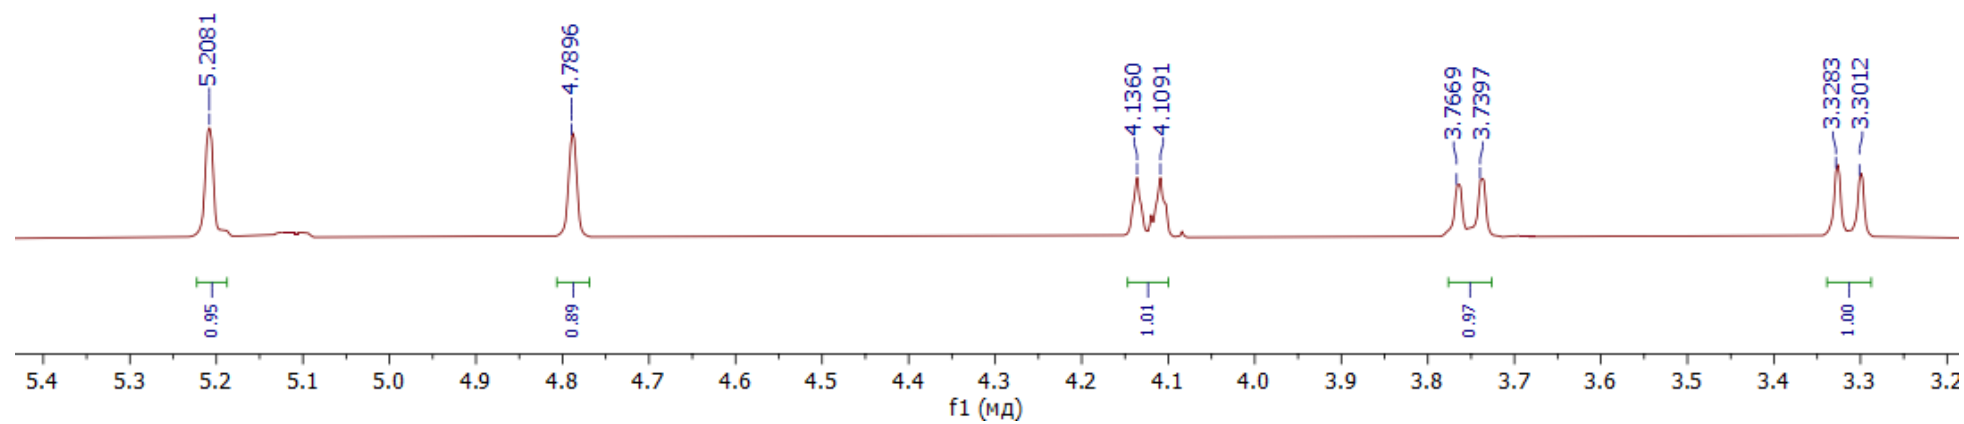

$^{13}\text{C}$  NMR spectra of 2-Cyano-24,28-dihydroxy-3-norlup-4(23)-ene (9).

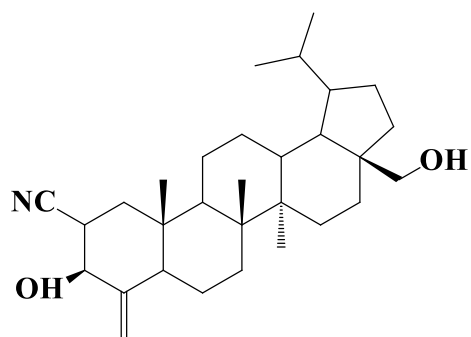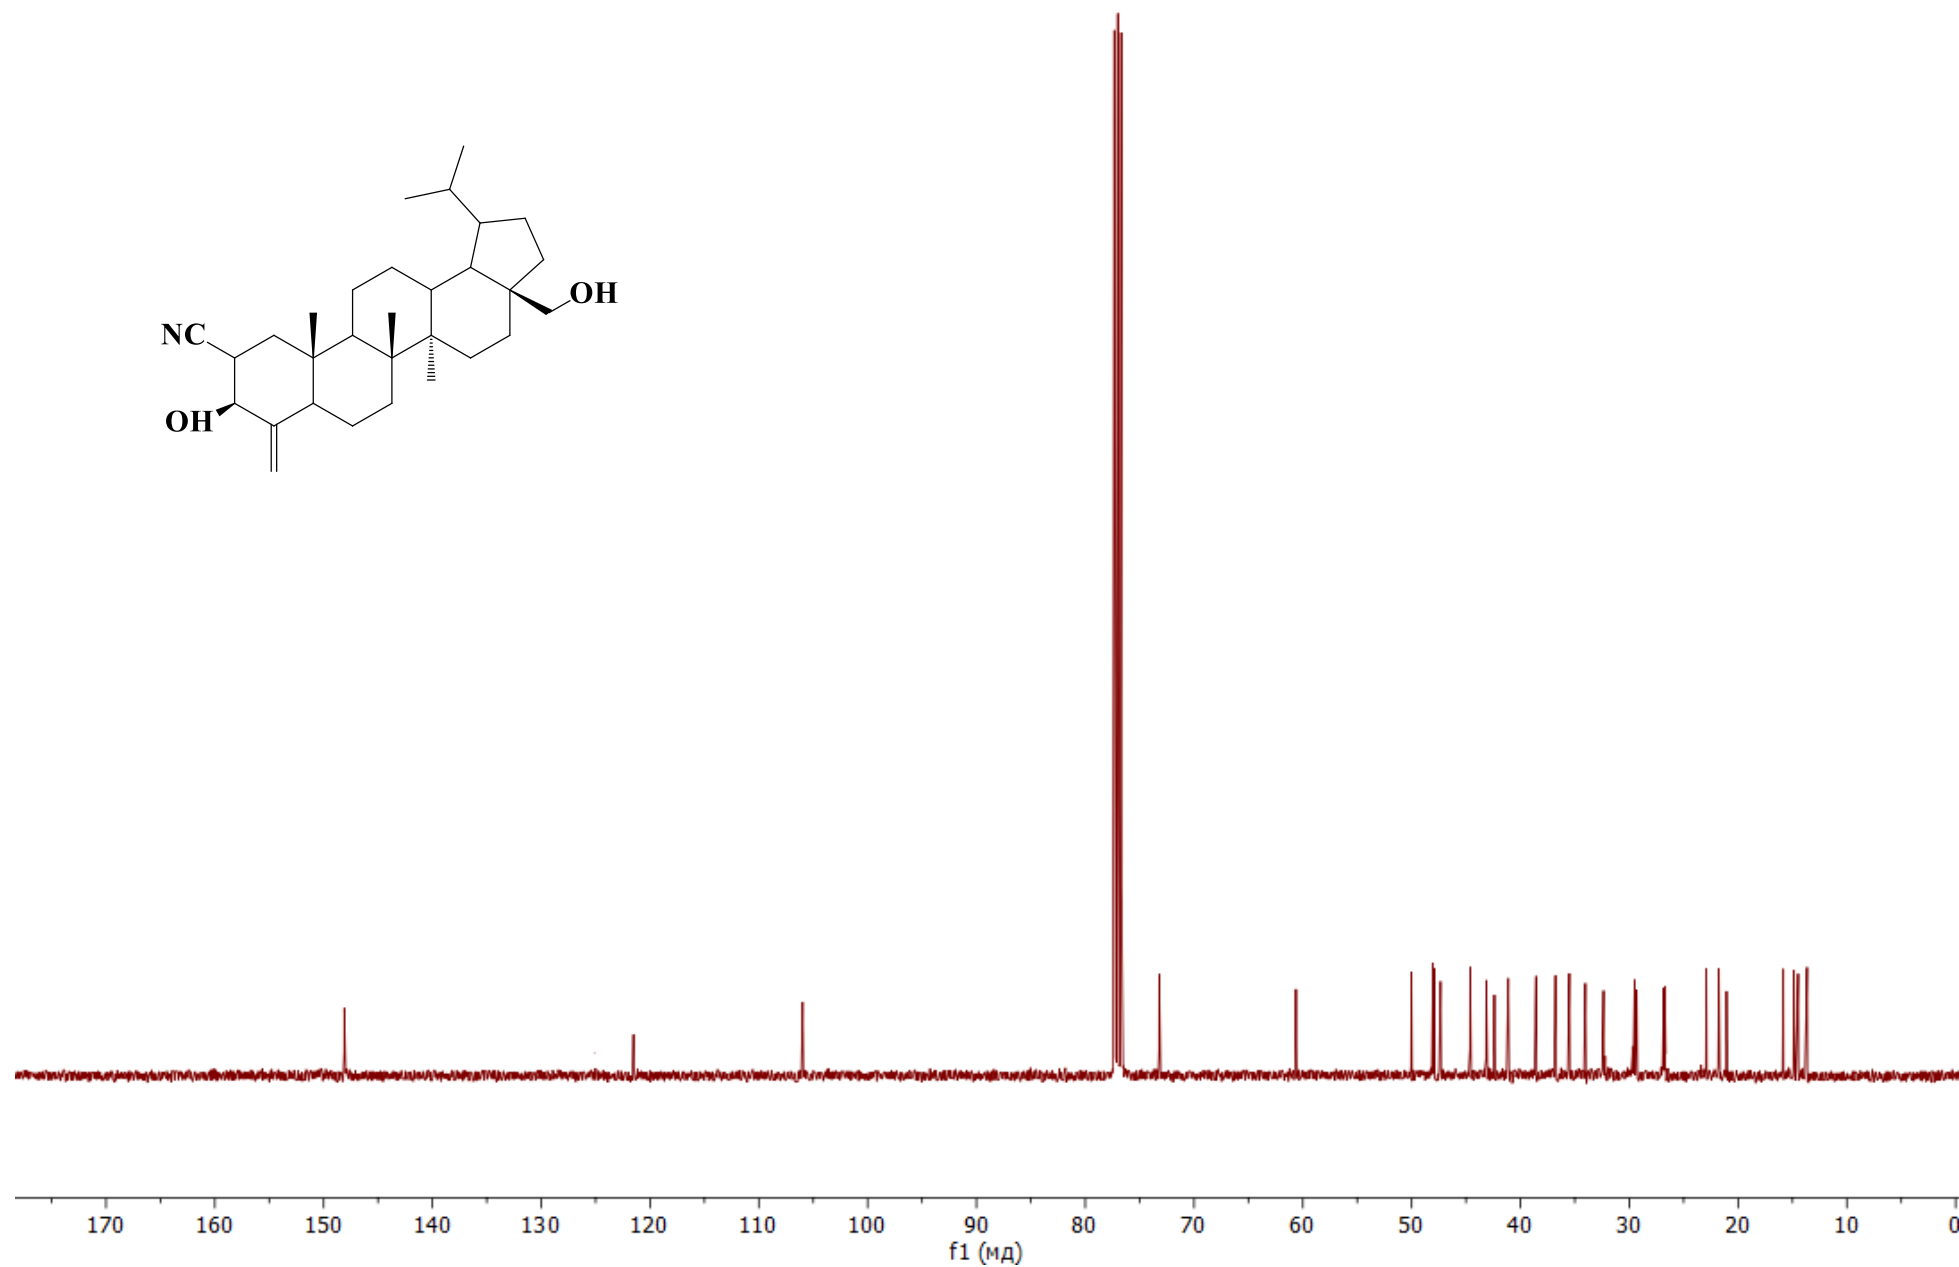



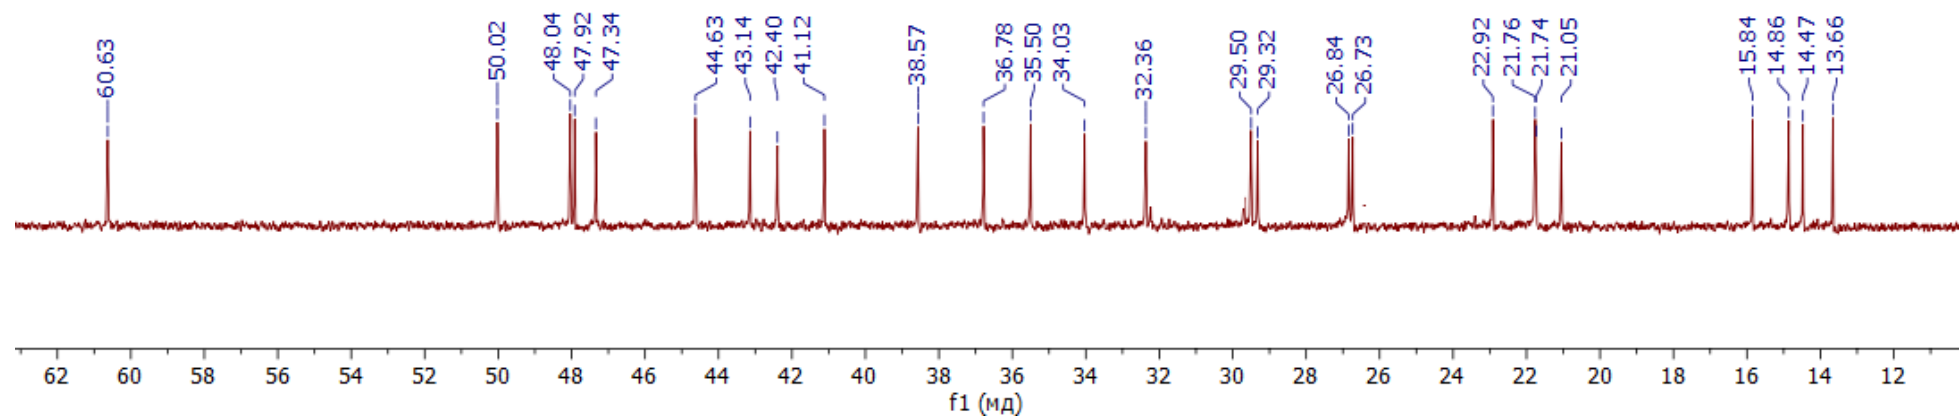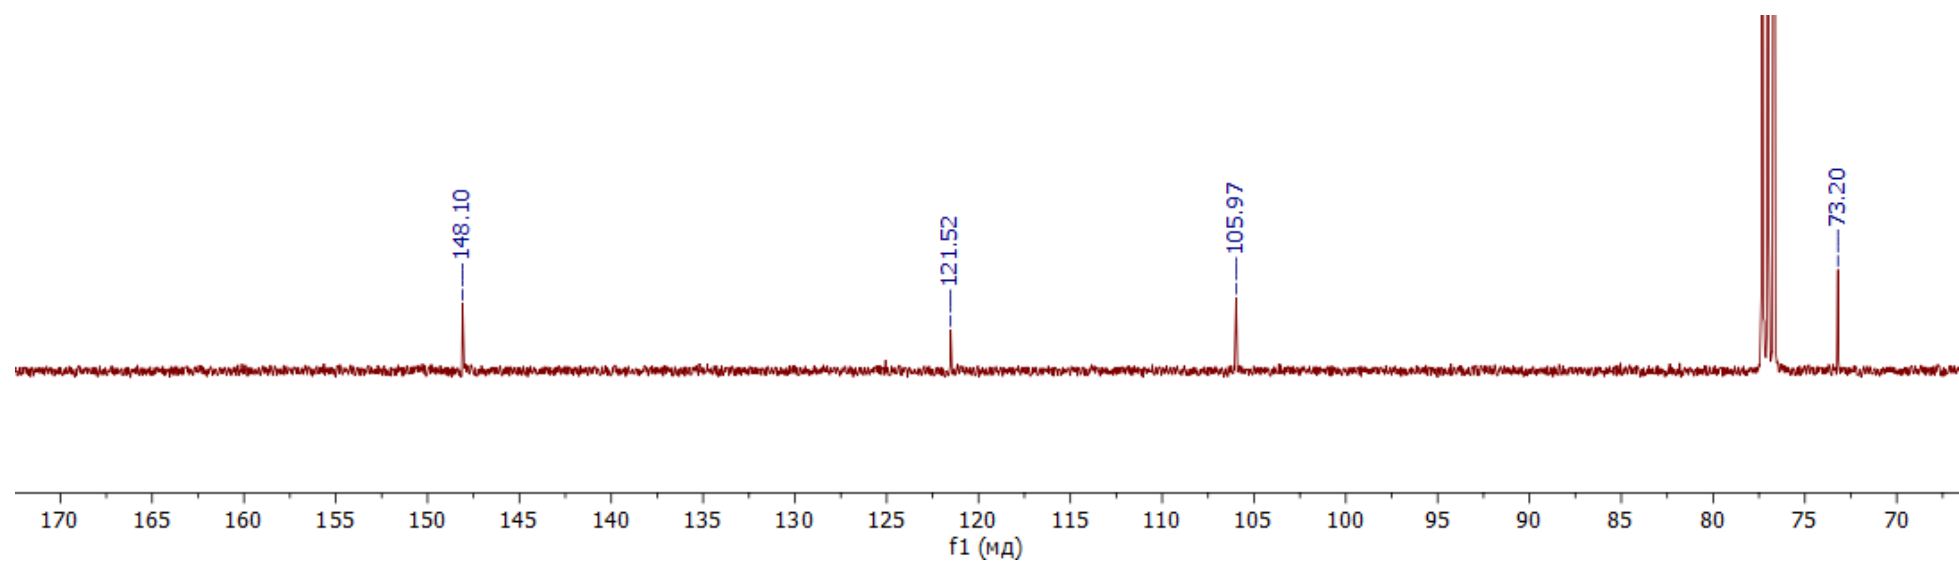

<sup>1</sup>H NMR spectra of 2-Cyano-3-norlup-2(24),4(23)-diene-28-oic acid methyl ester (10).

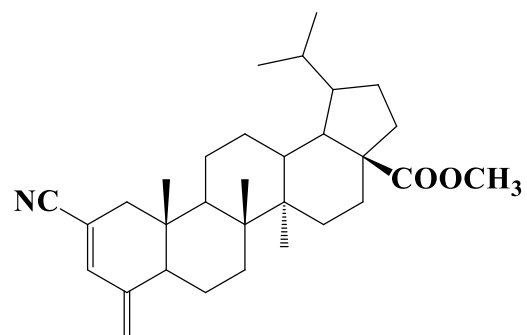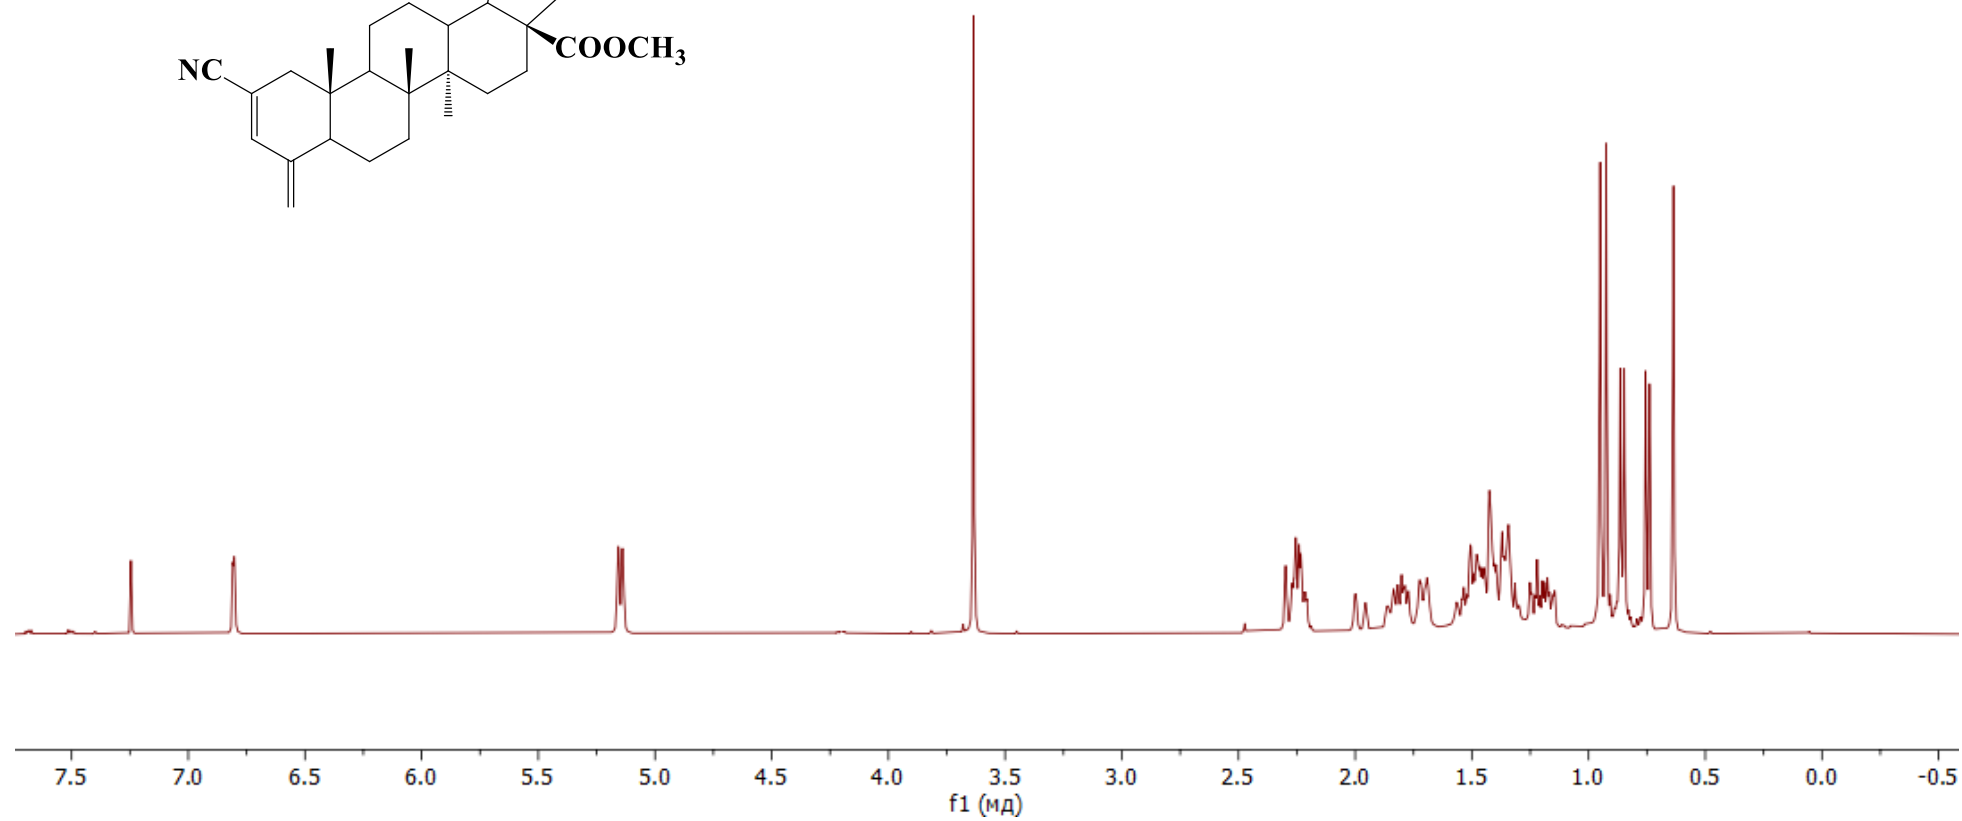

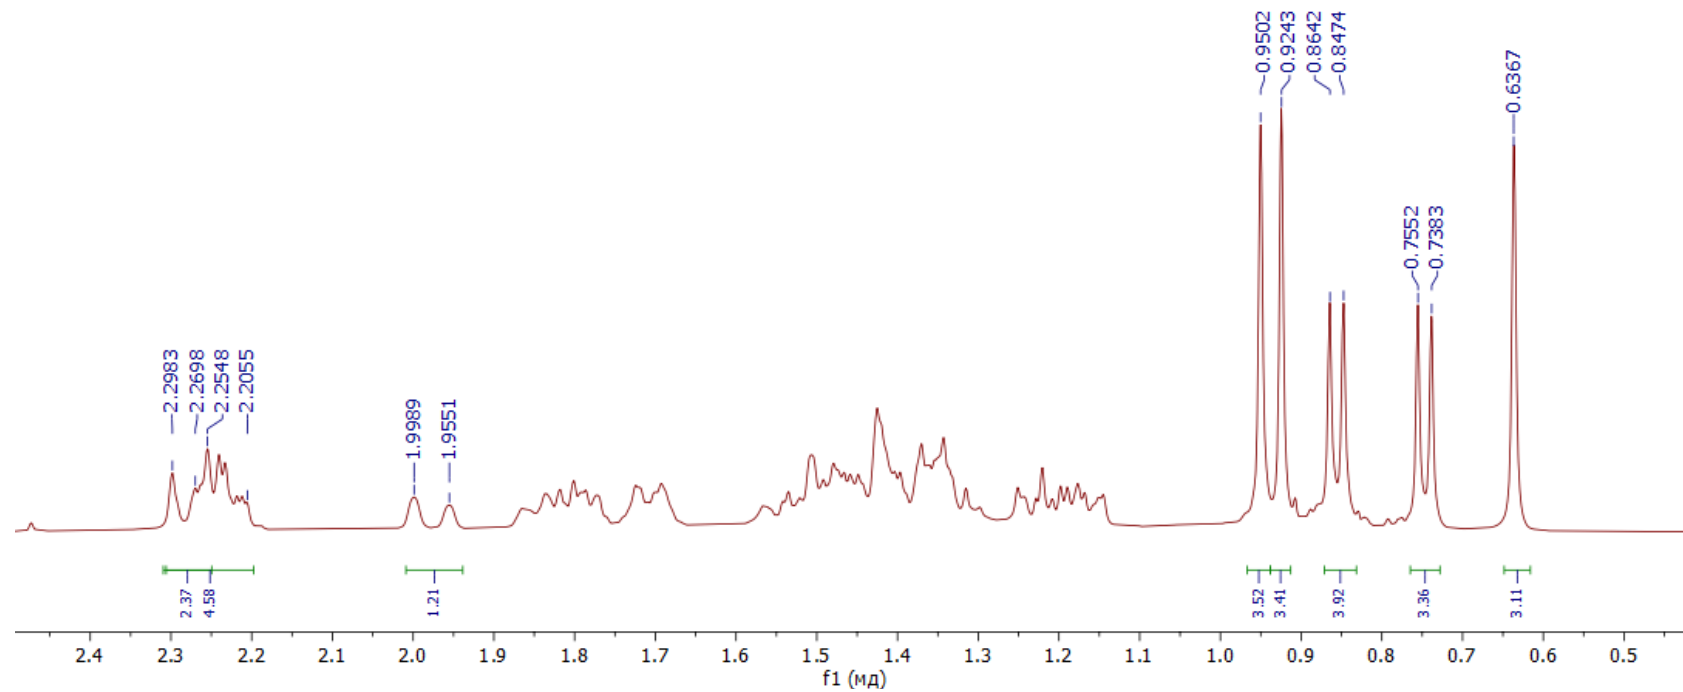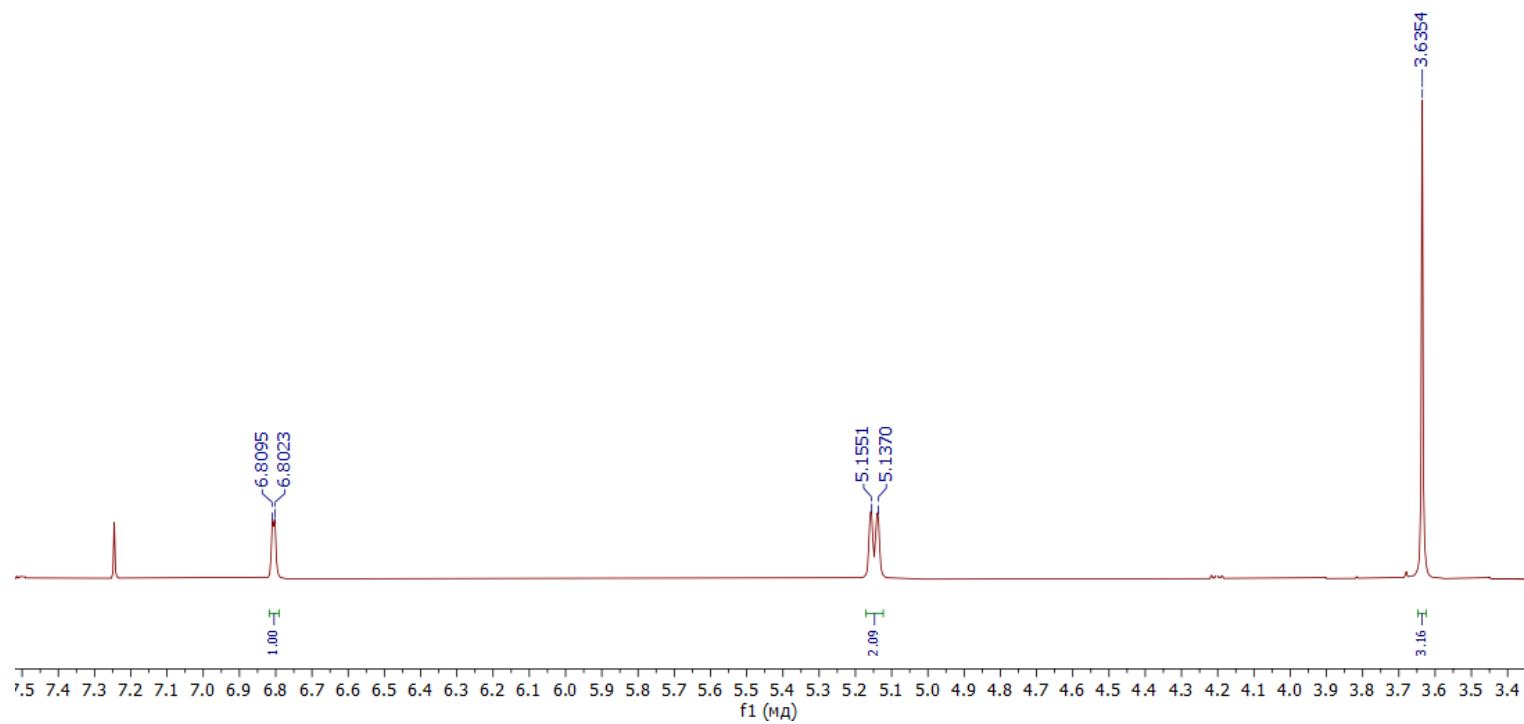

$^{13}\text{C}$  NMR spectra of 2-Cyano-3-norlup-2(24),4(23)-diene-28-oic acid methyl ester (10).

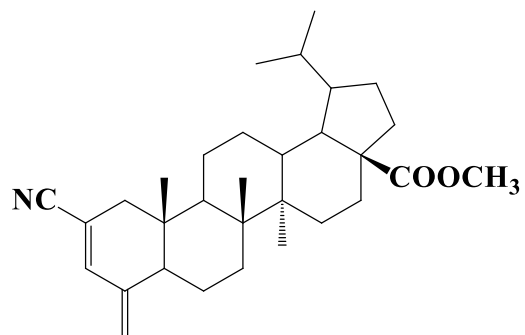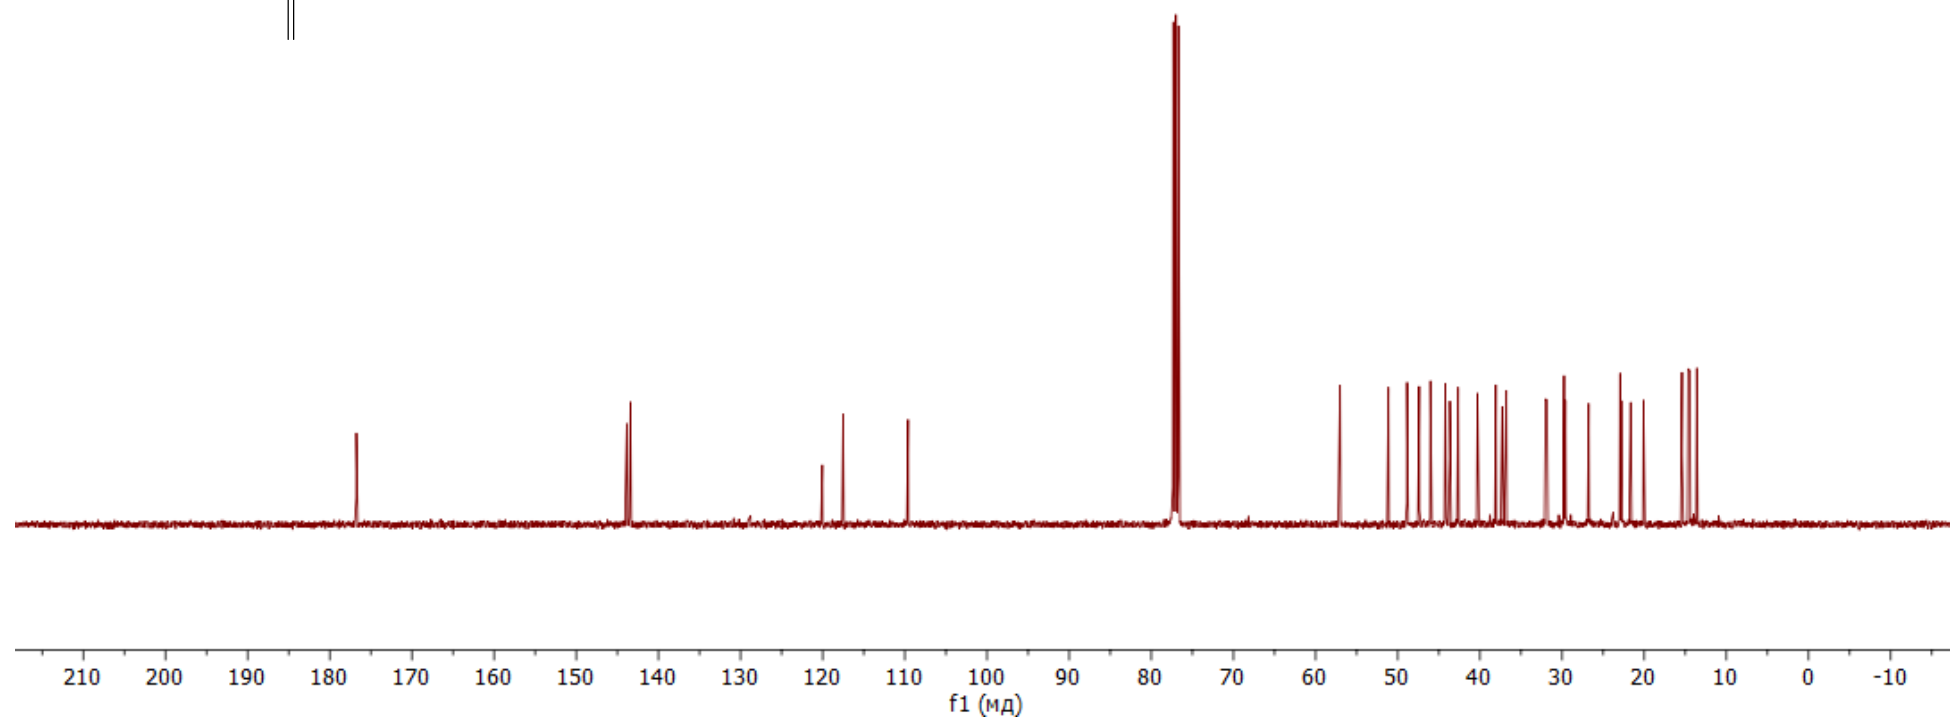

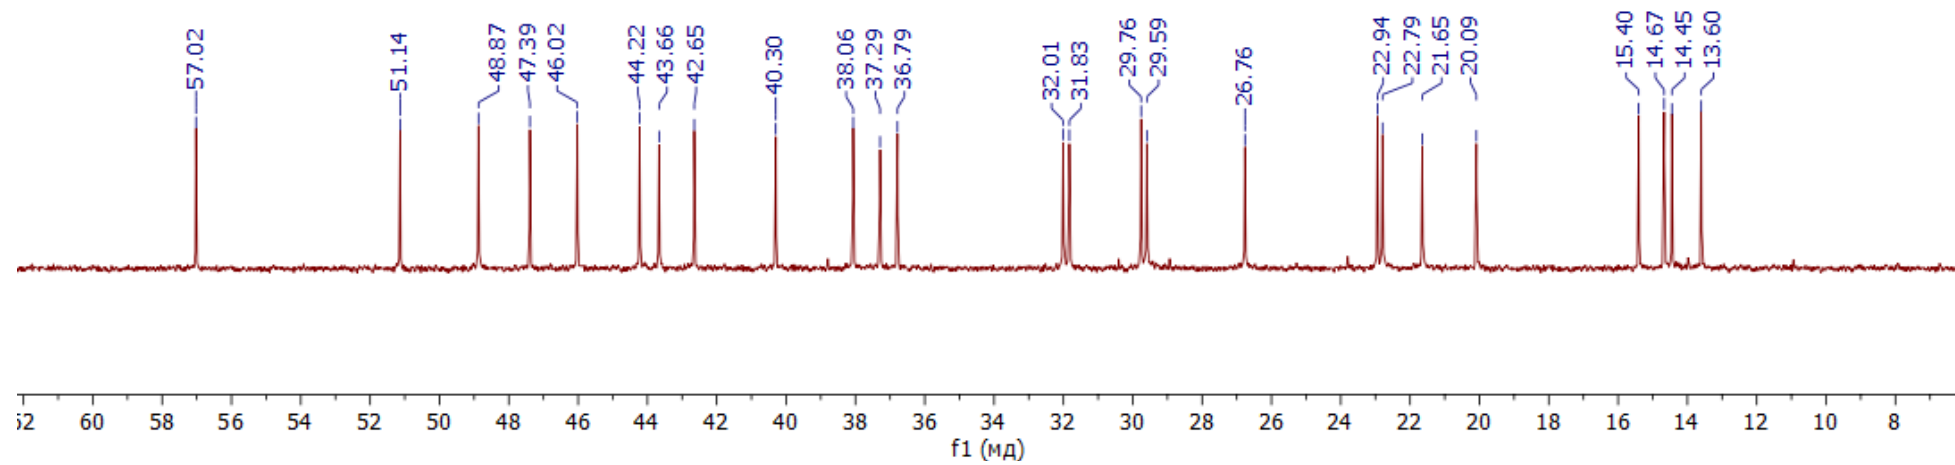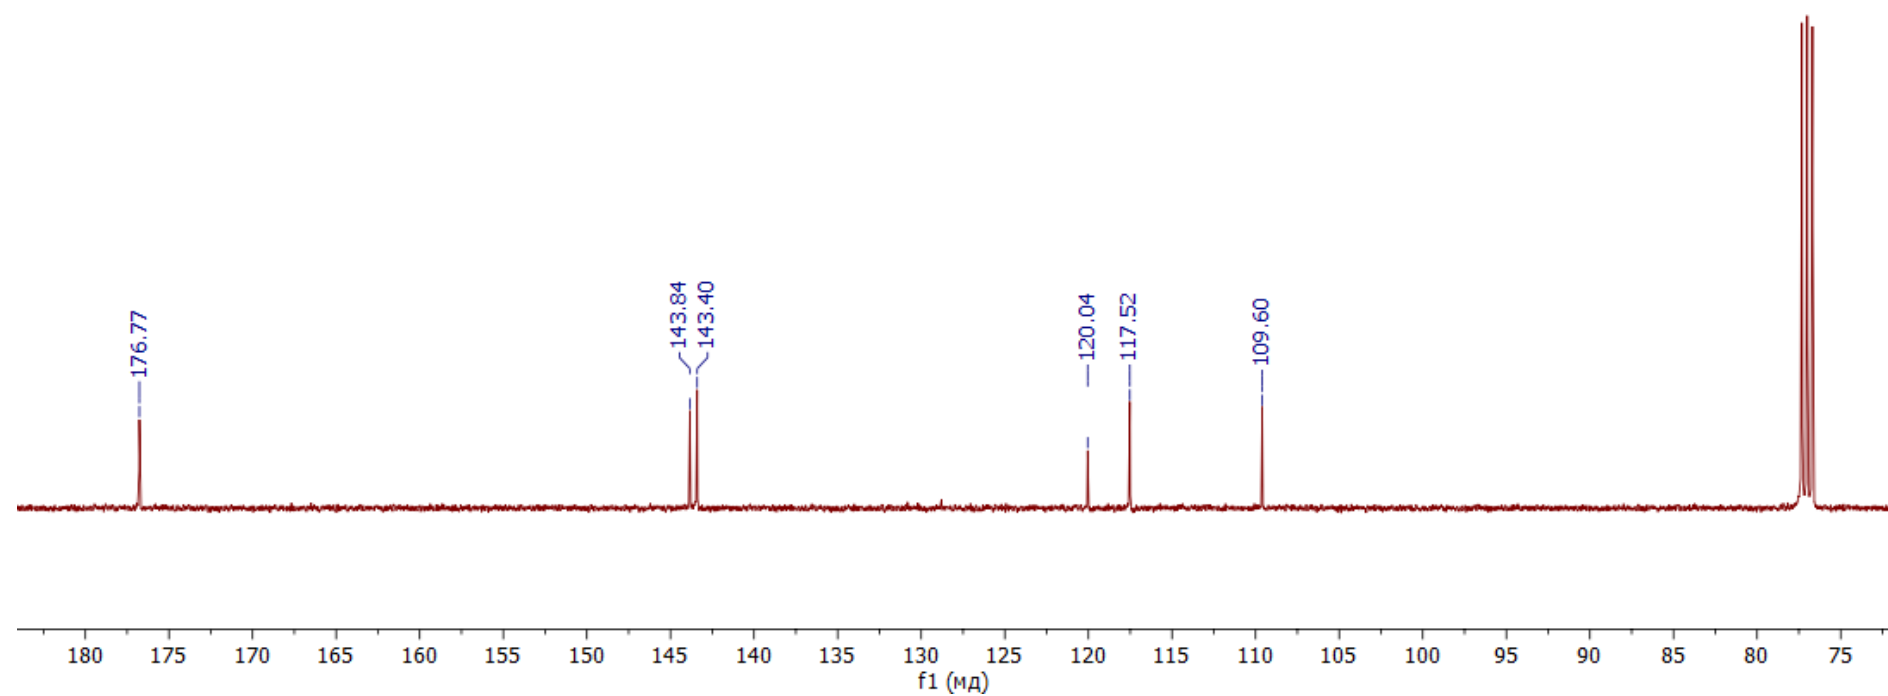

<sup>1</sup>H NMR spectra of 2-Cyano-24-hydroxy-3-norlup-4(23)-en-28-oic acid methyl ester (11).

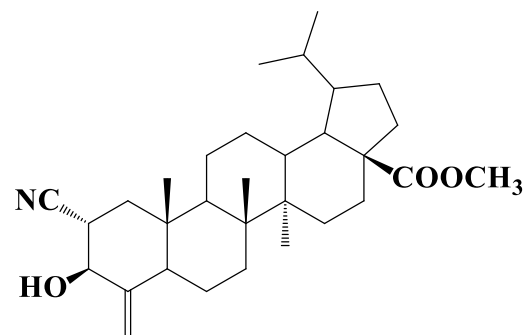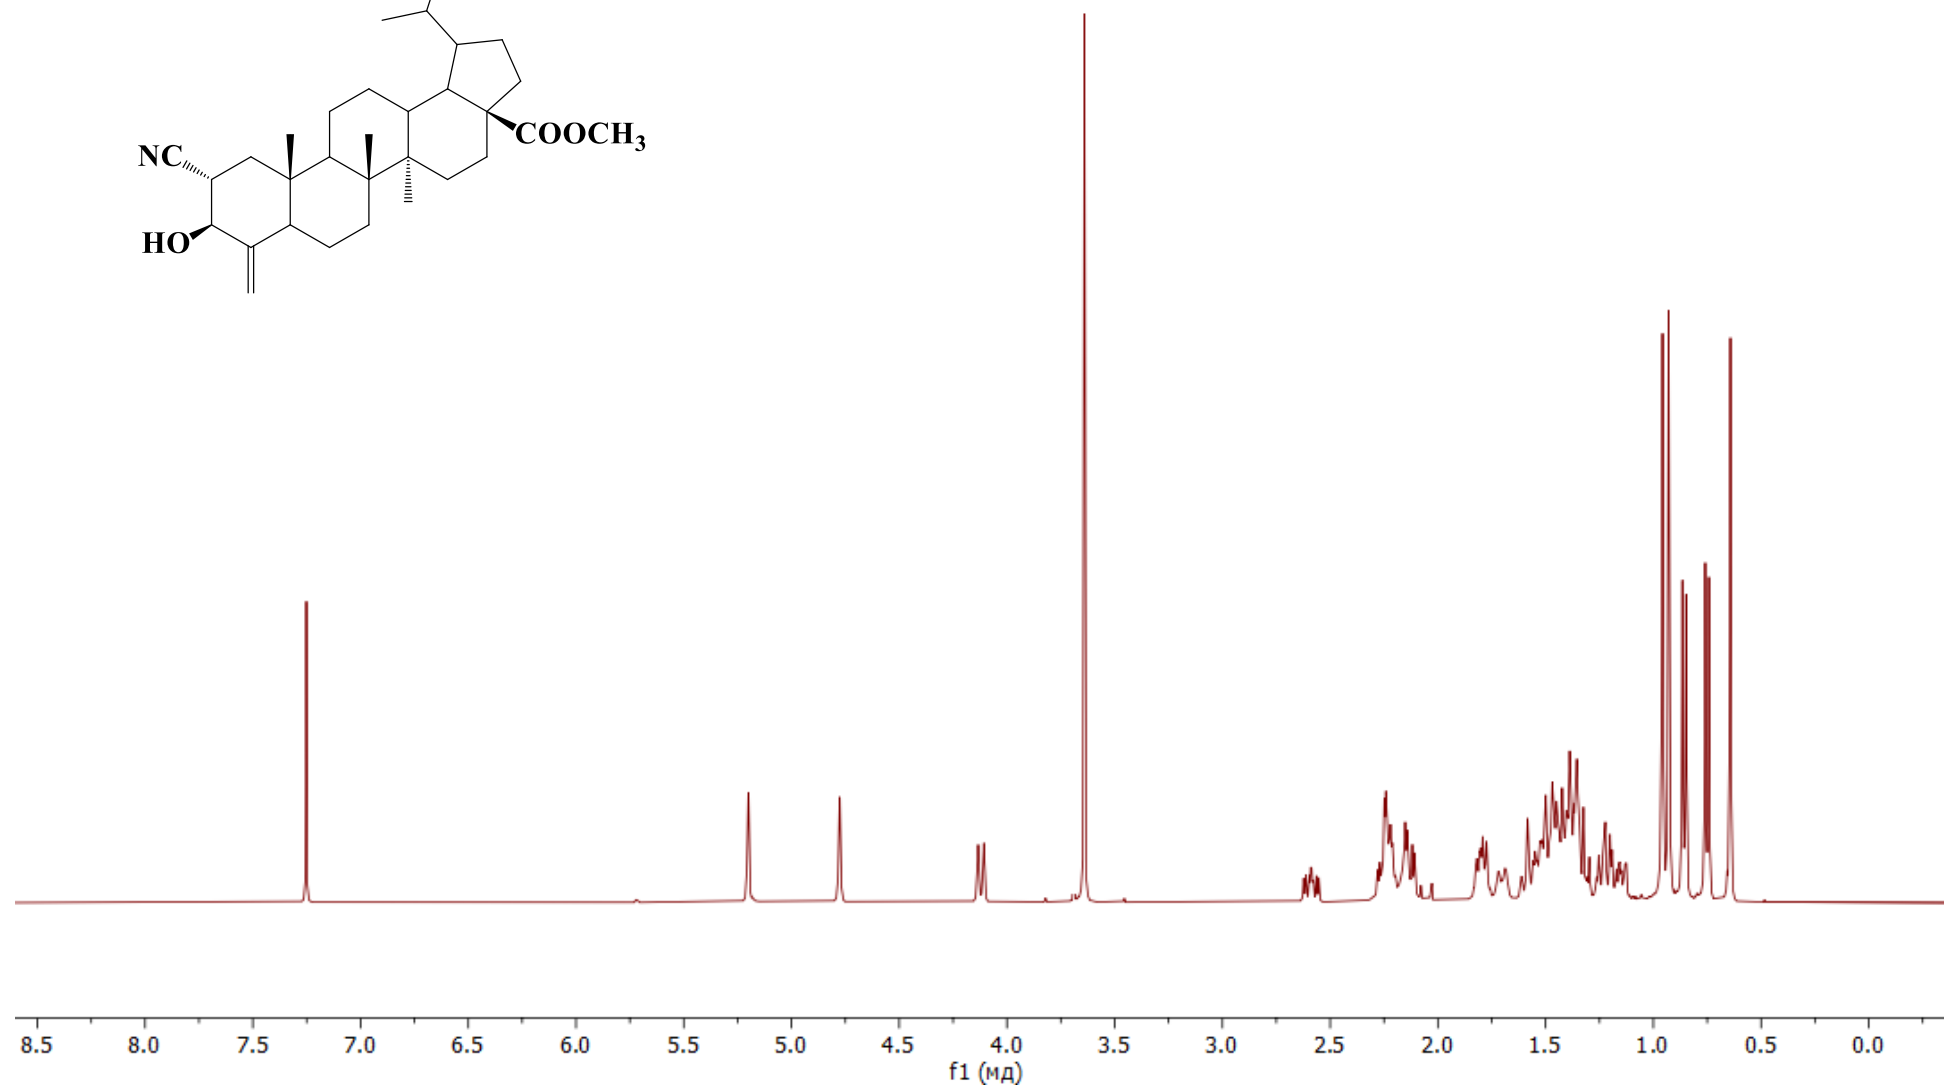

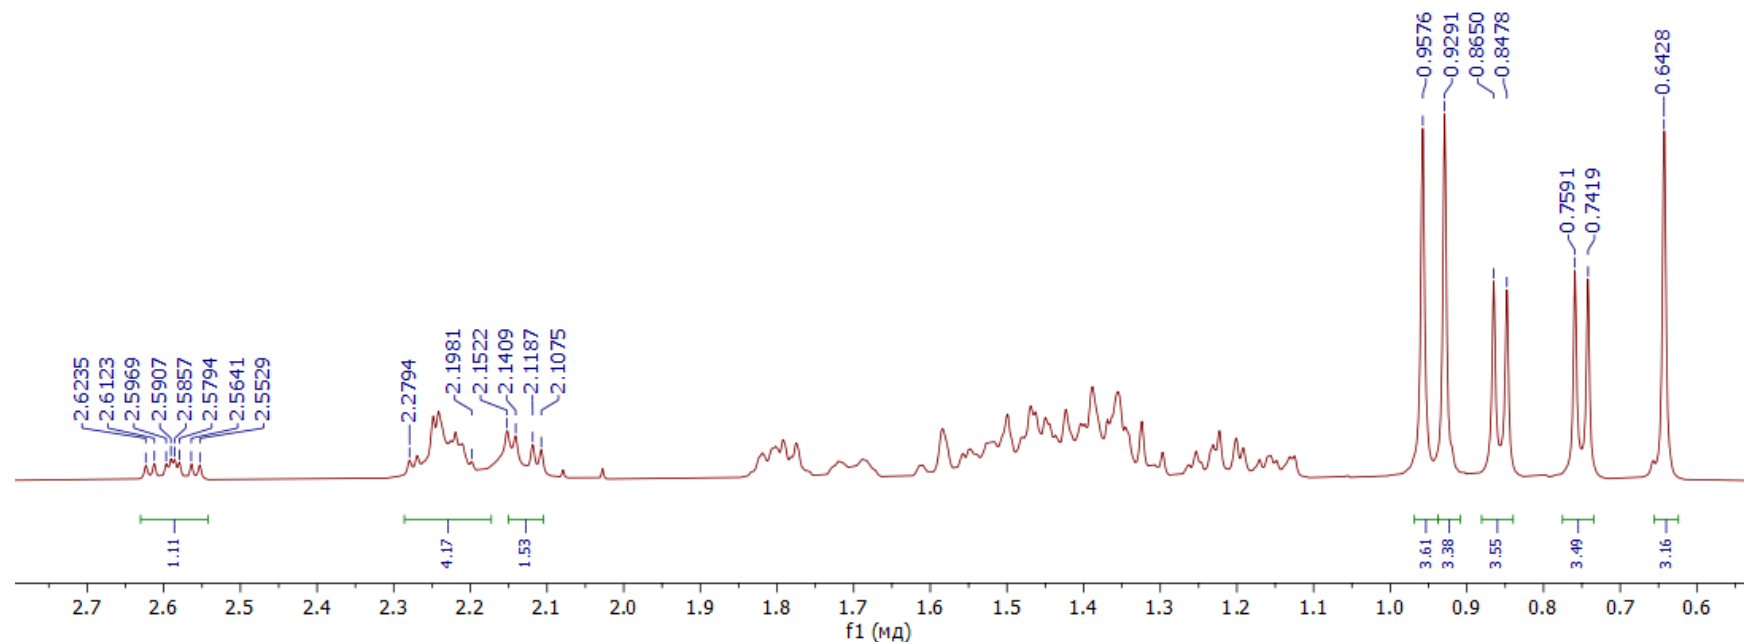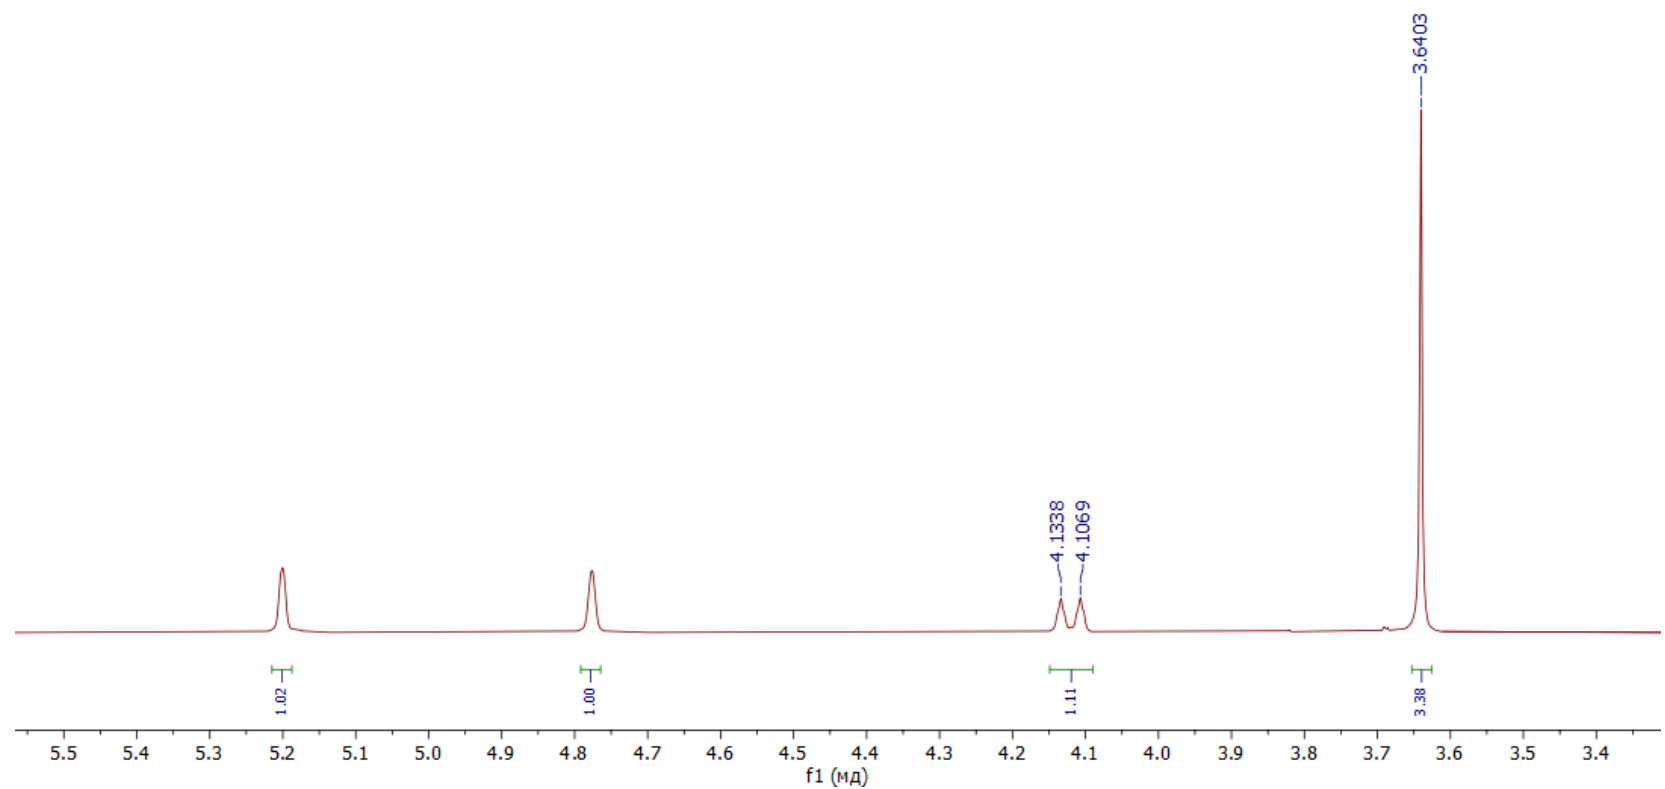

$^{13}\text{C}$  NMR spectra of 2-Cyano-24-hydroxy-3-norlup-4(23)-en-28-oic acid methyl ester (11).

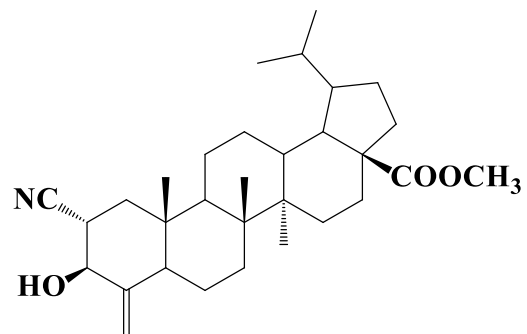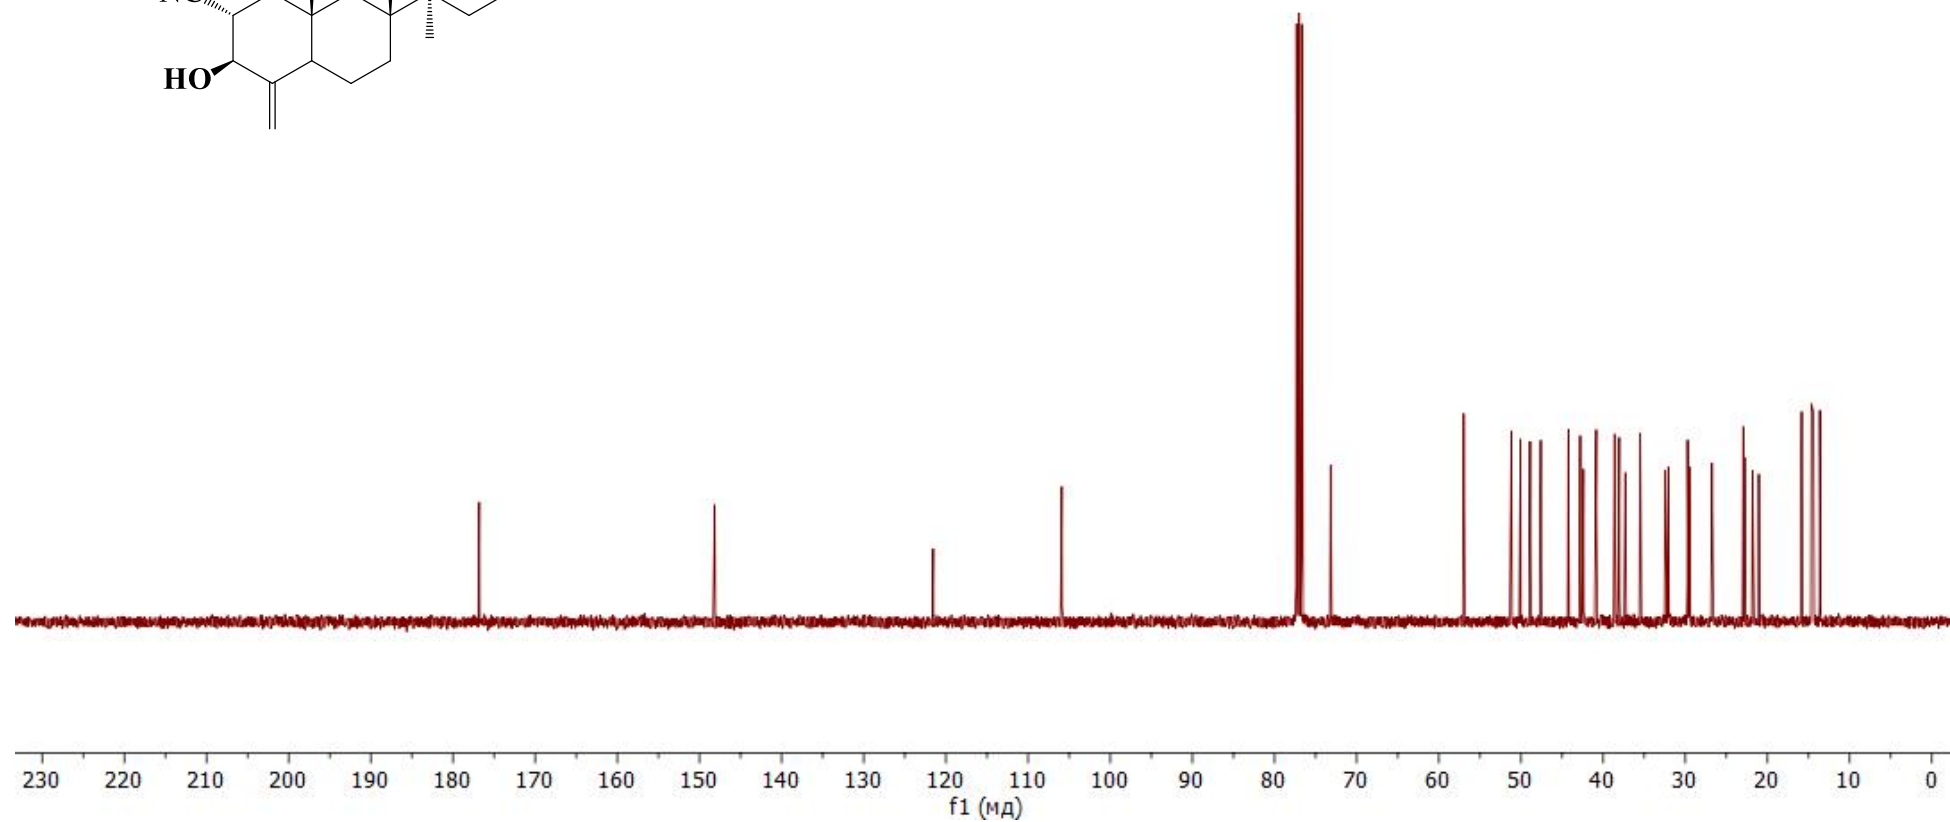



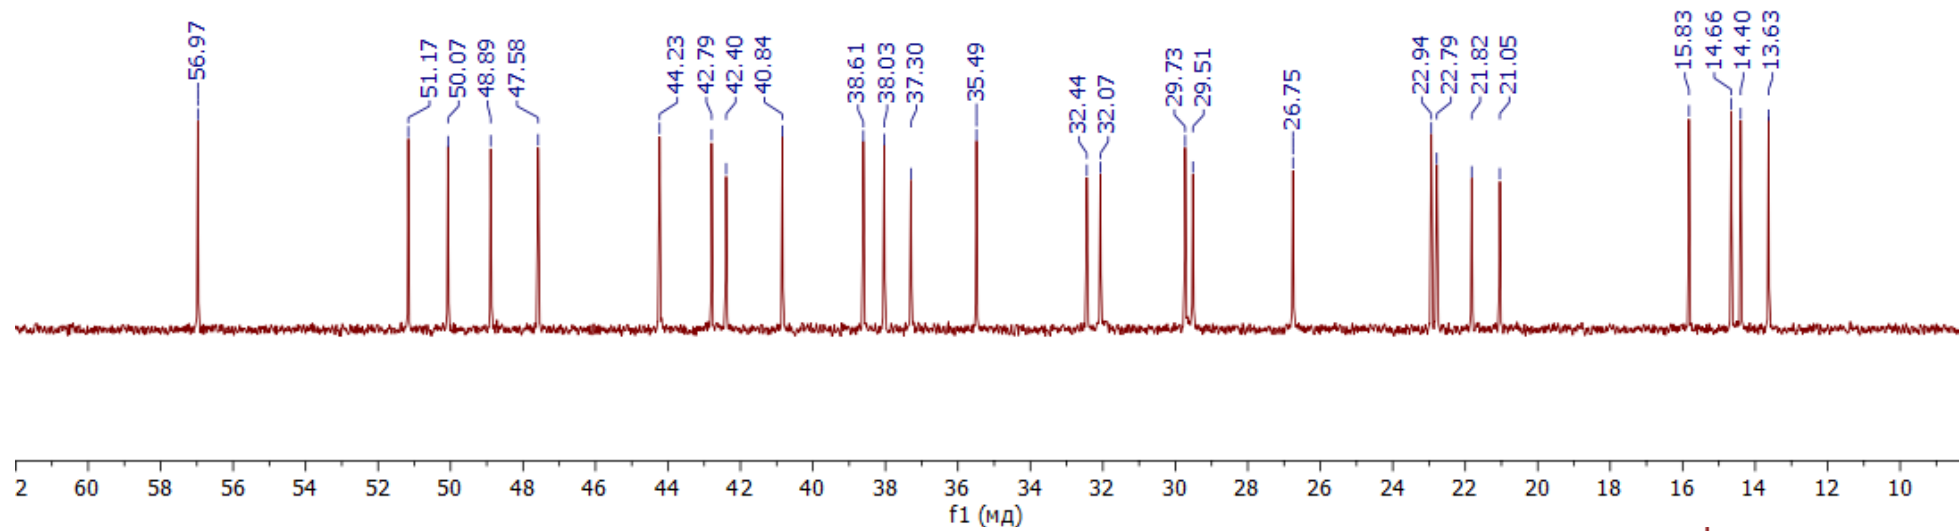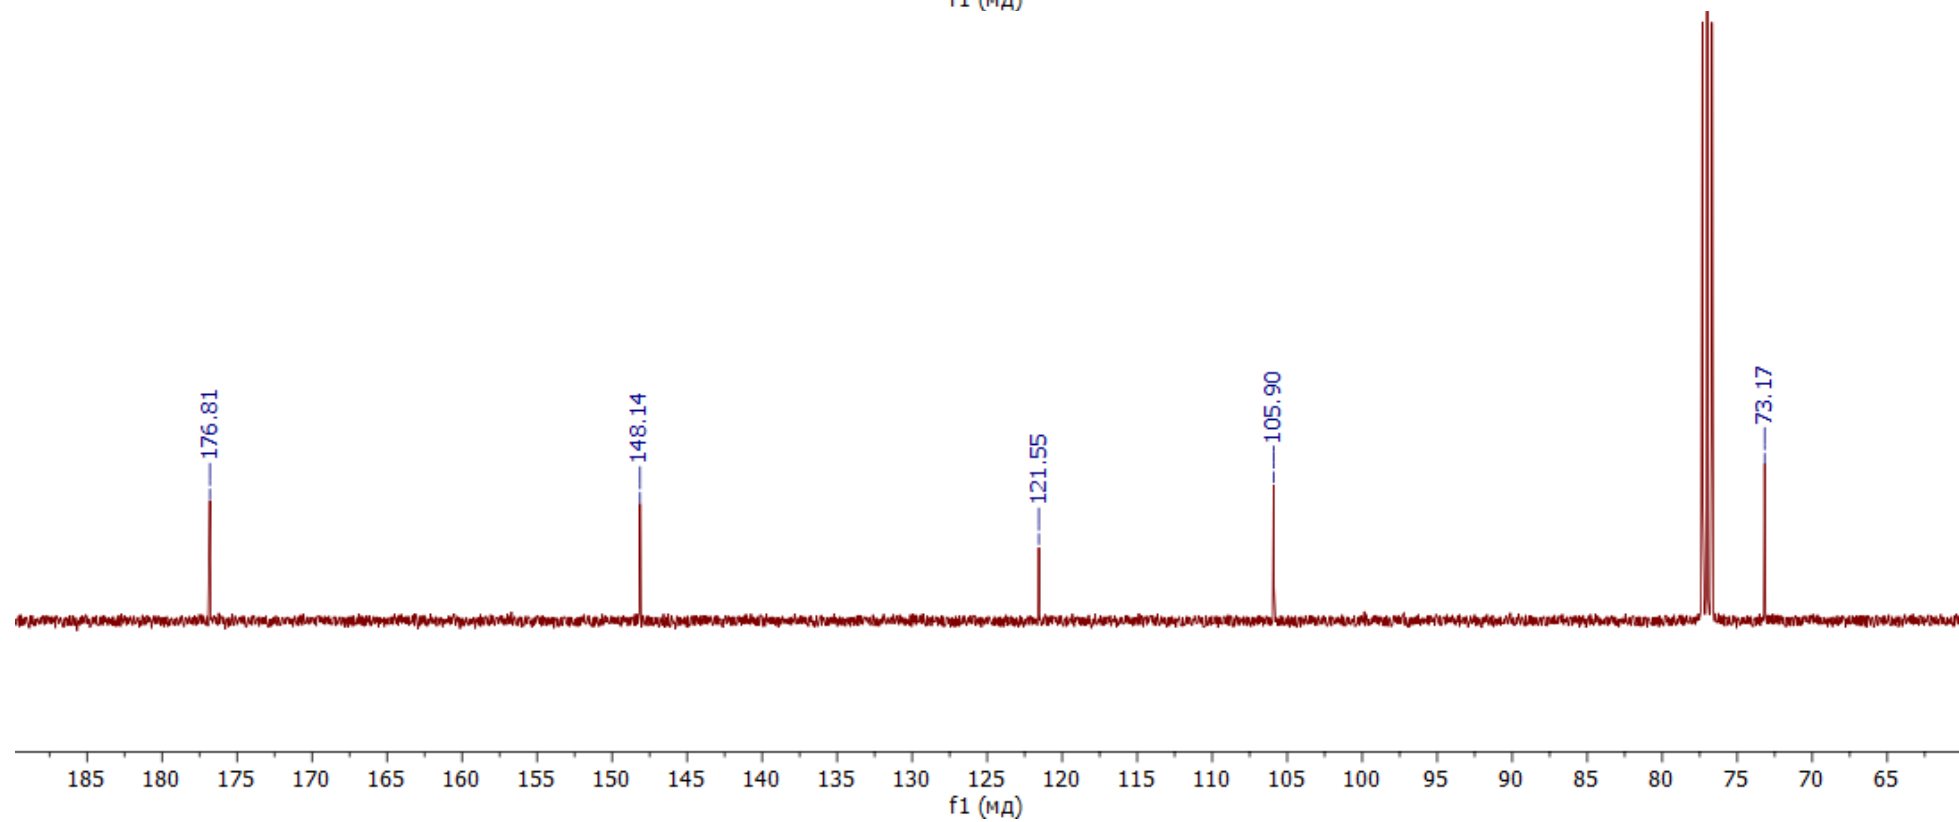

COSY NMR spectra of 2-Cyano-24-hydroxy-3-norlup-4(23)-en-28-oic acid methyl ester (11)

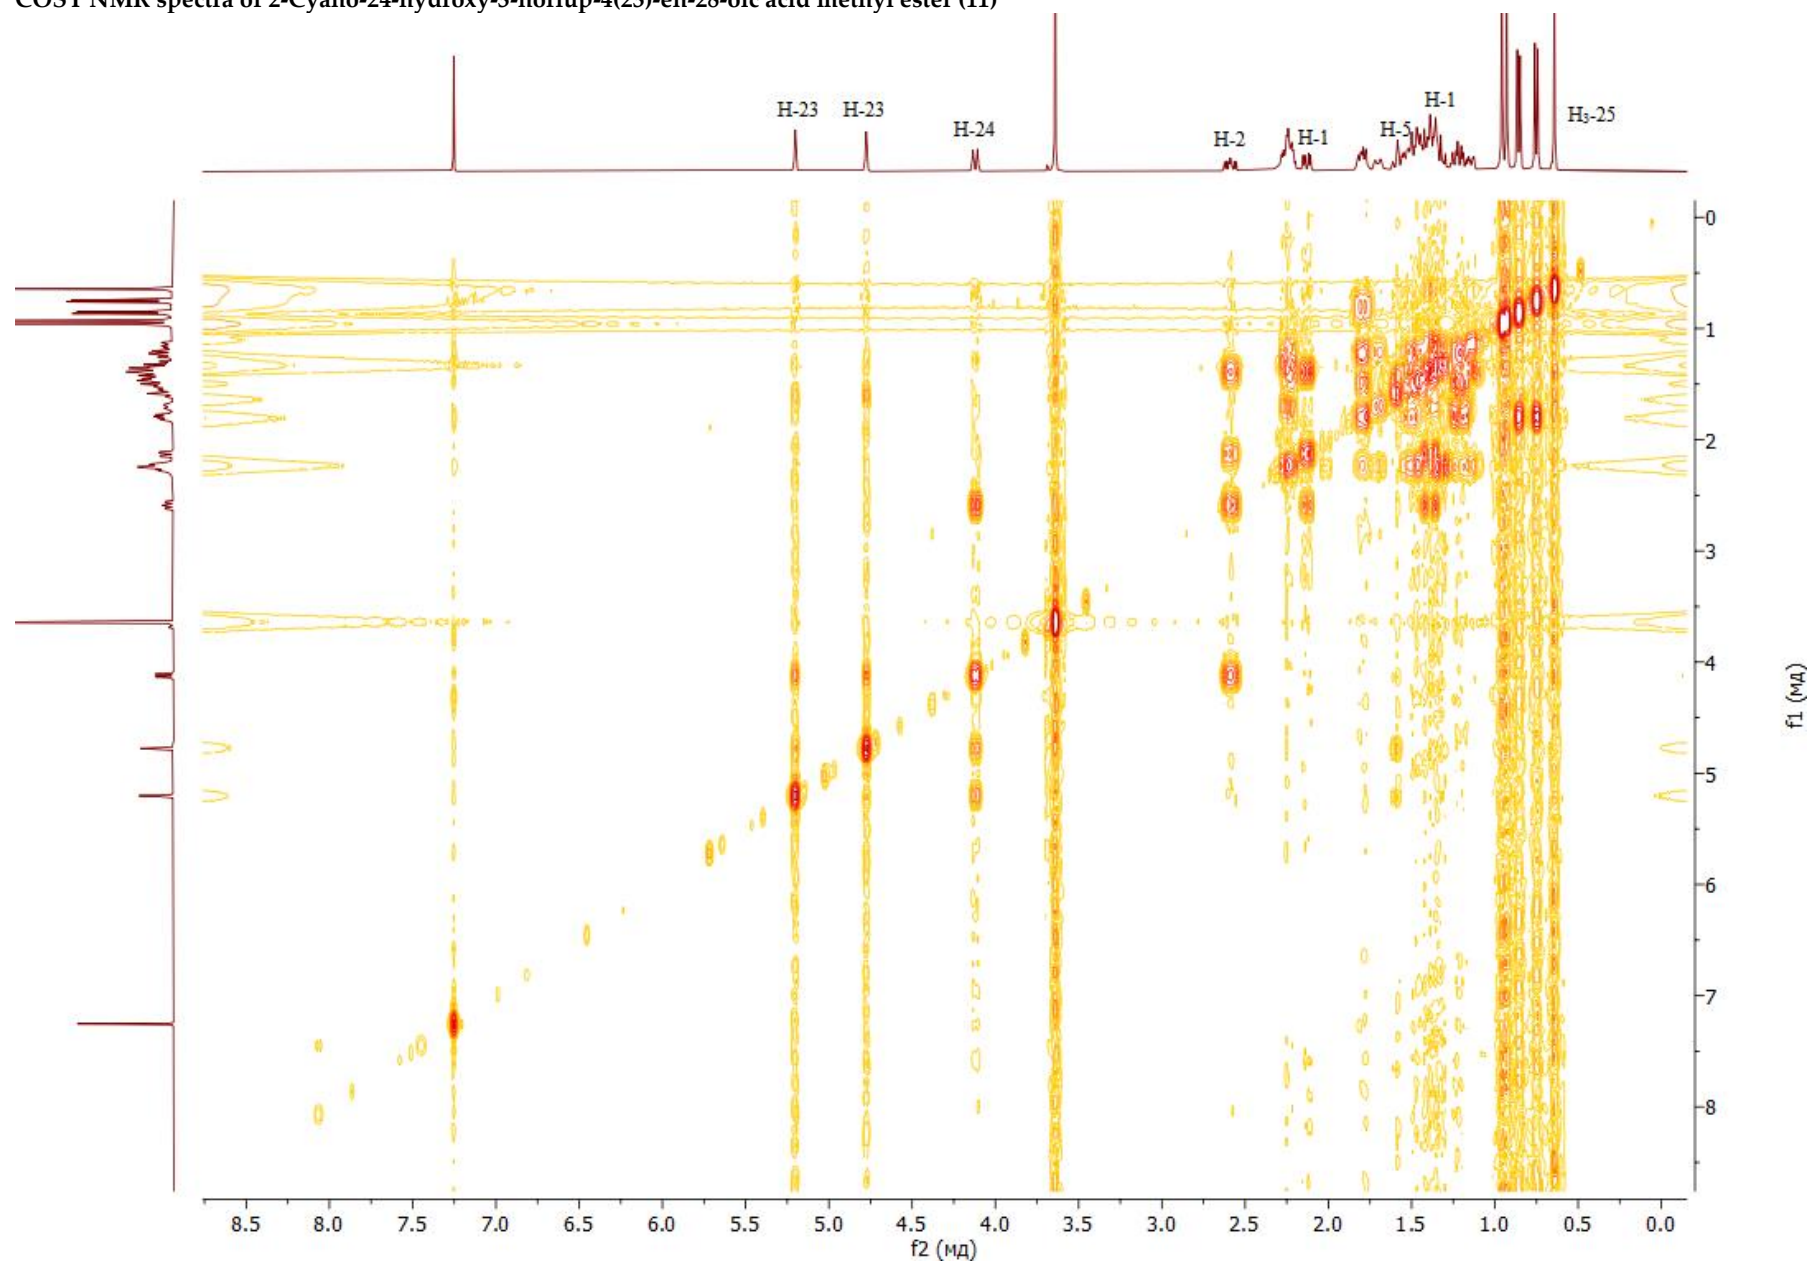

HSQC NMR spectra of 2-Cyano-24-hydroxy-3-norlup-4(23)-en-28-oic acid methyl ester (11)

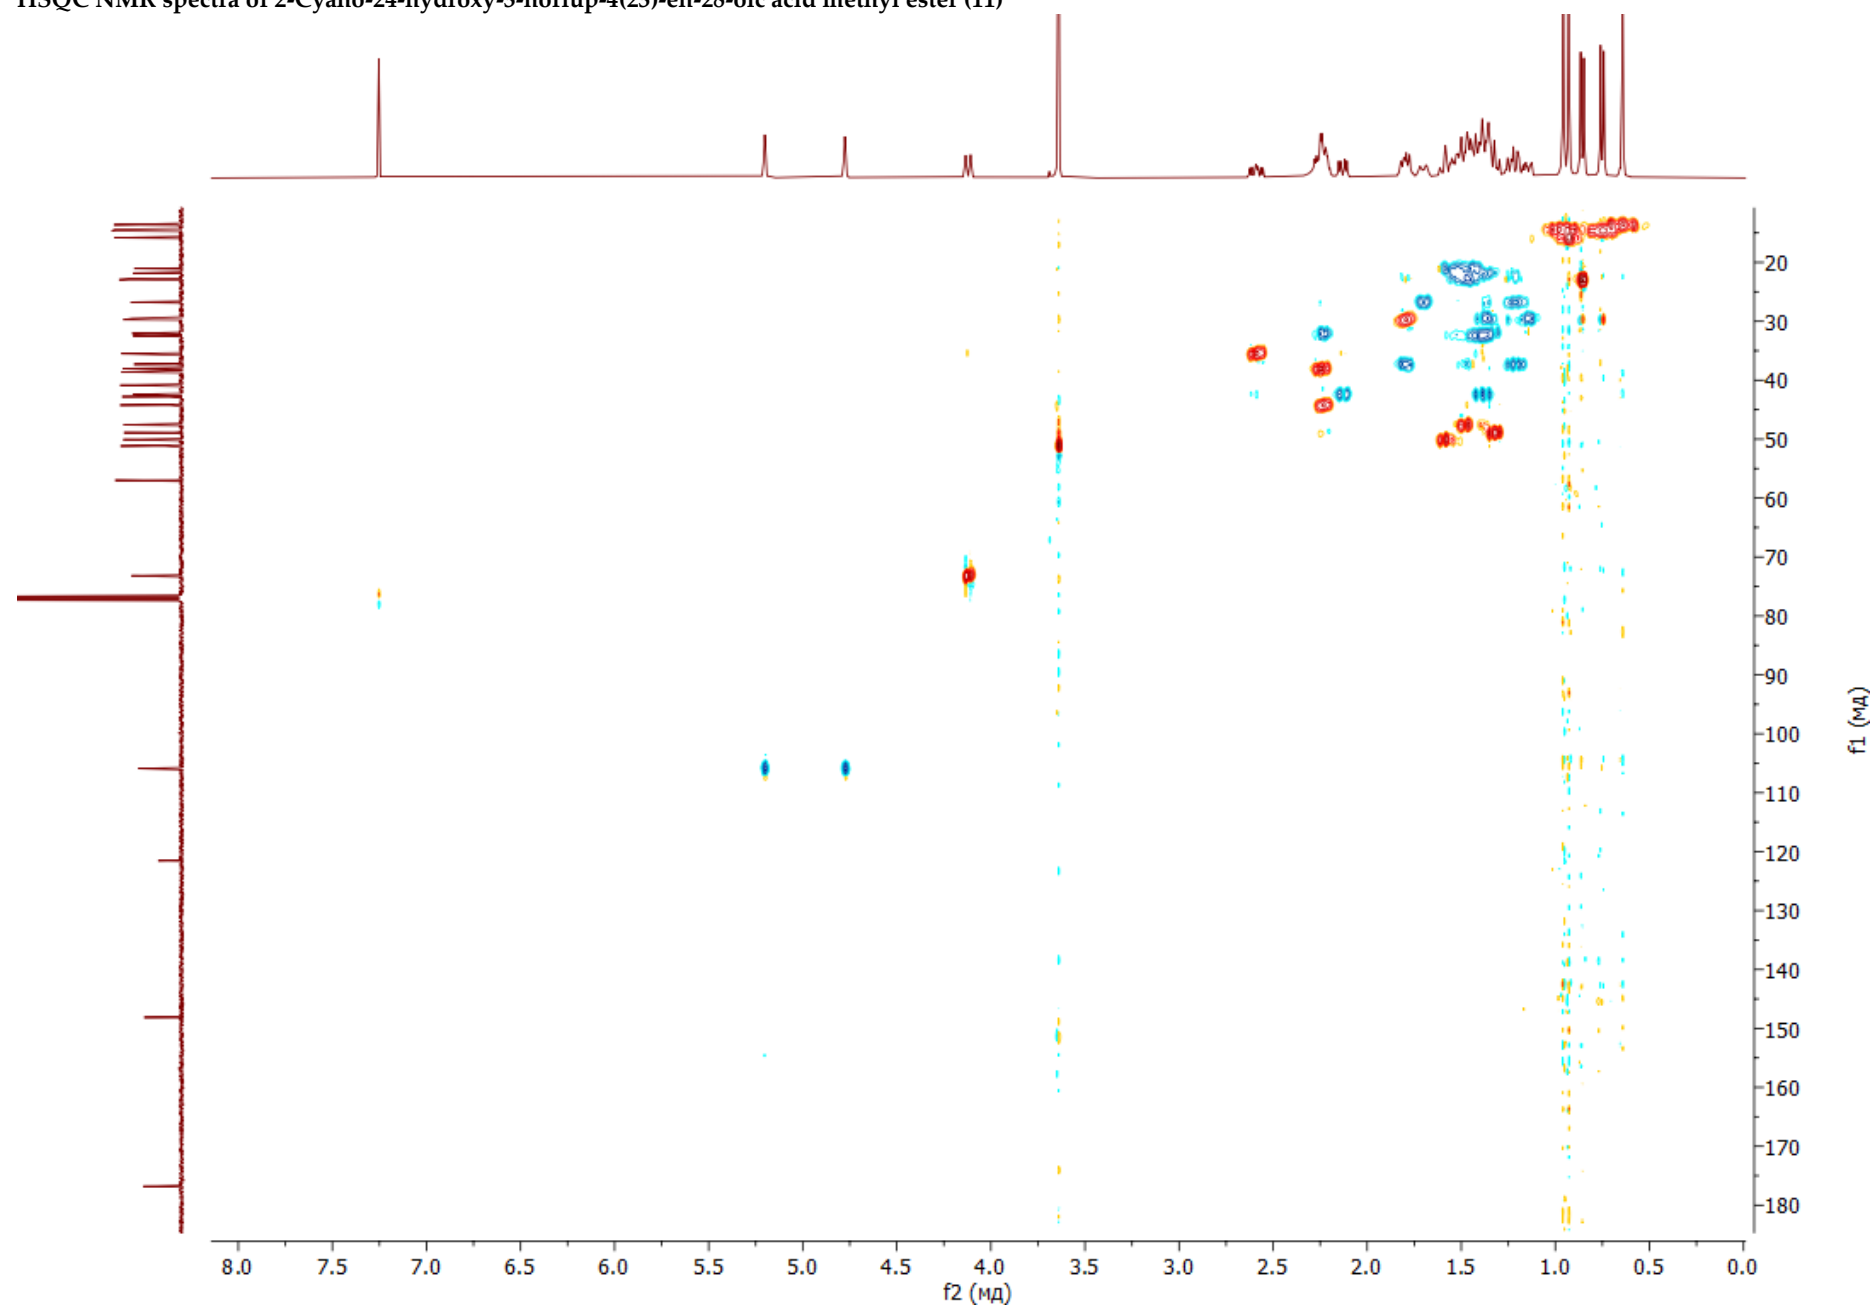

HSQC NMR spectra of 2-Cyano-24-hydroxy-3-norlup-4(23)-en-28-oic acid methyl ester (11)

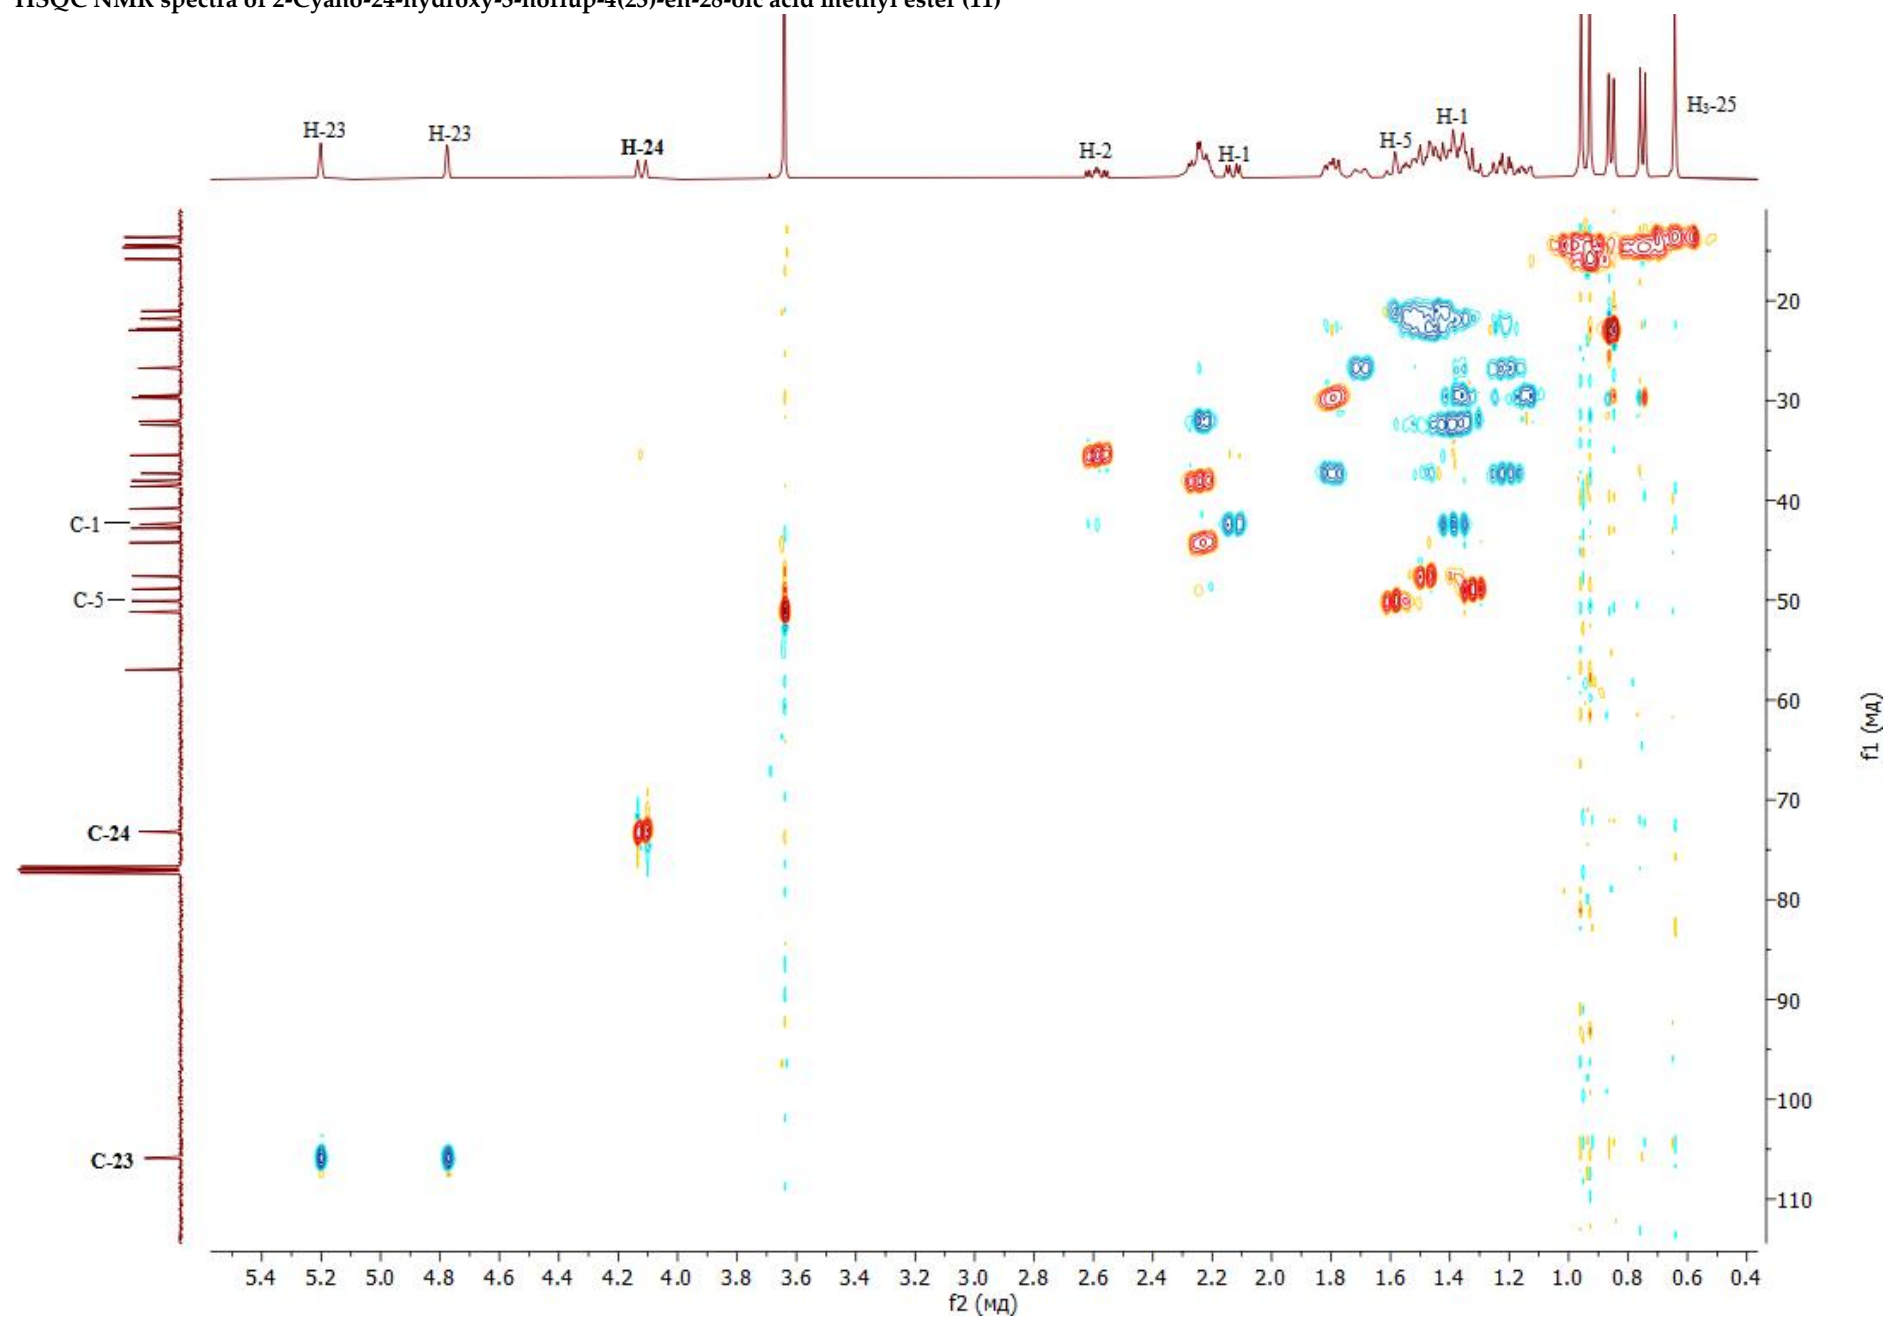

HMBC NMR spectra of 2-Cyano-24-hydroxy-3-norlup-4(23)-en-28-oic acid methyl ester (11)

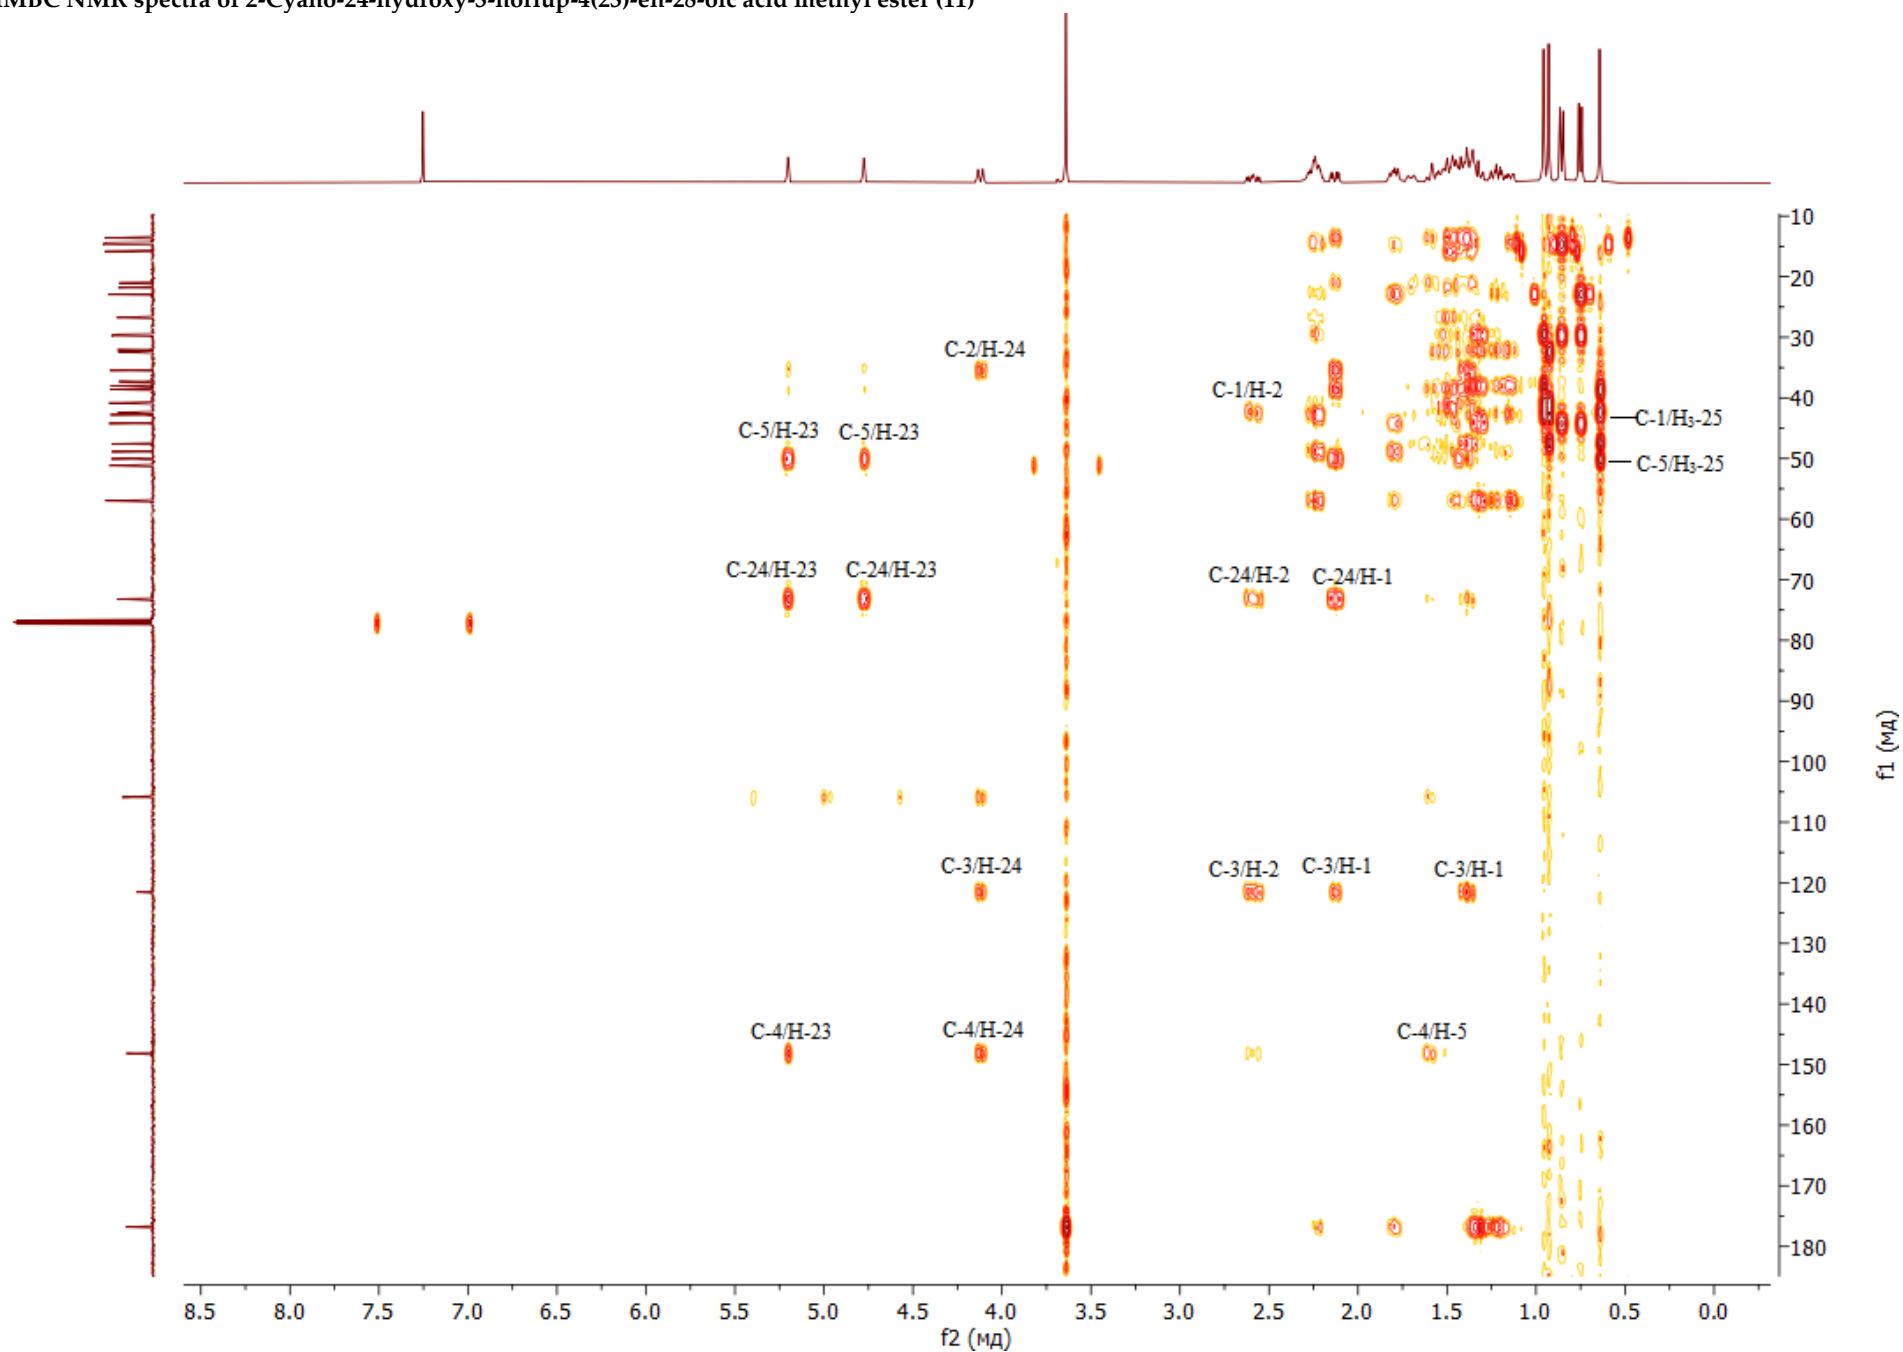

NOESY NMR spectra of 2-Cyano-24-hydroxy-3-norlup-4(23)-en-28-oic acid methyl ester (11)

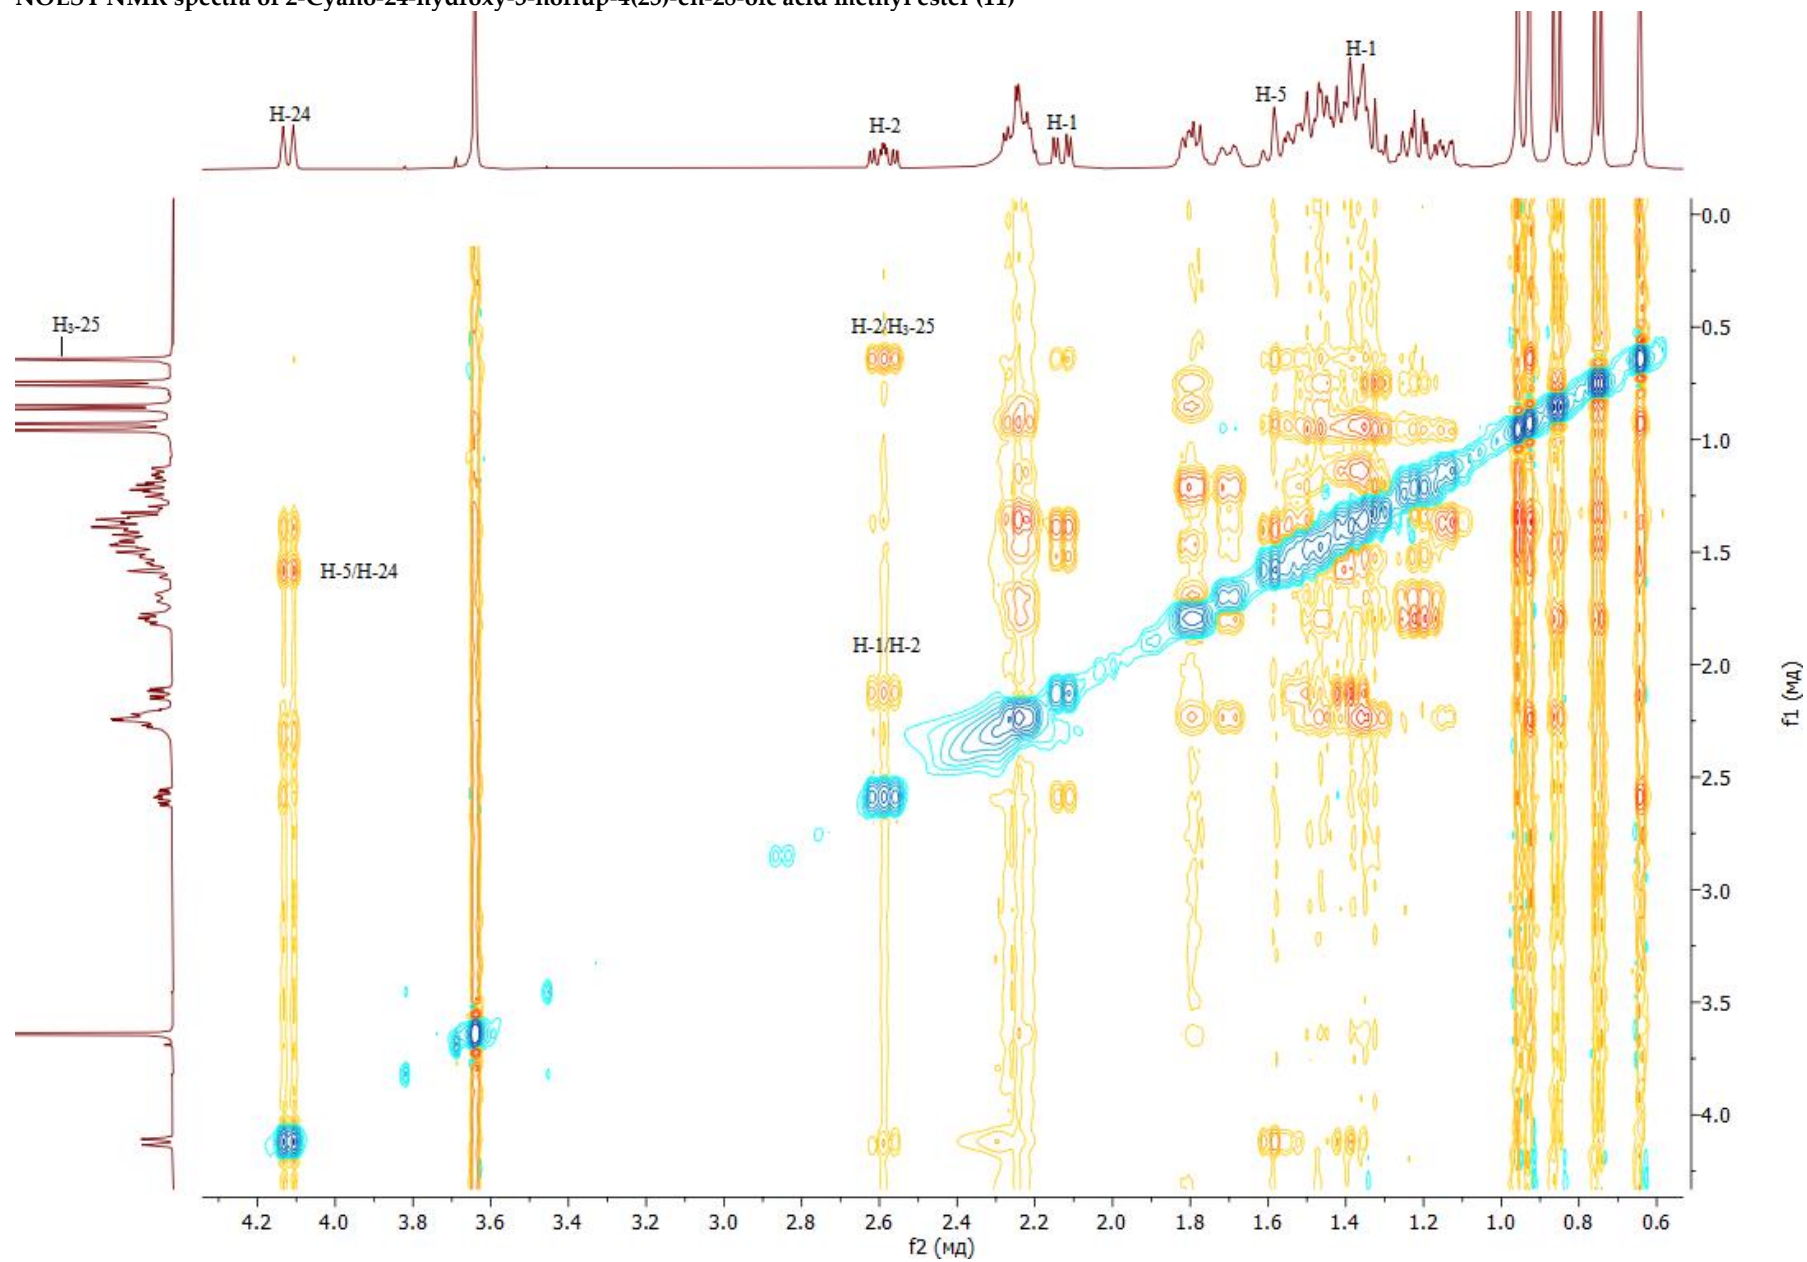

$^1\text{H}$  NMR spectra of 2-Cyano-28-hydroxy-3-norlup-4(23)-ene (12).

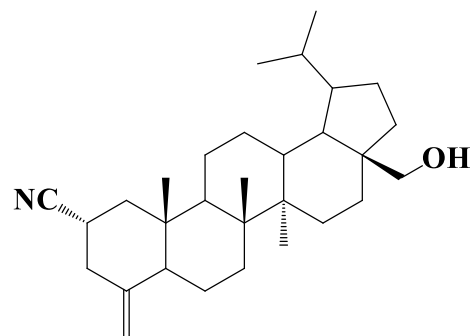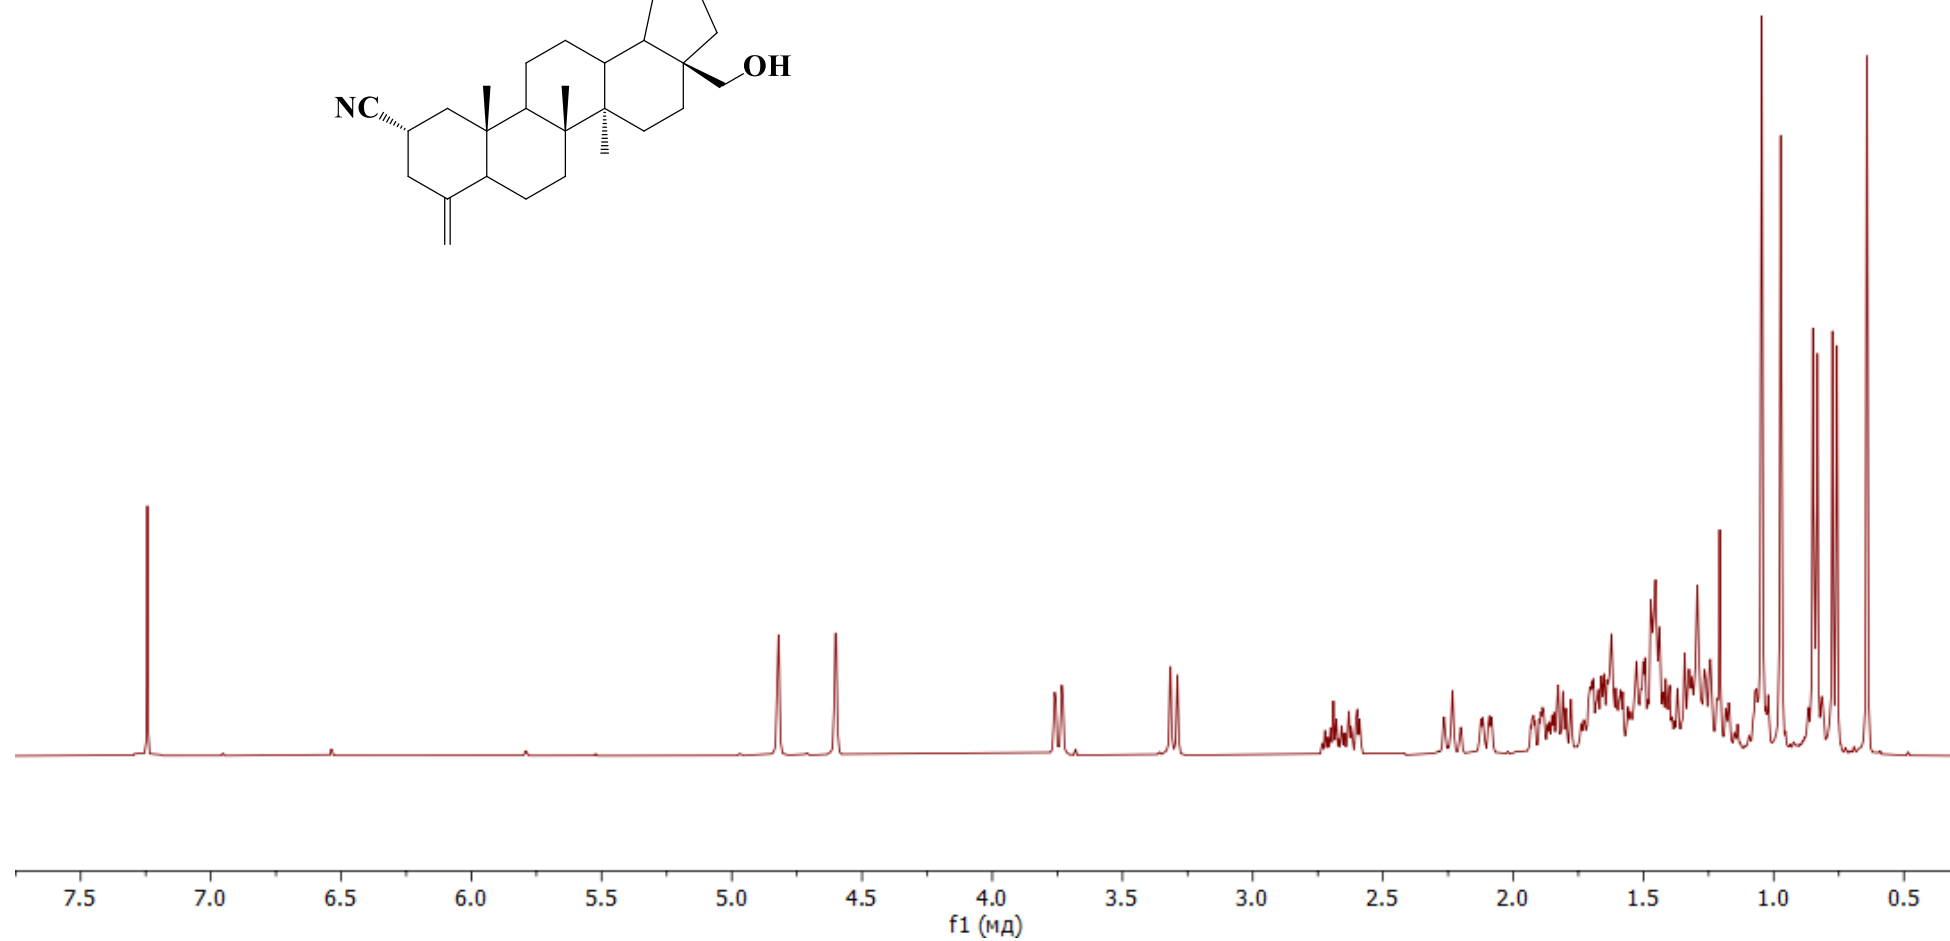

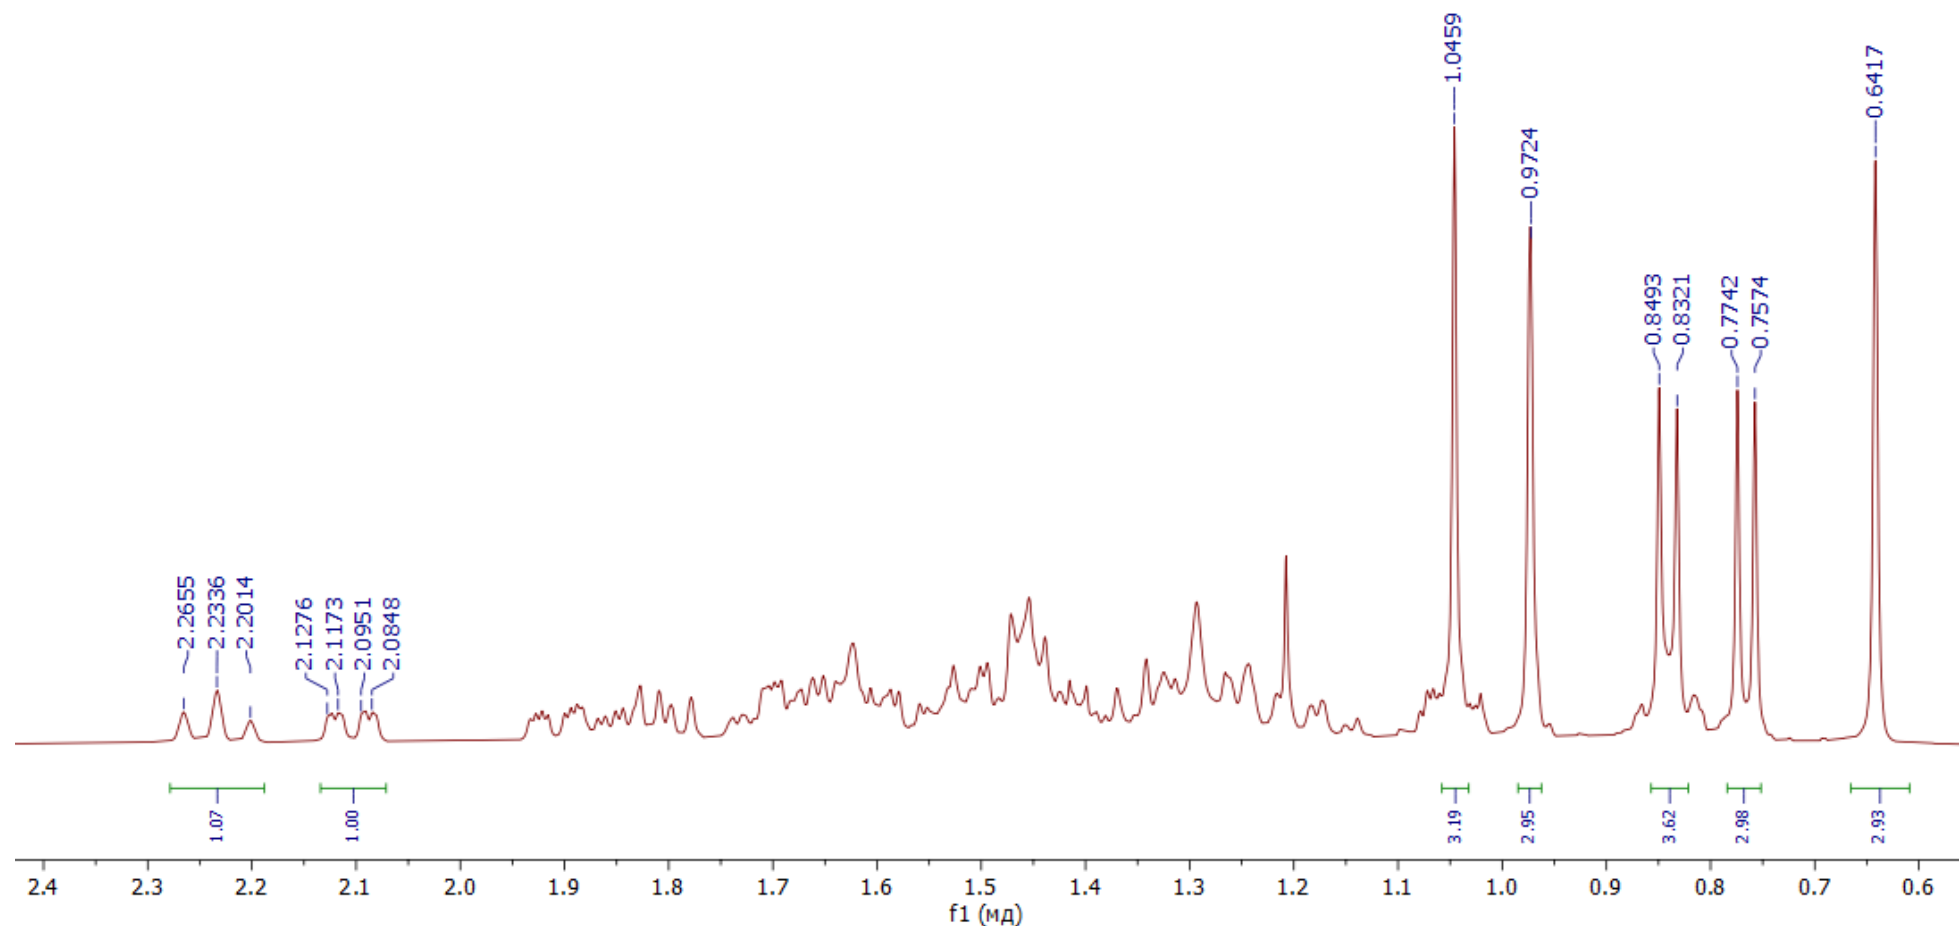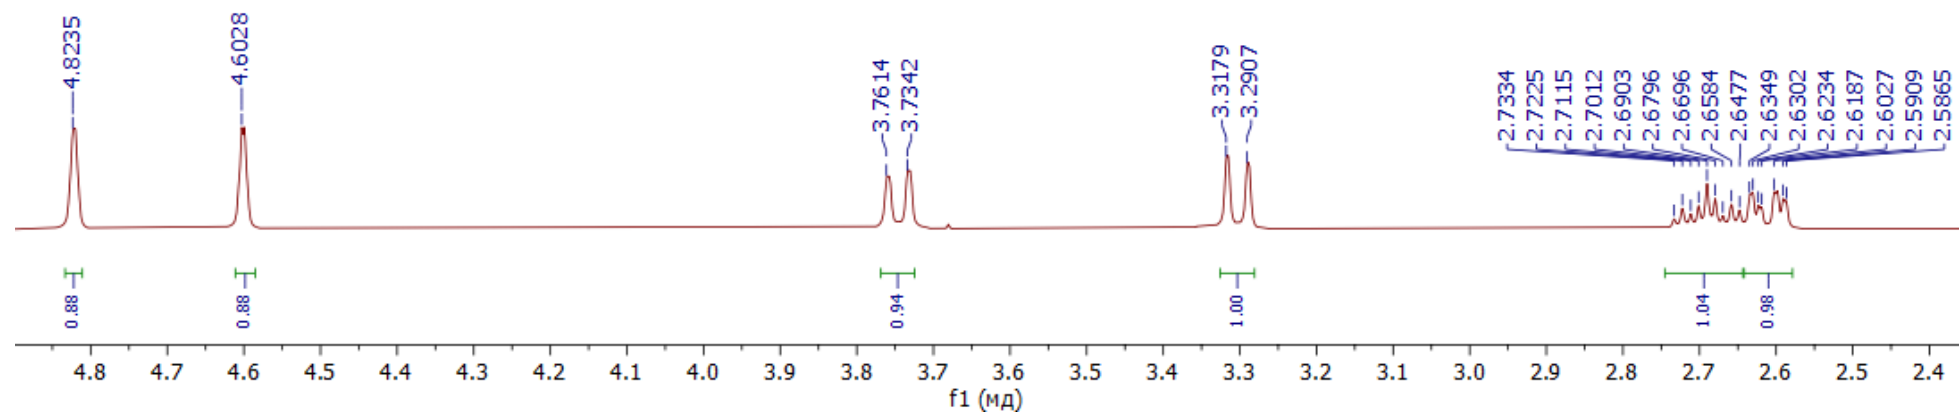



$^{13}\text{C}$  NMR spectra of 2-Cyano-28-hydroxy-3-norlup-4(23)-ene (12).

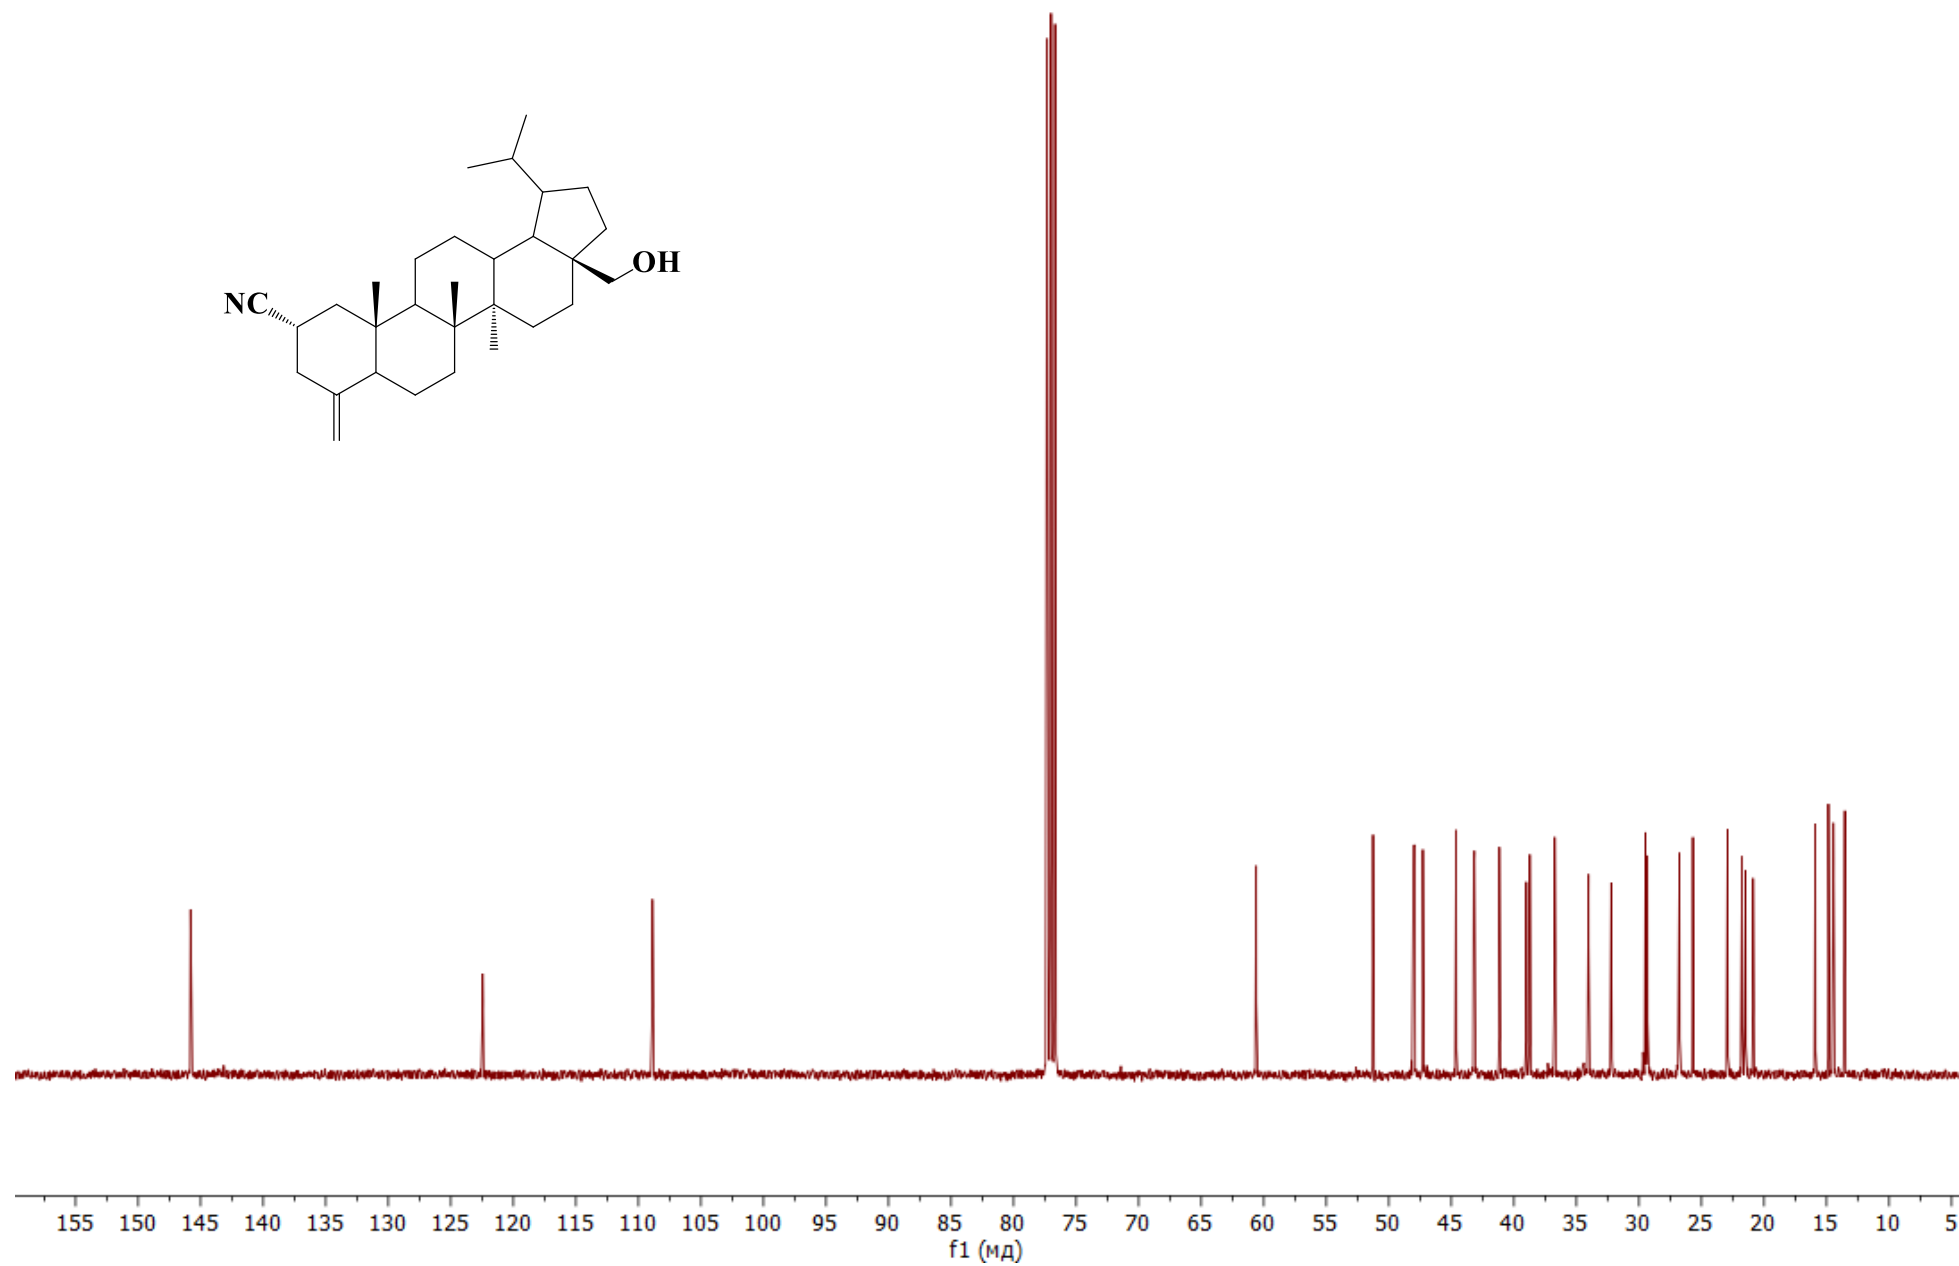

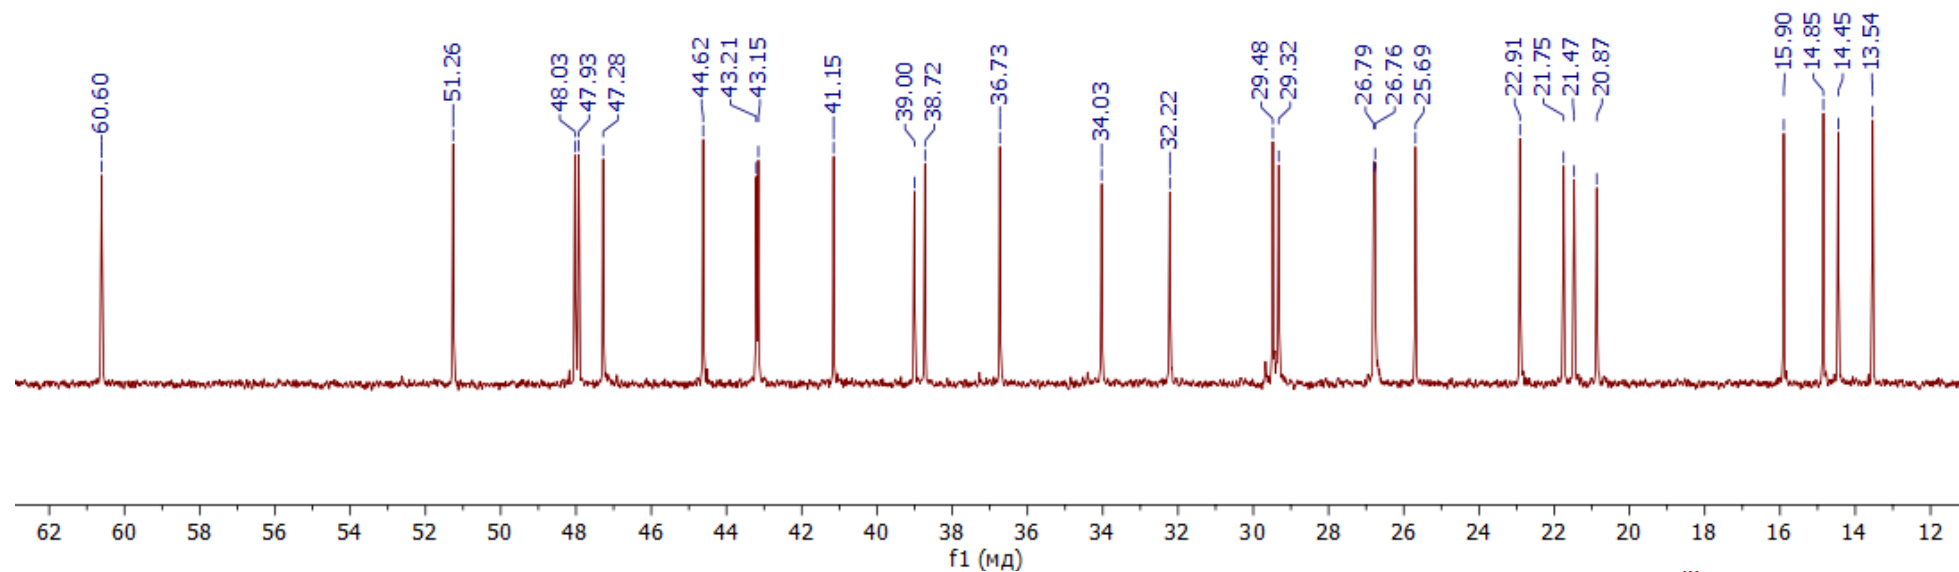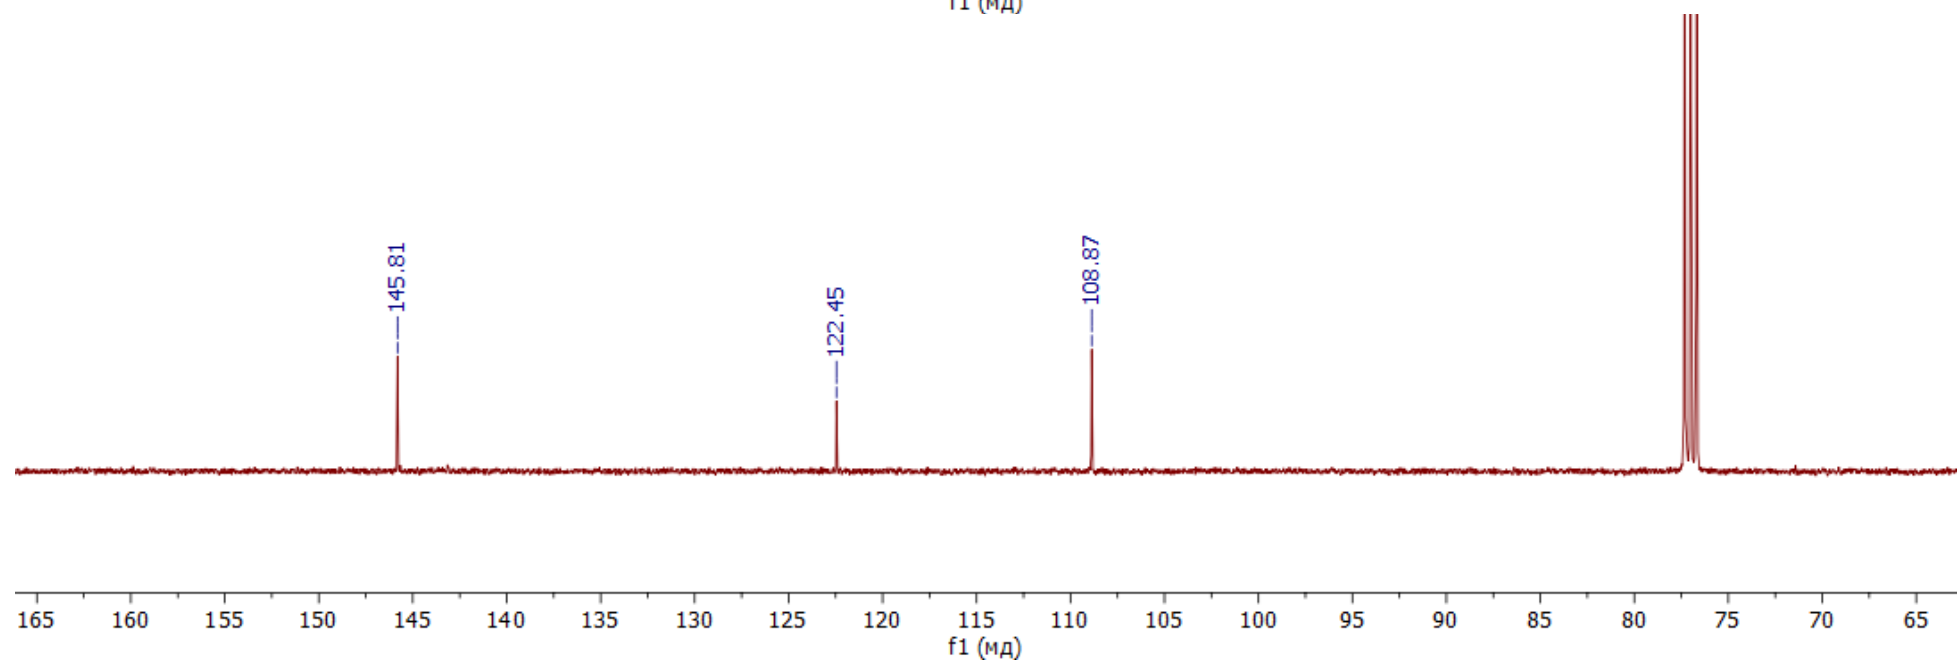

<sup>1</sup>H NMR spectra of 2-Cyano-3-norlup-4(23)-ene-28-oic acid methyl ester (13).

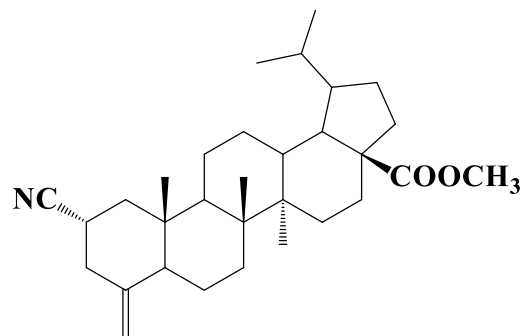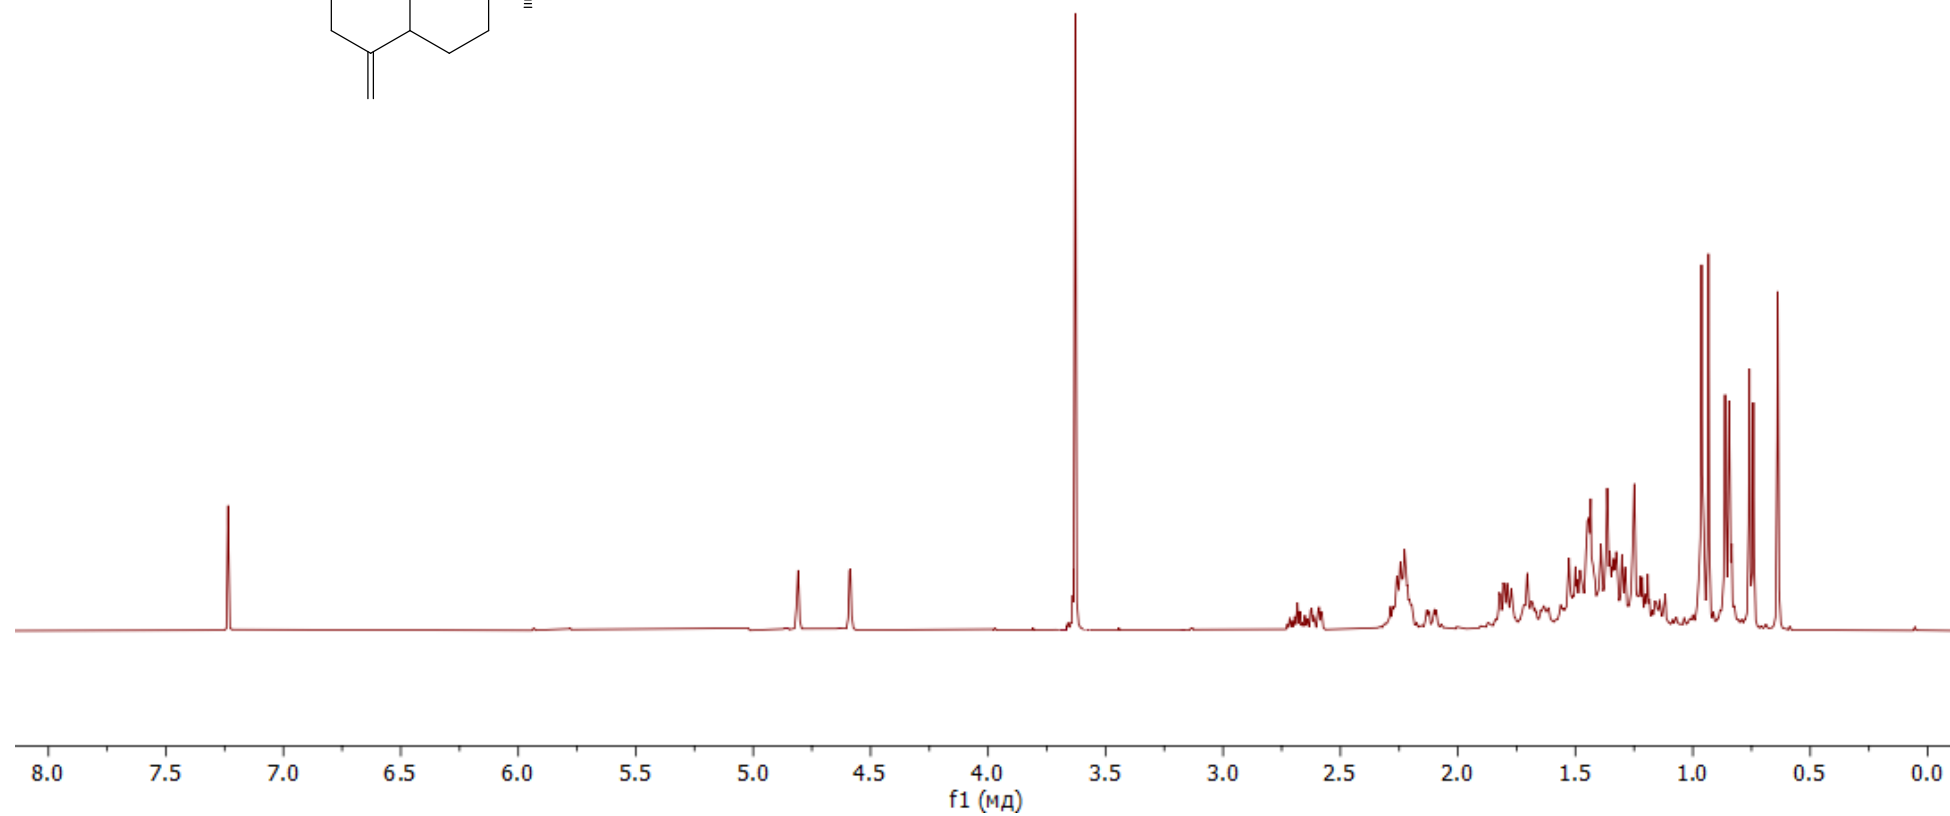

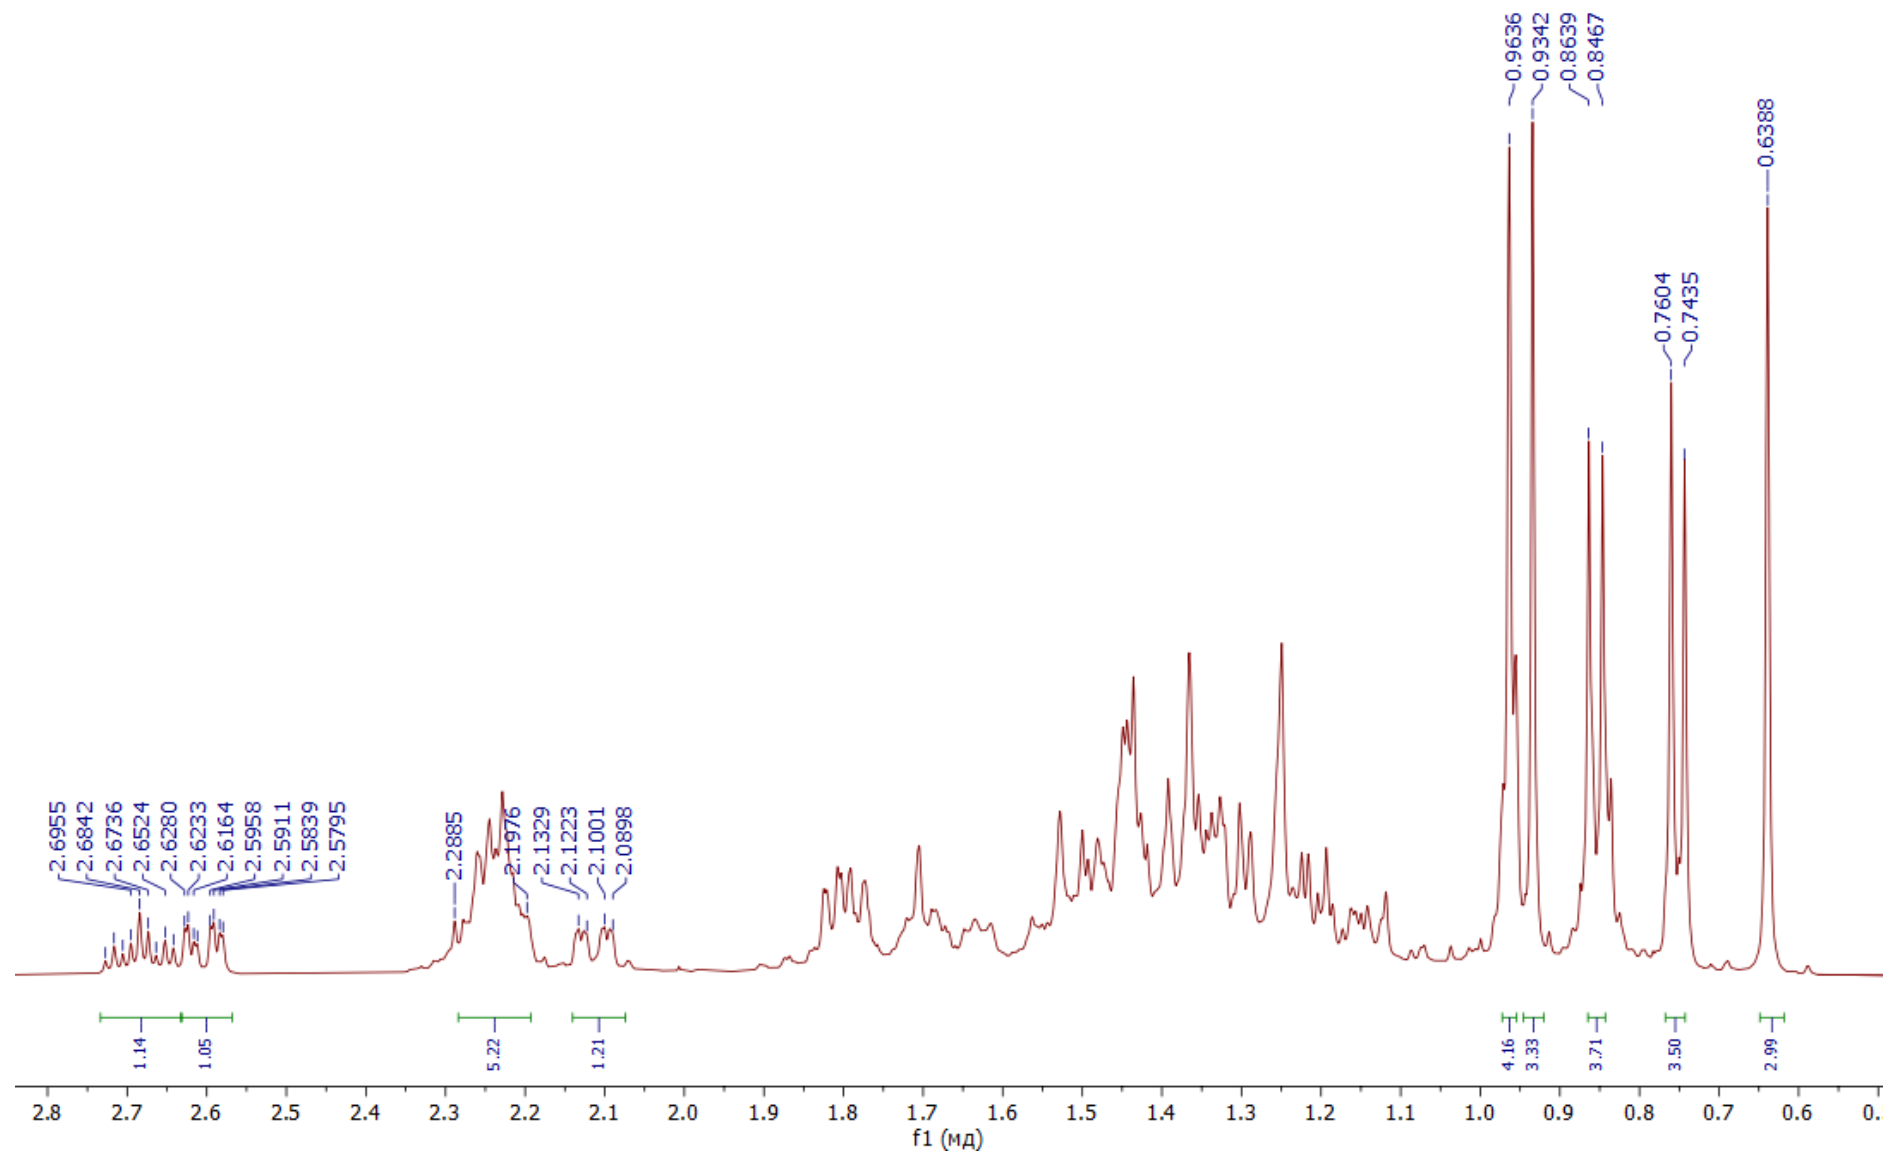

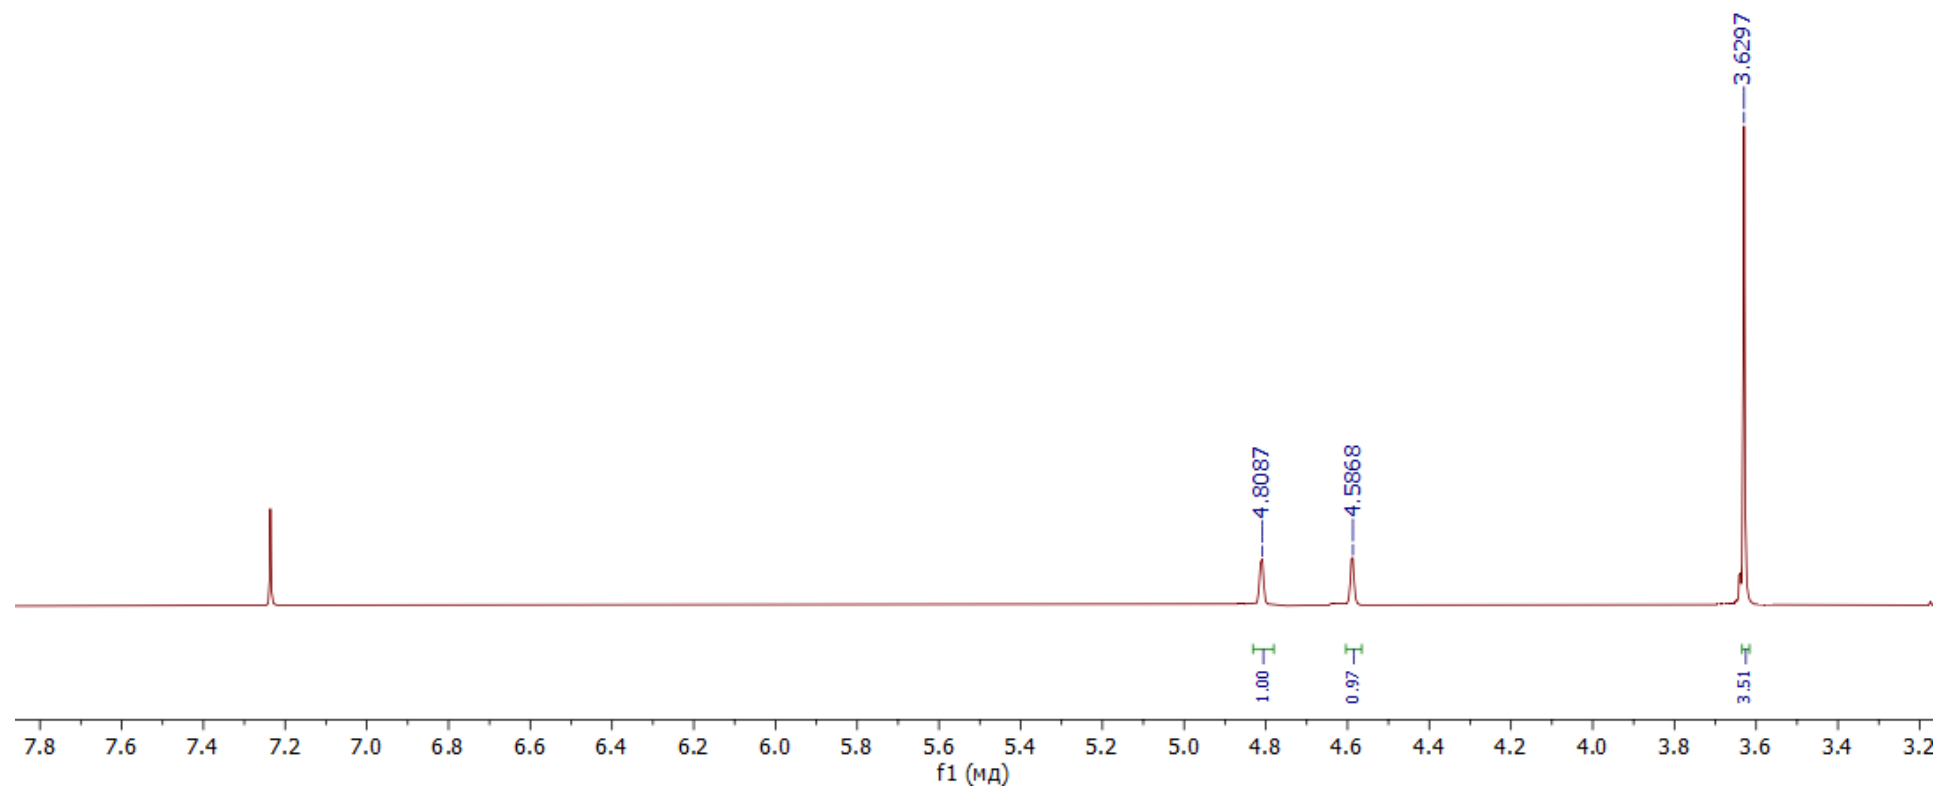

<sup>13</sup>C NMR spectra of 2-Cyano-3-norlup-4(23)-ene-28-oic acid methyl ester (13).

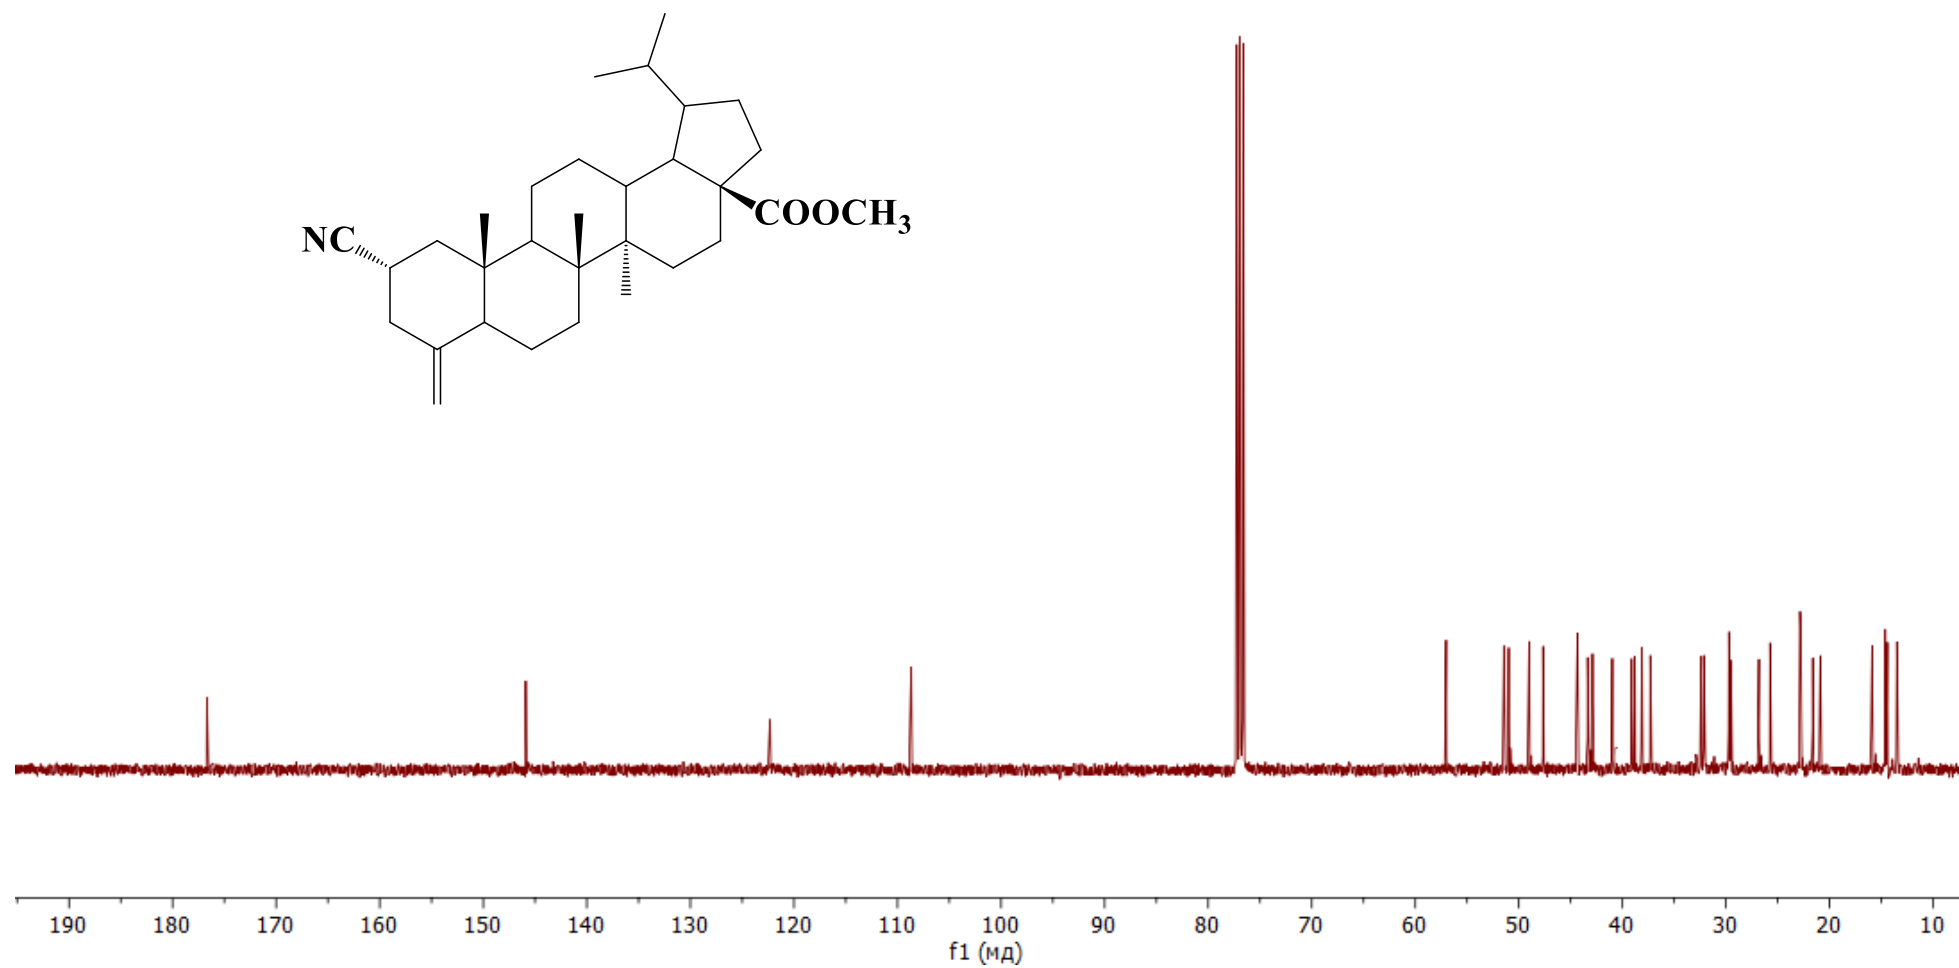

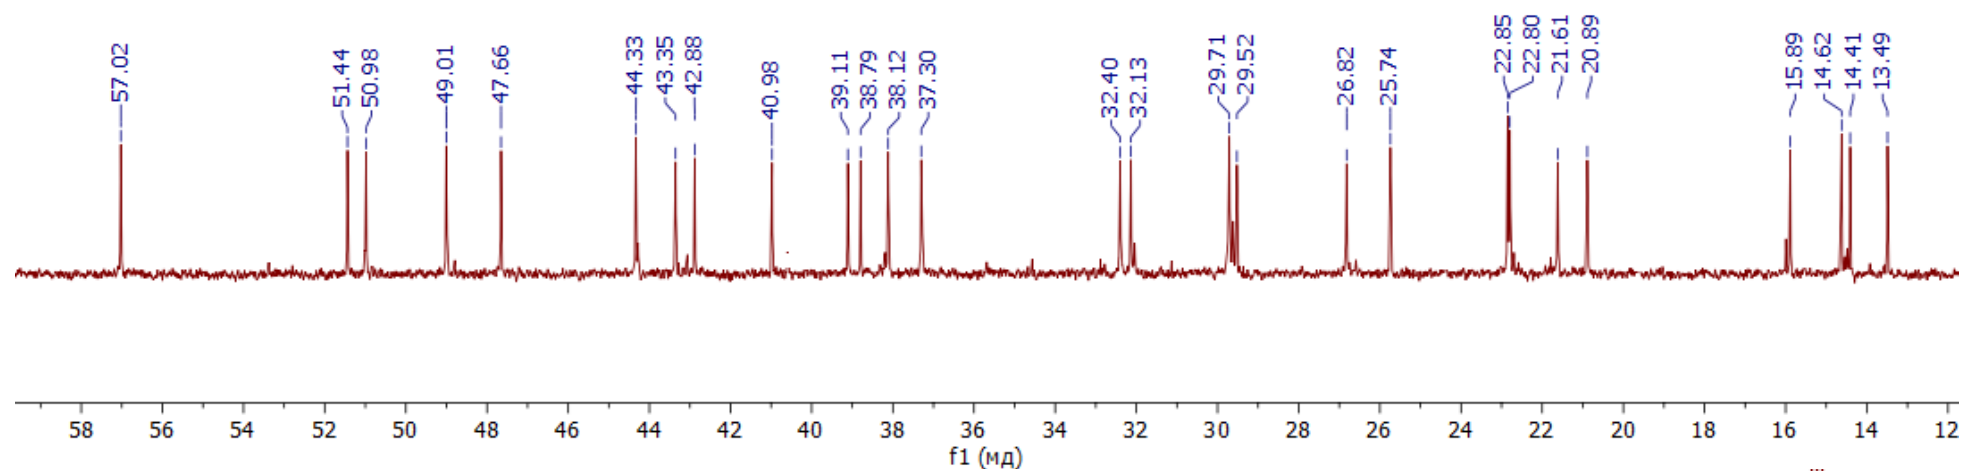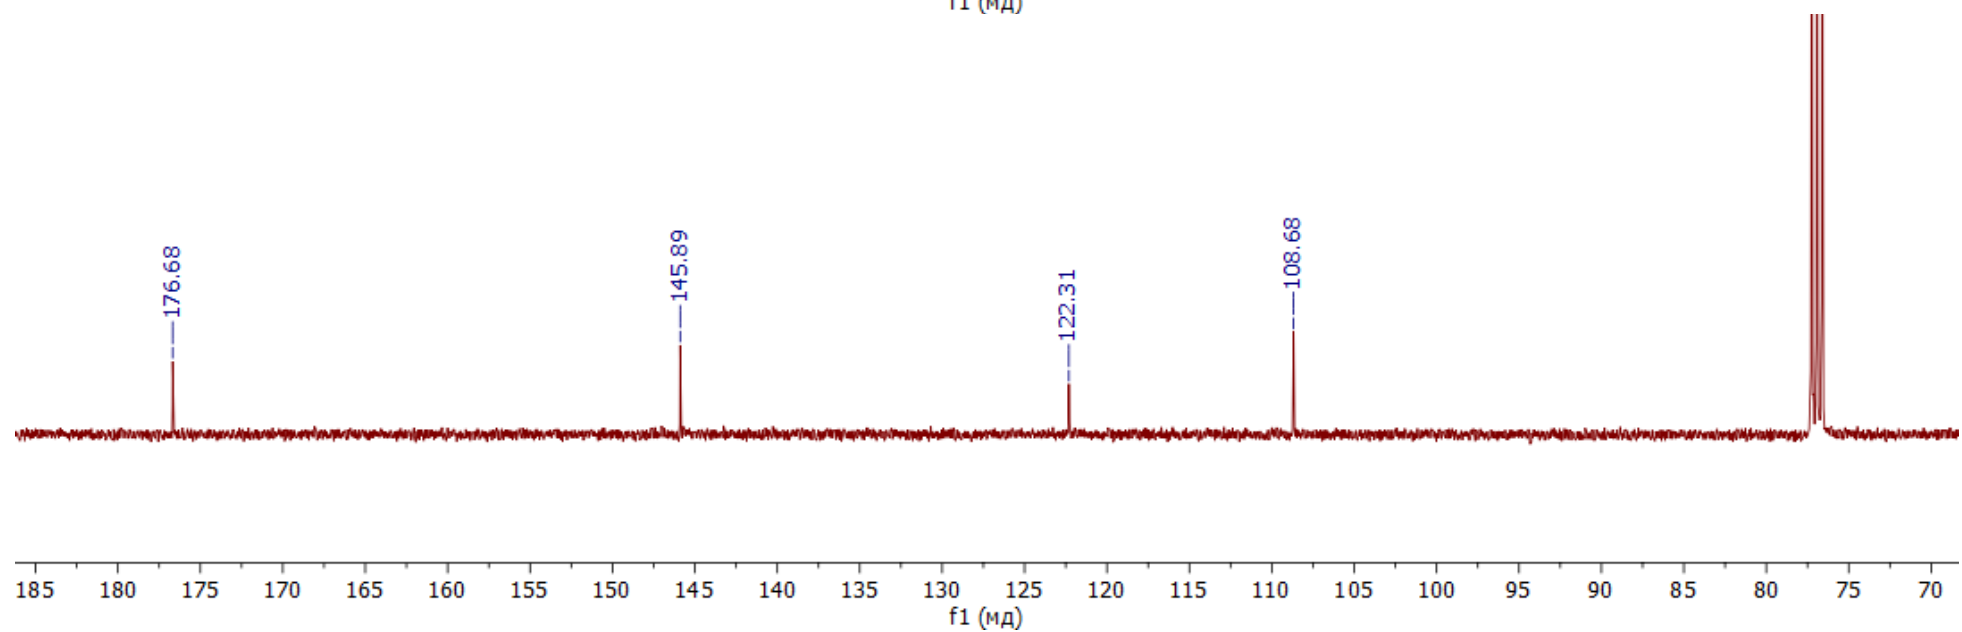

$^1\text{H}$  NMR spectra of 2-Cyano-28-hydroxy-4-oxo-3,23-dinorlup-2(24)-ene (14).

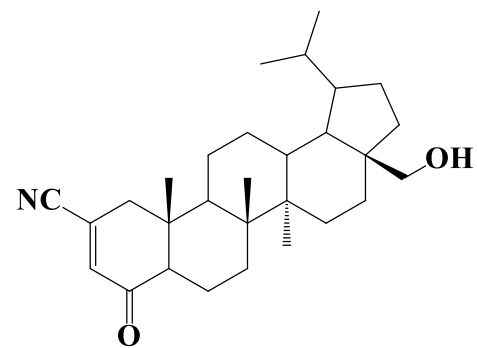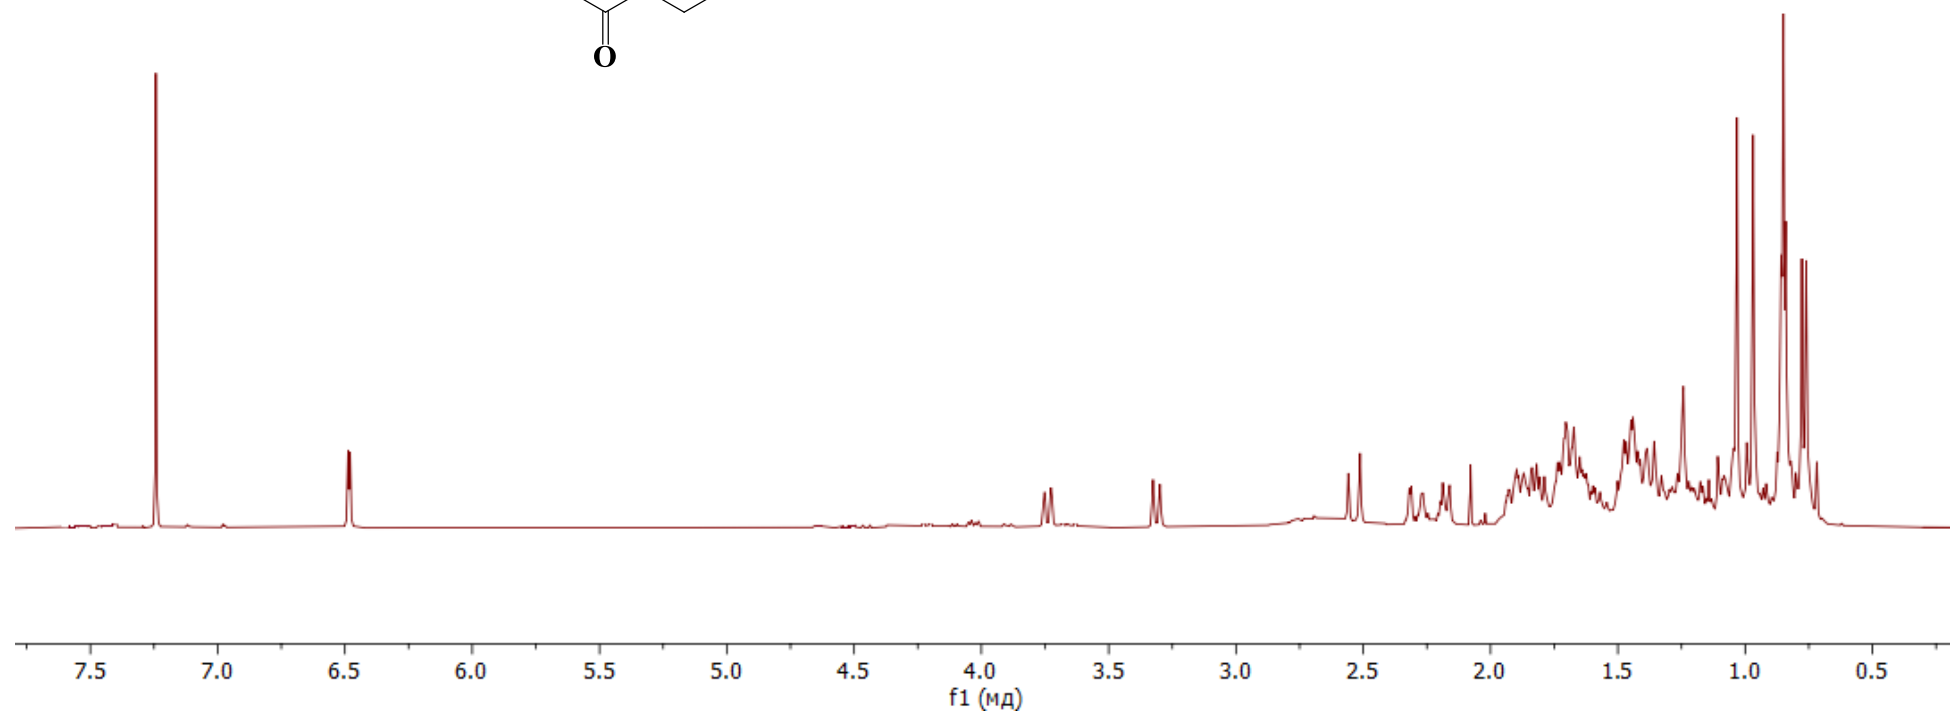



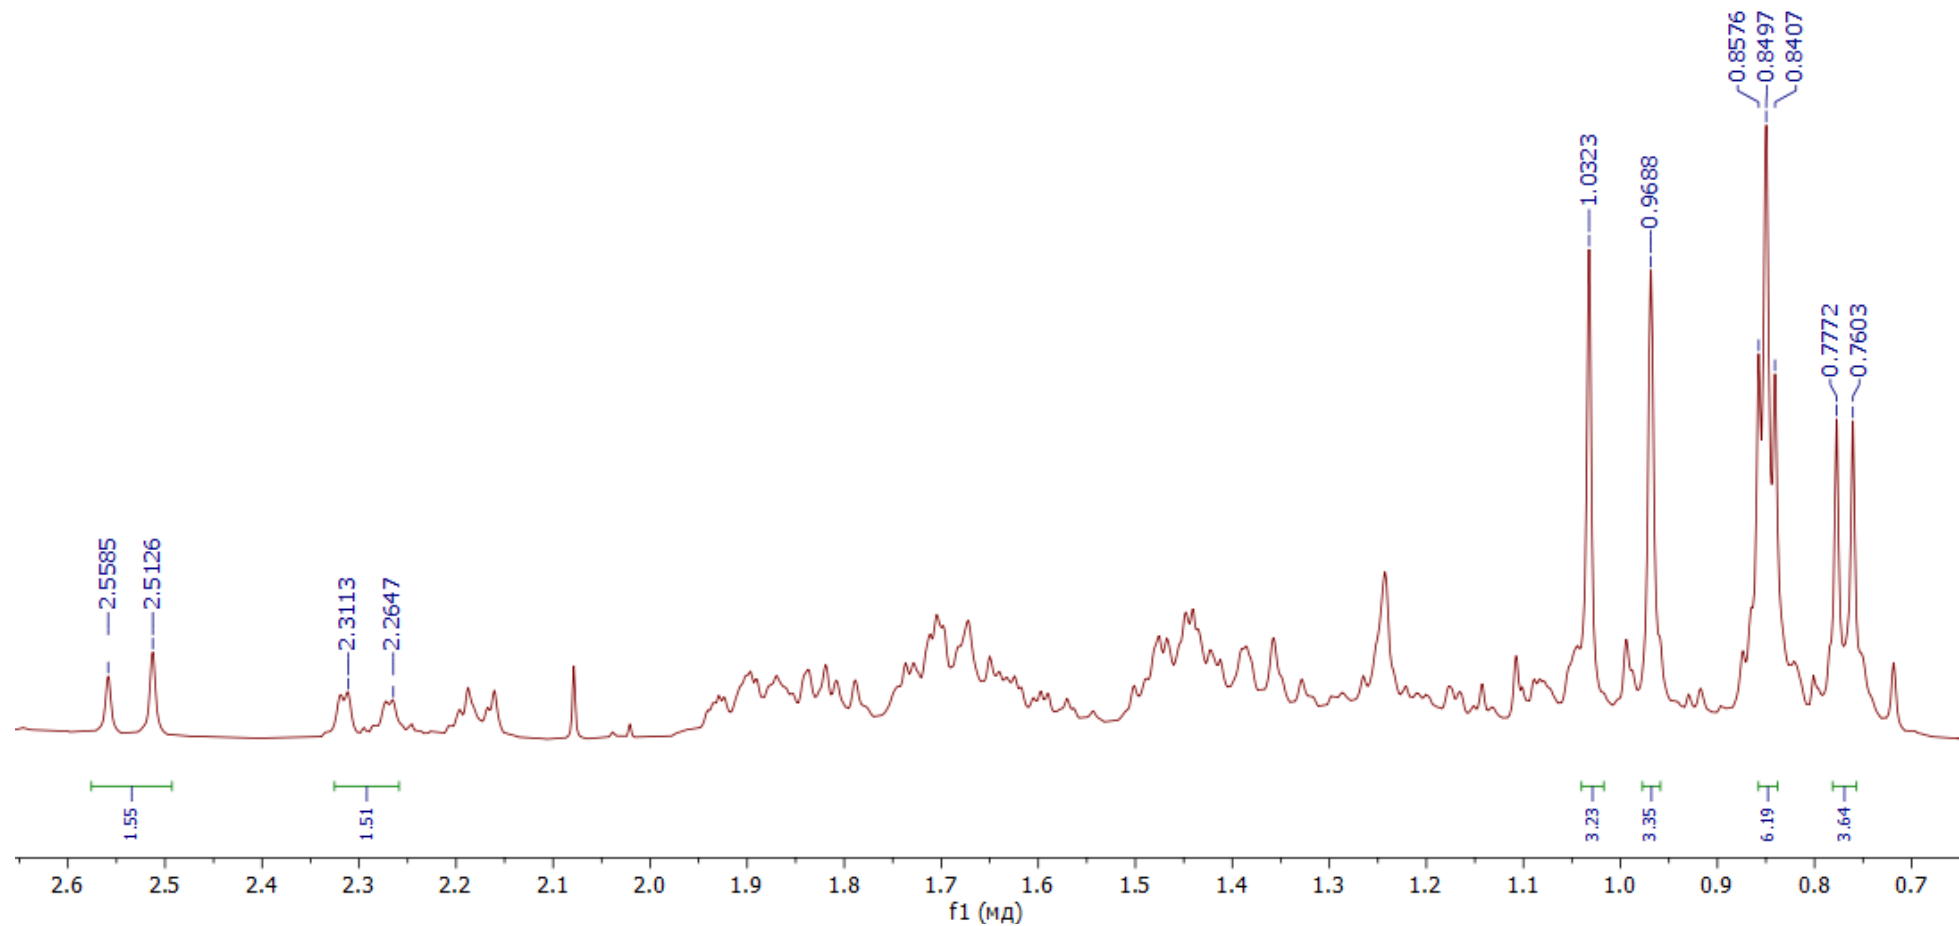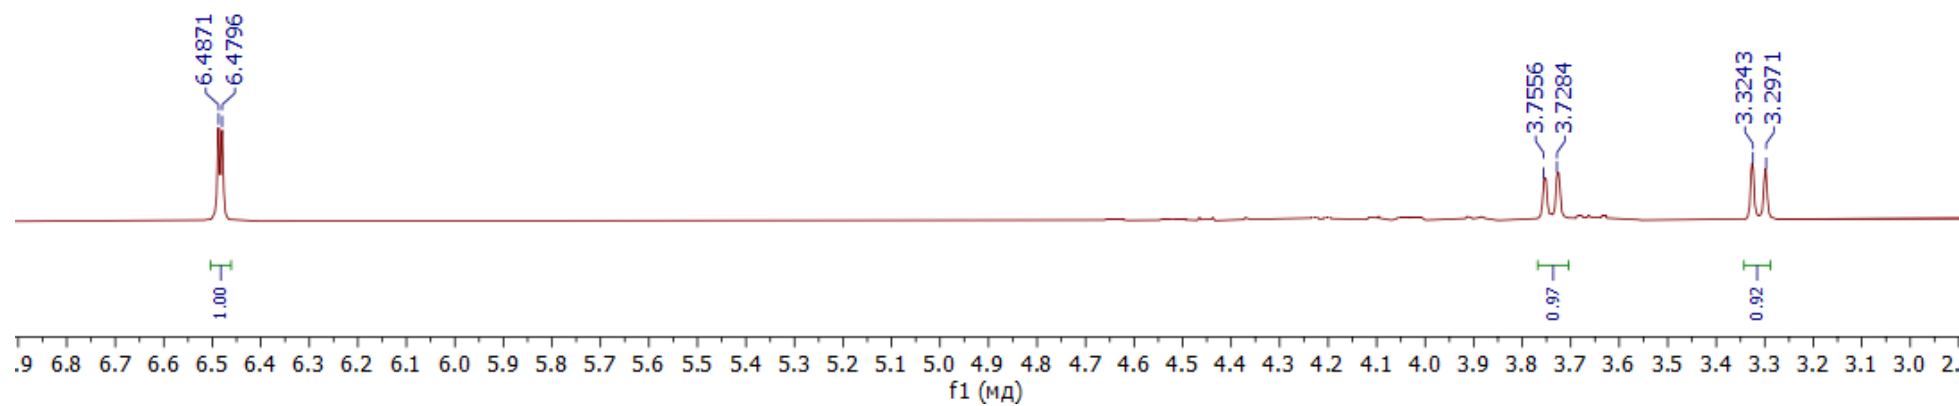

$^{13}\text{C}$  NMR spectra of 2-Cyano-28-hydroxy-4-oxo-3,23-dinorlup-2(24)-ene (14).

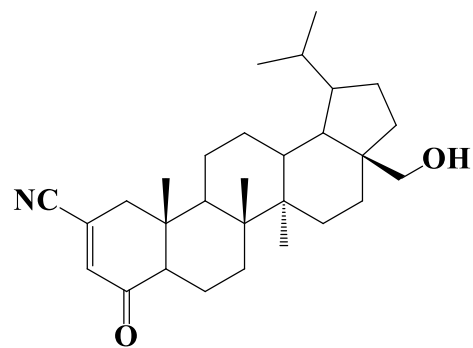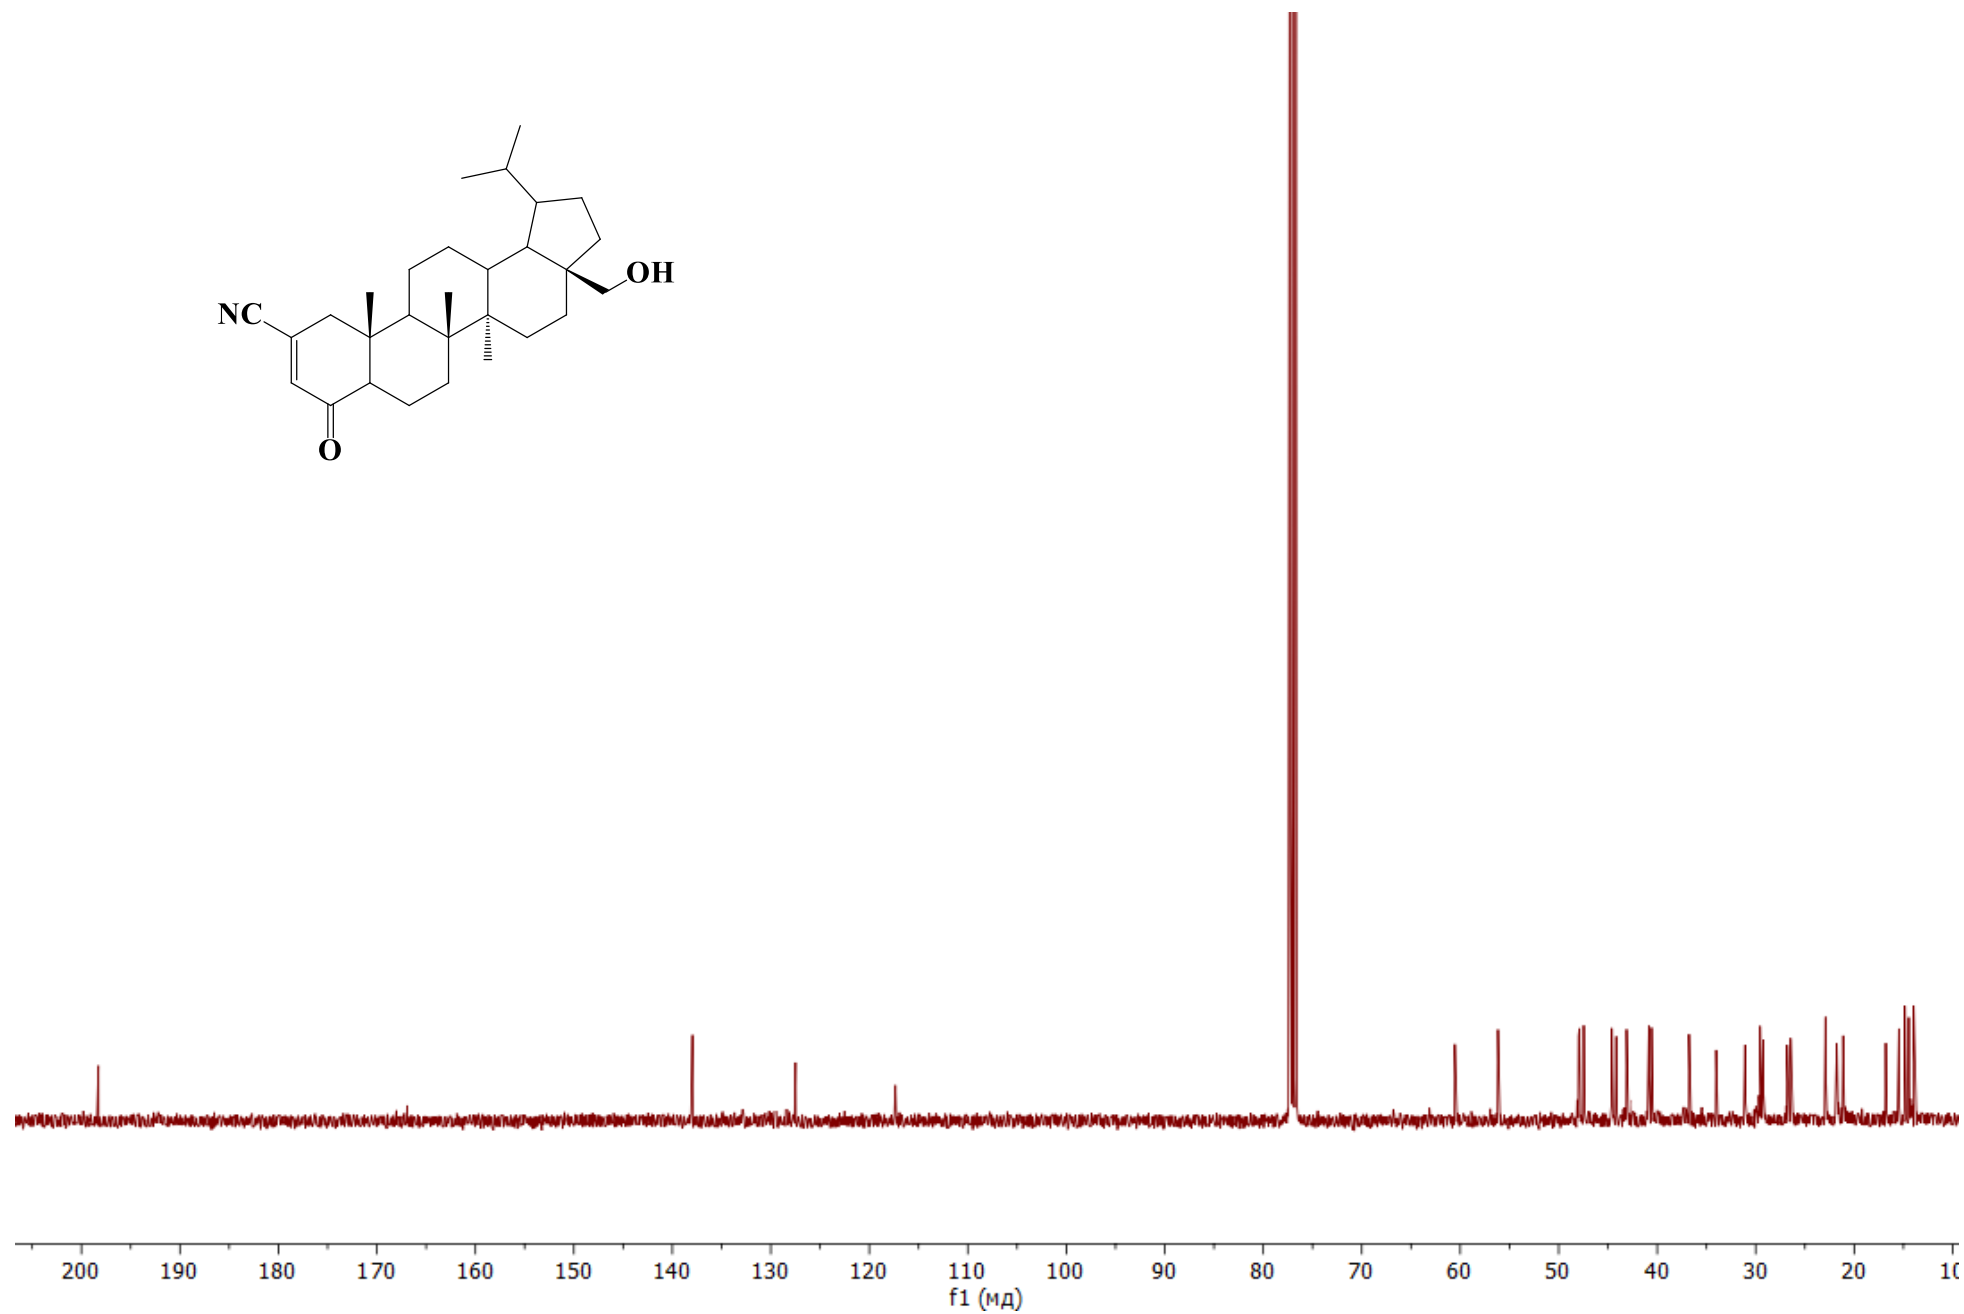

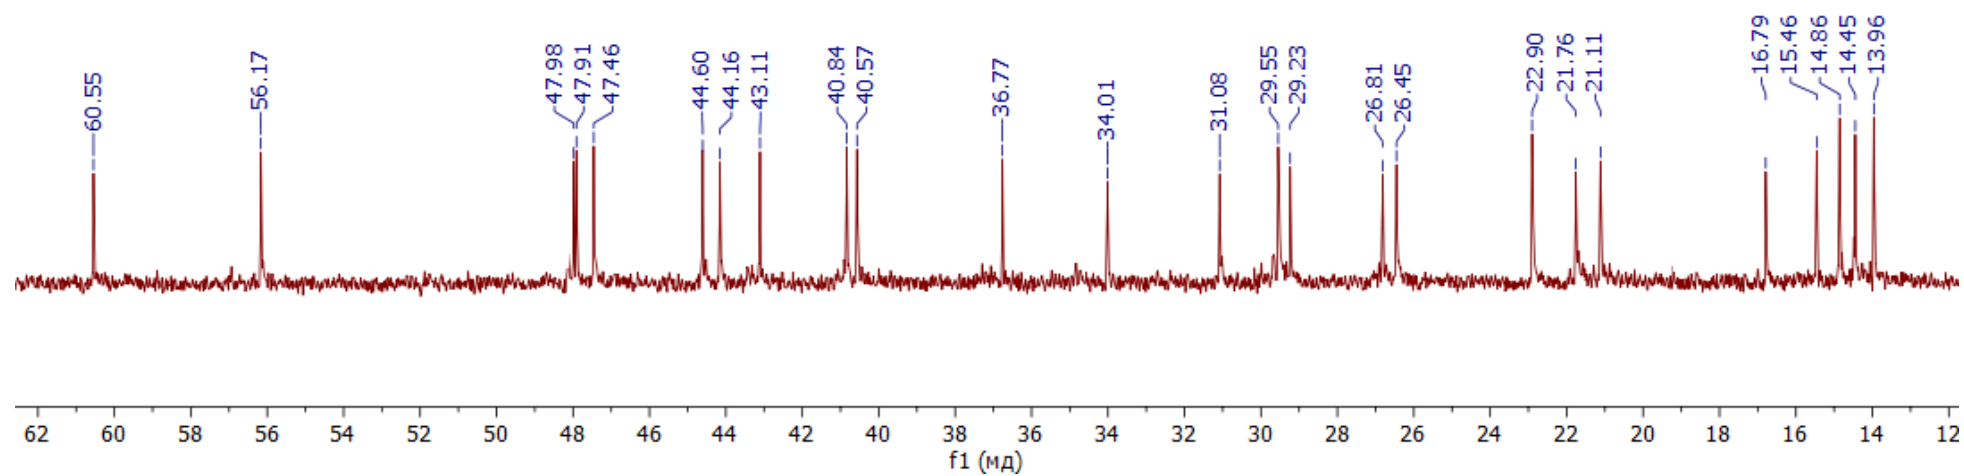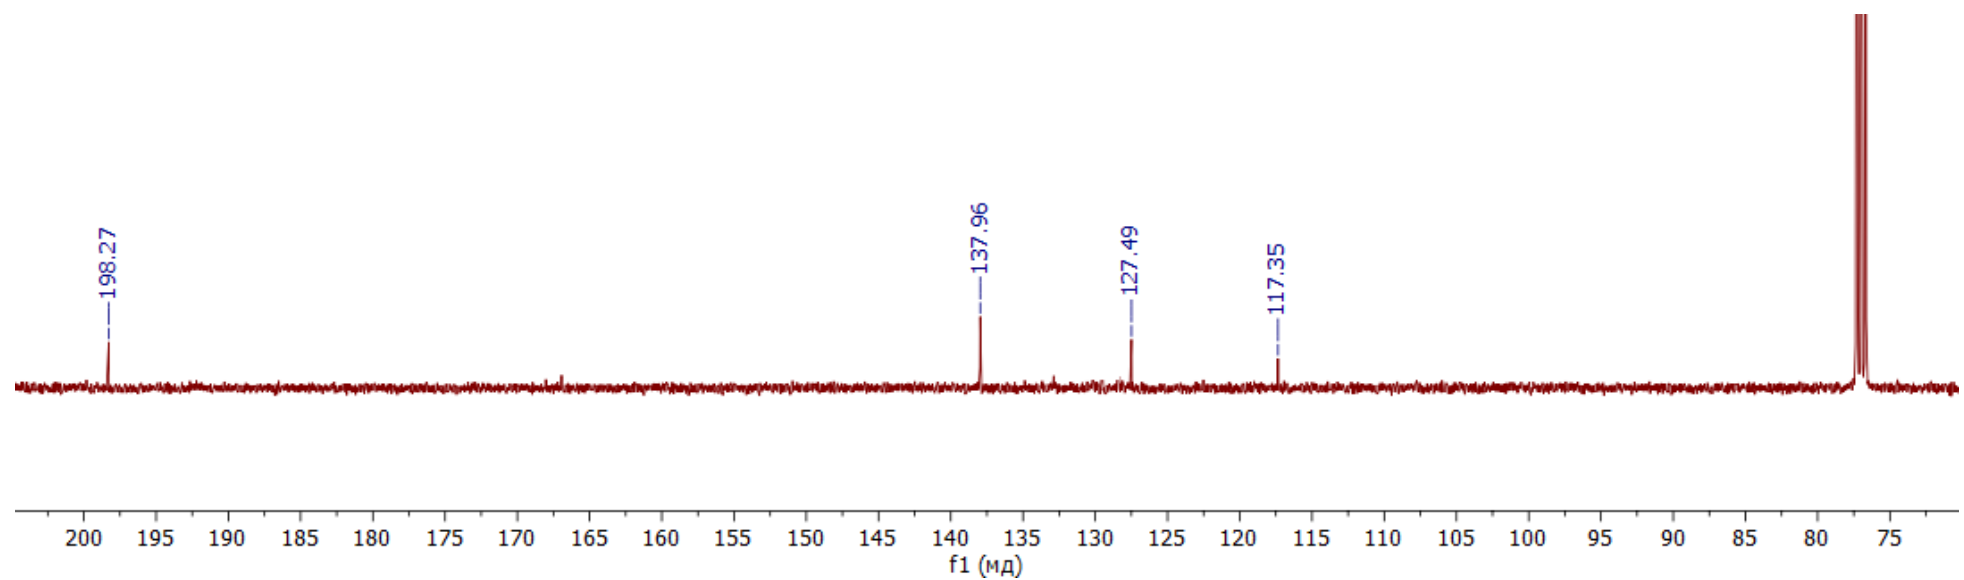

$^1\text{H}$  NMR spectra of 2-Cyano-4-oxo-3,23-dinorlup-2(24)-en-28-oic acid methyl ester (15).

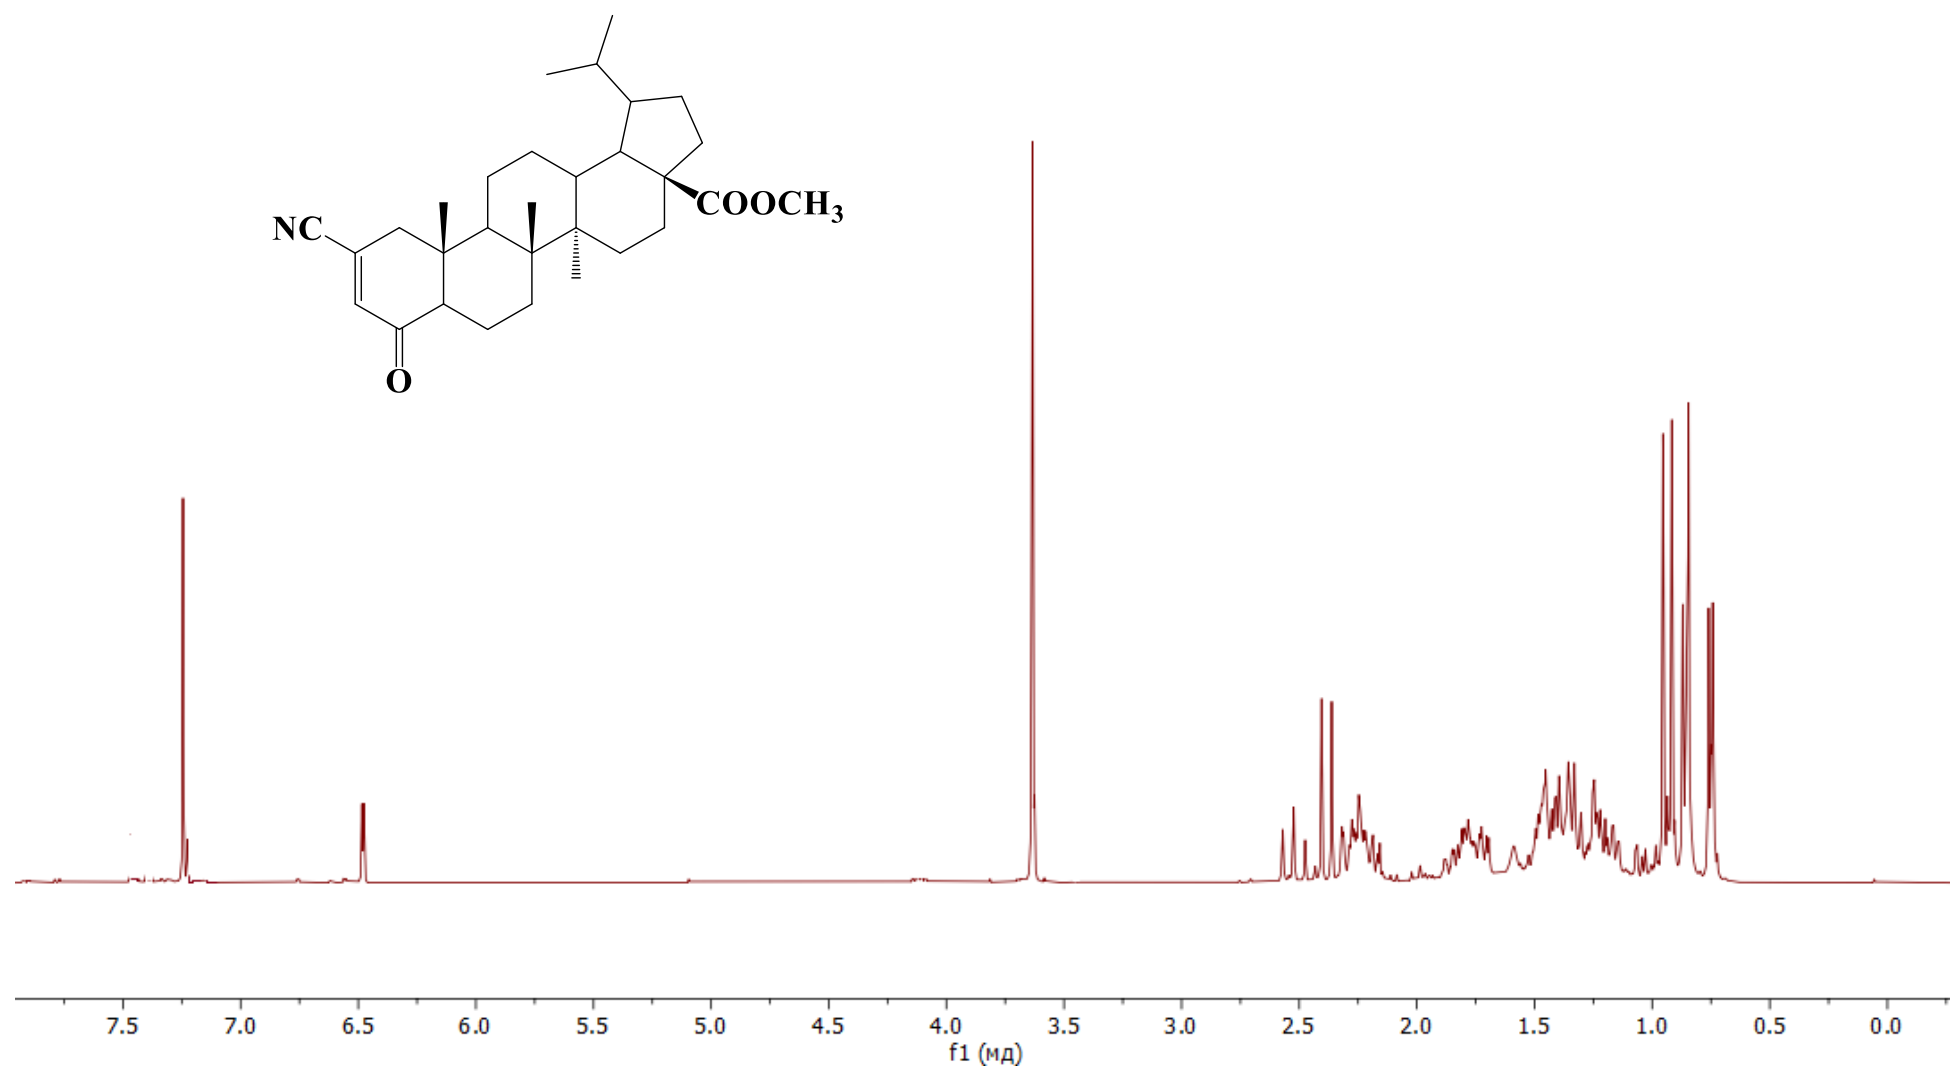

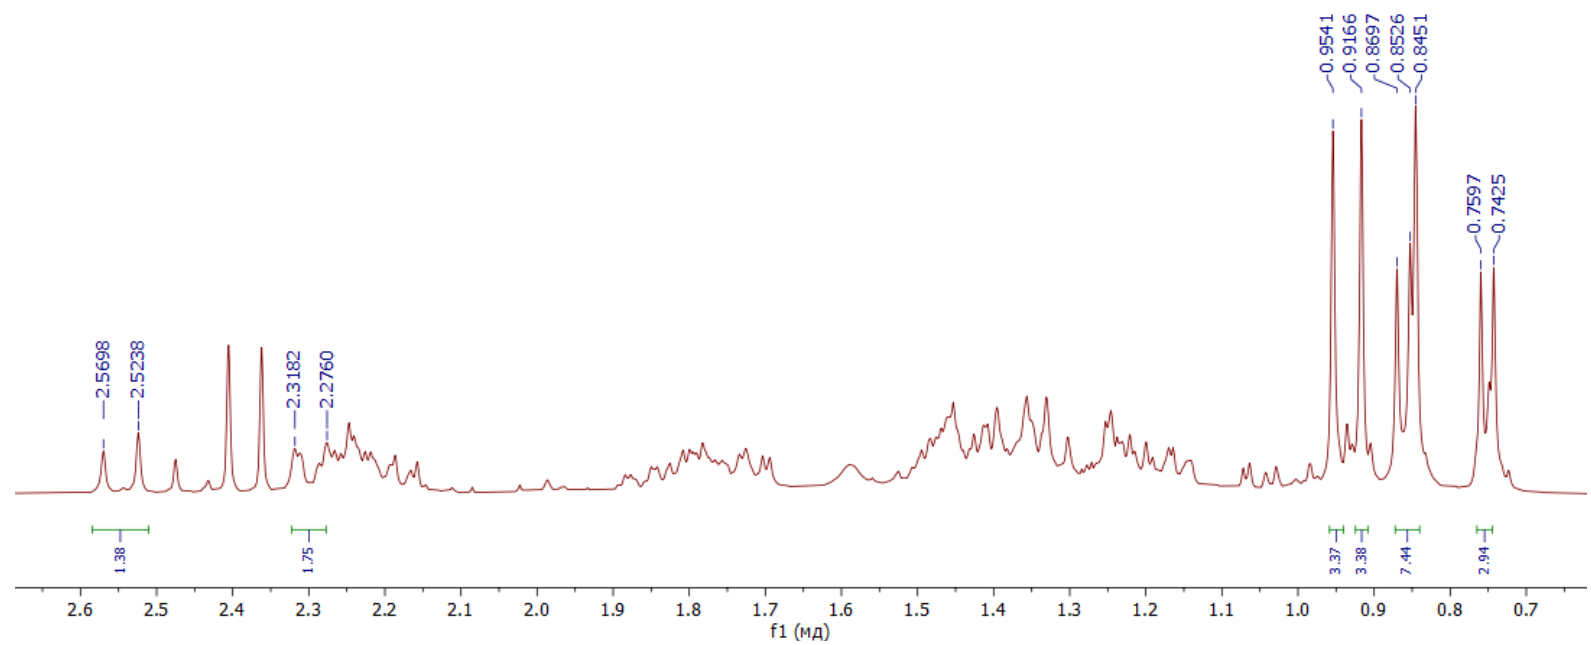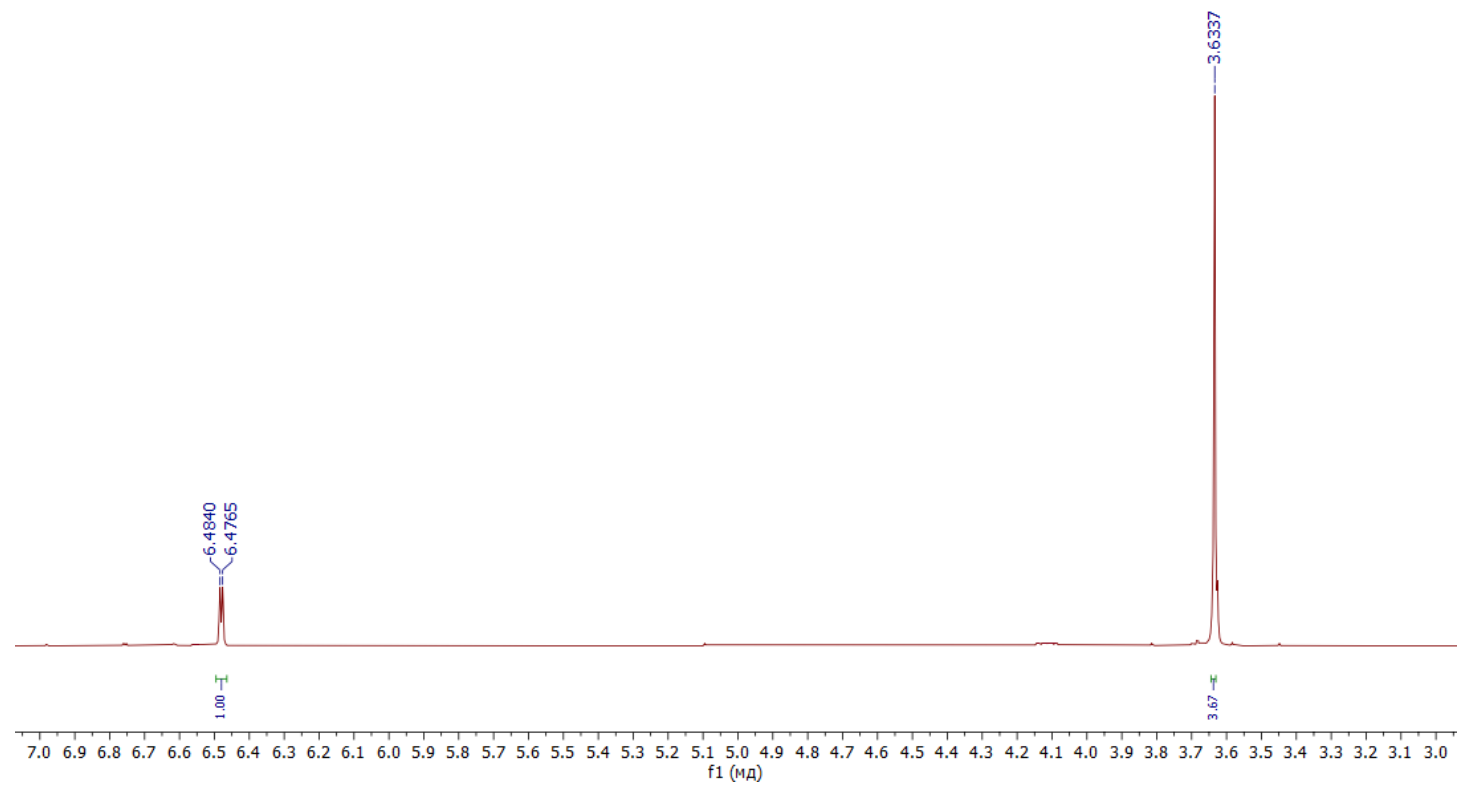

$^{13}\text{C}$  NMR spectra of 2-Cyano-4-oxo-3,23-dinorlup-2(24)-en-28-oic acid methyl ester (15).

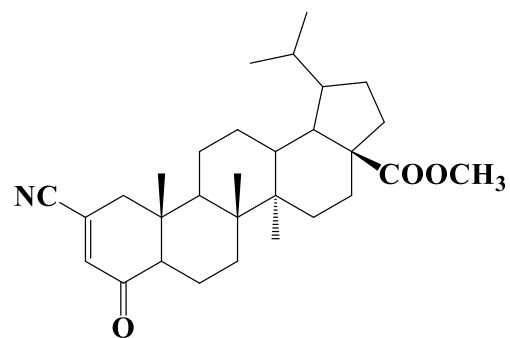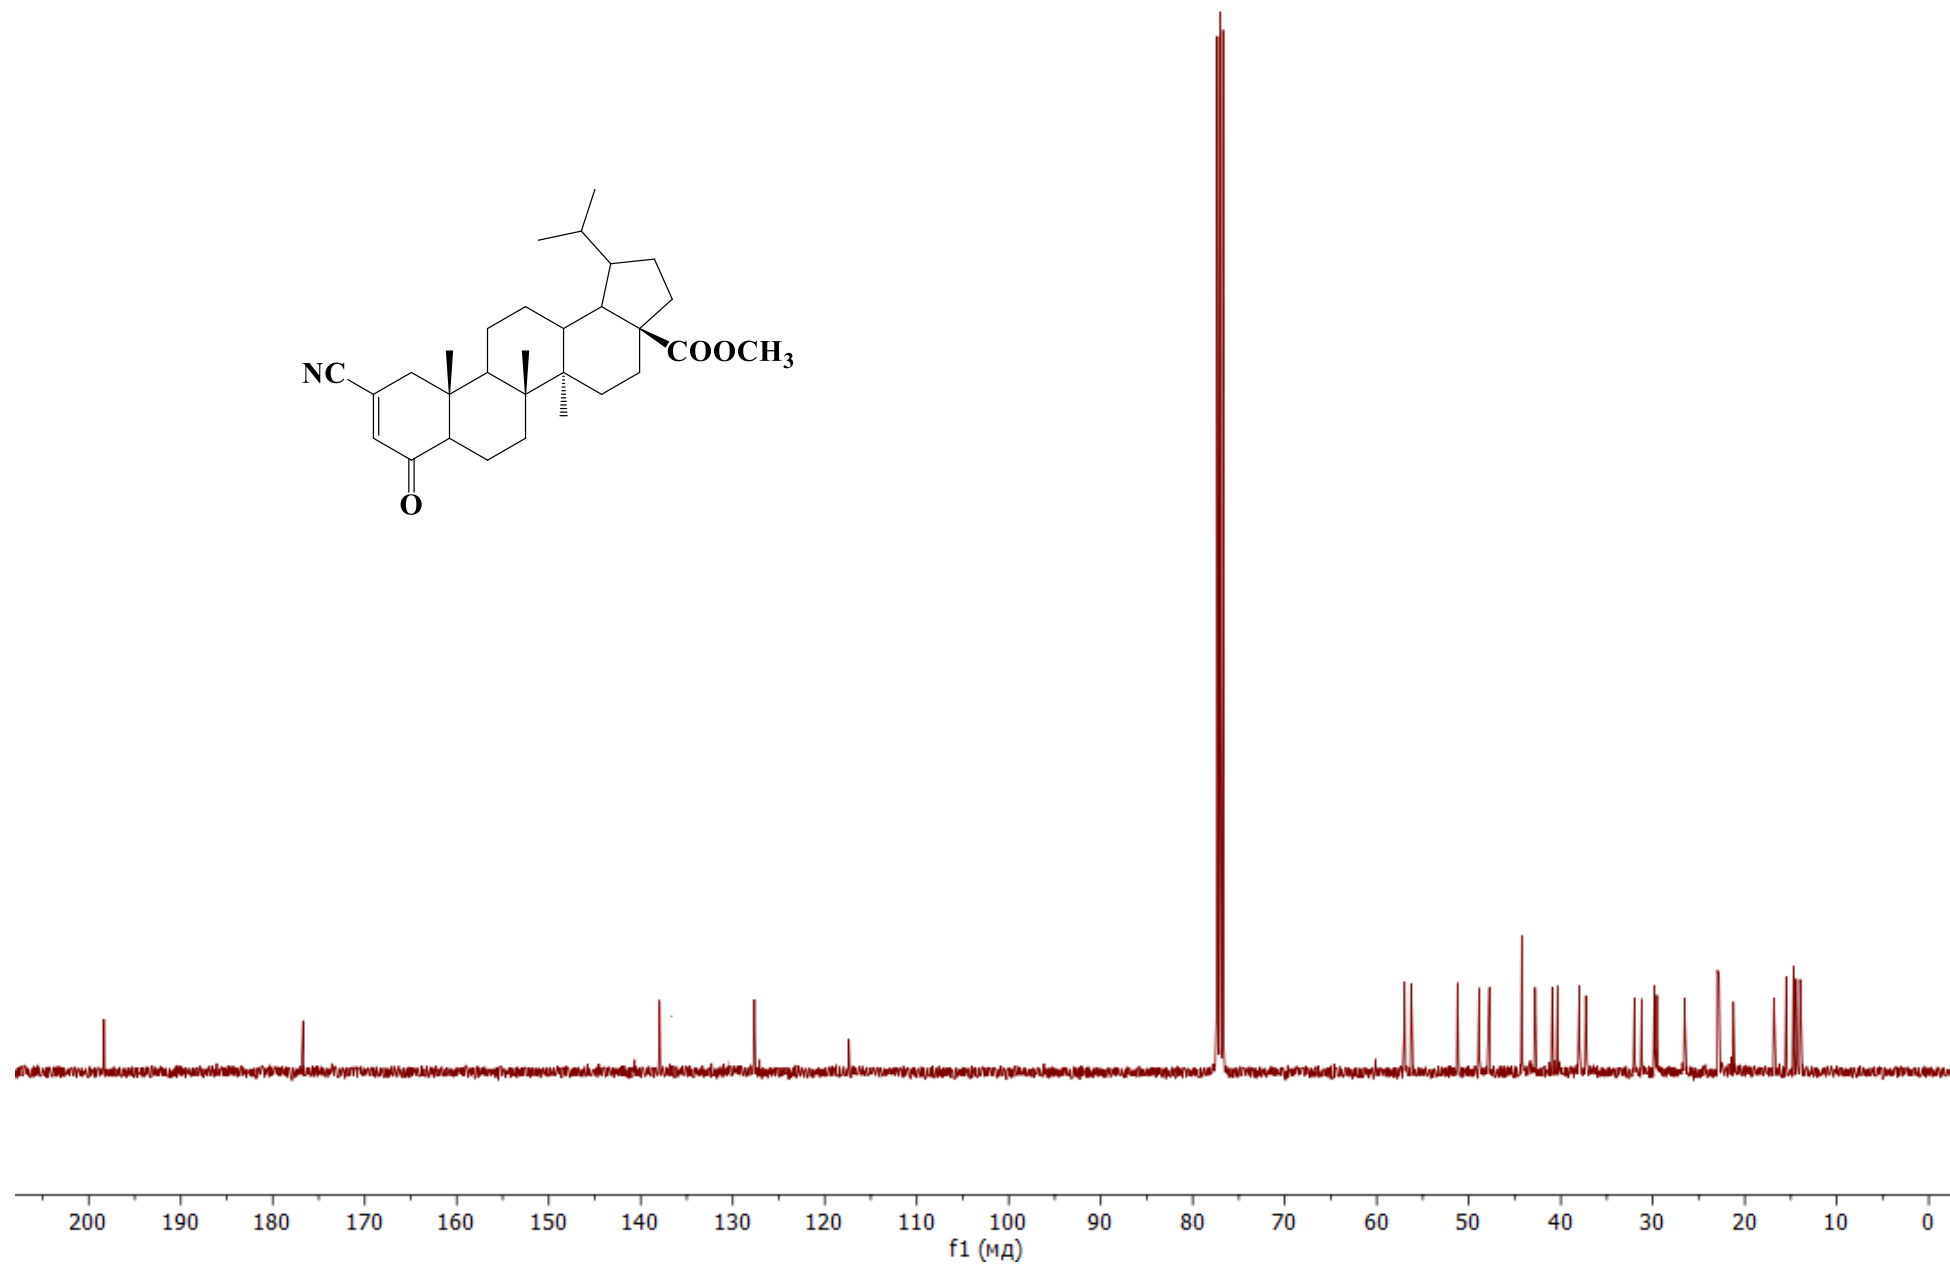

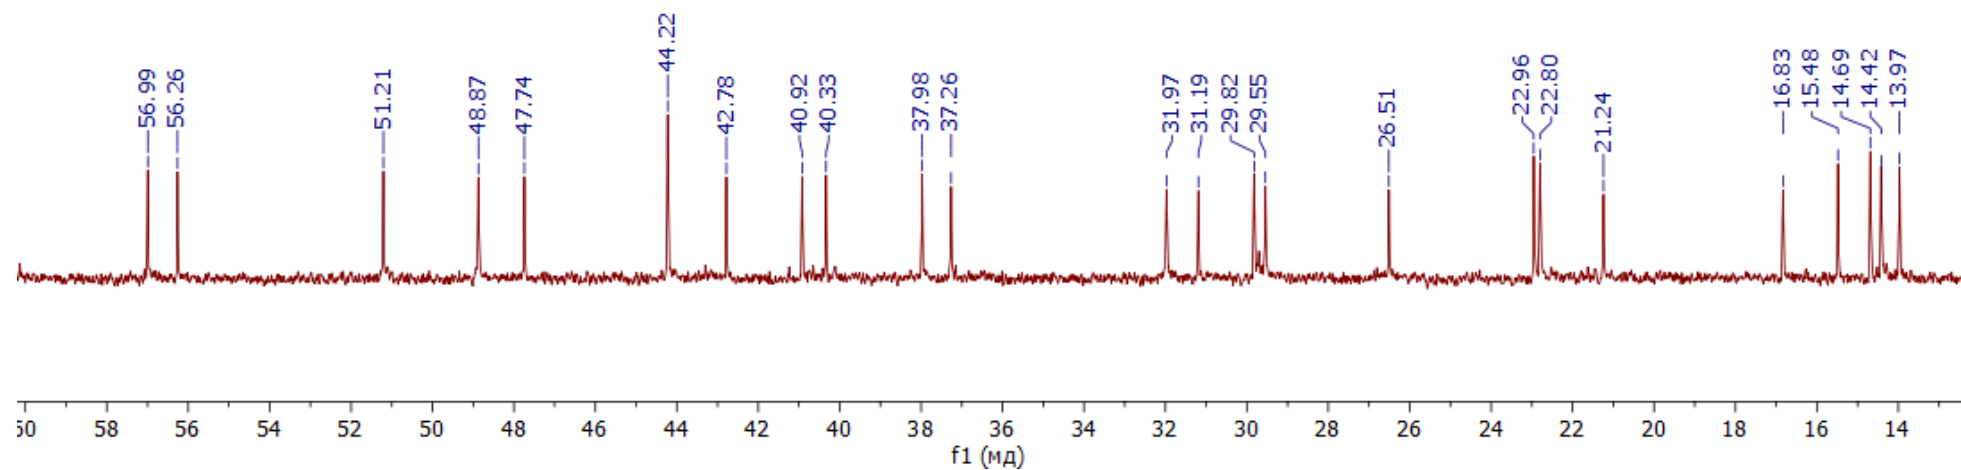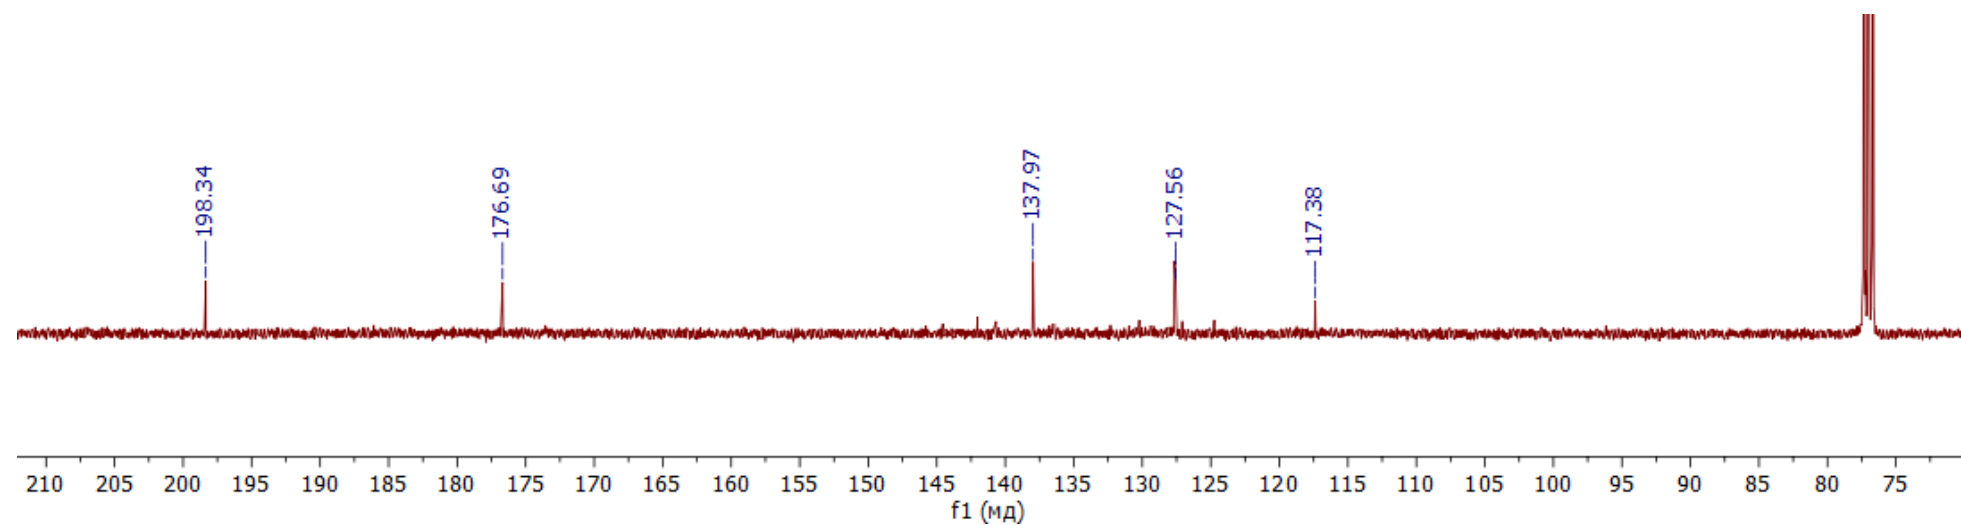

$^1\text{H}$  NMR spectra of 2-Cyano-28-hydroxy-4-oxo-3,23-dinorlupan (16).

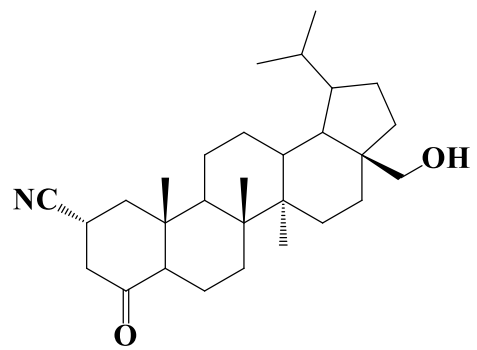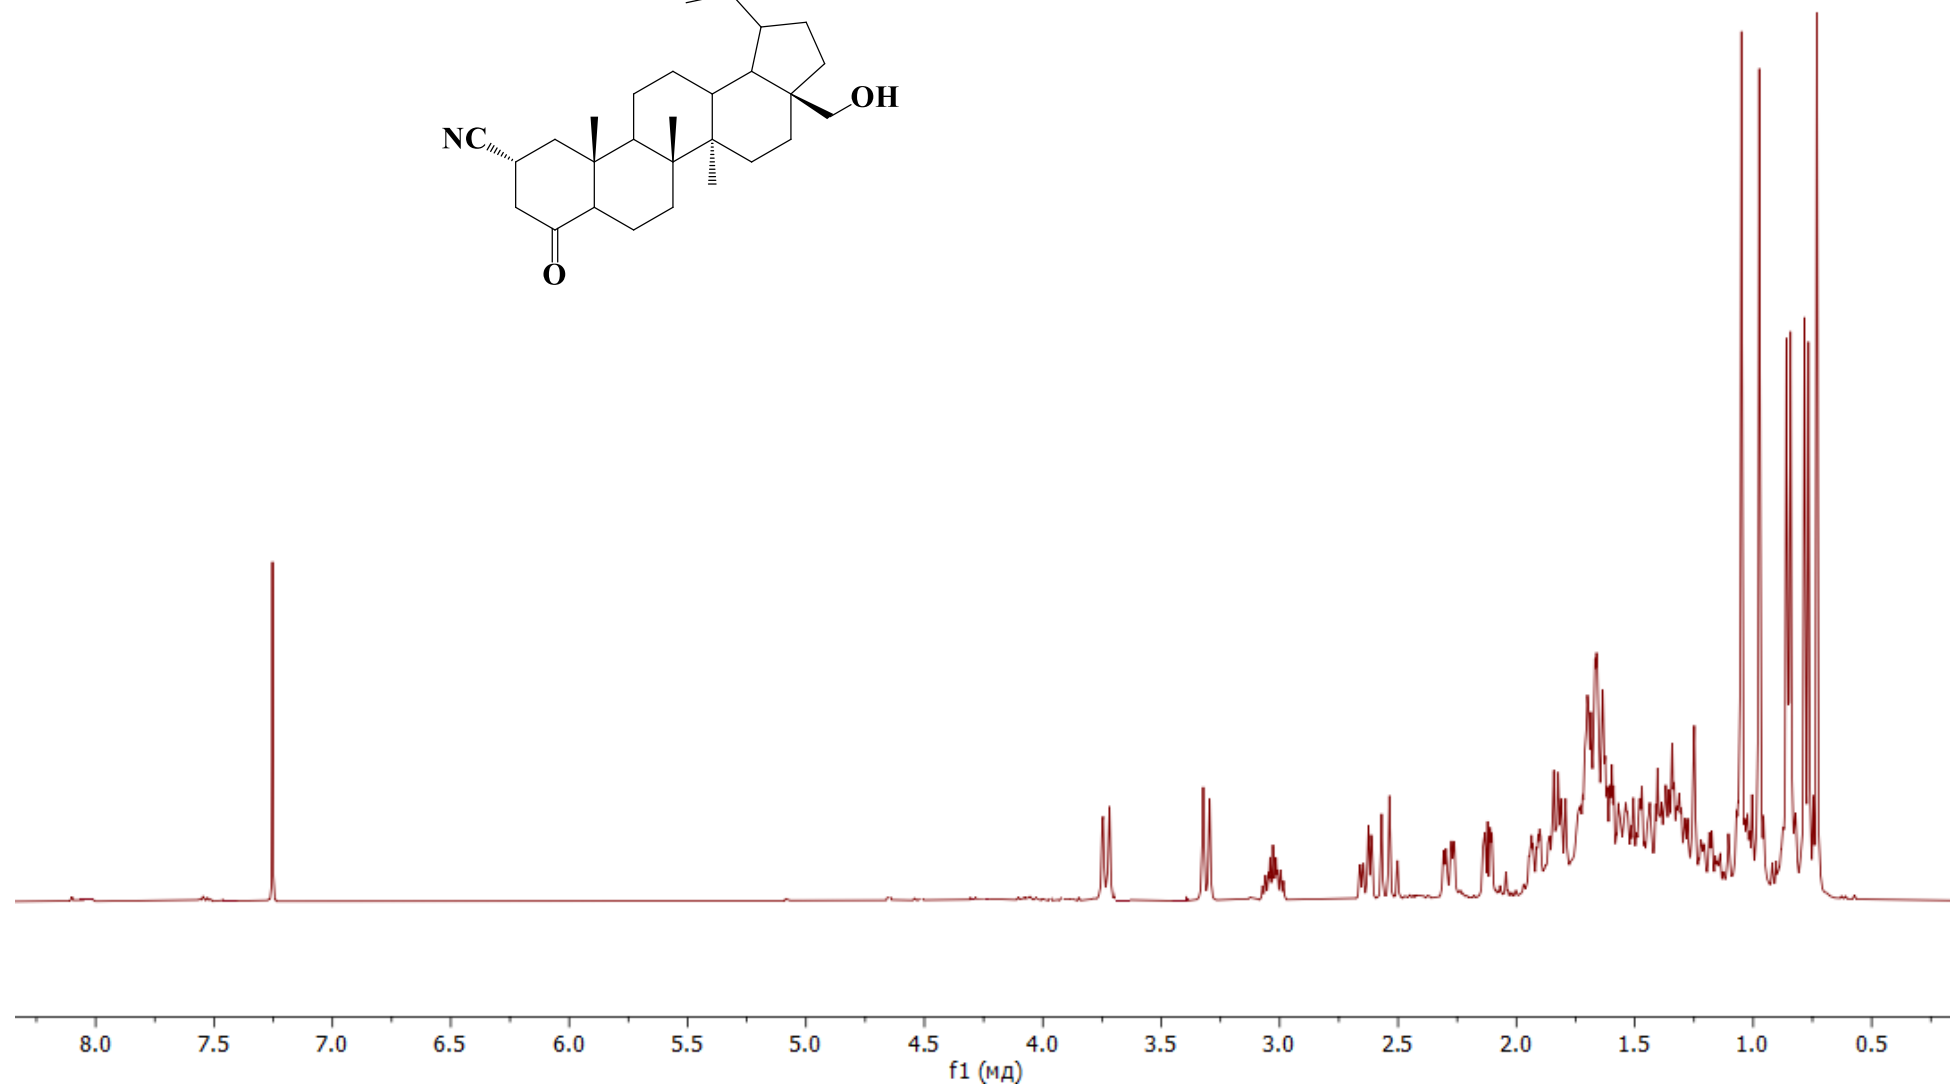



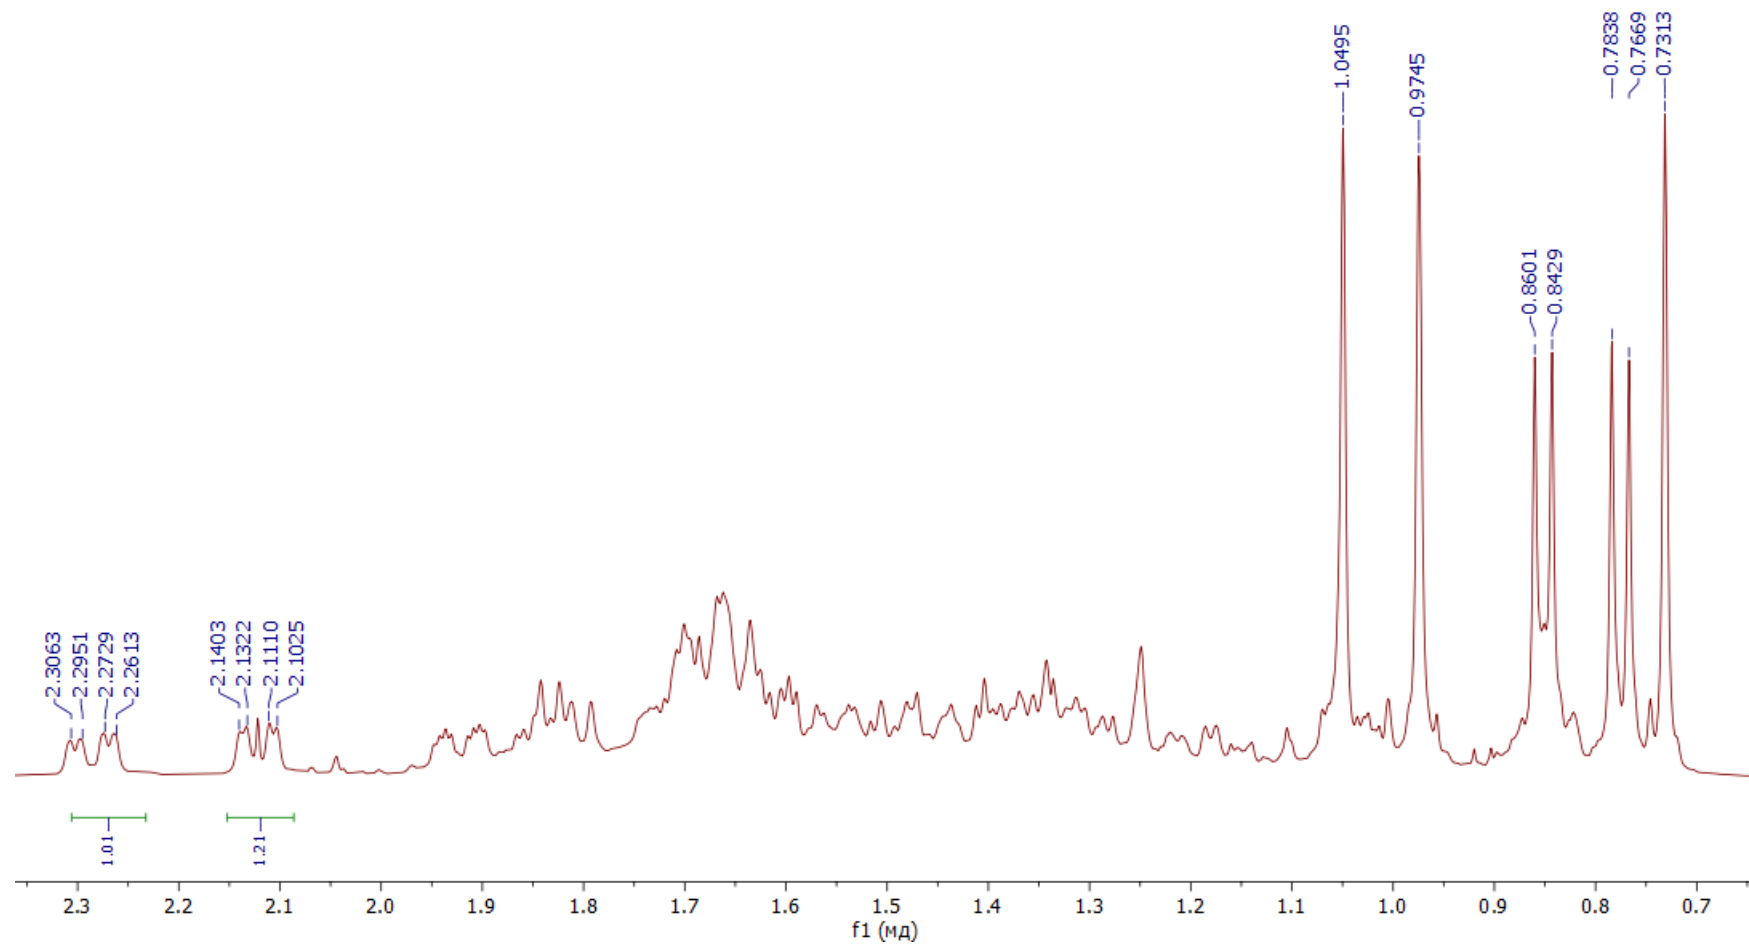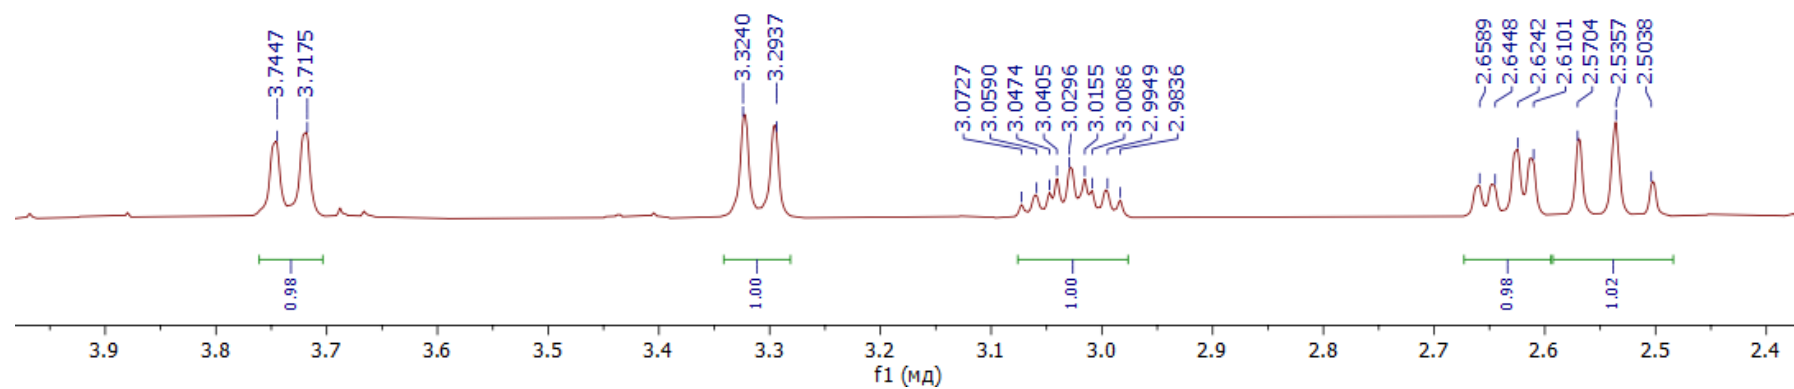

$^{13}\text{C}$  NMR spectra of 2-Cyano-28-hydroxy-4-oxo-3,23-dinorlupan (16).

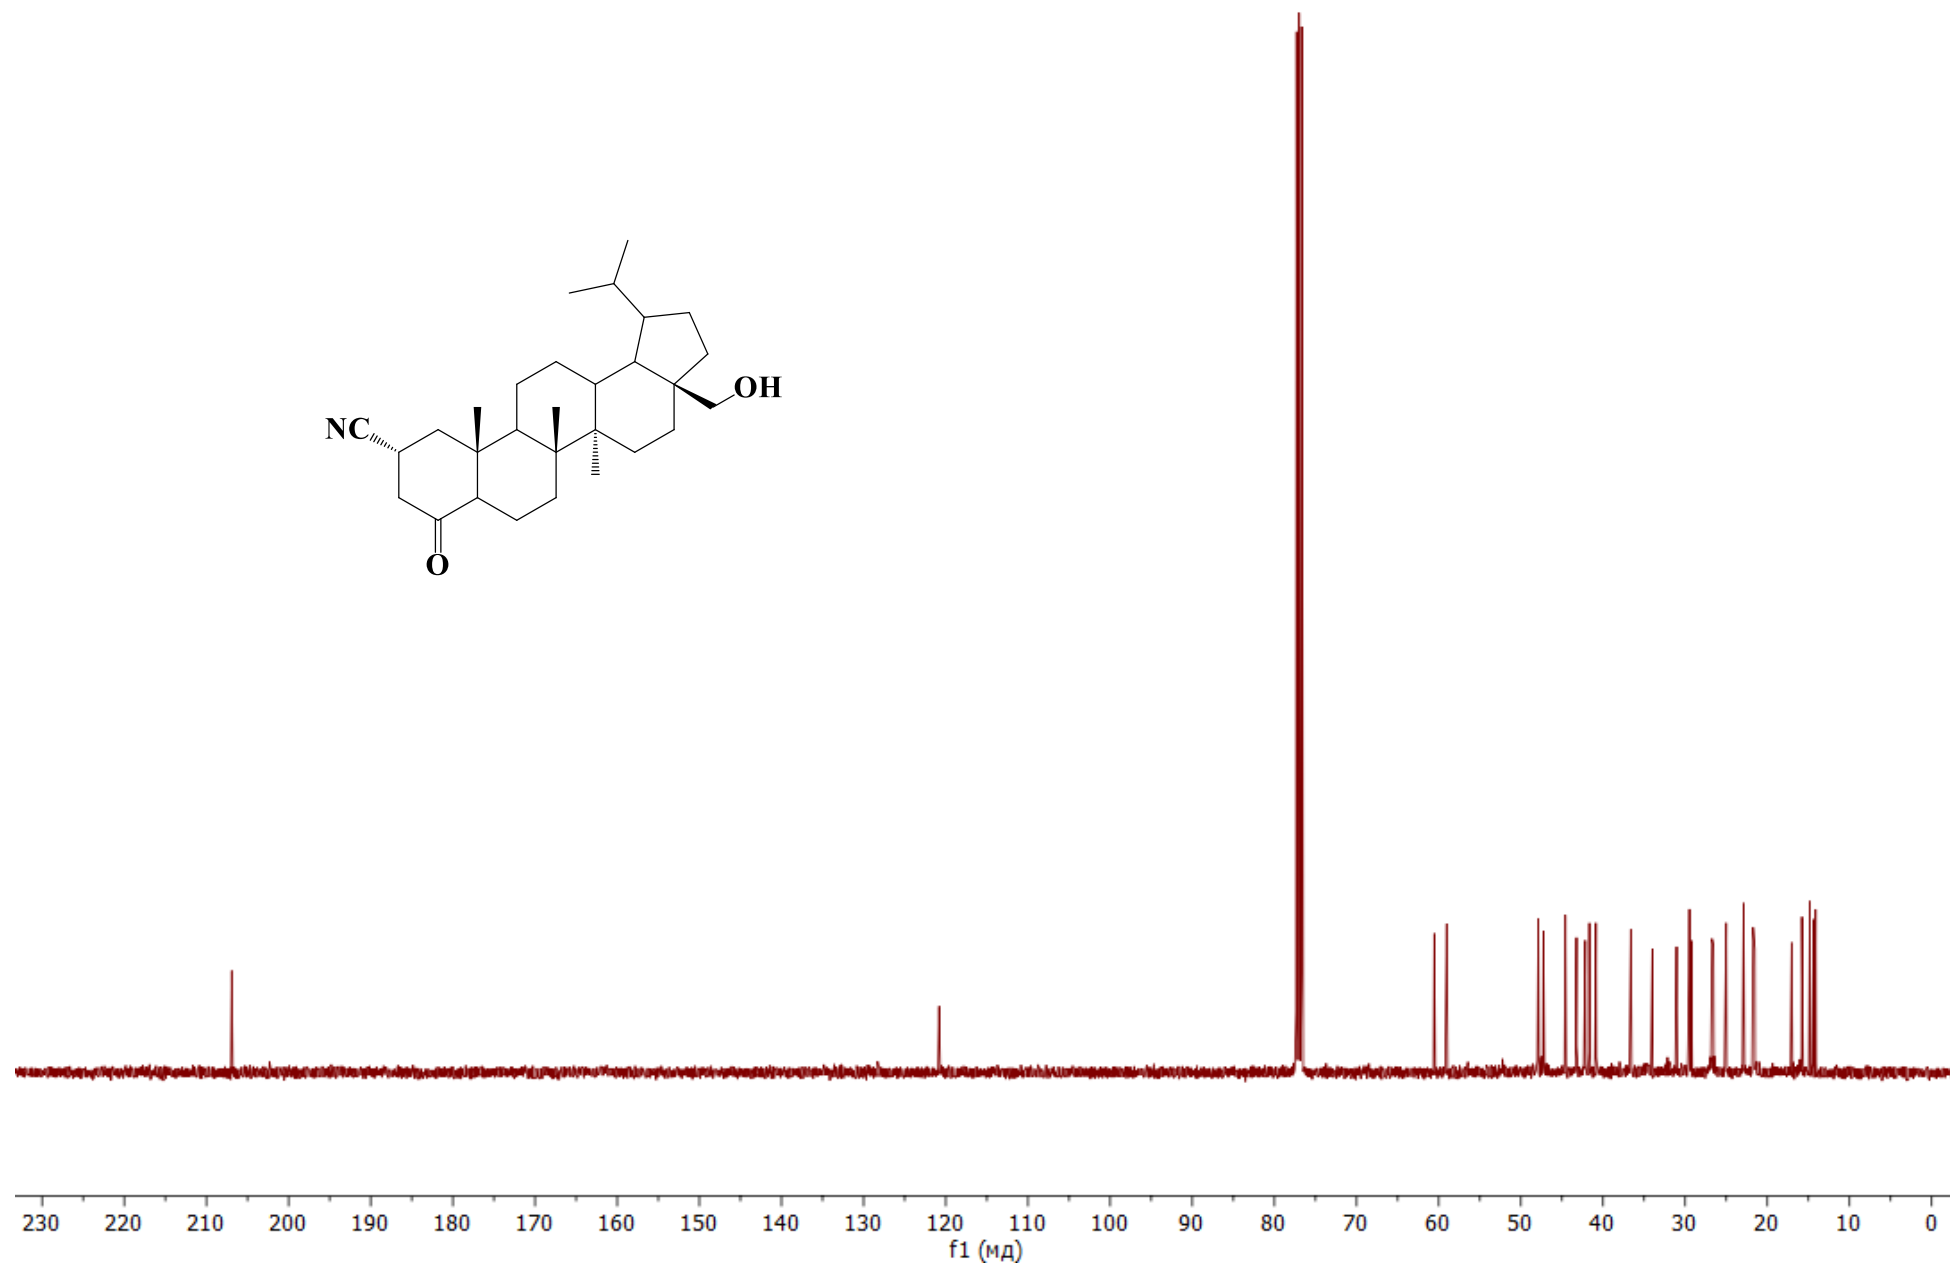

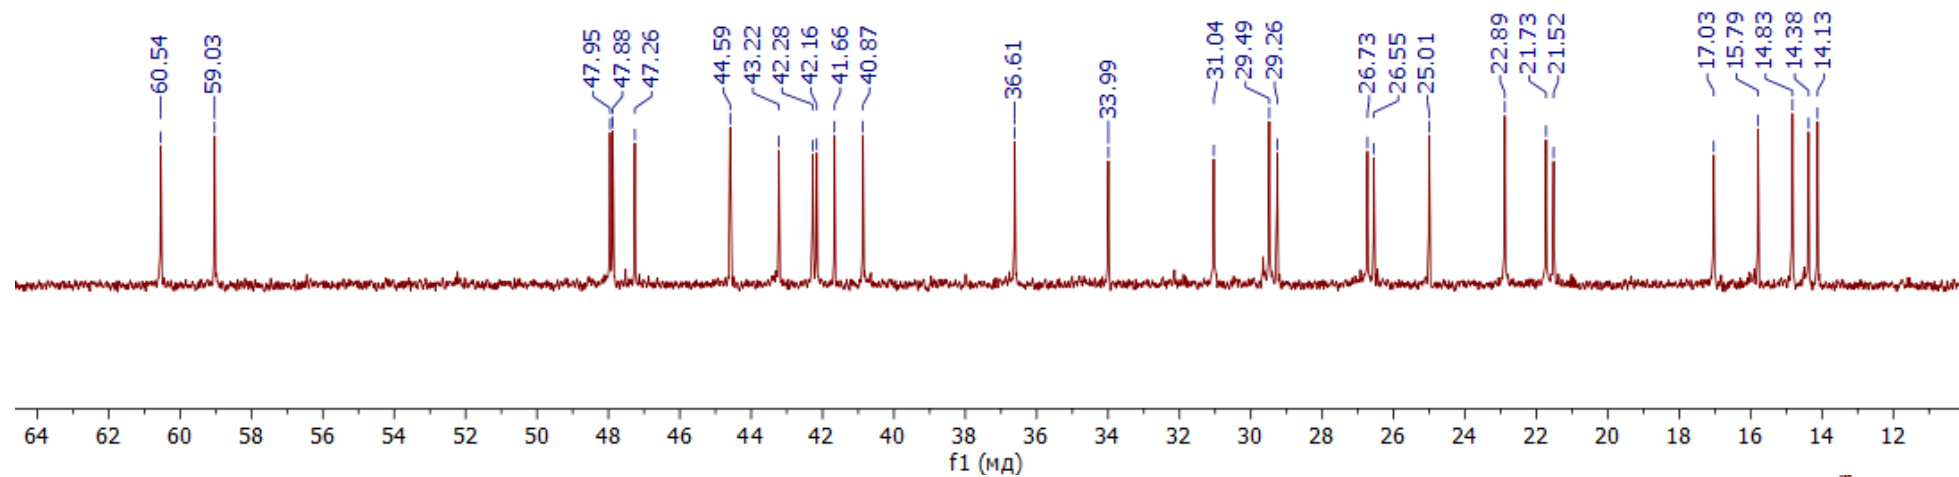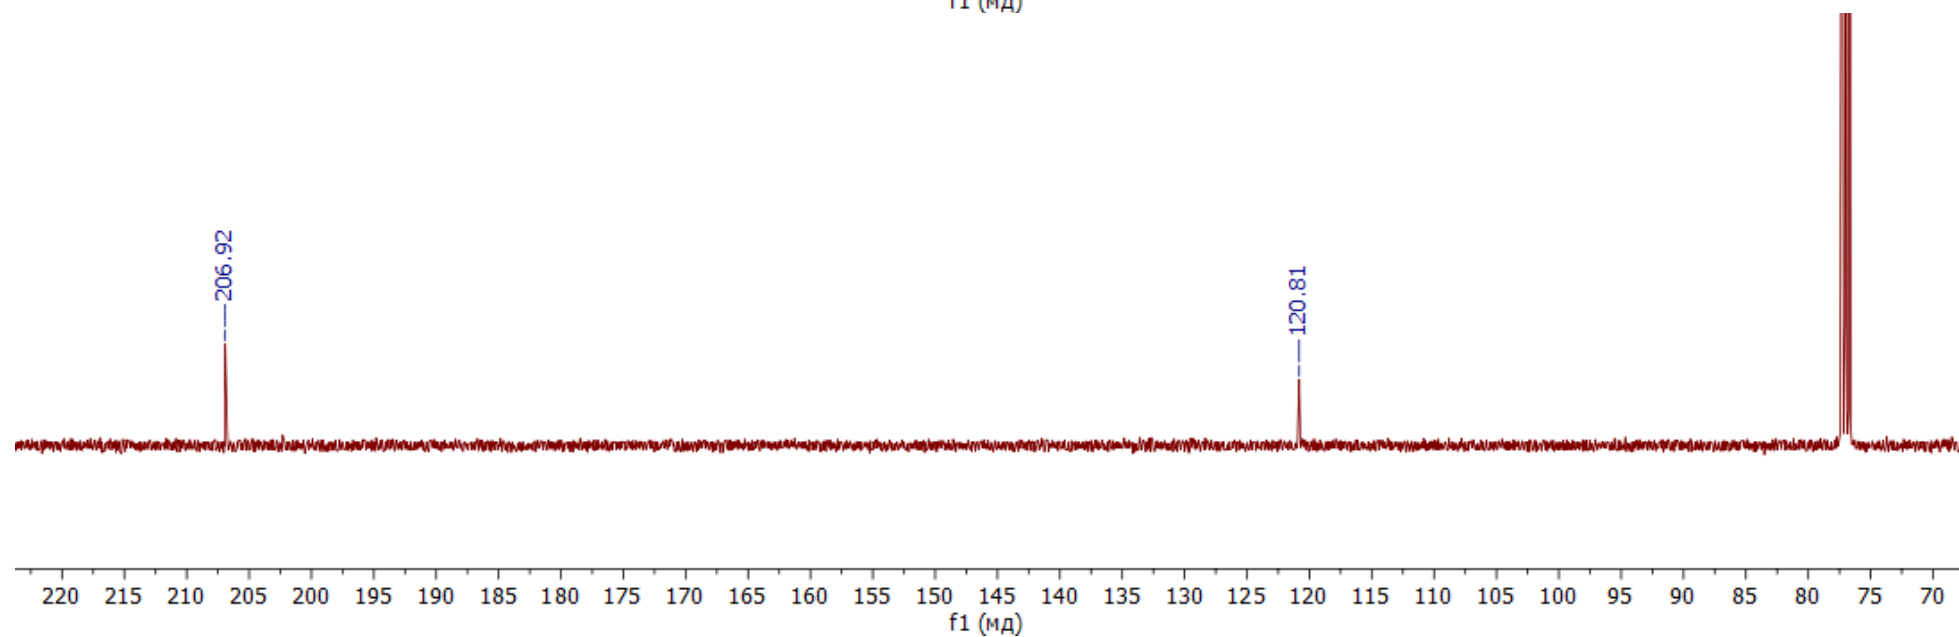

$^1\text{H}$  NMR spectra of 2-Cyano-4-oxo-3,23-dinorlupan-28-oic acid methyl ester (17).

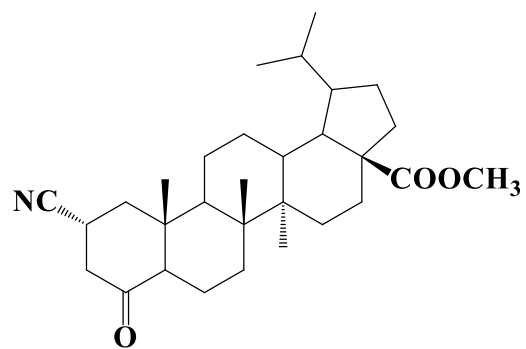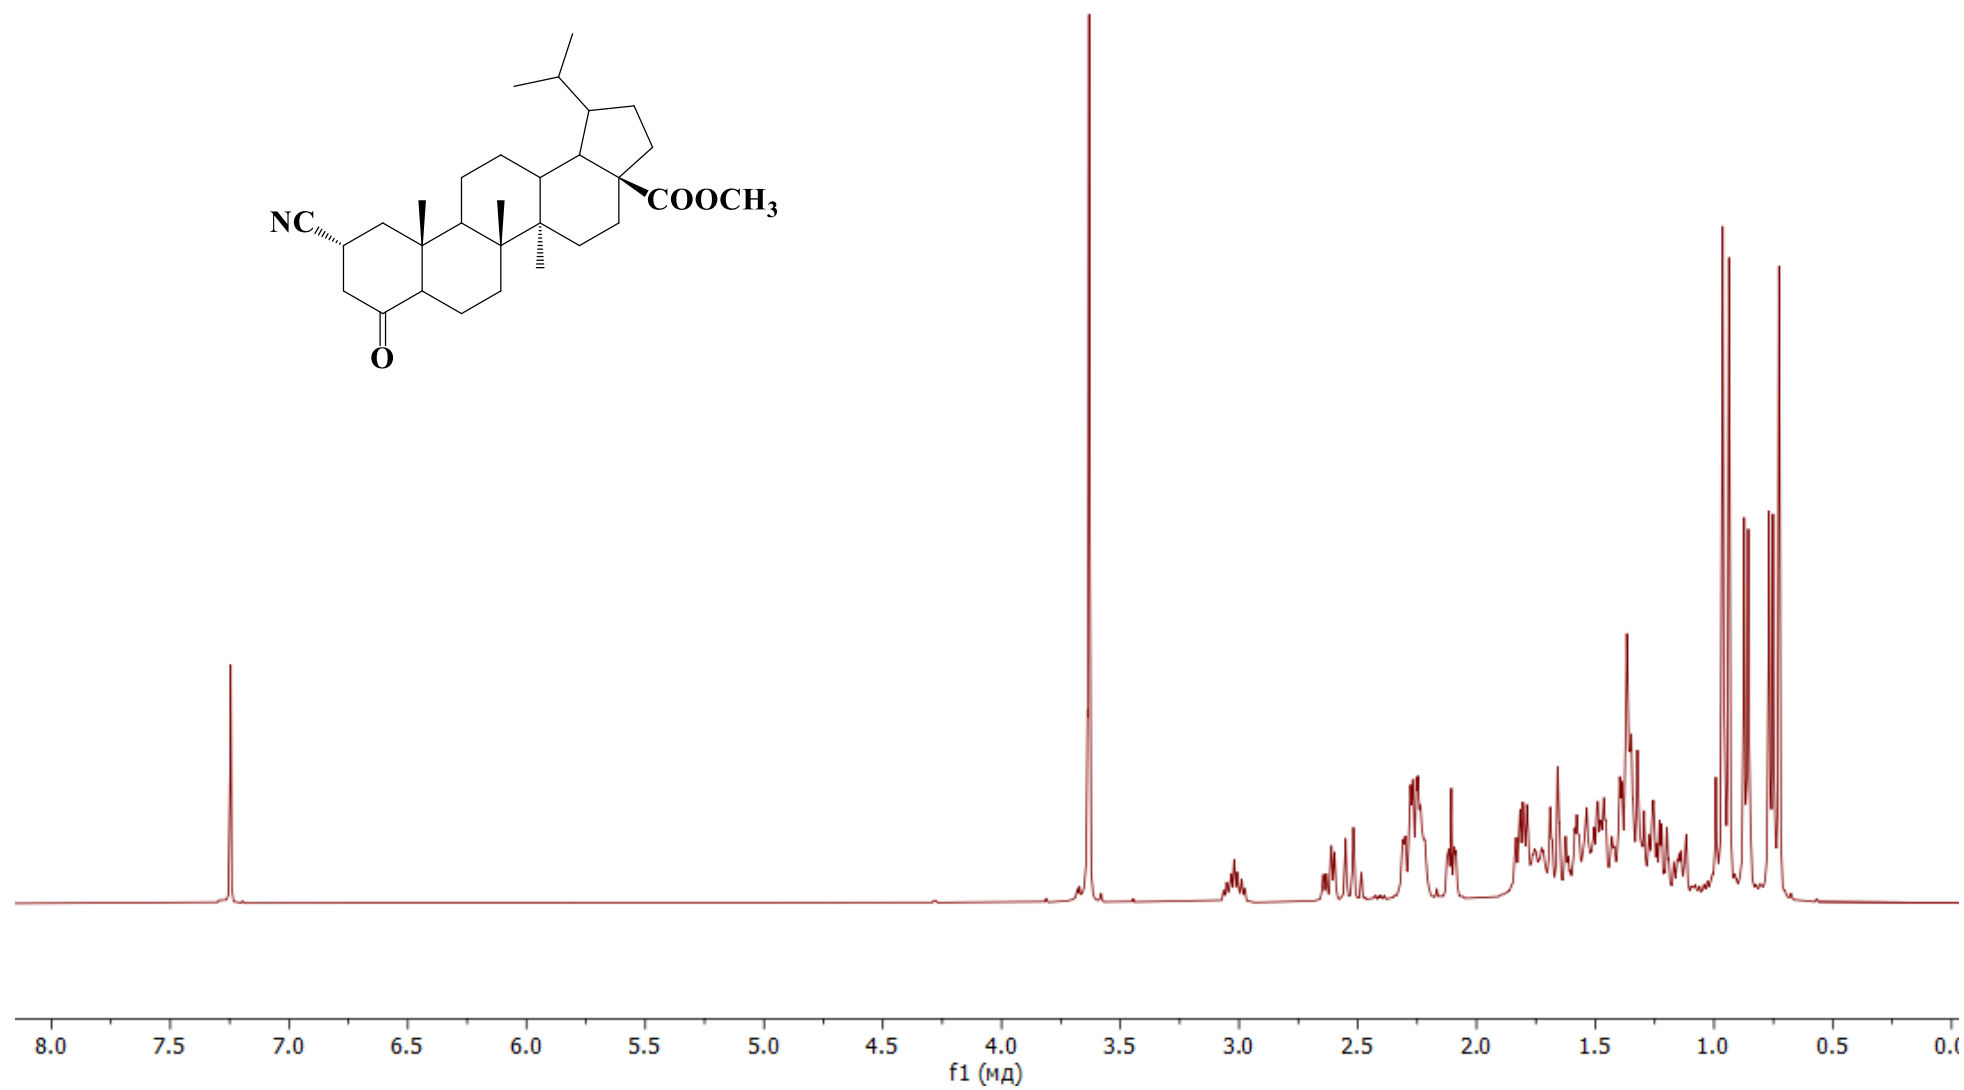

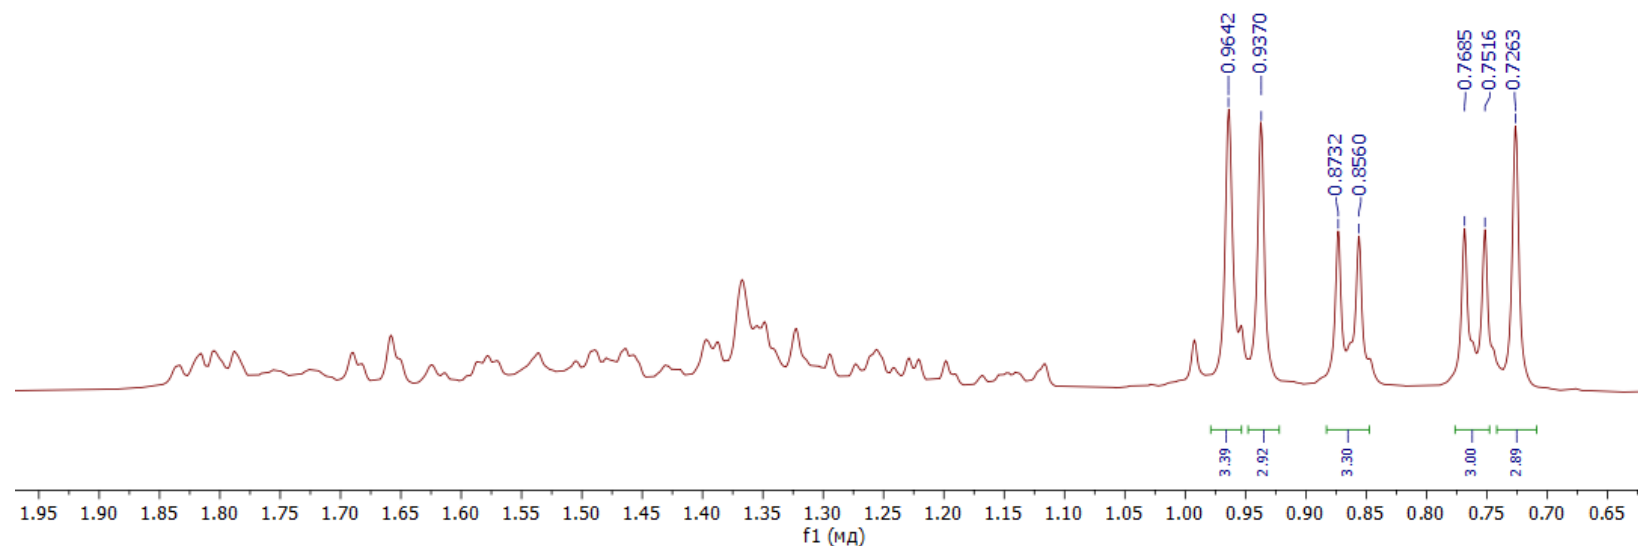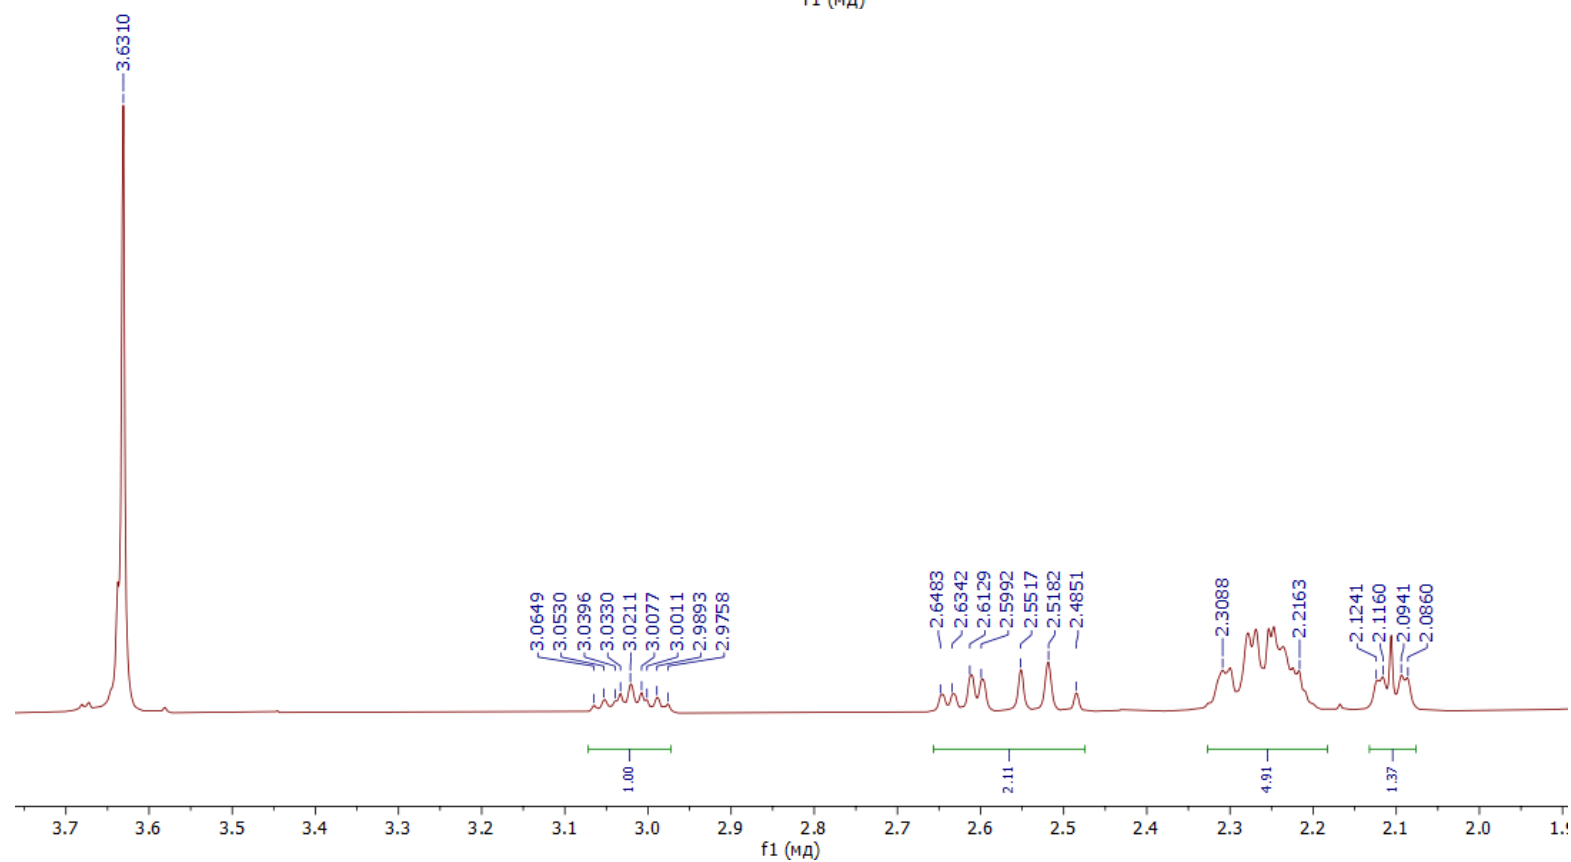

$^{13}\text{C}$  NMR spectra of 2-Cyano-4-oxo-3,23-dinorlupan-28-oic acid methyl ester (17).

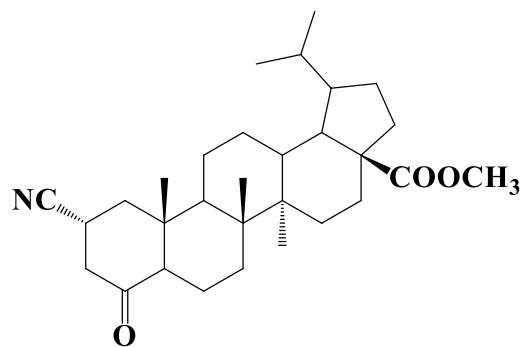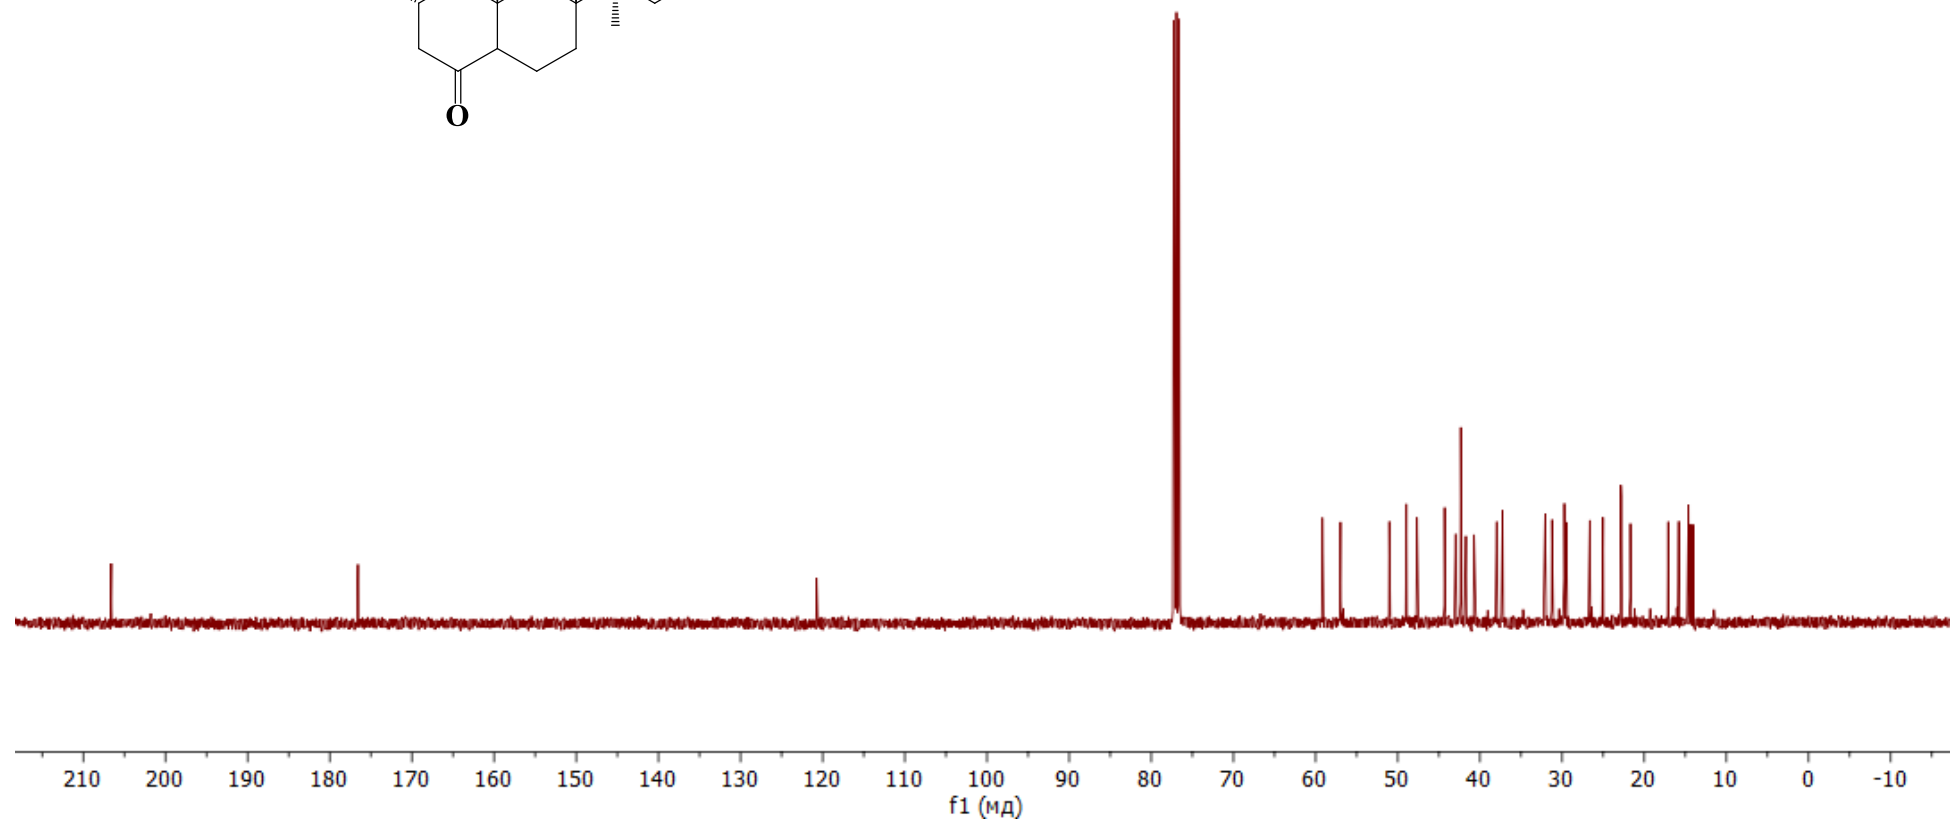

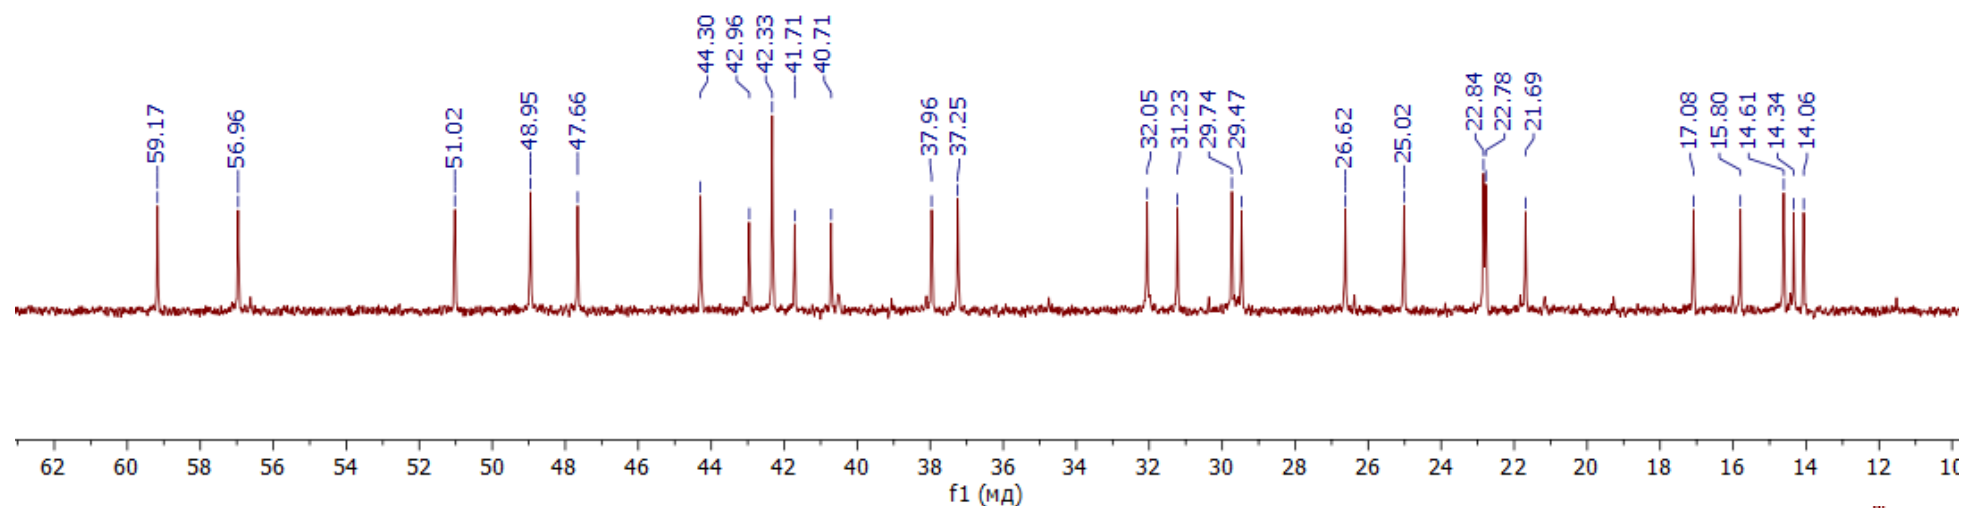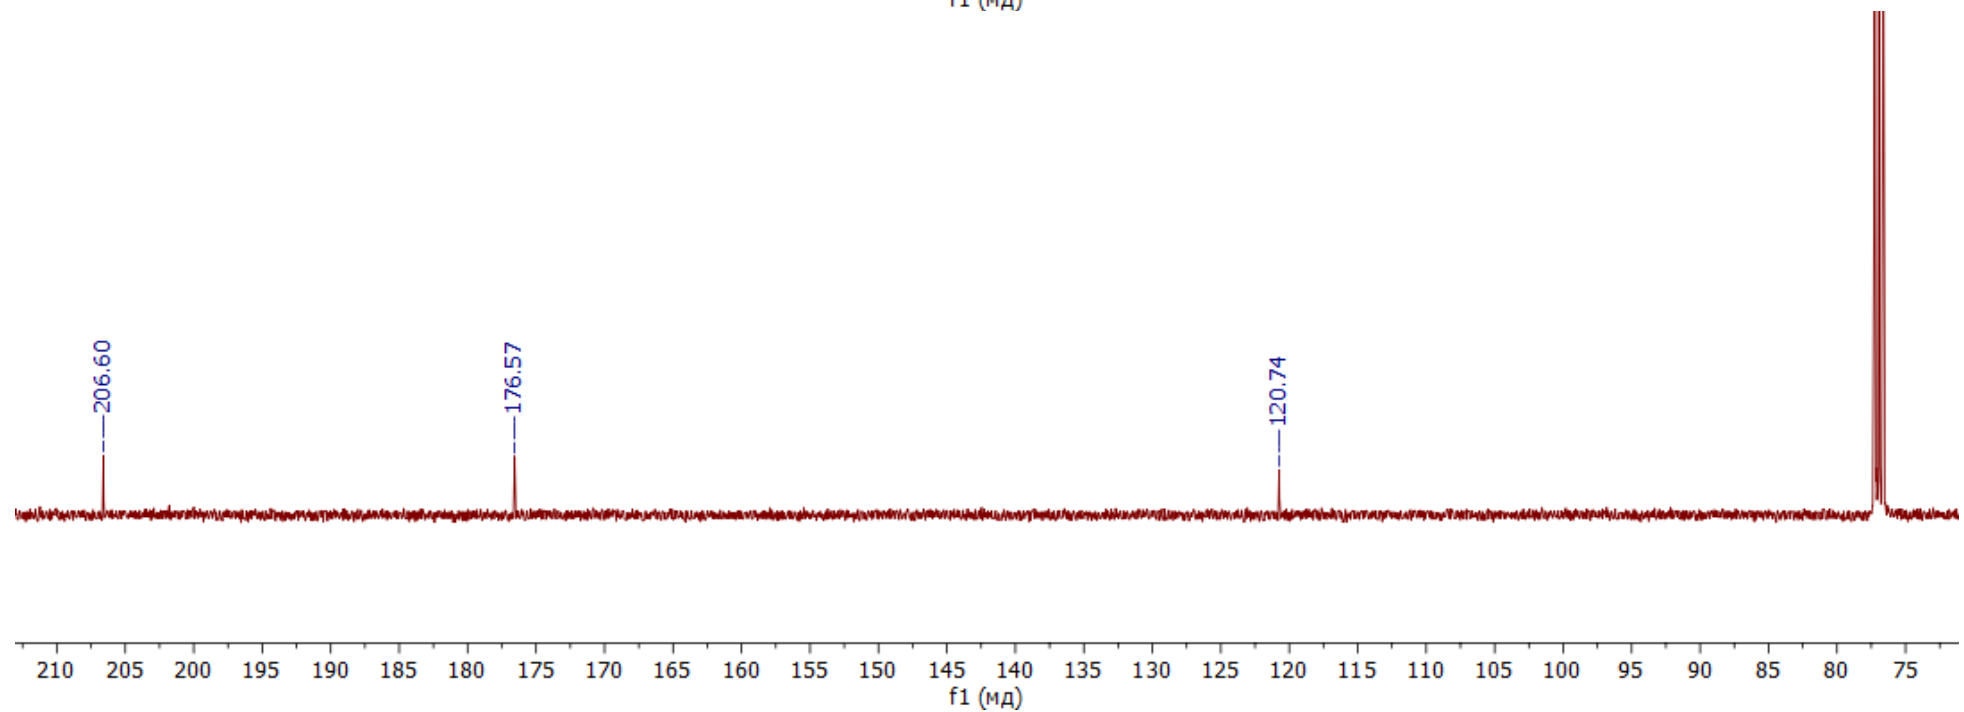

$^1\text{H}$  NMR spectra of 2-Cyano-4,28-dihydroxy-3,23-dinorlupan (18).

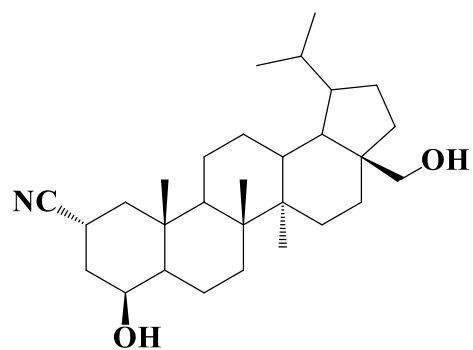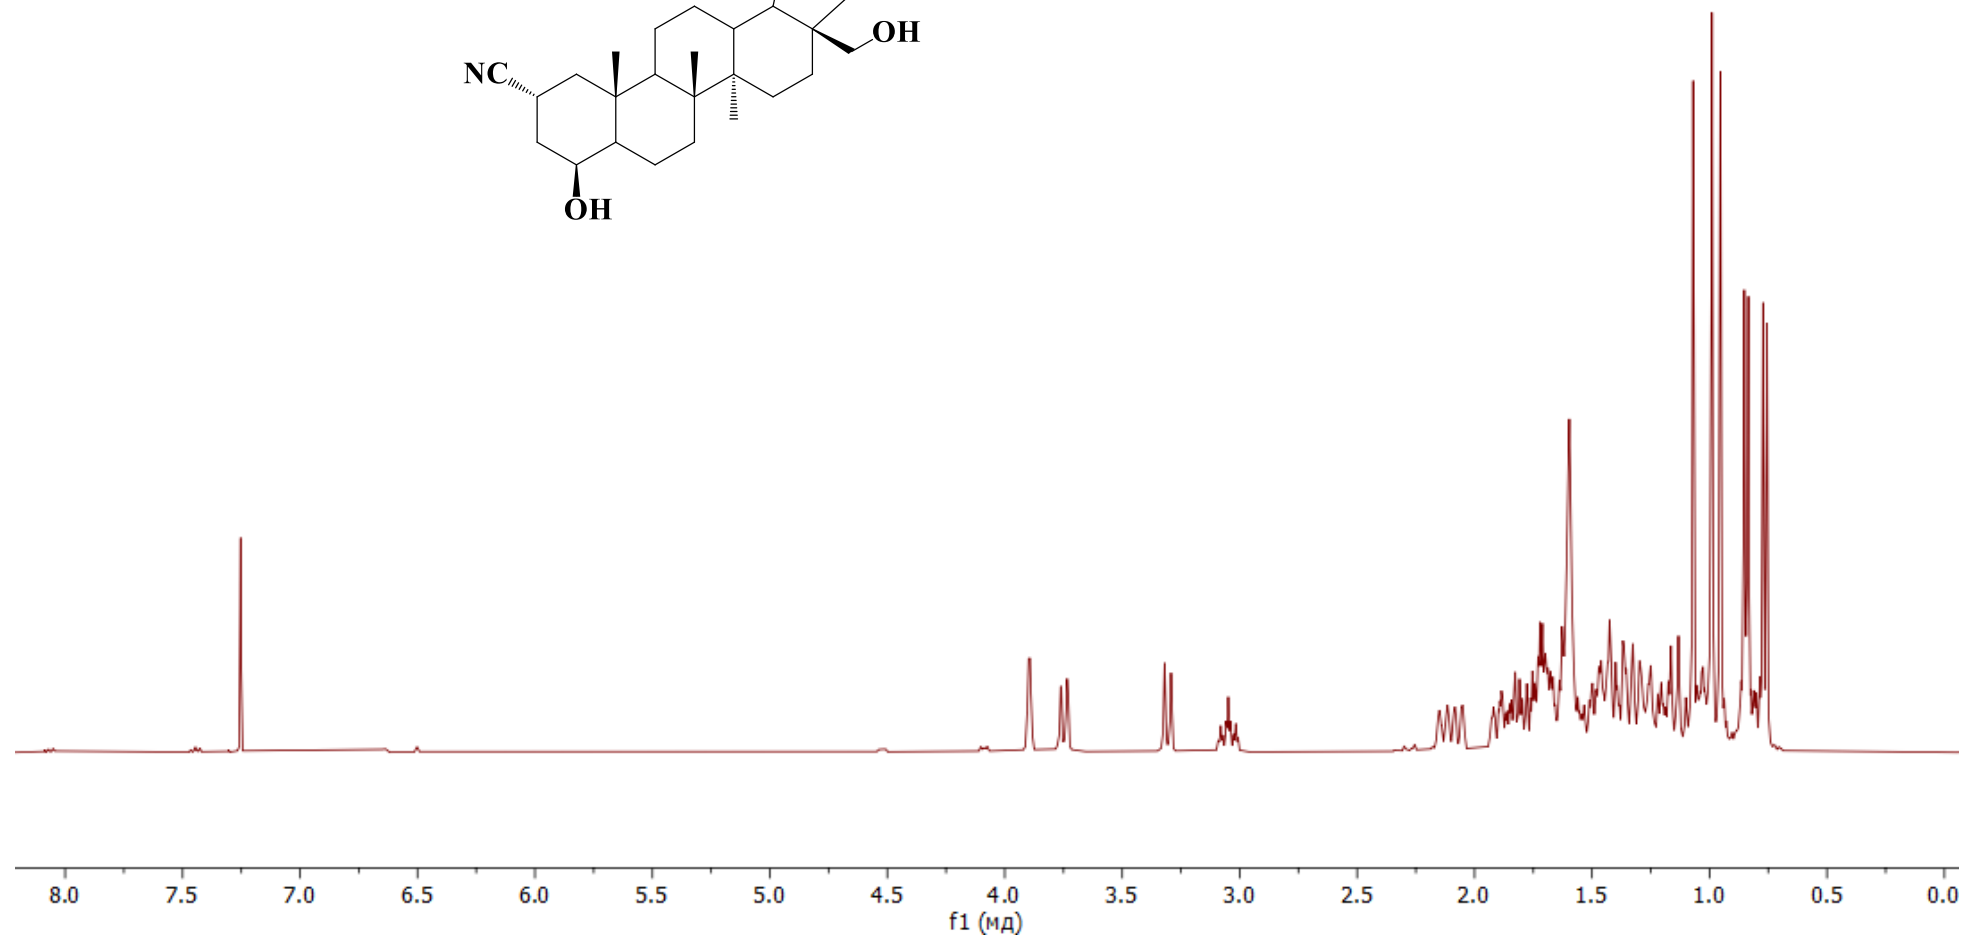



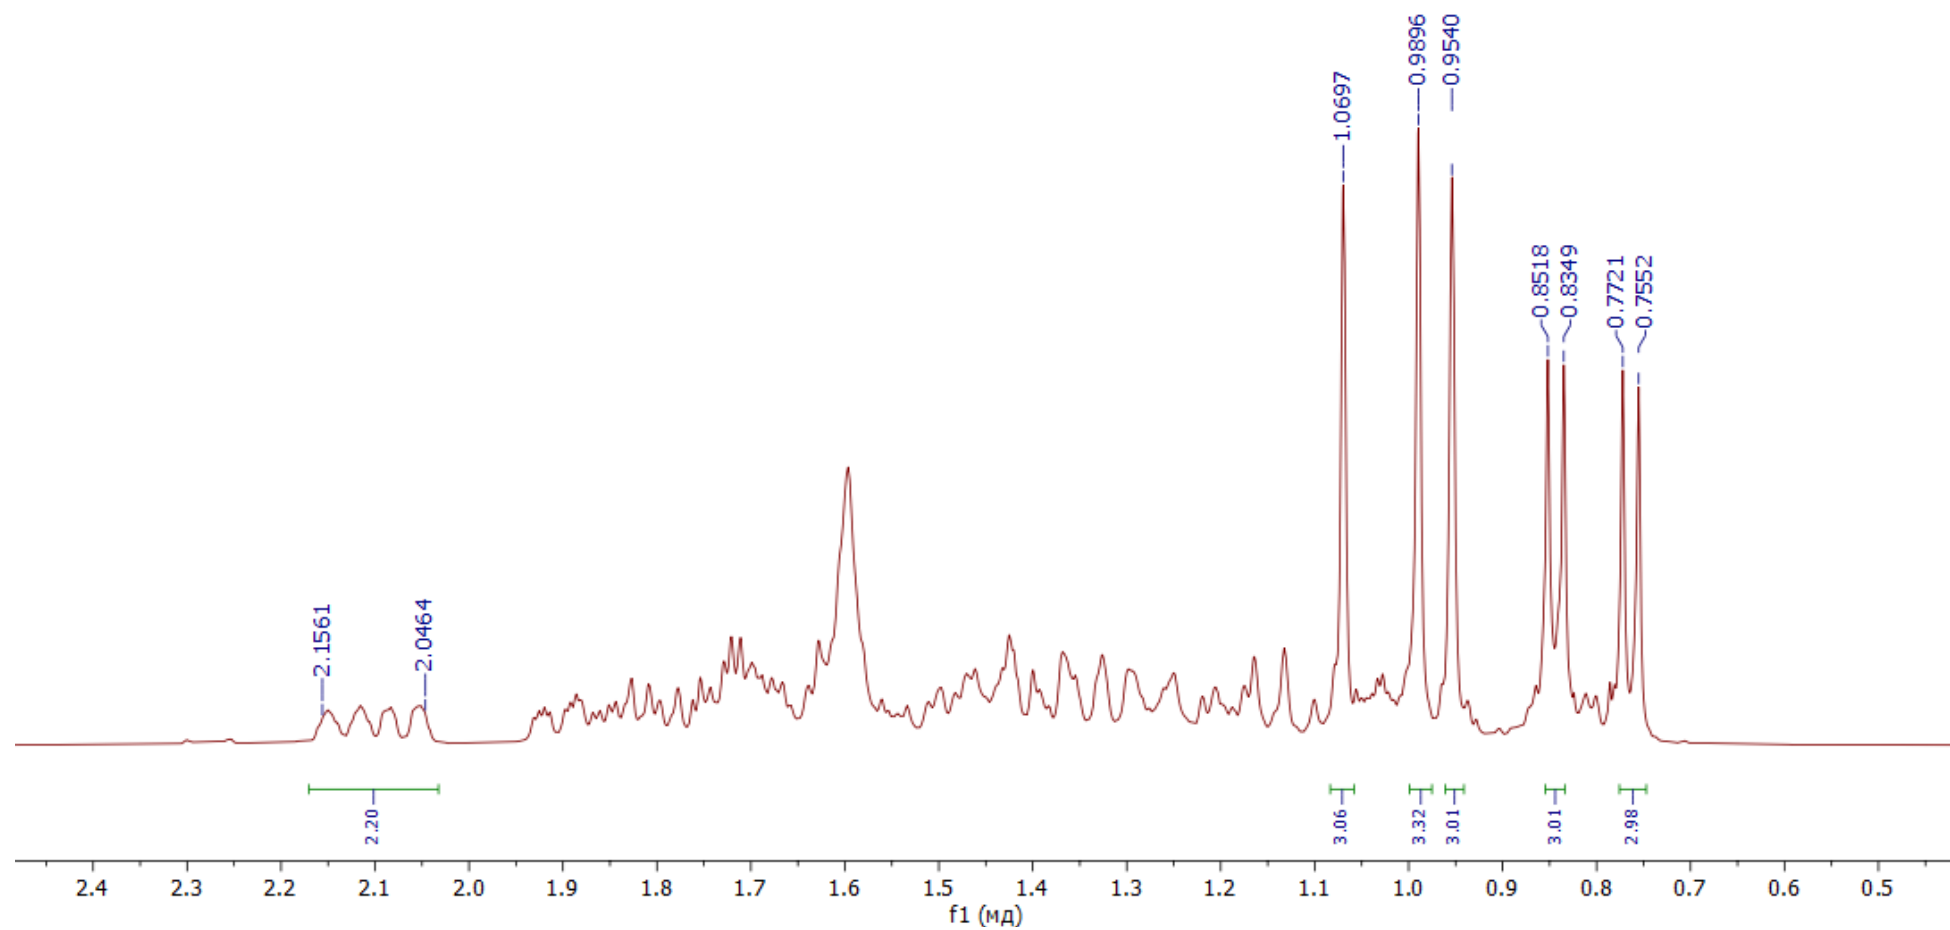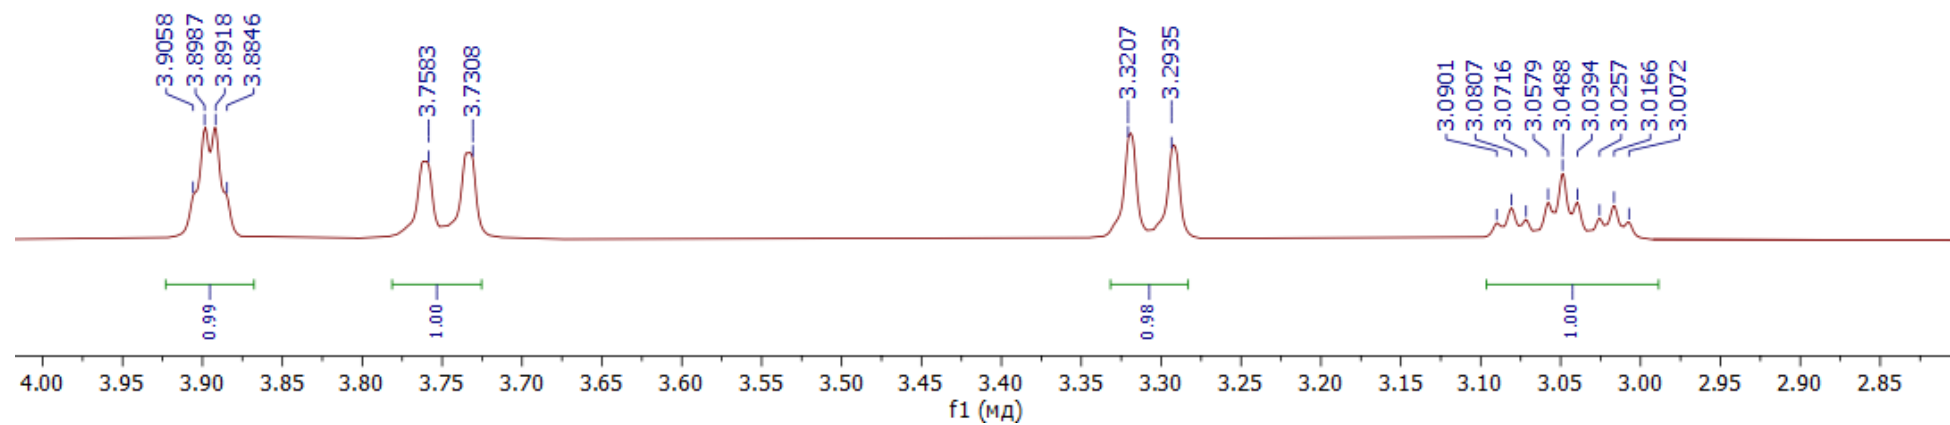

$^{13}\text{C}$  NMR spectra of 2-Cyano-4,28-dihydroxy-3,23-dinorlupan (18).

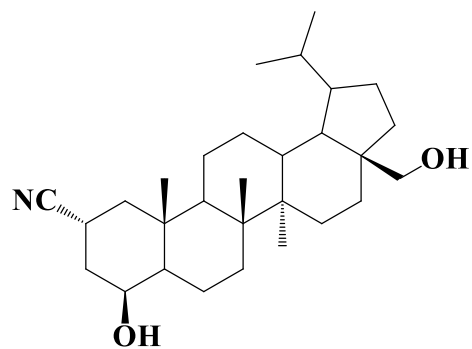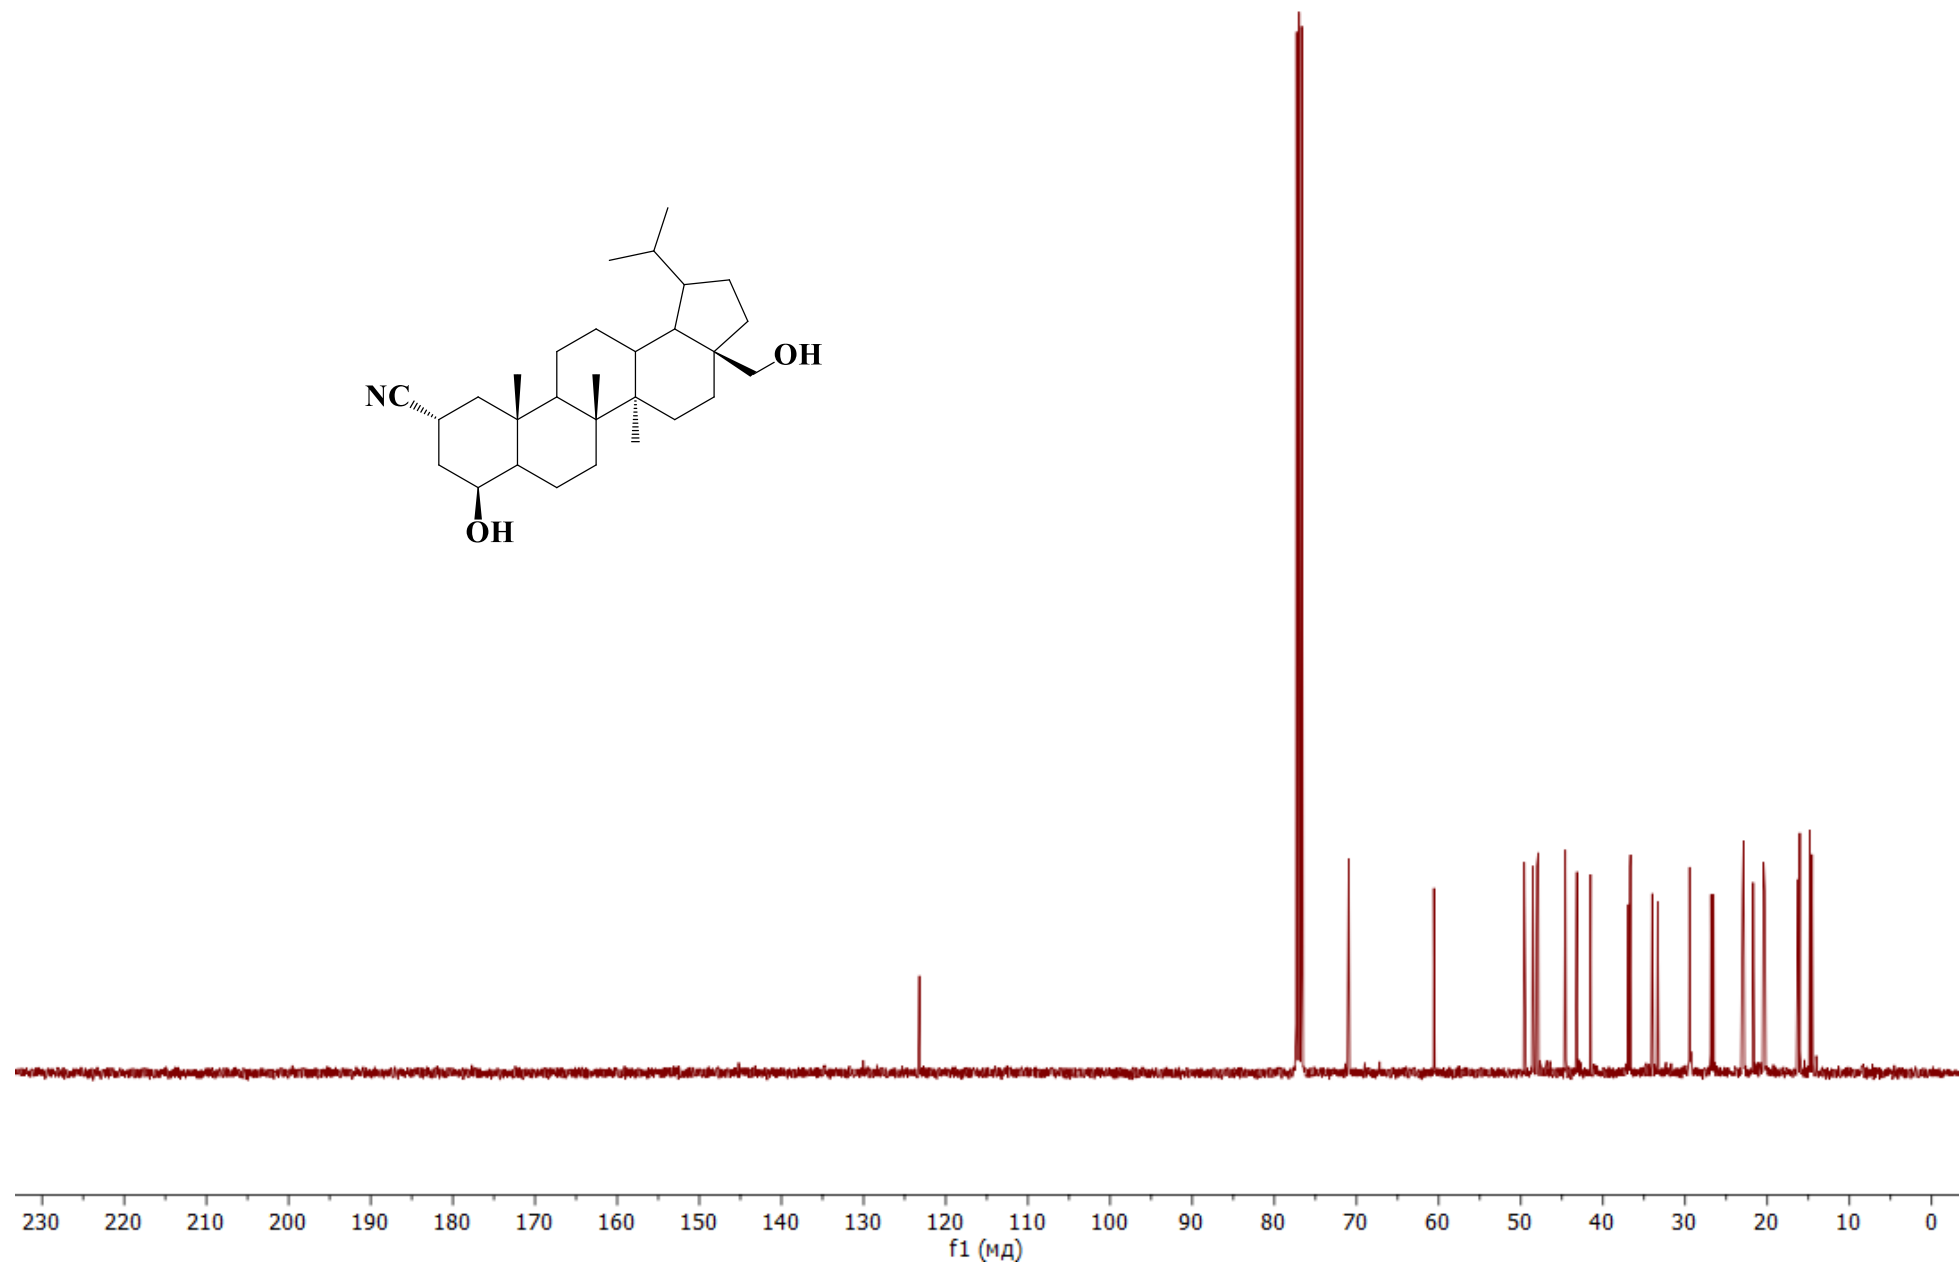

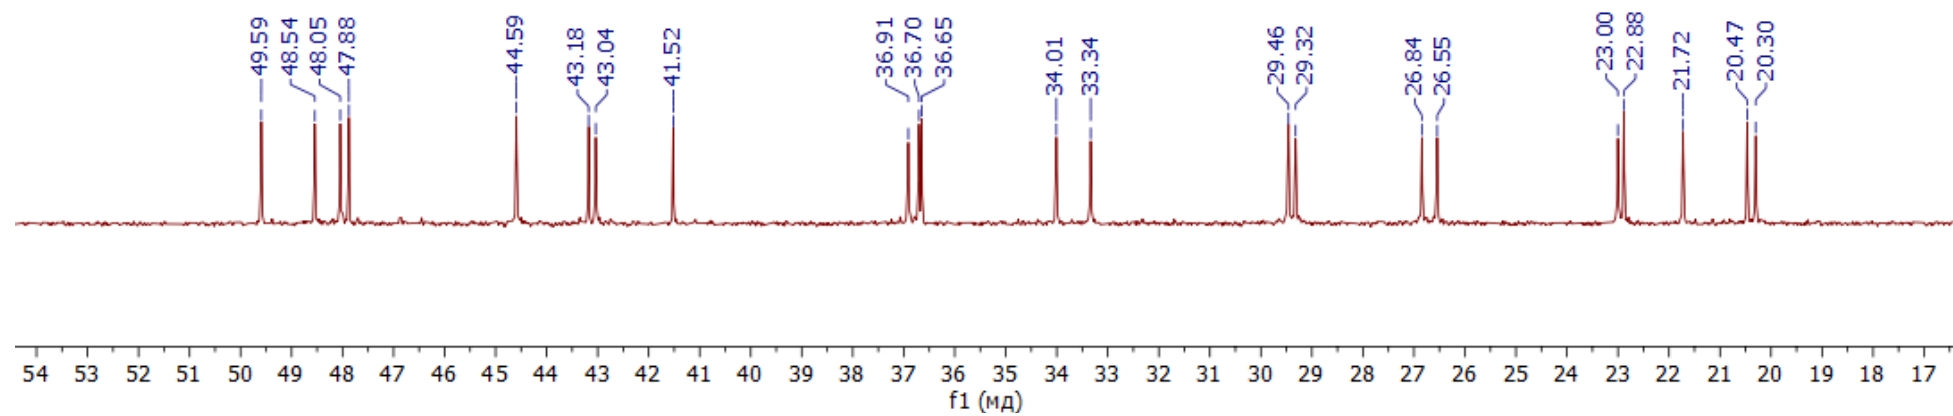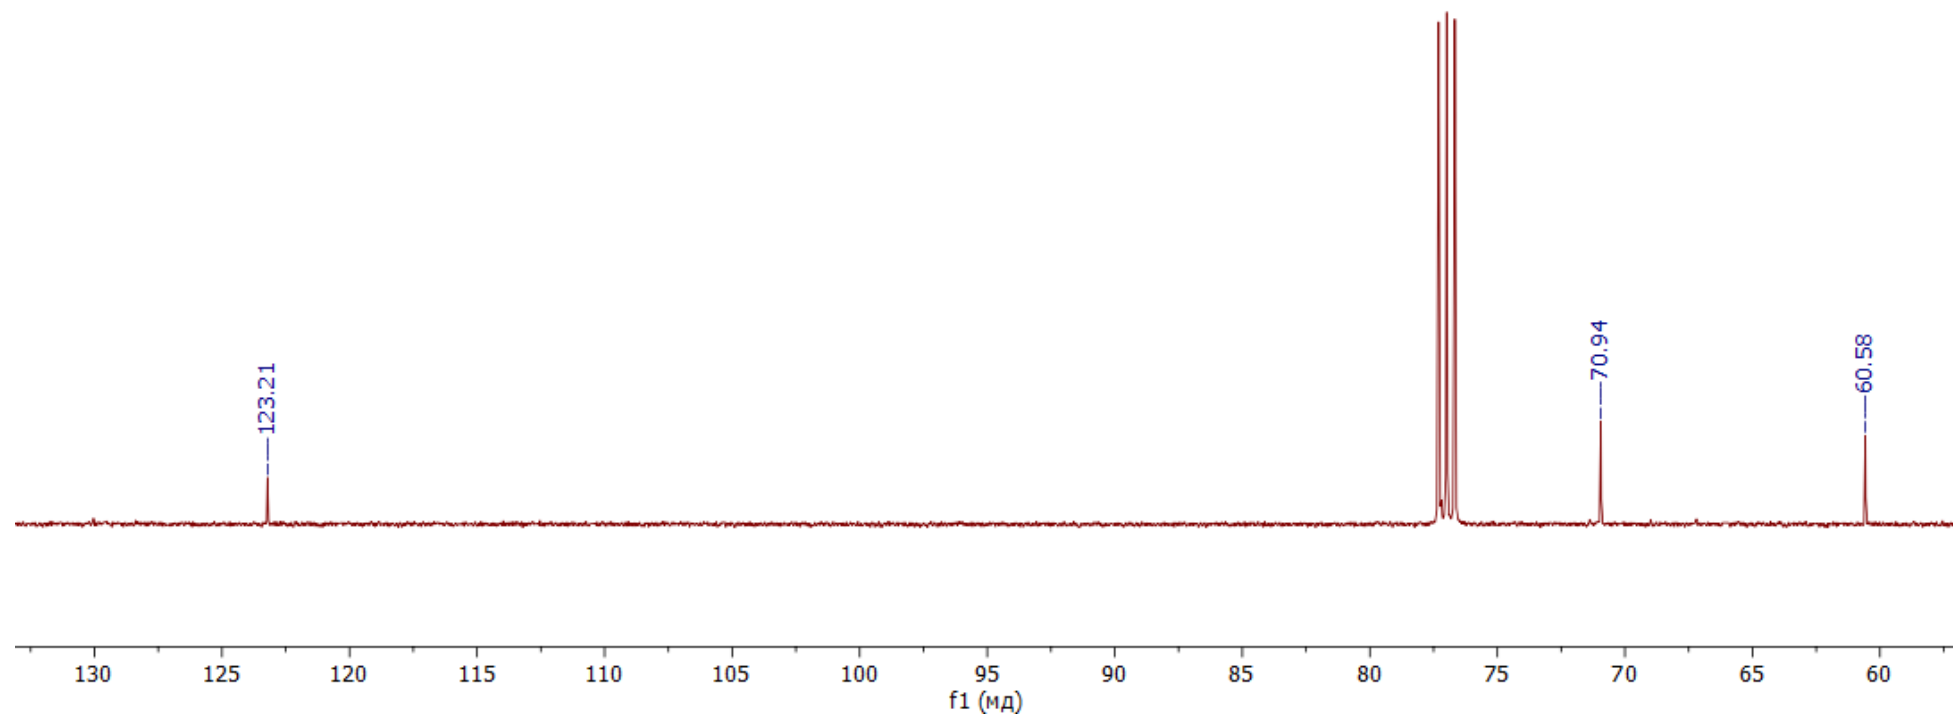

$^1\text{H}$  NMR spectra of 2-Cyano-4-hydroxy-3,23-dinorlupan-28-oic acid methyl ester (19).

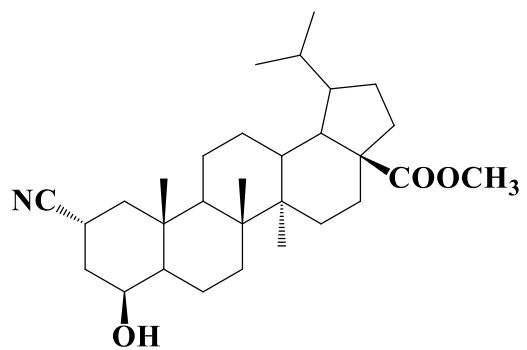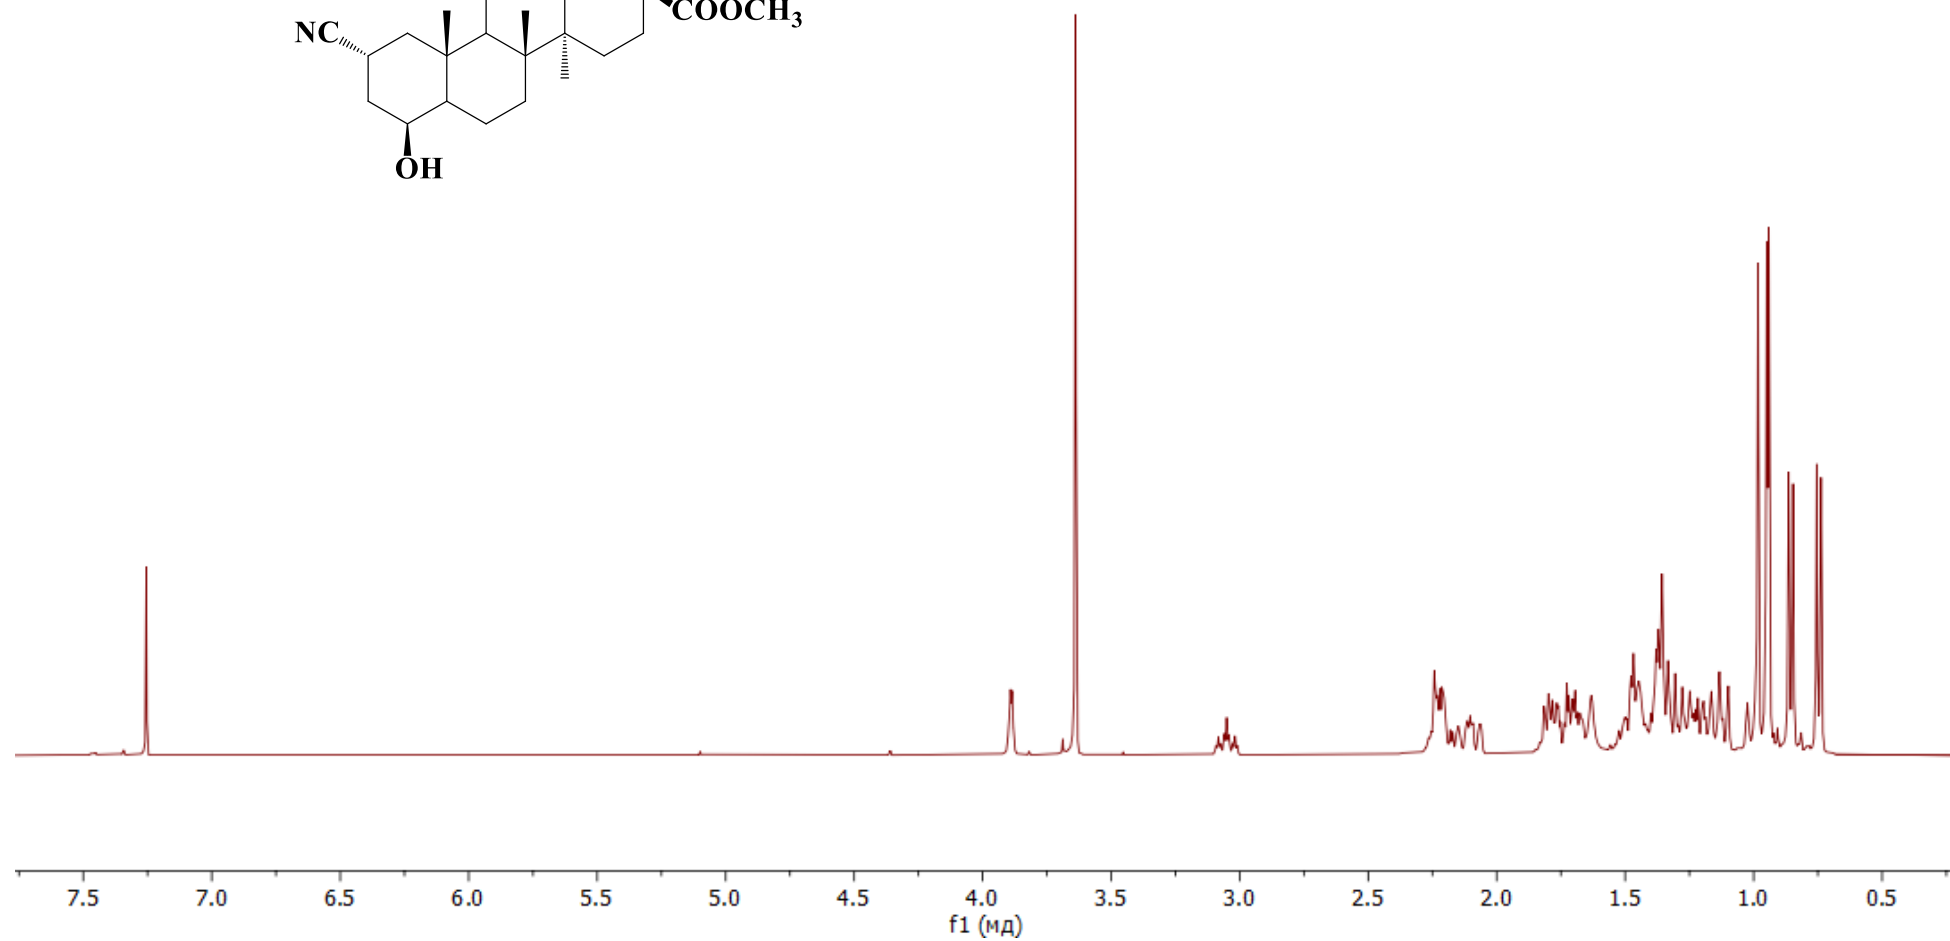

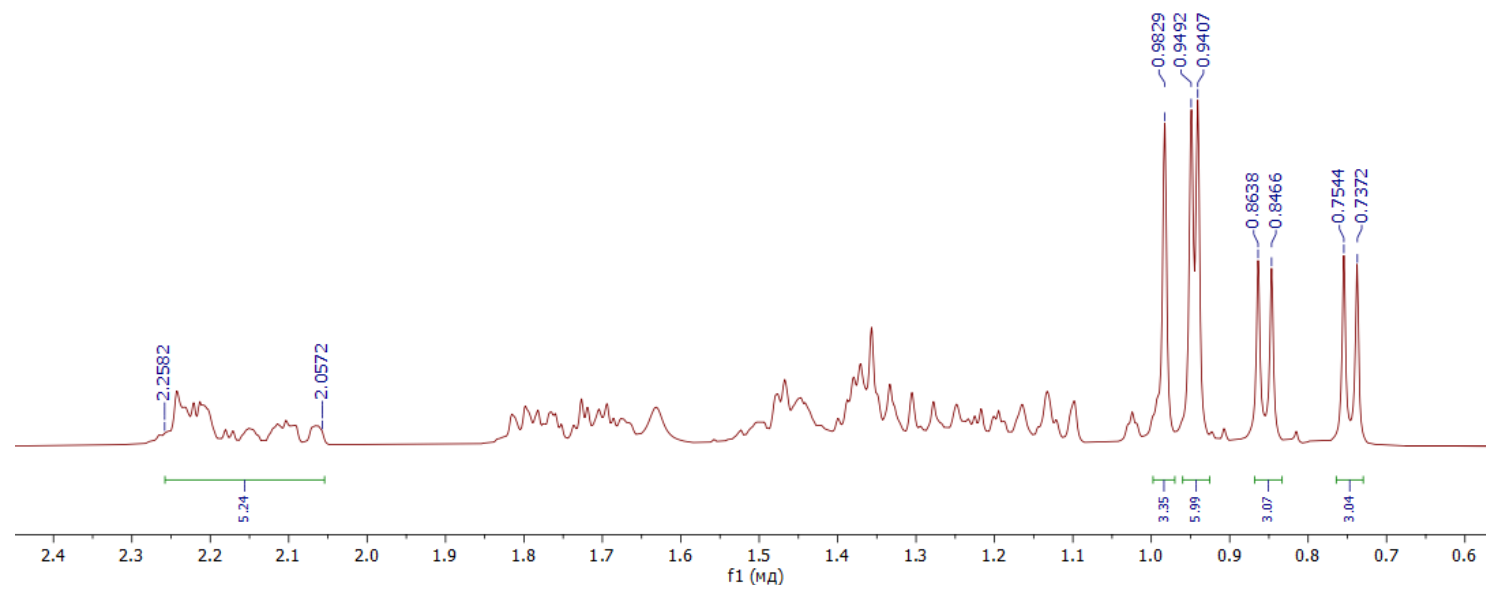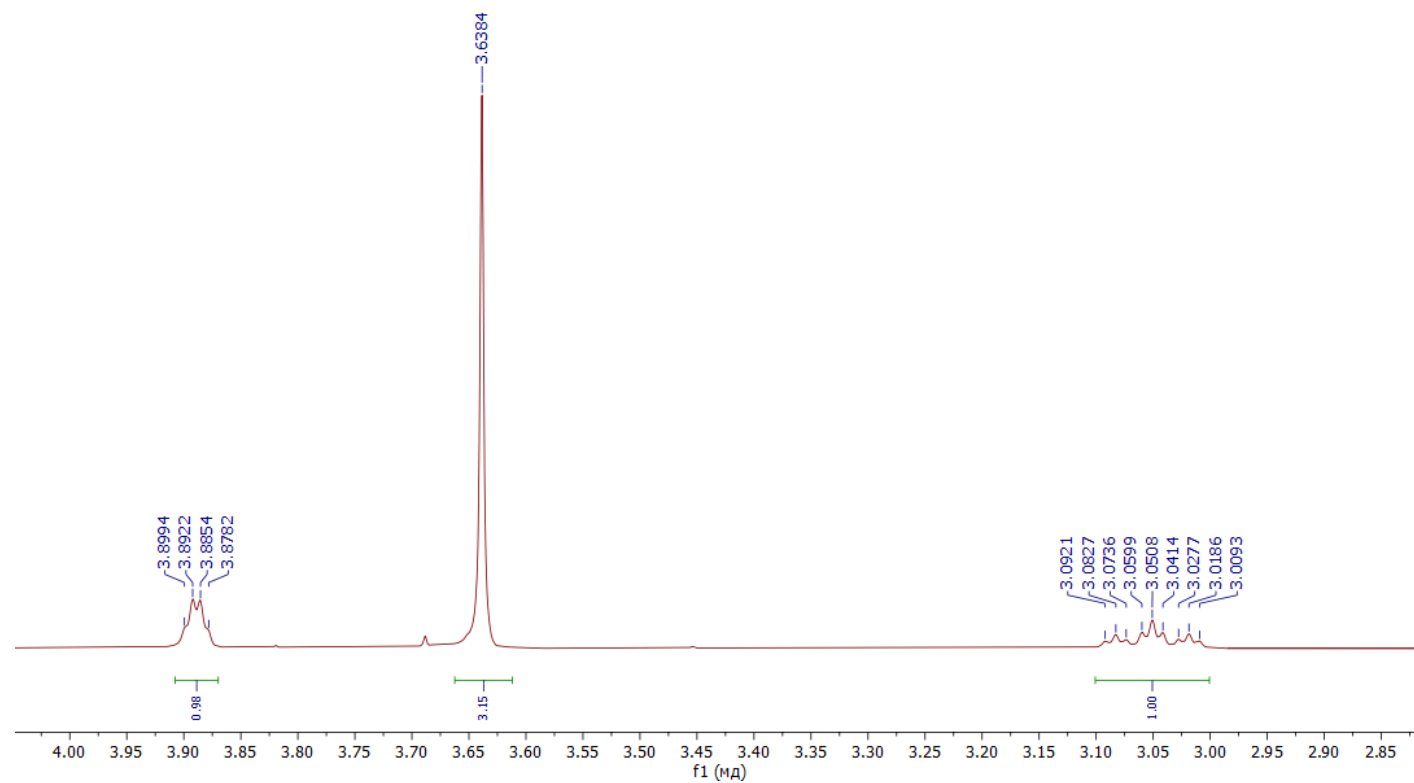

$^{13}\text{C}$  NMR spectra of 2-Cyano-4-hydroxy-3,23-dinorlupan-28-oic acid methyl ester (19).

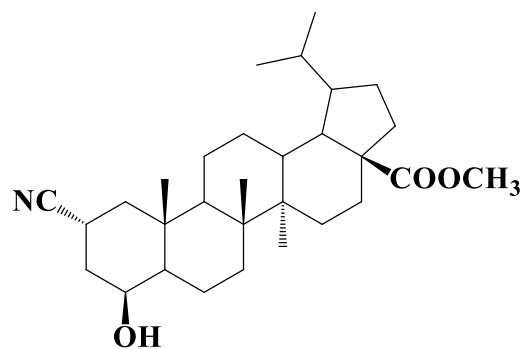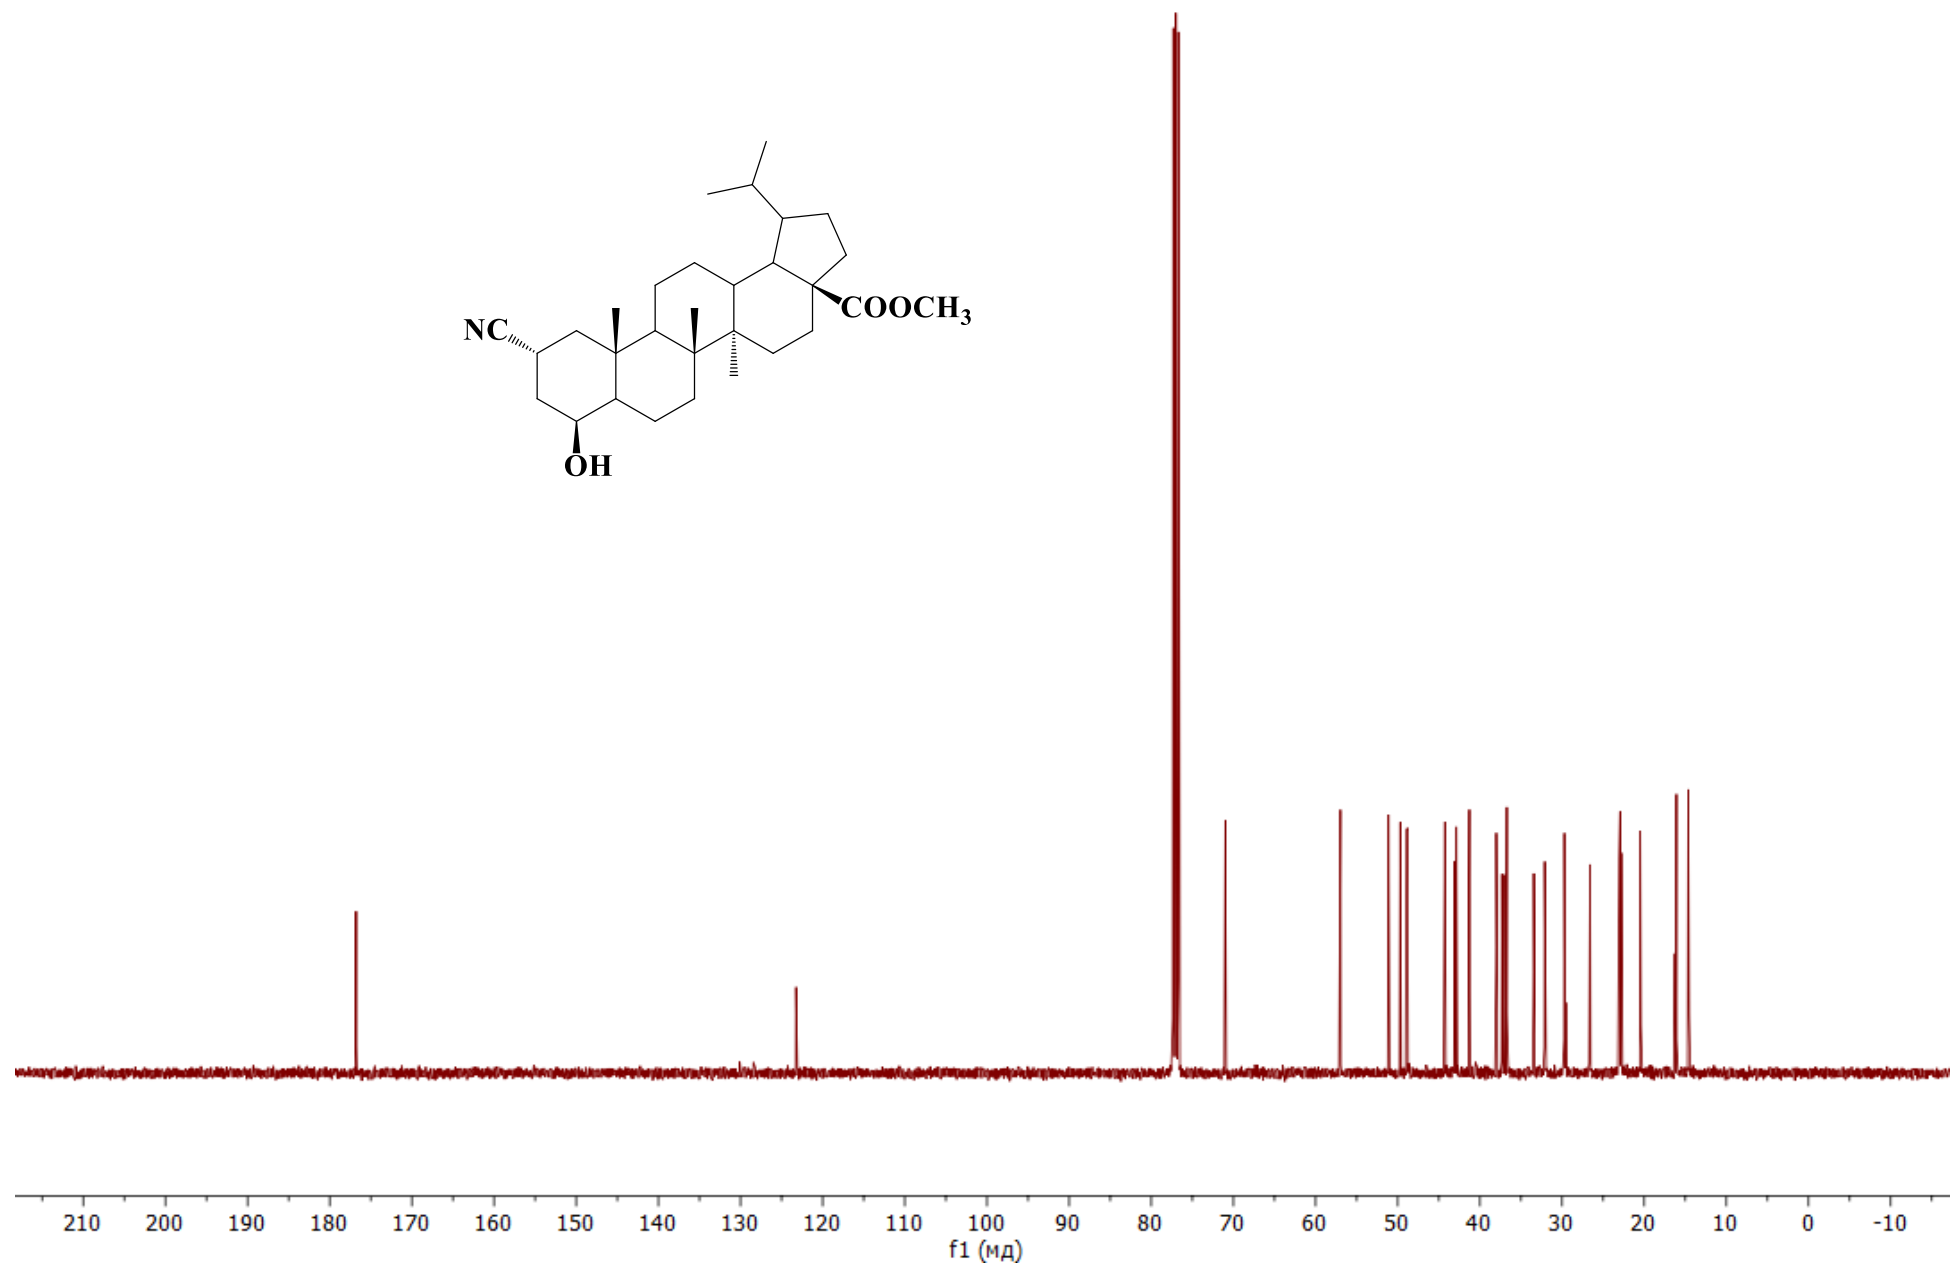

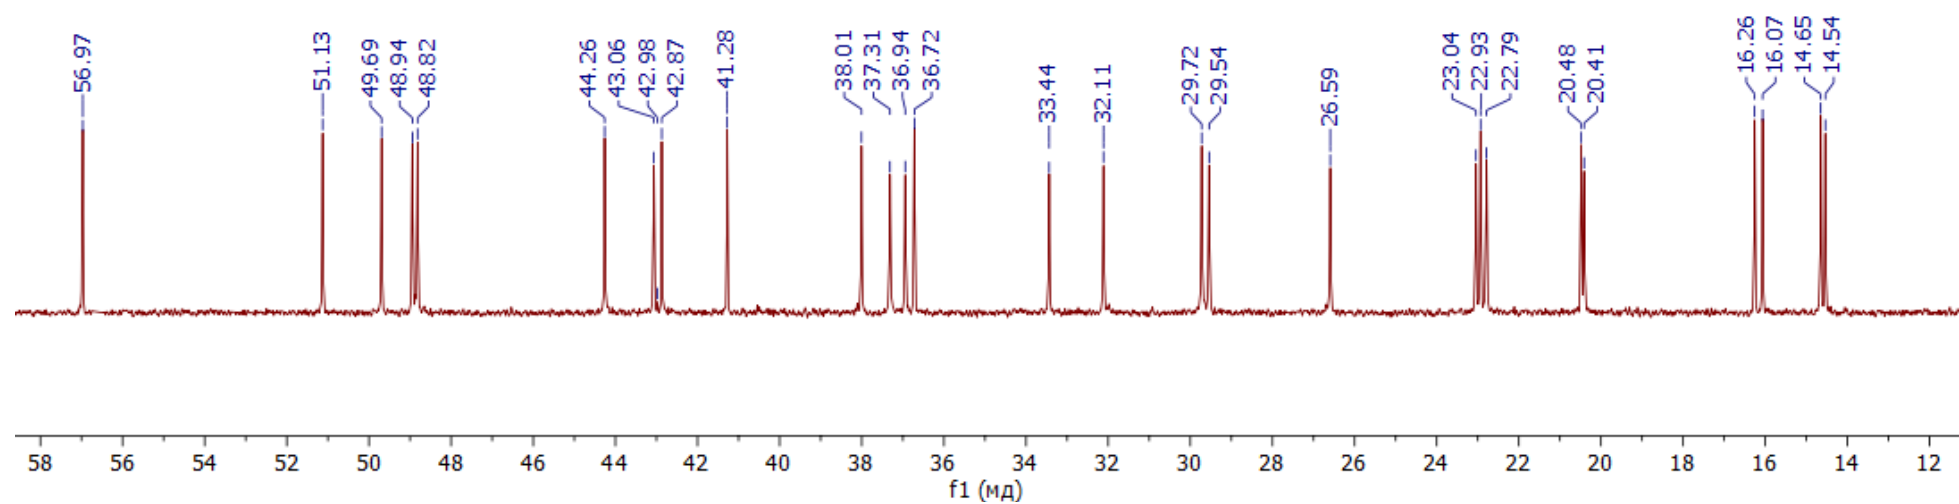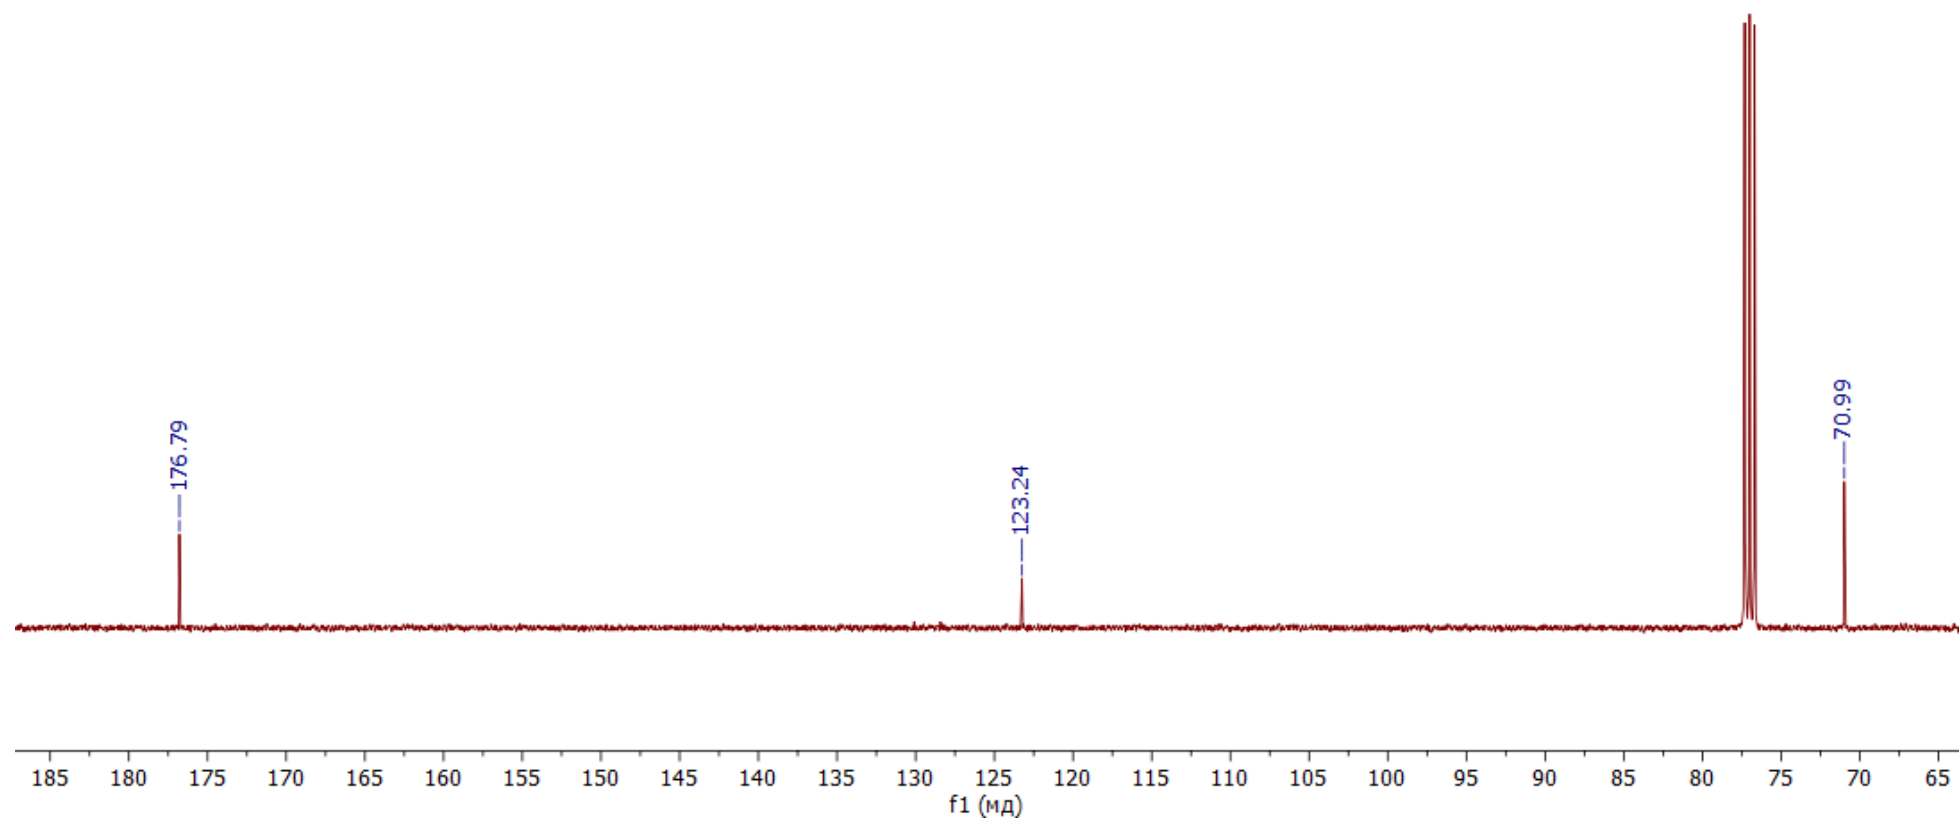

COSY NMR spectra of 2-Cyano-4-hydroxy-3,23-dinorlupan-28-oic acid methyl ester (19).

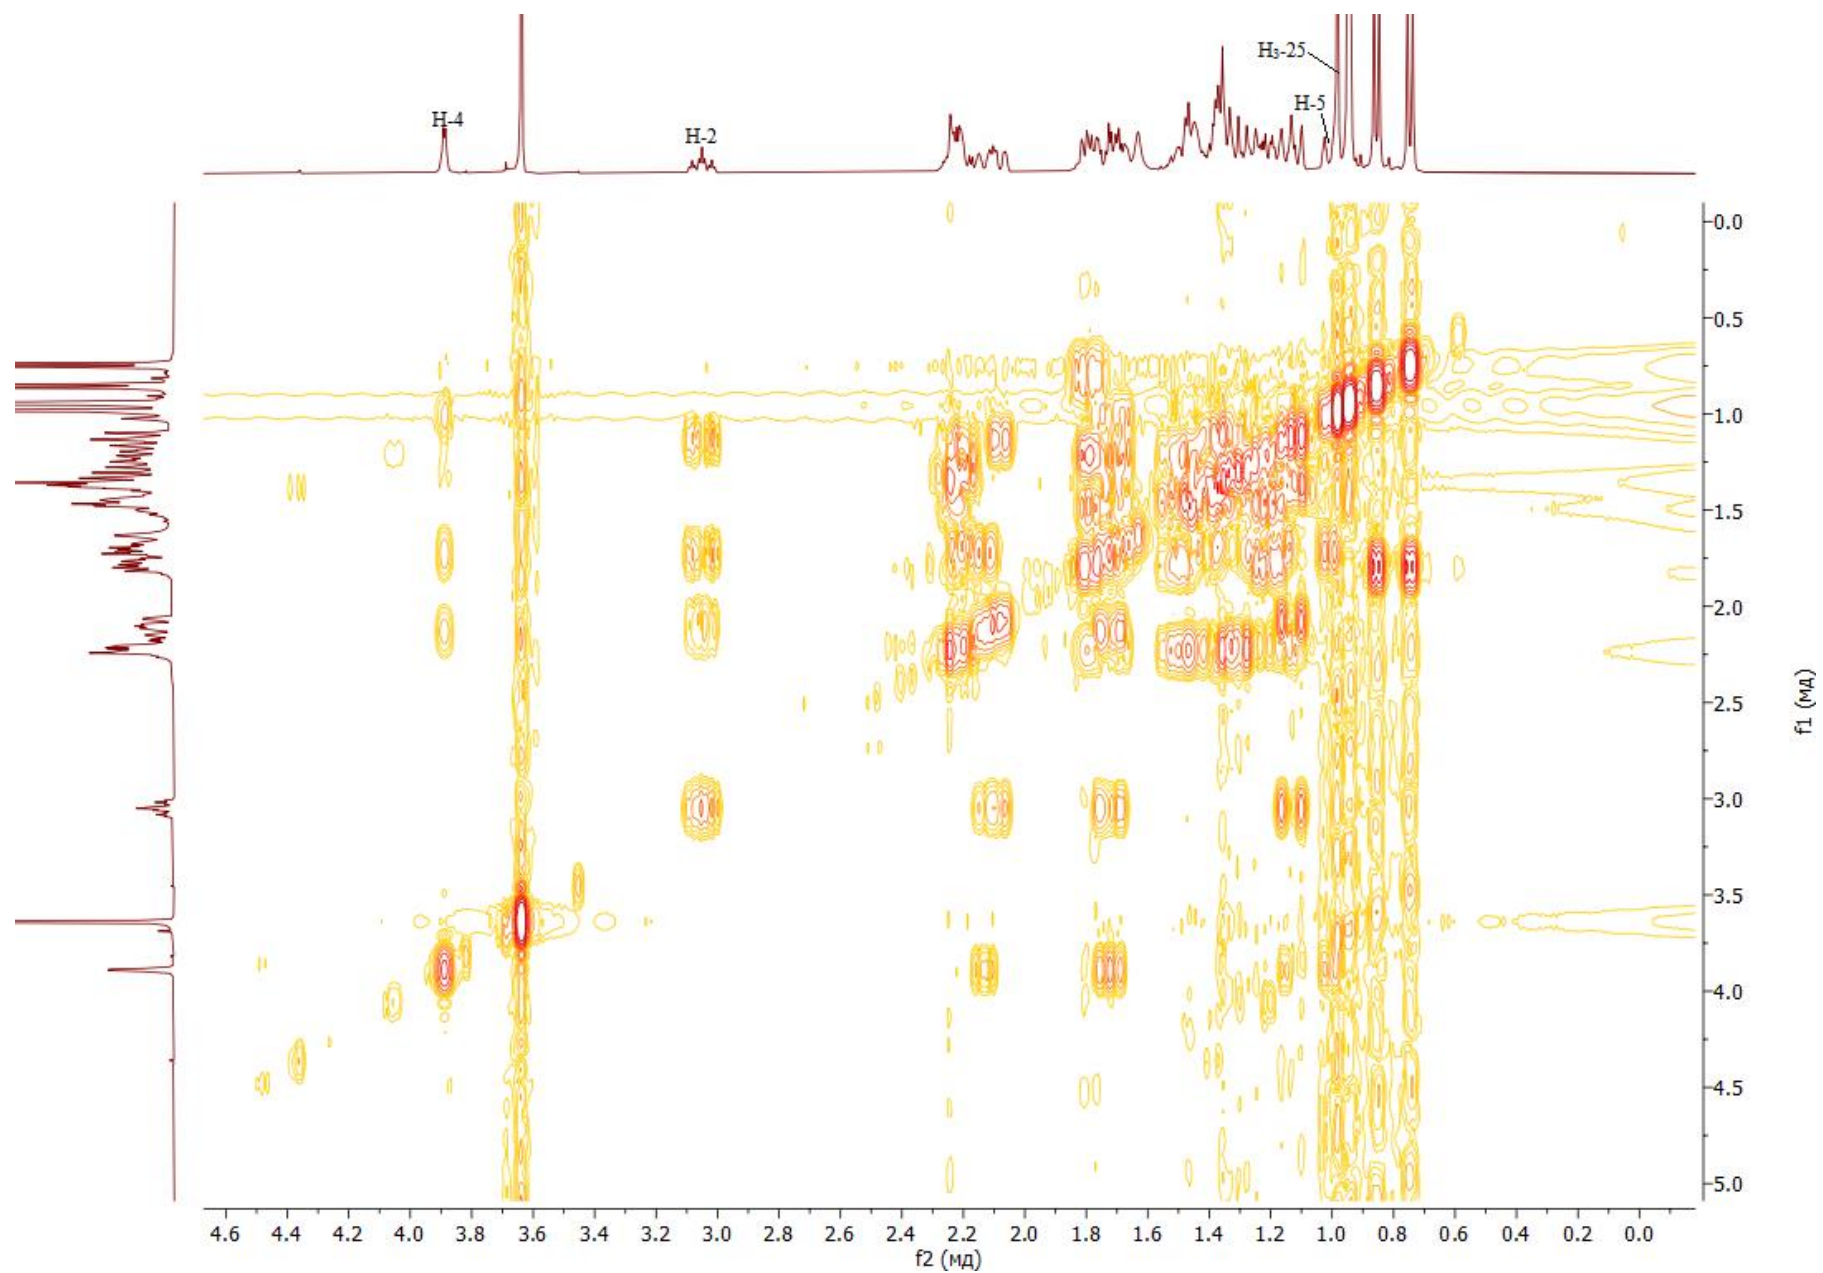



HSQC NMR spectra of 2-Cyano-4-hydroxy-3,23-dinorlupan-28-oic acid methyl ester (19).

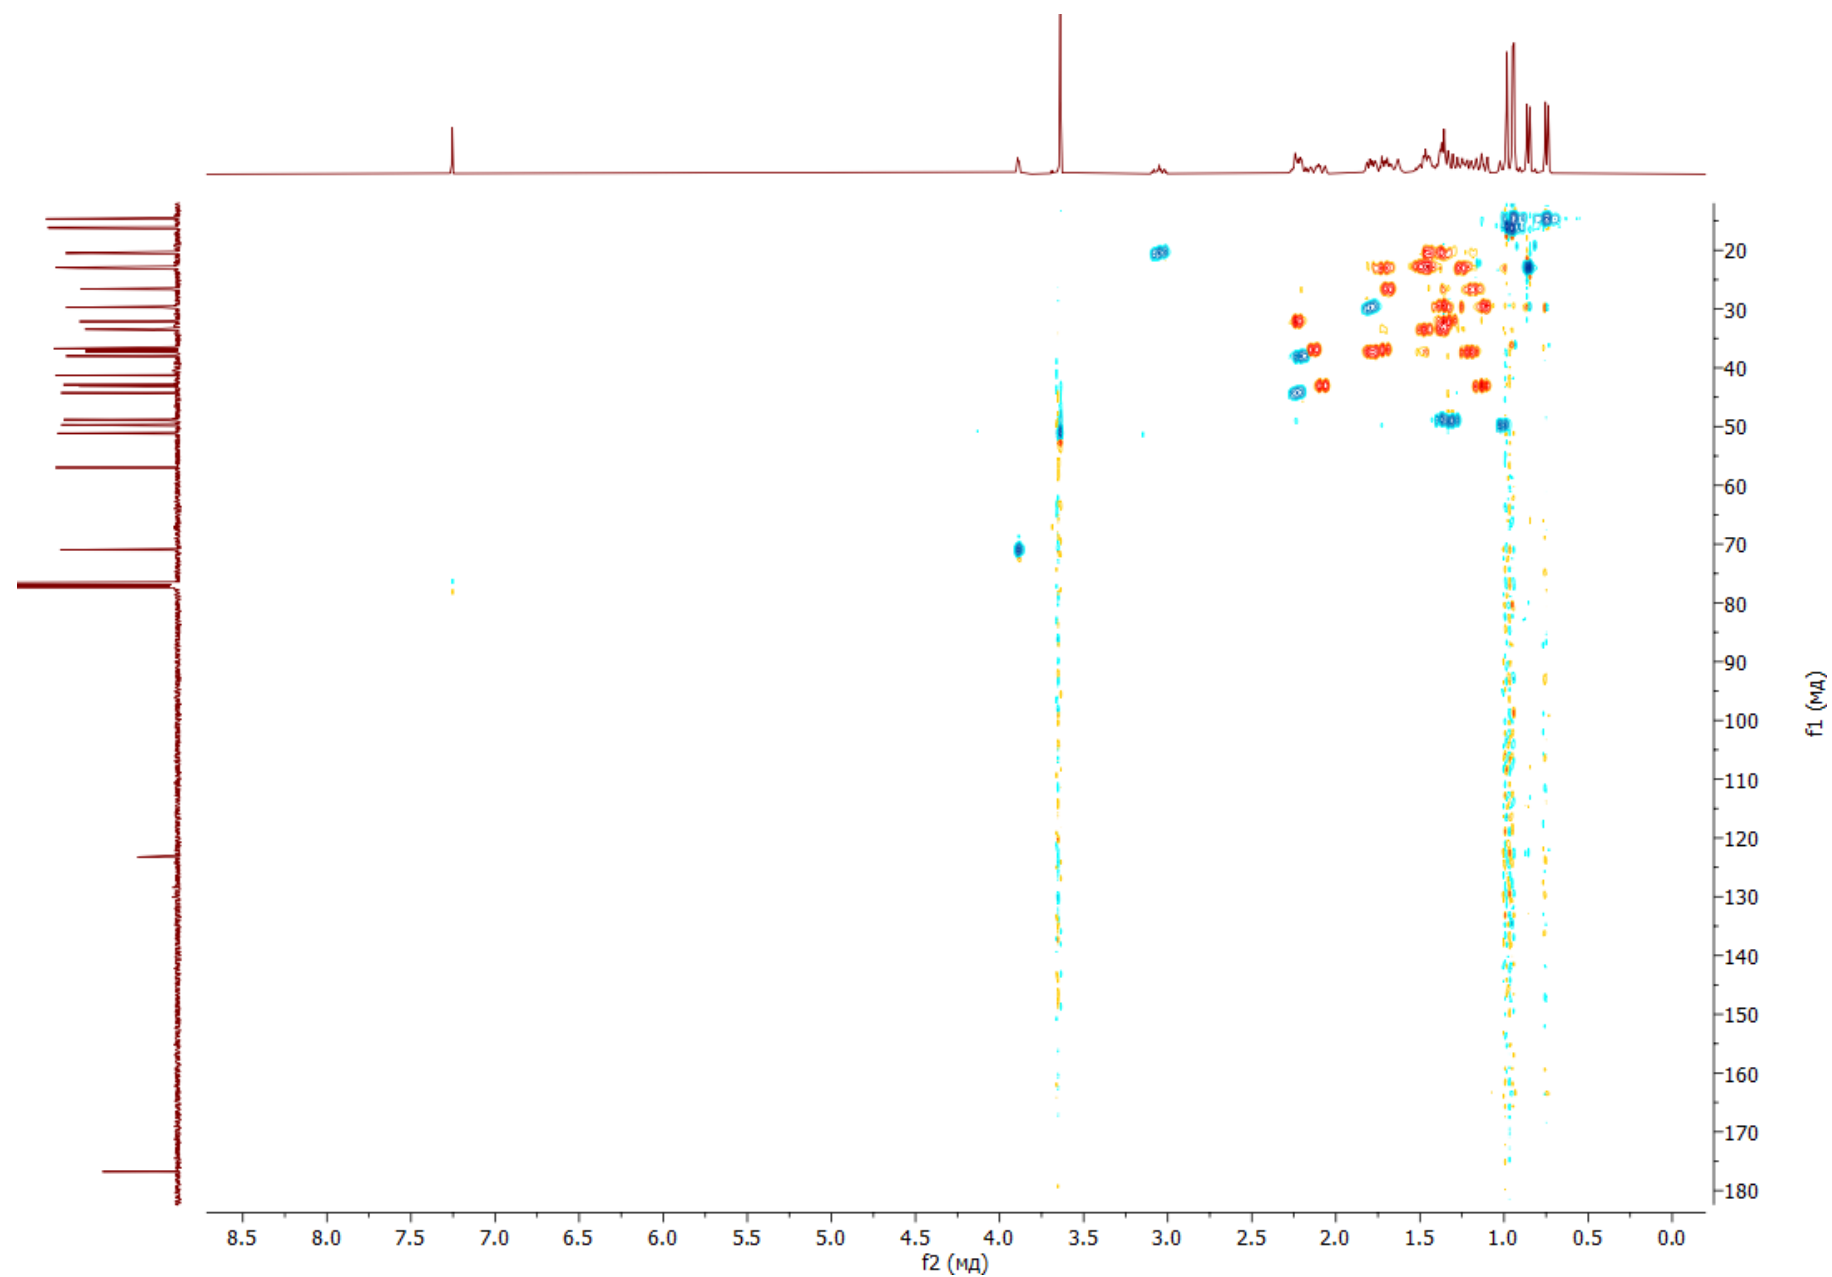

HSQC NMR spectra of 2-Cyano-4-hydroxy-3,23-dinorlupan-28-oic acid methyl ester (19).

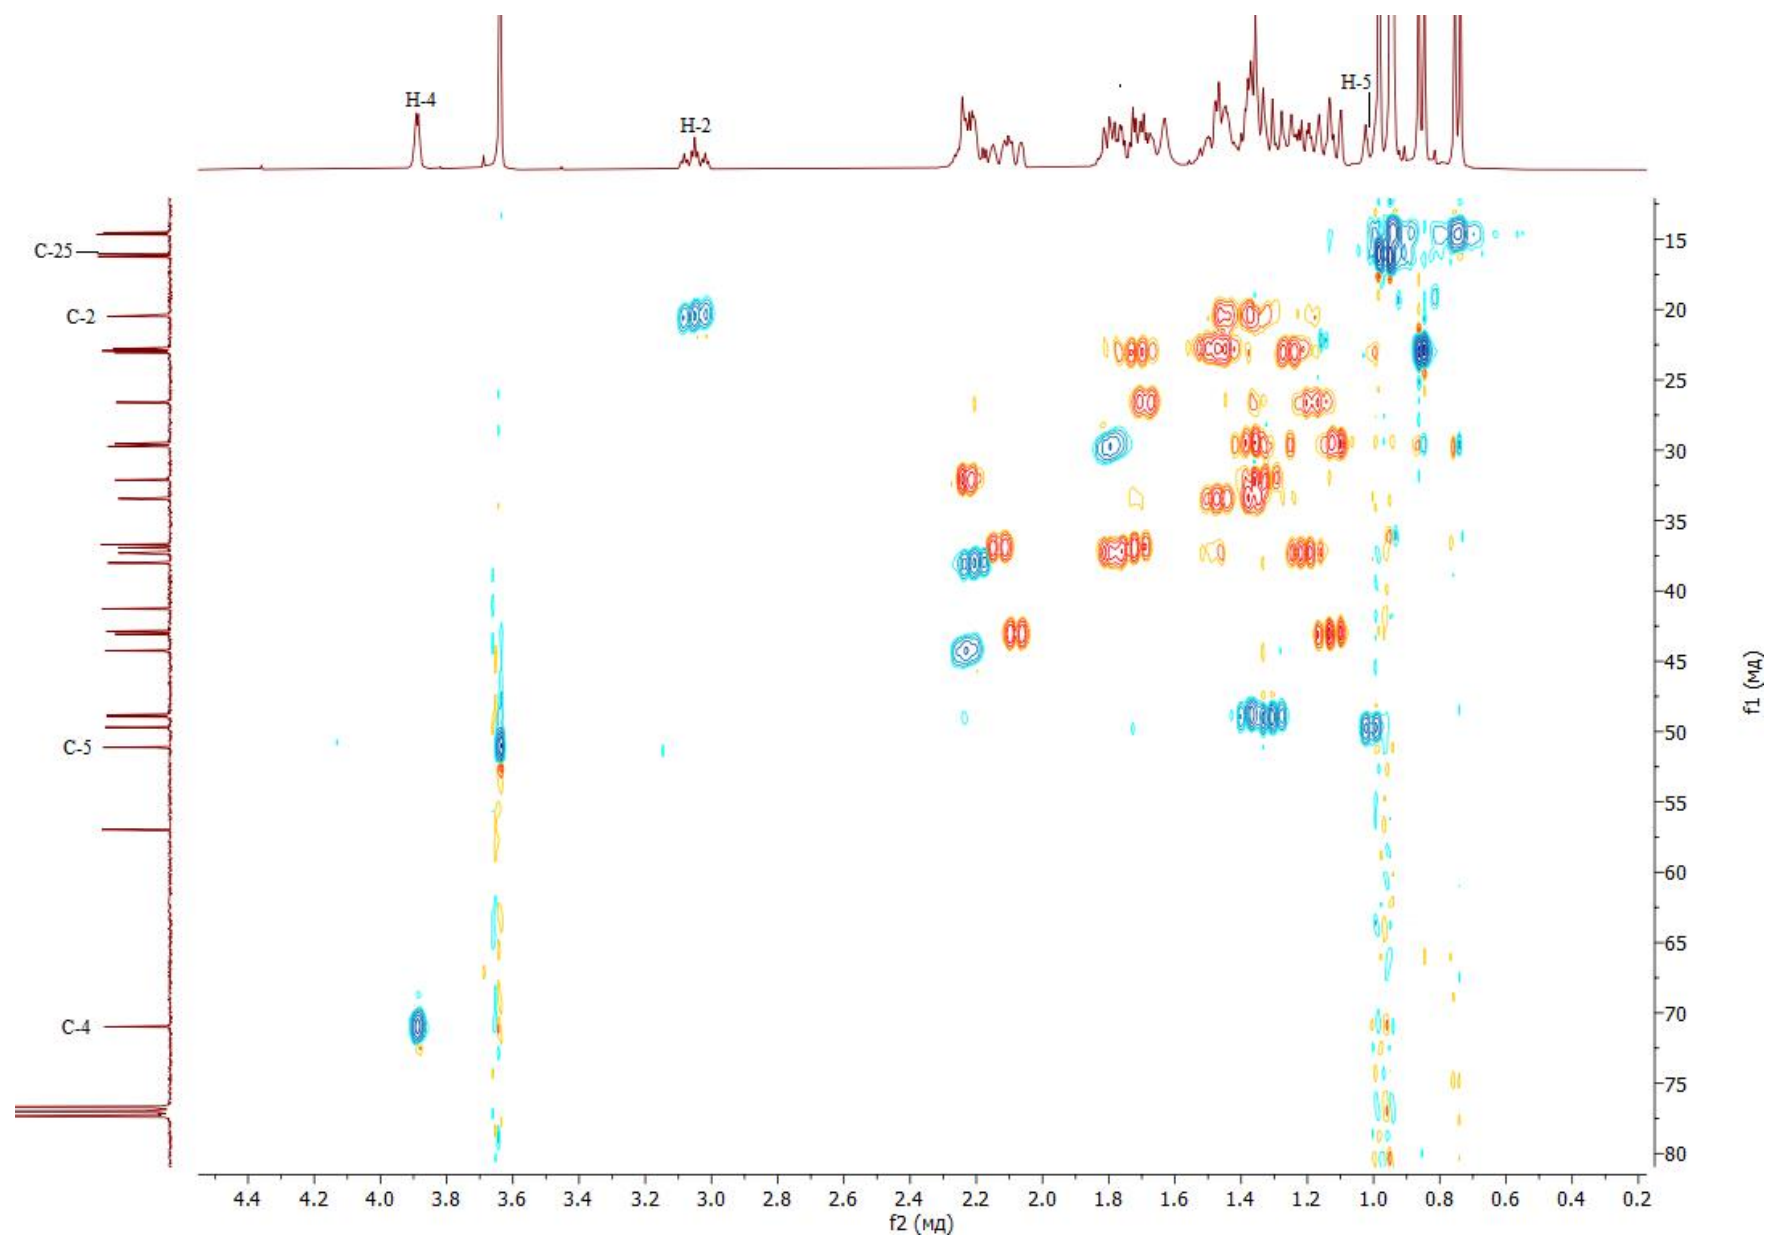

HMBC NMR spectra of 2-Cyano-4-hydroxy-3,23-dinorlupan-28-oic acid methyl ester (19).

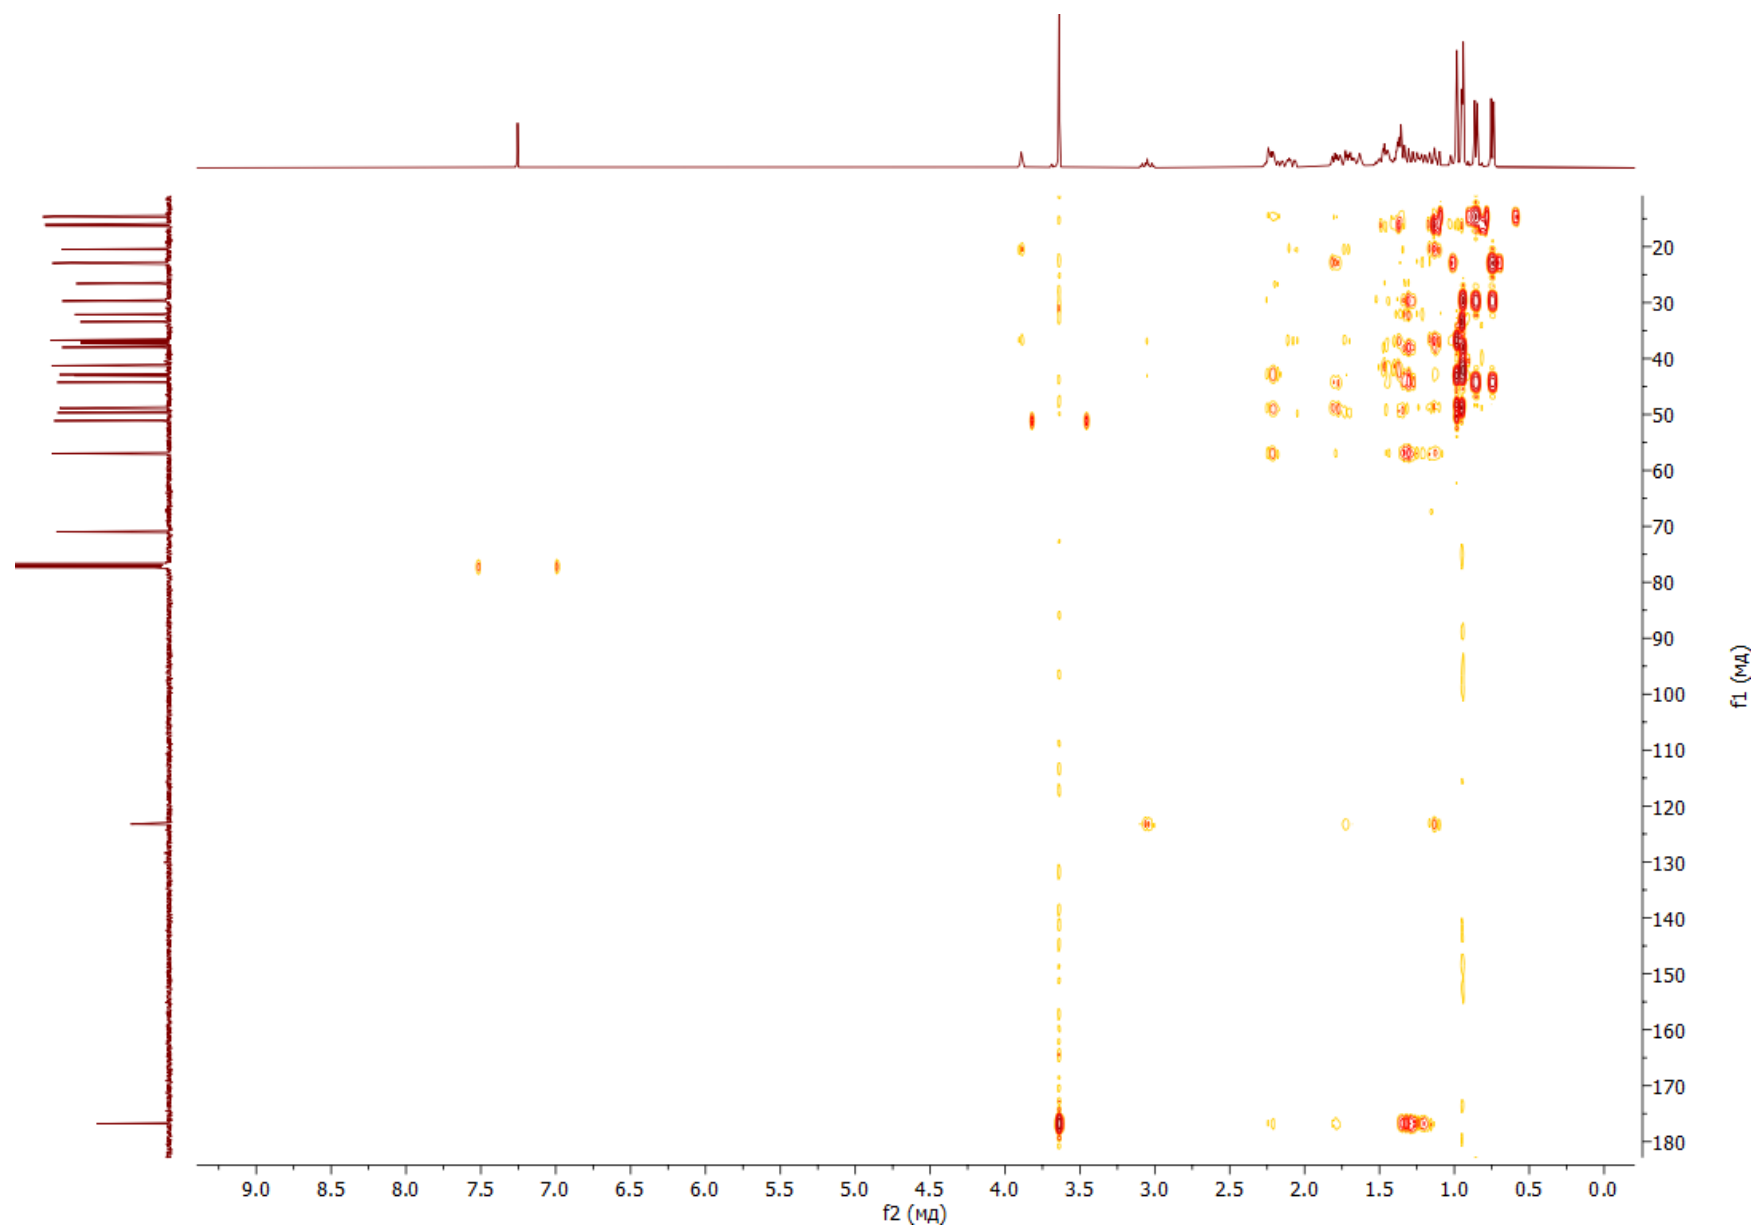

NOESY NMR spectra of 2-Cyano-4-hydroxy-3,23-dinorlupan-28-oic acid methyl ester (19).

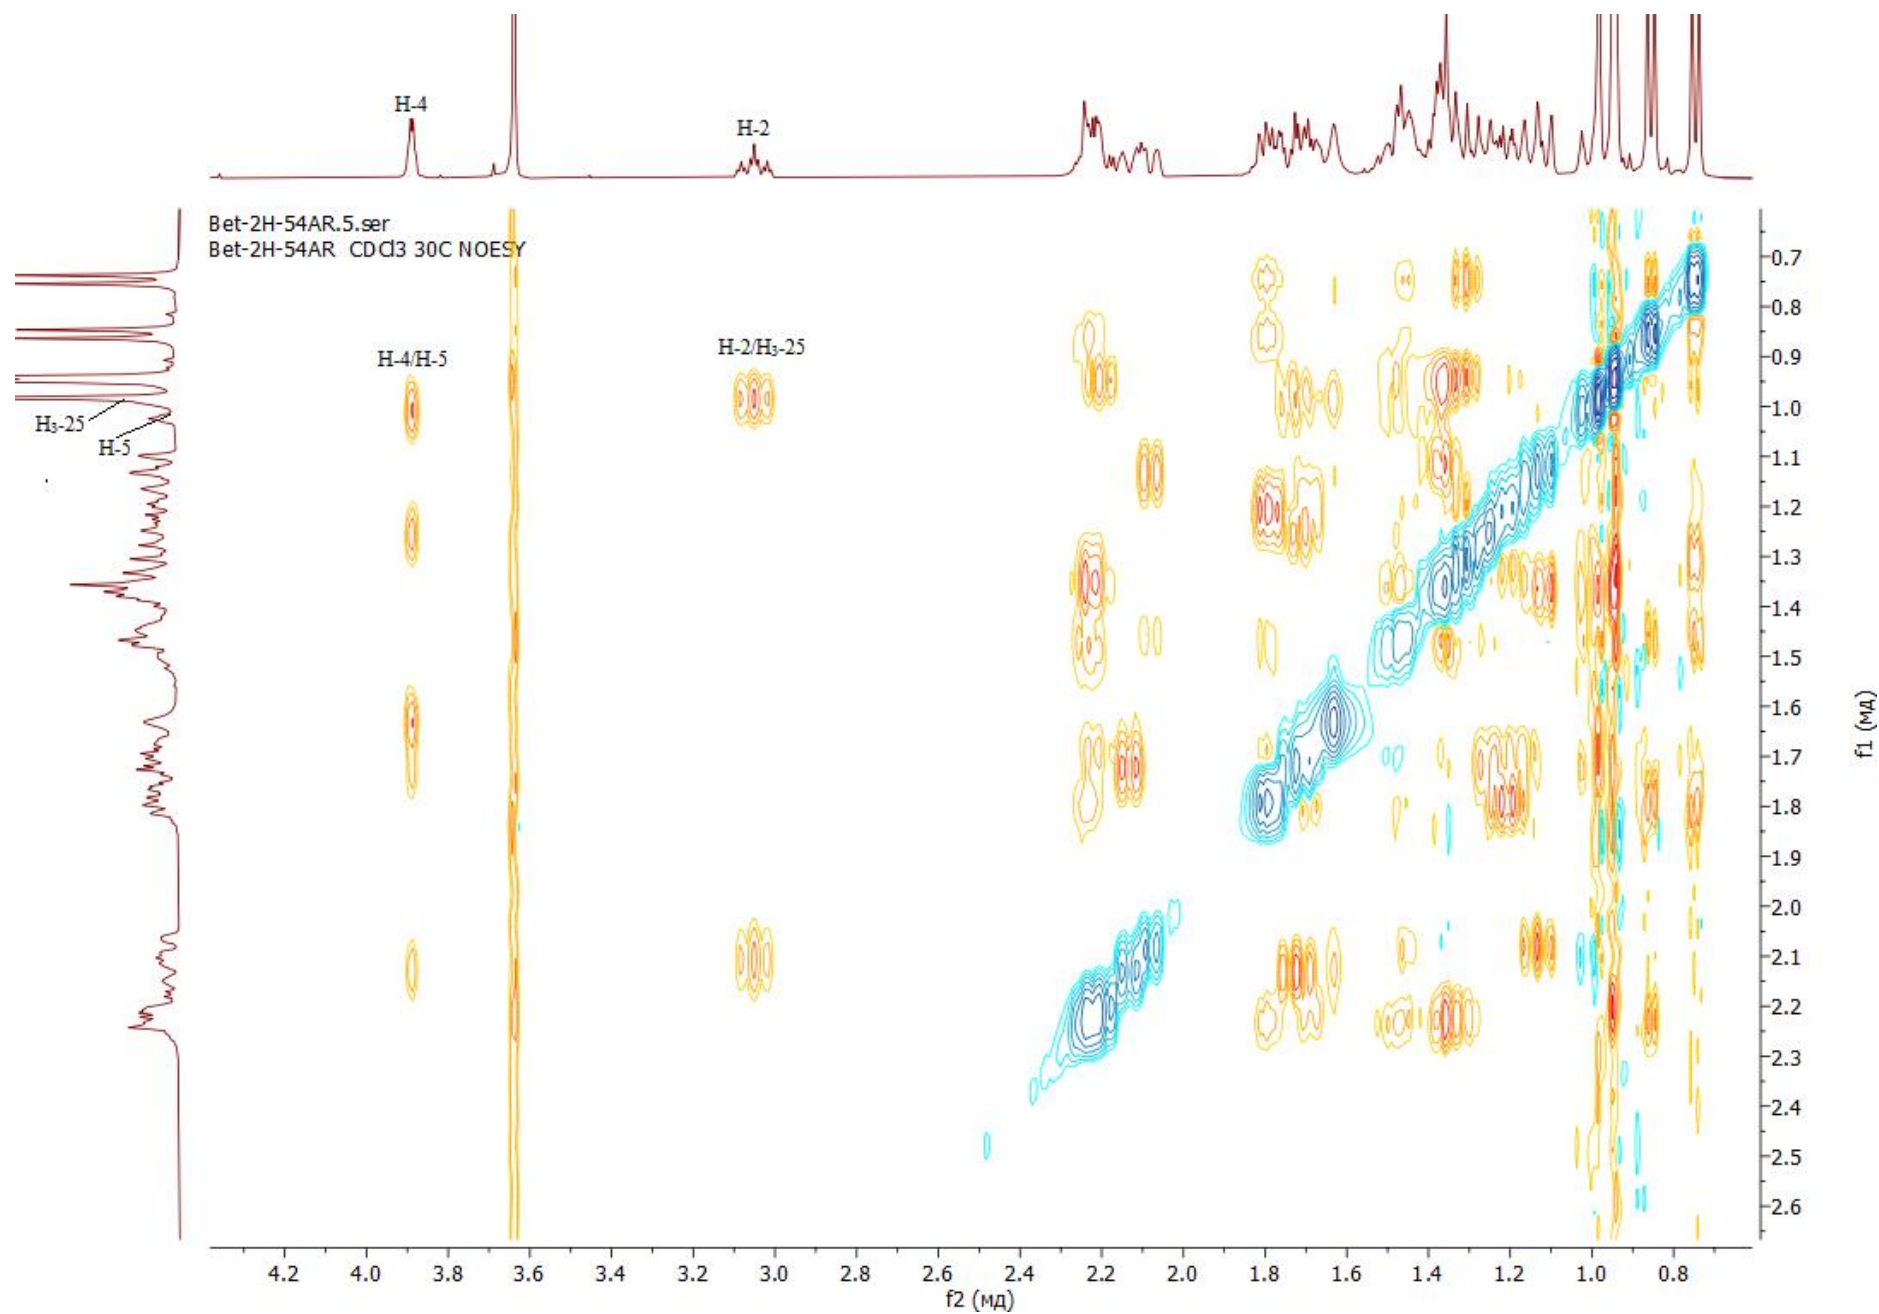

<sup>1</sup>H NMR spectra of 28-Benzoyloxy-2-cyano-4-oxo-3,4-seco-3,23-dinorlupan (20)

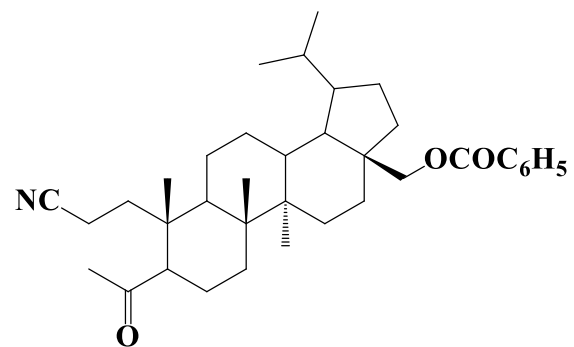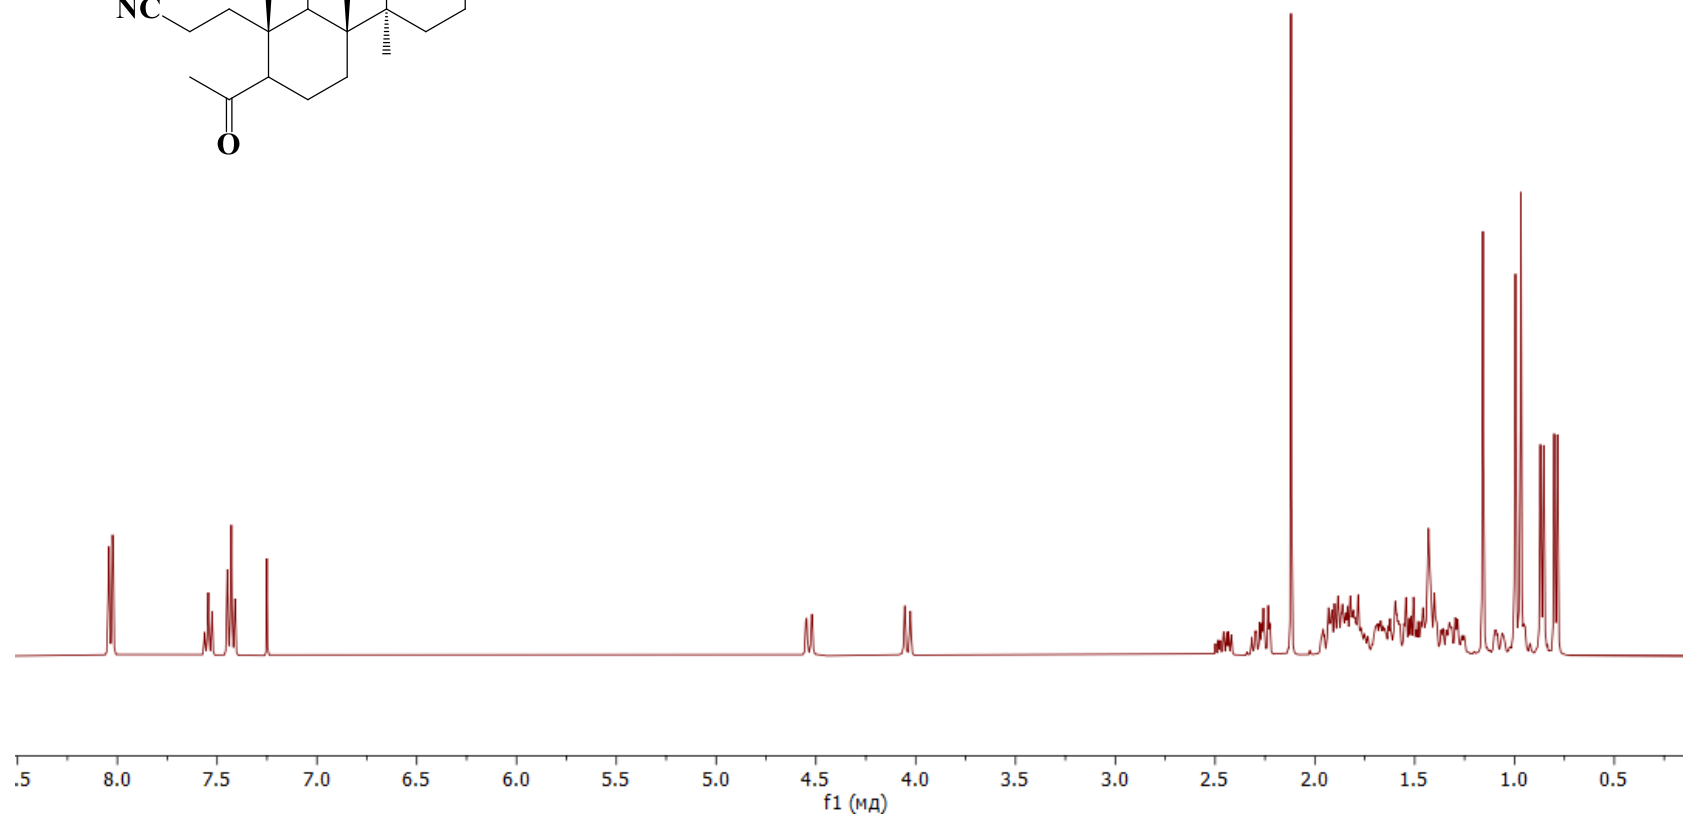

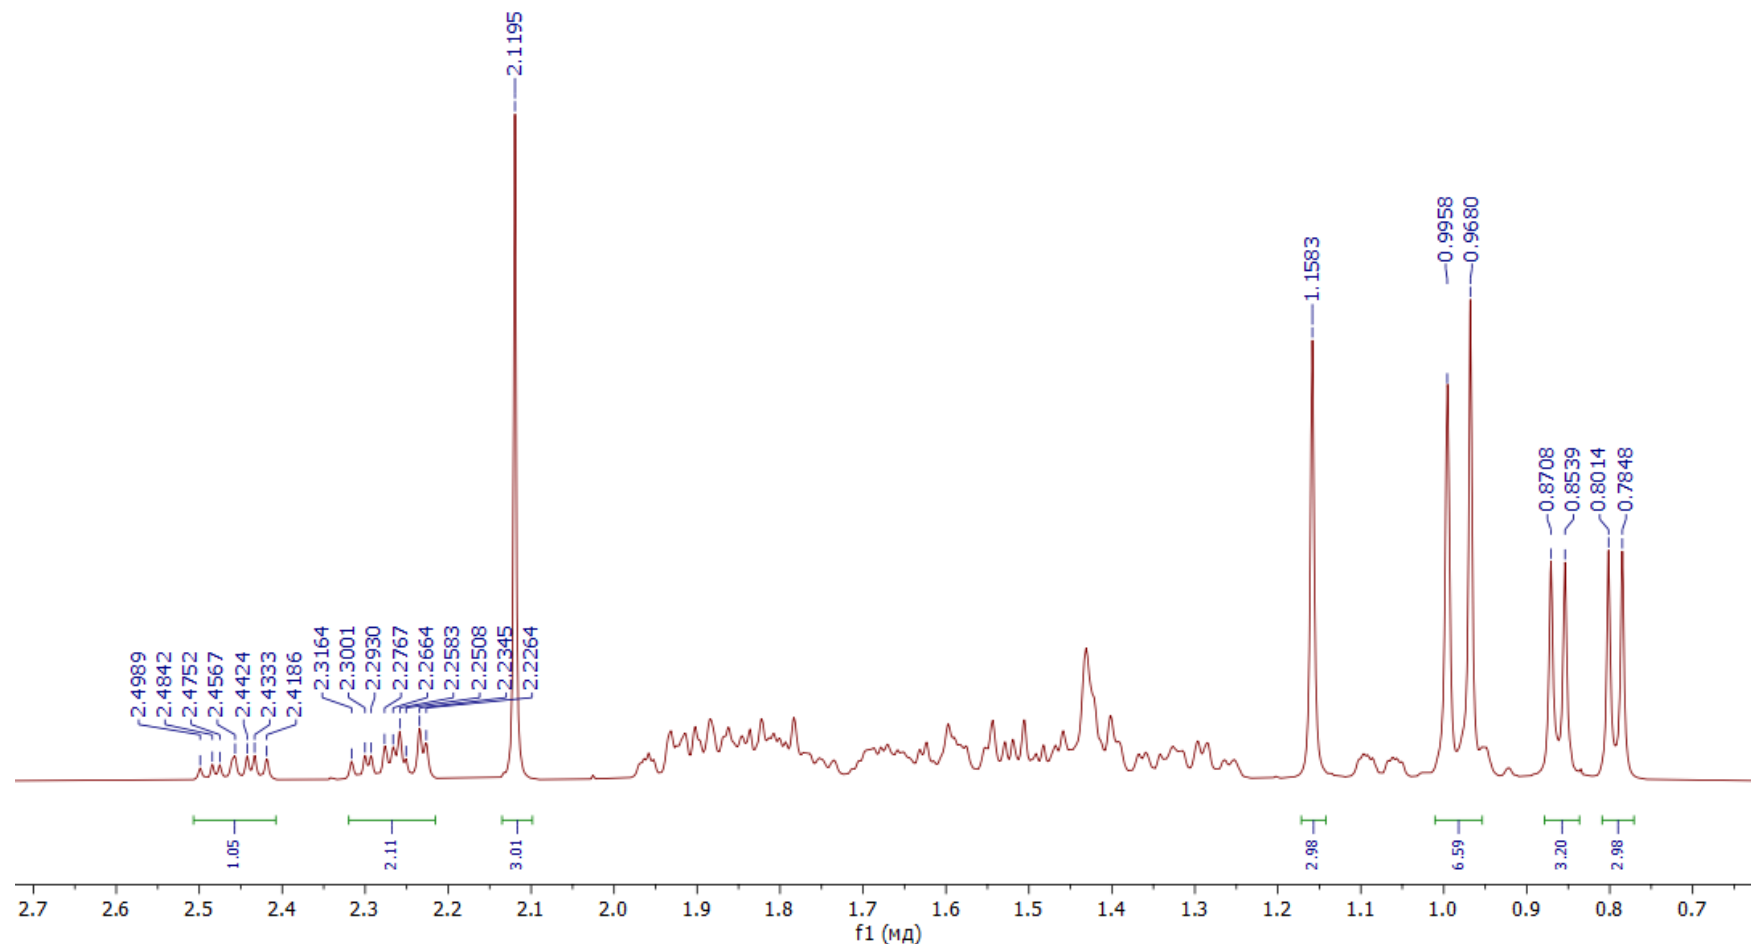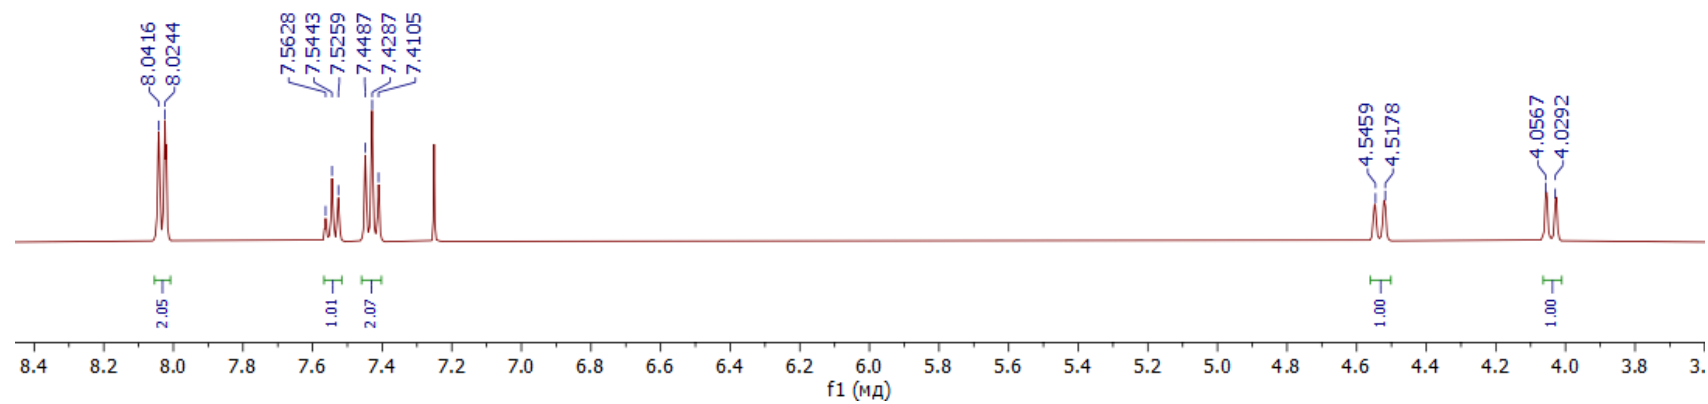

<sup>13</sup>C NMR spectra of 28-Benzoyloxy-2-cyano-4-oxo-3,4-seco-3,23-dinorlupan (20)

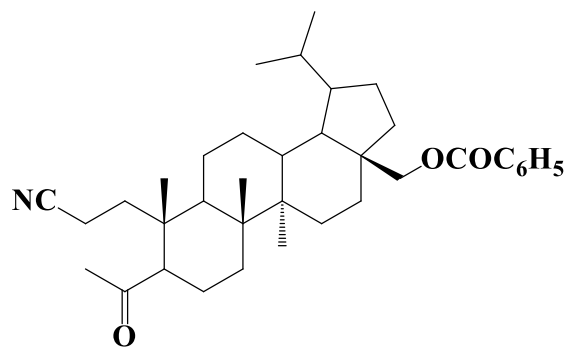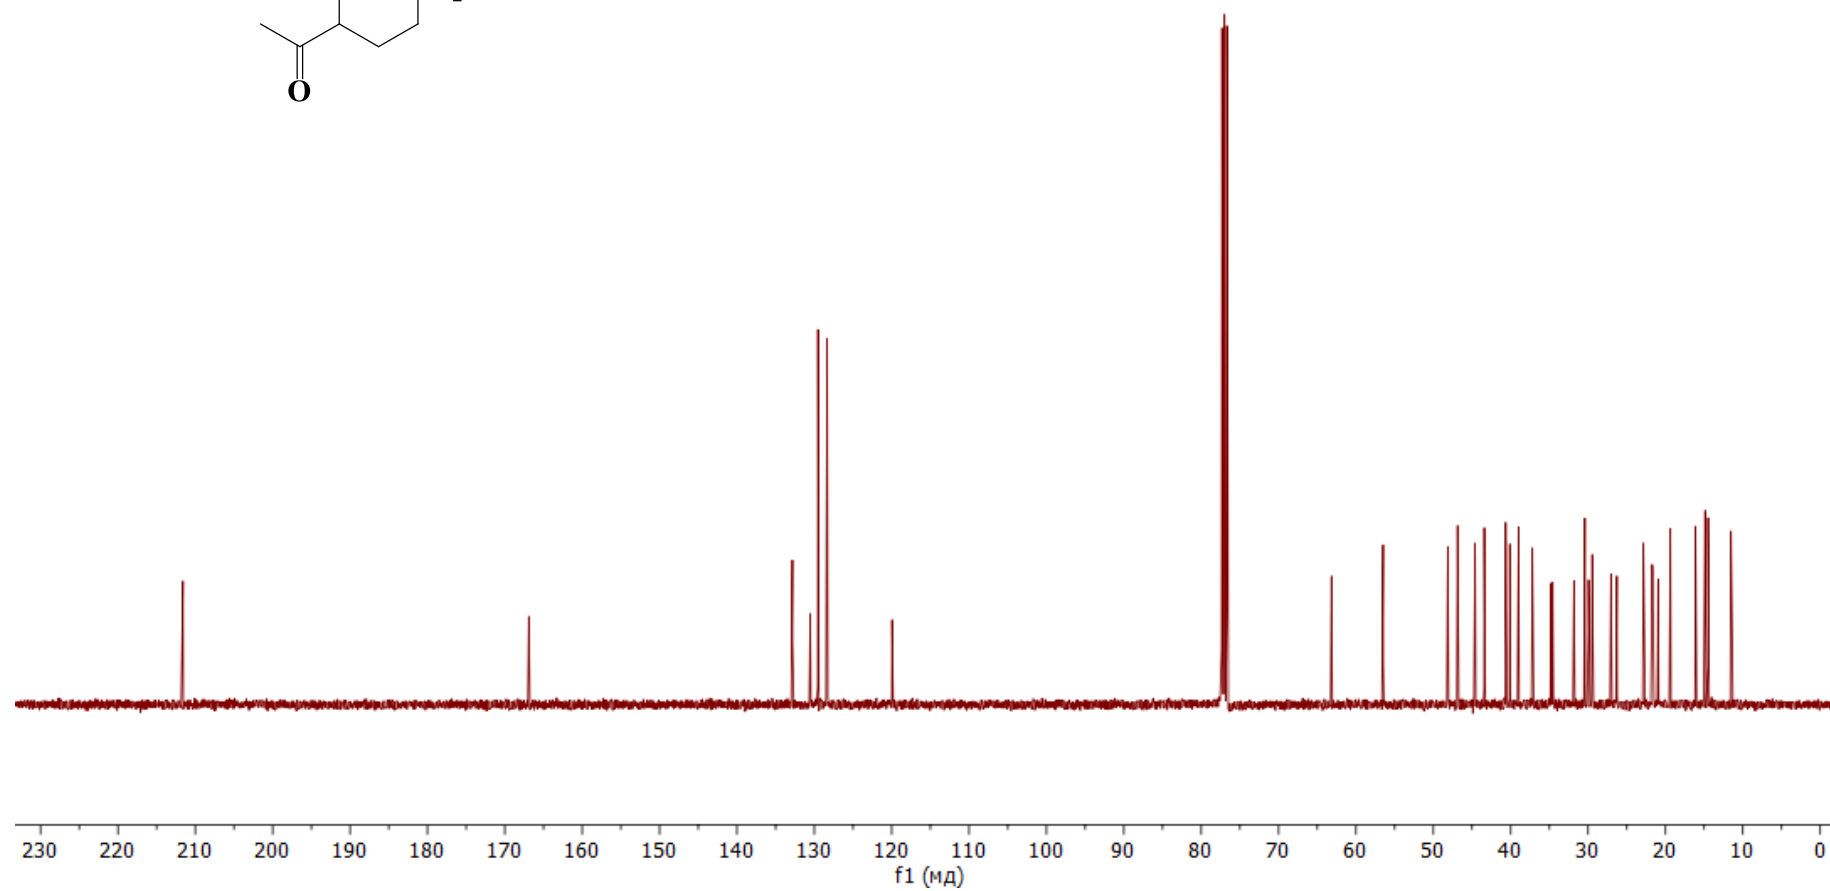

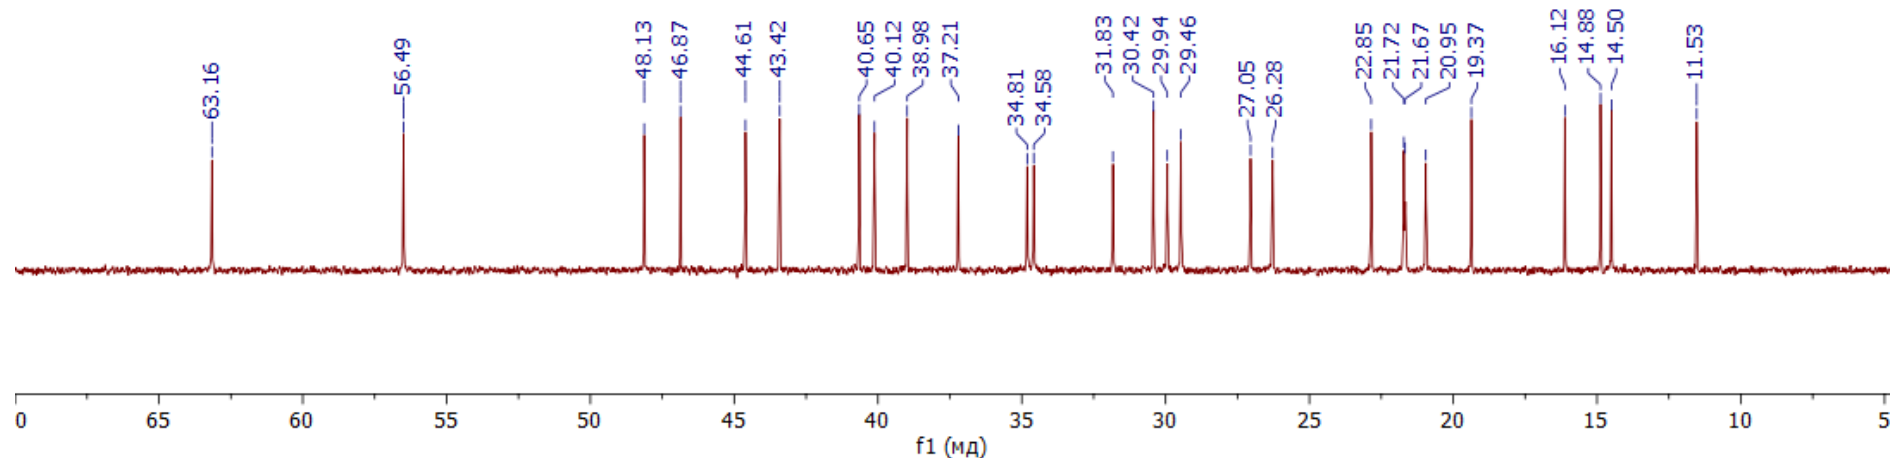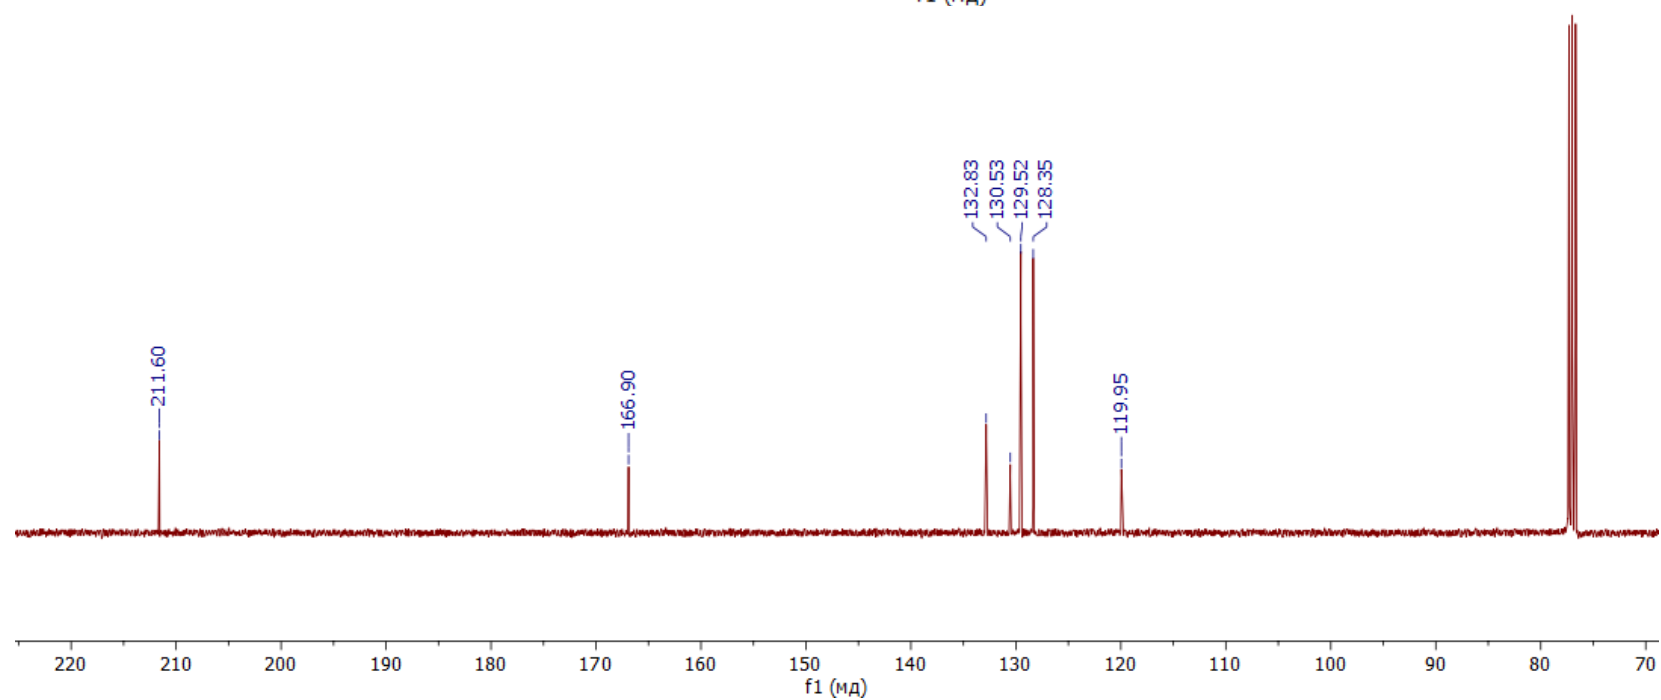



<sup>1</sup>H NMR spectra of 2-Cyano-4-oxo-3,4-seco-3,23-dinorlupan-28-oic acid methyl ester (21)

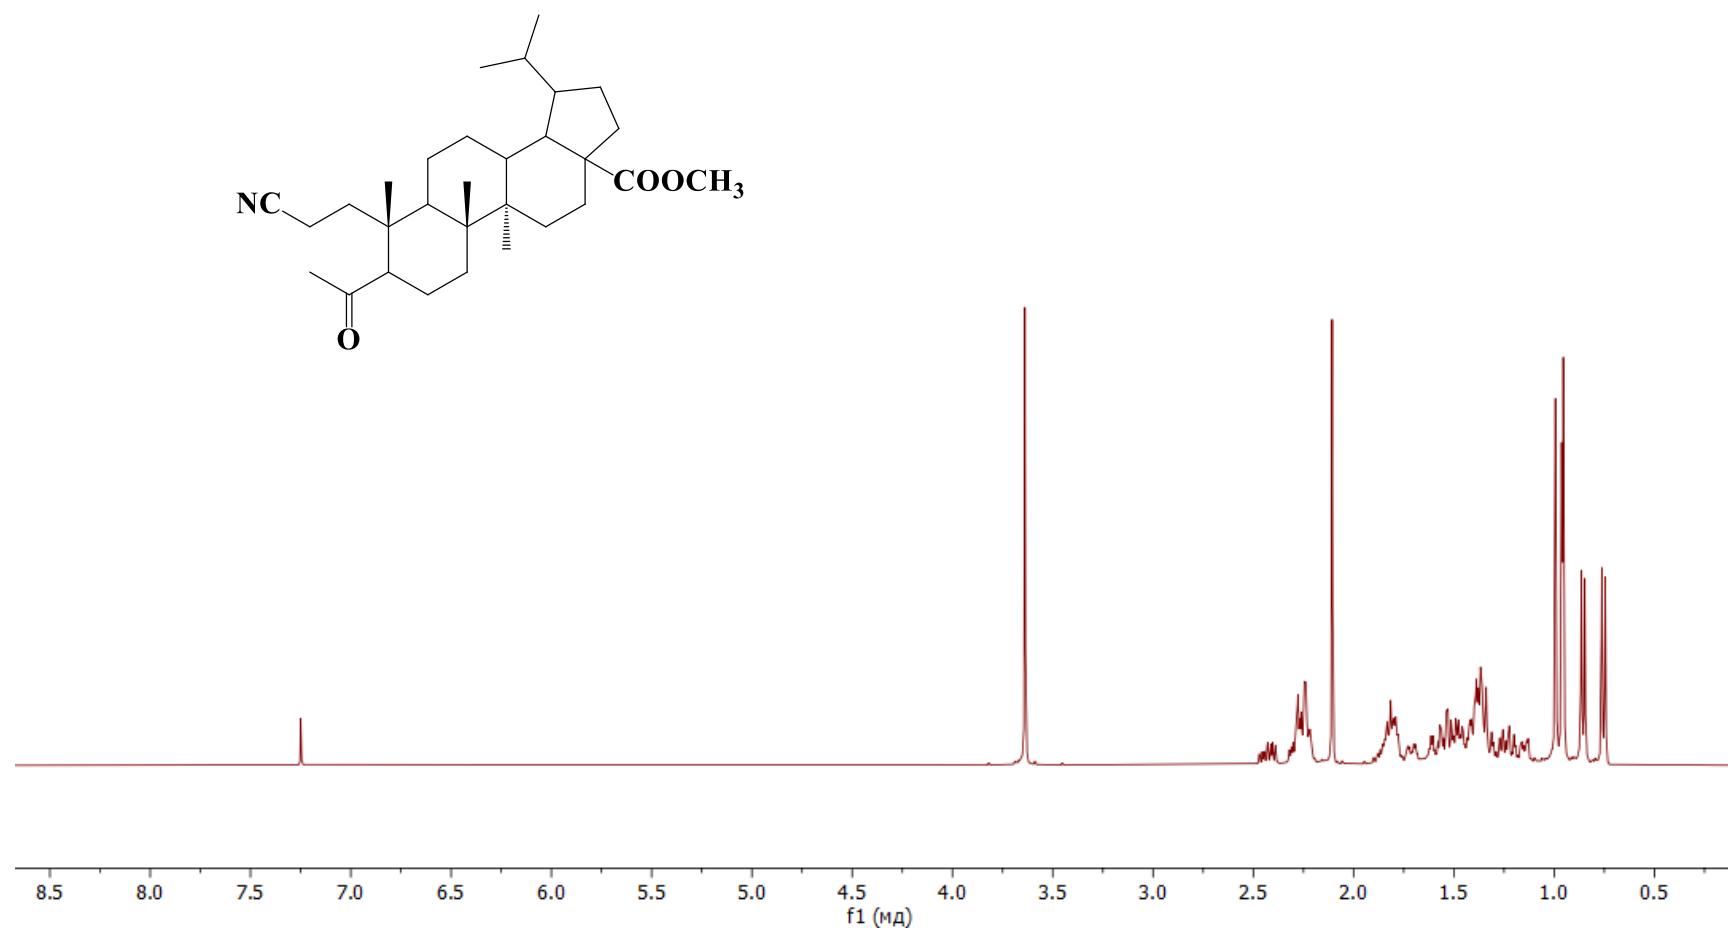

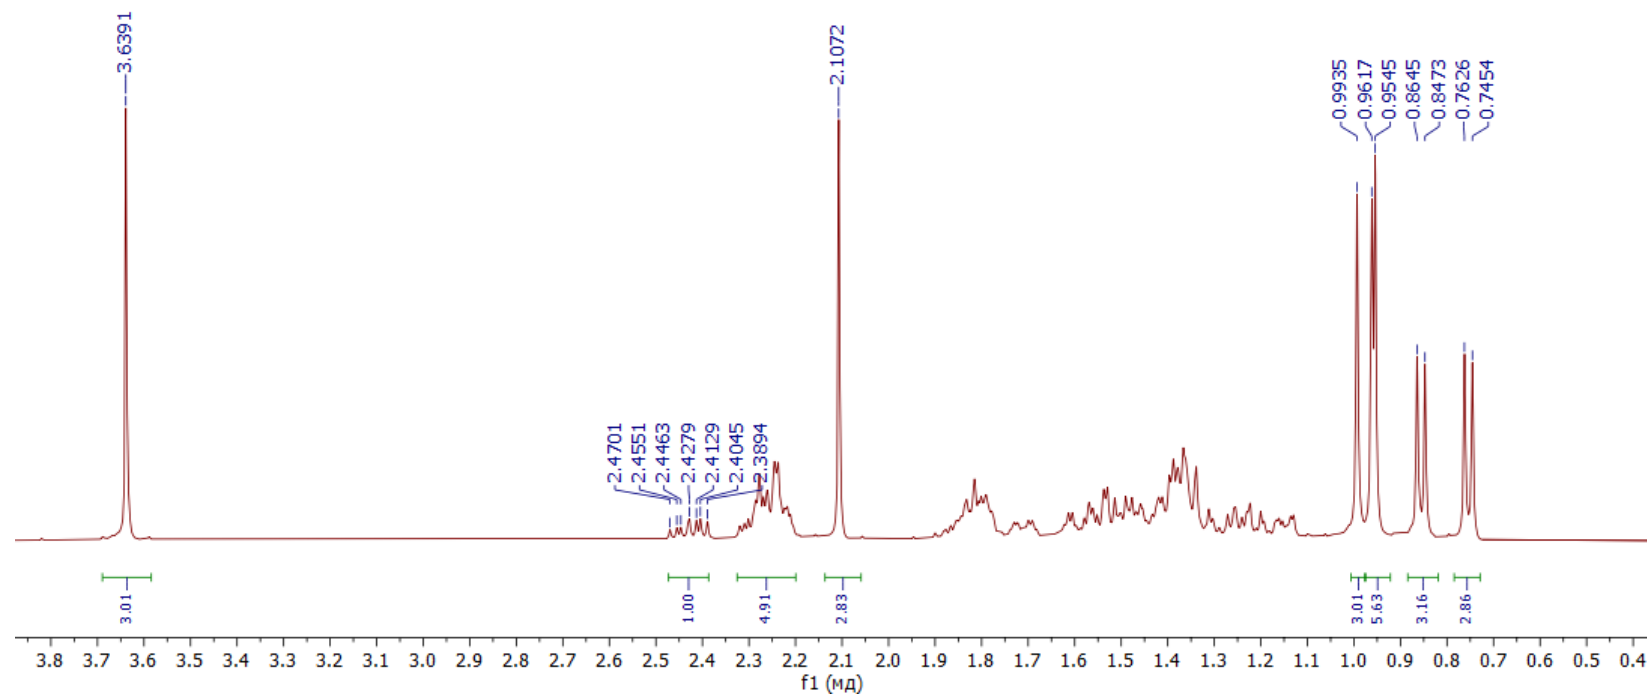

<sup>13</sup>C NMR spectra of 2-Cyano-4-oxo-3,4-seco-3,23-dinorlupan-28-oic acid methyl ester (21)

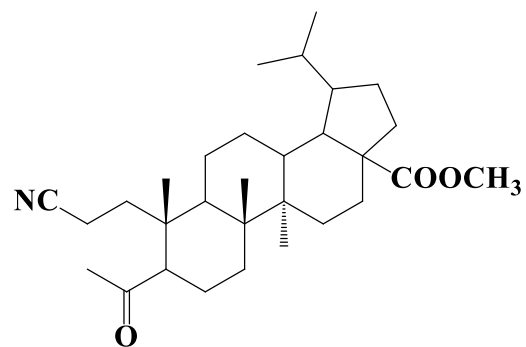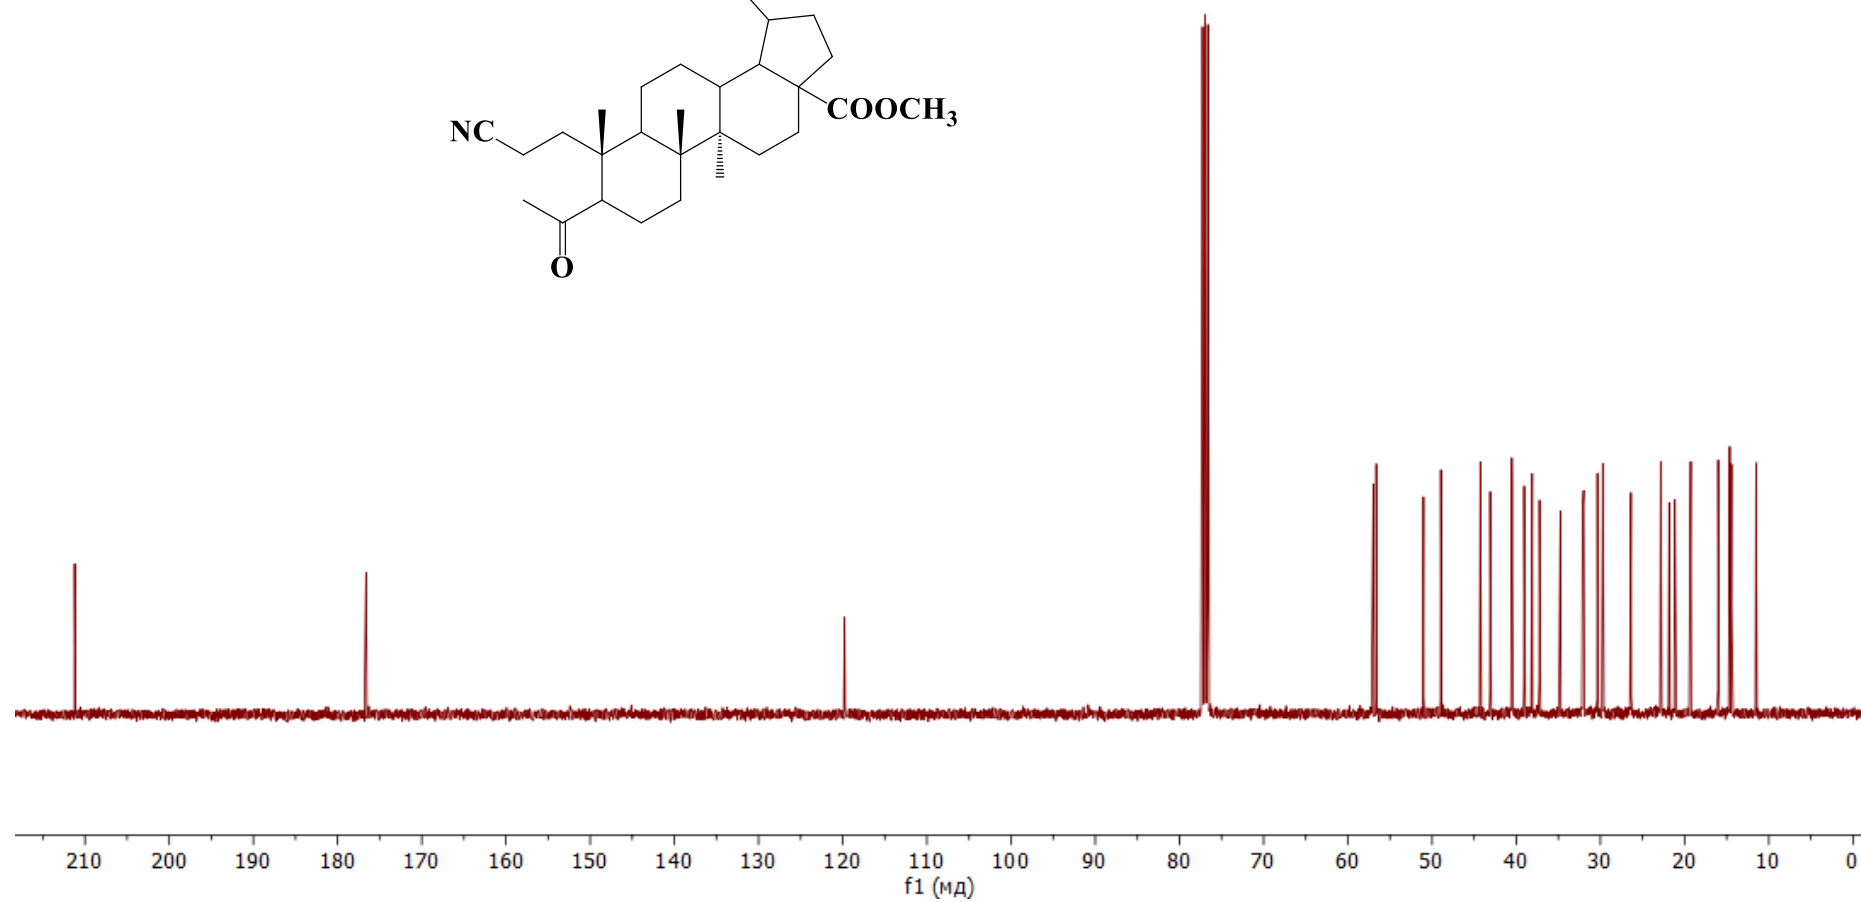

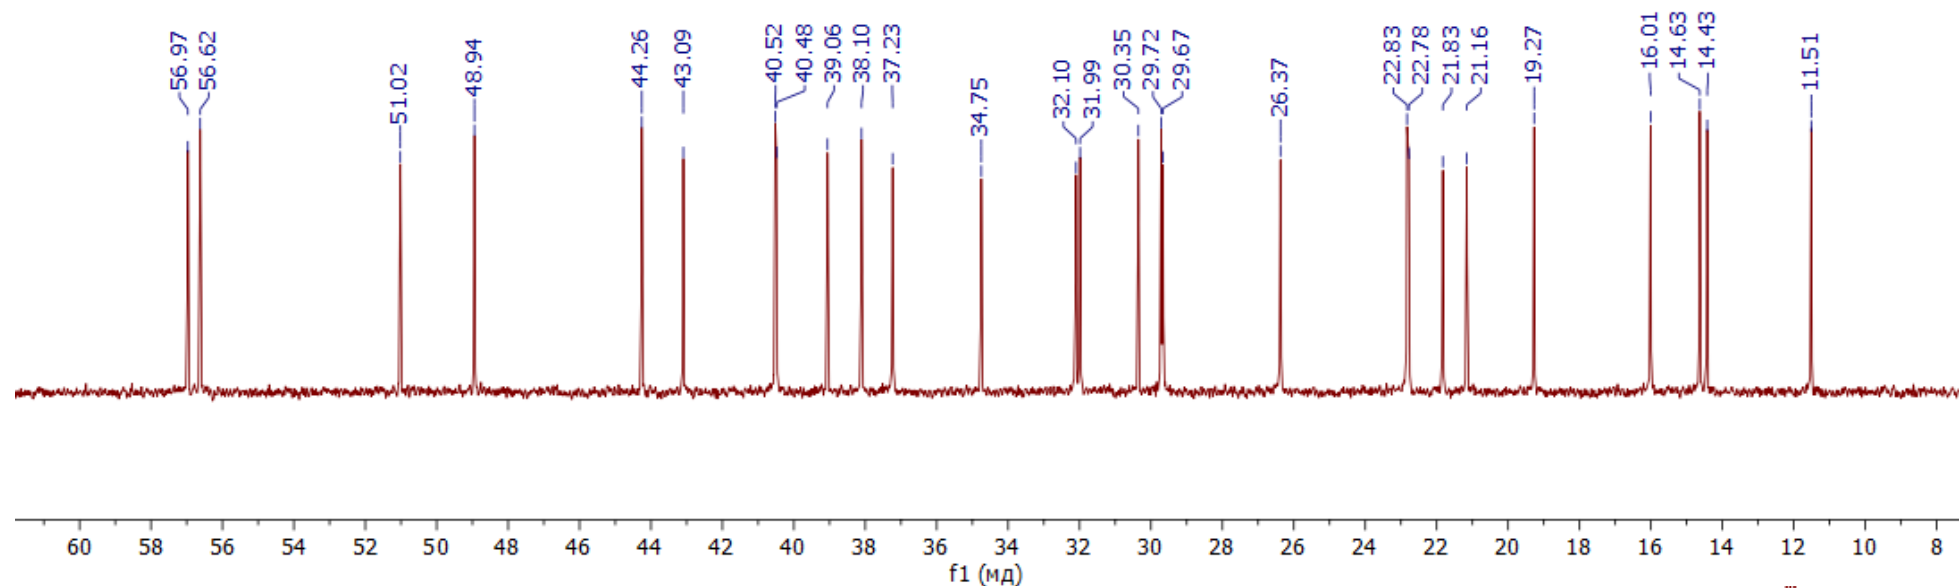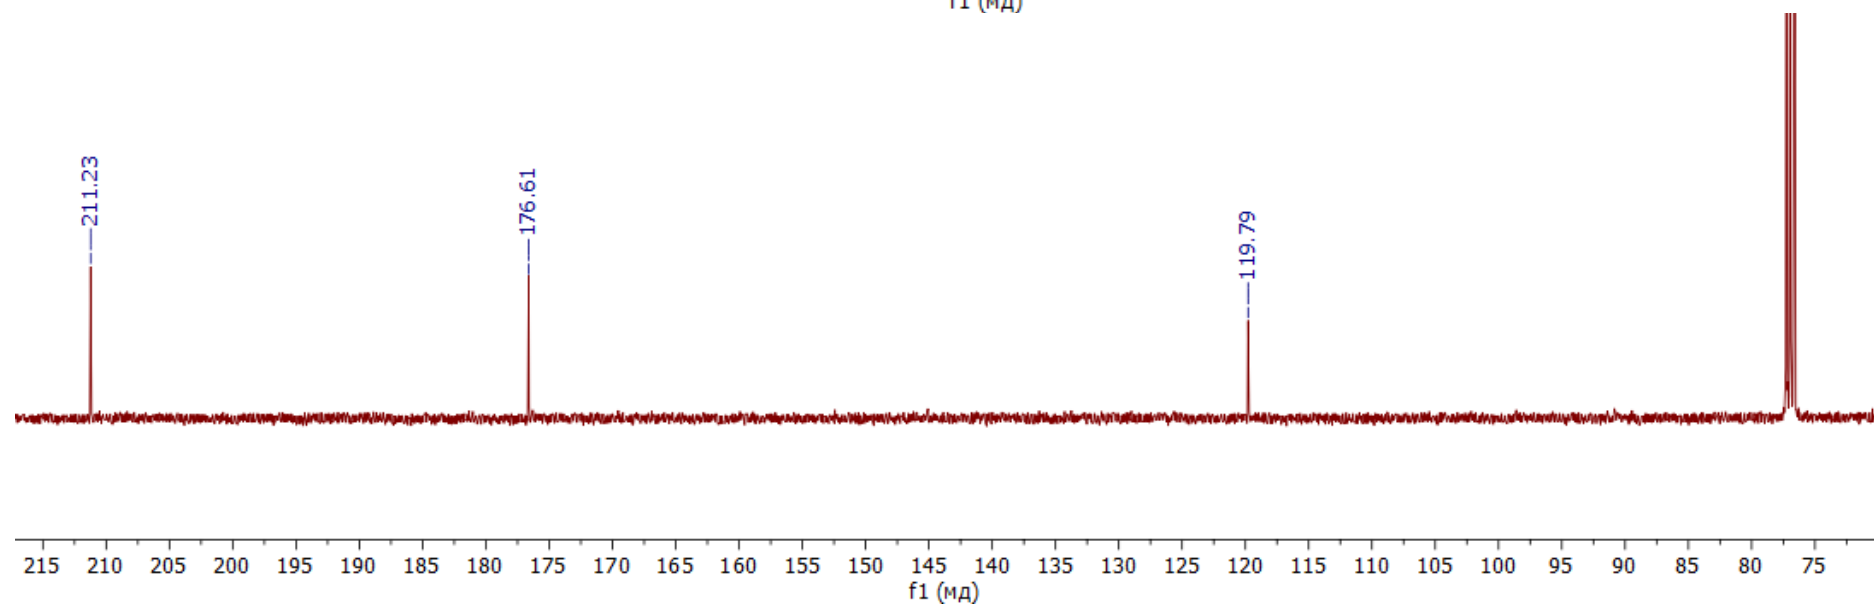

<sup>1</sup>H NMR spectra of 2-Cyano-28-hydroxy-3,4-seco-3,23-dinor-2,4-cyclolup-2(4)-ene (22).

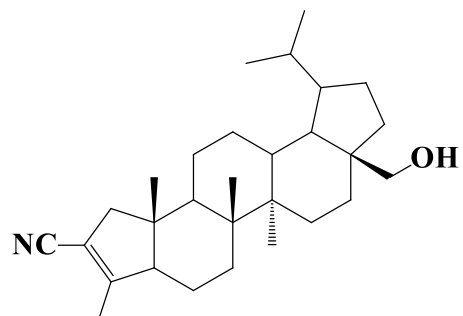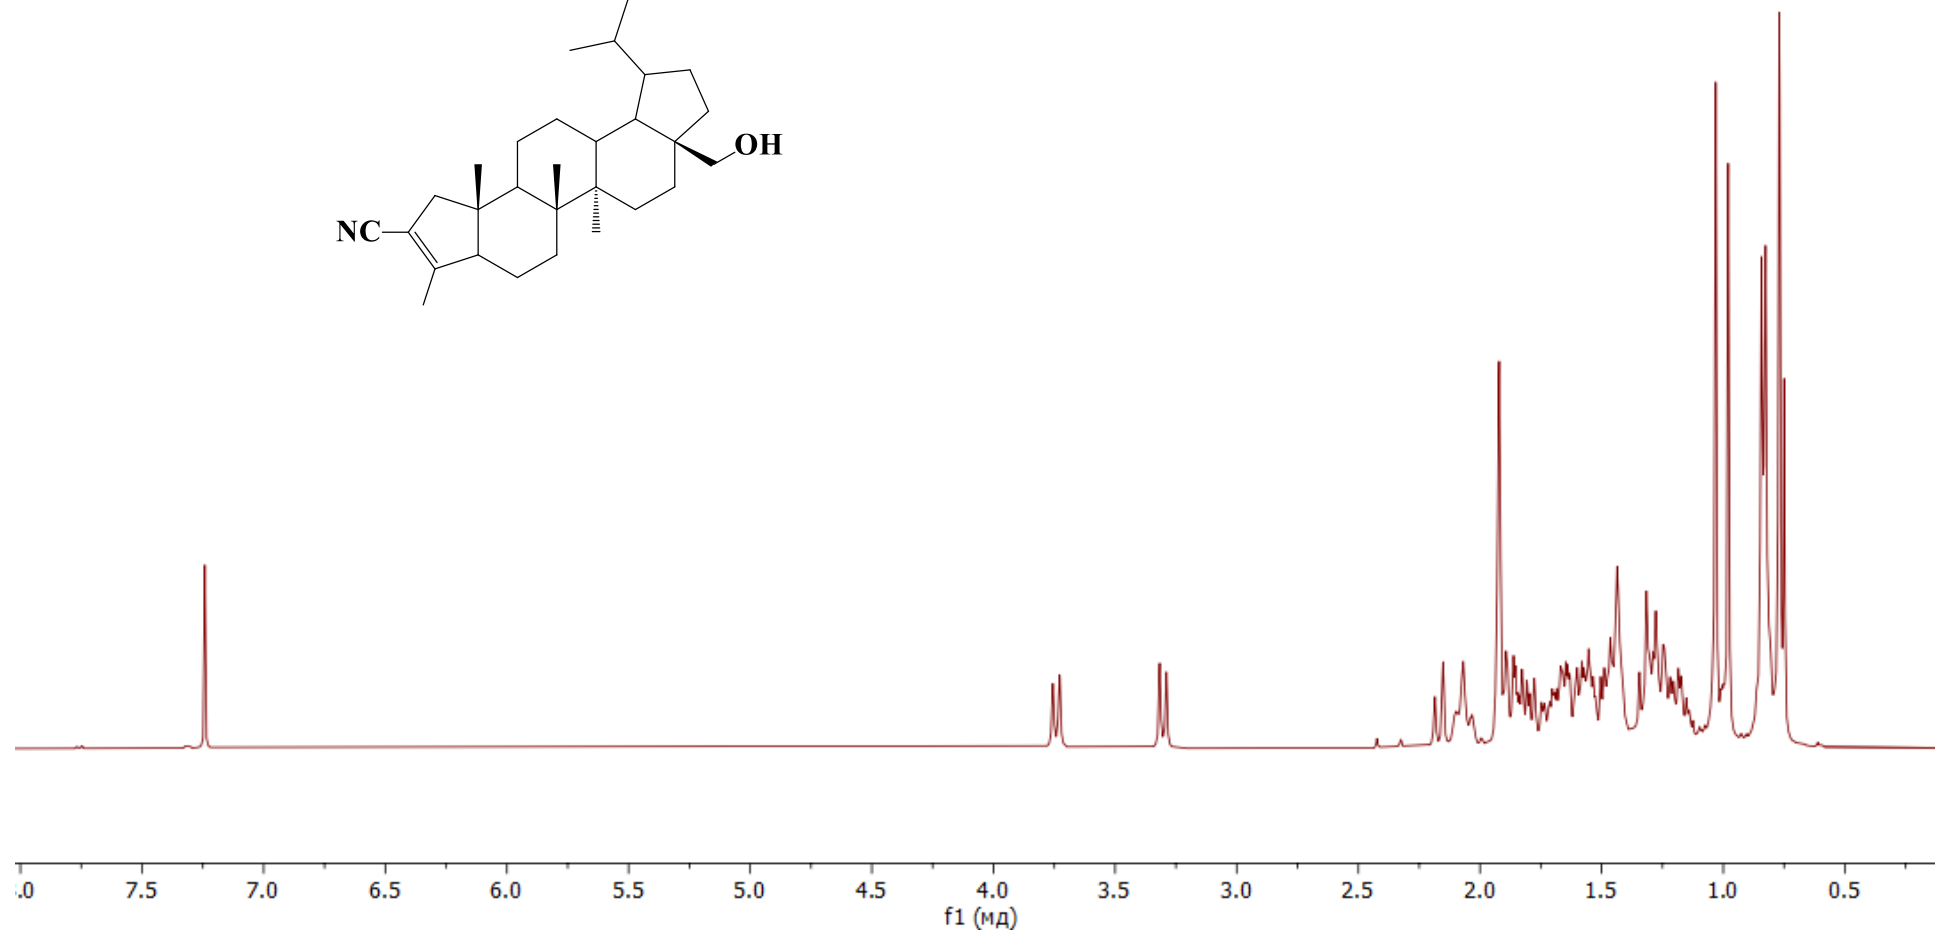

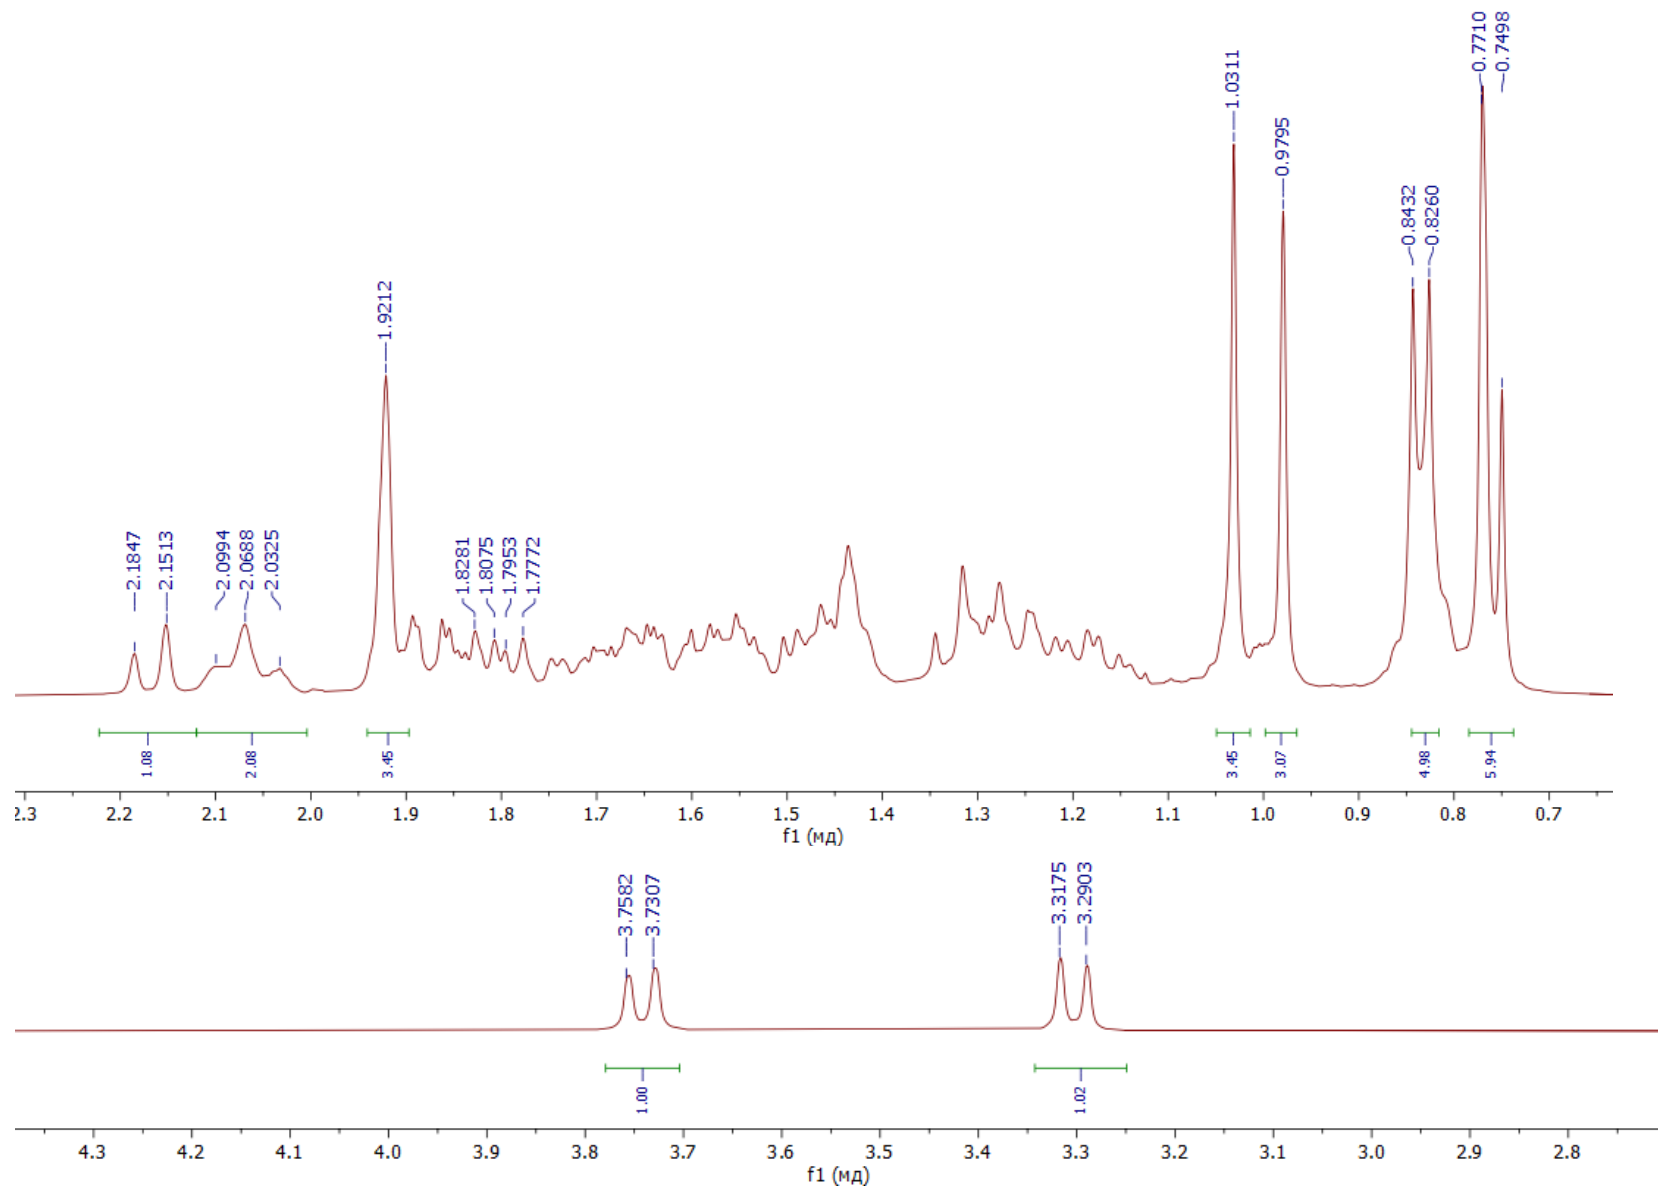

$^{13}\text{C}$  NMR spectra of 2-Cyano-28-hydroxy-3,4-seco-3,23-dinor-2,4-cyclolup-2(4)-ene (22).

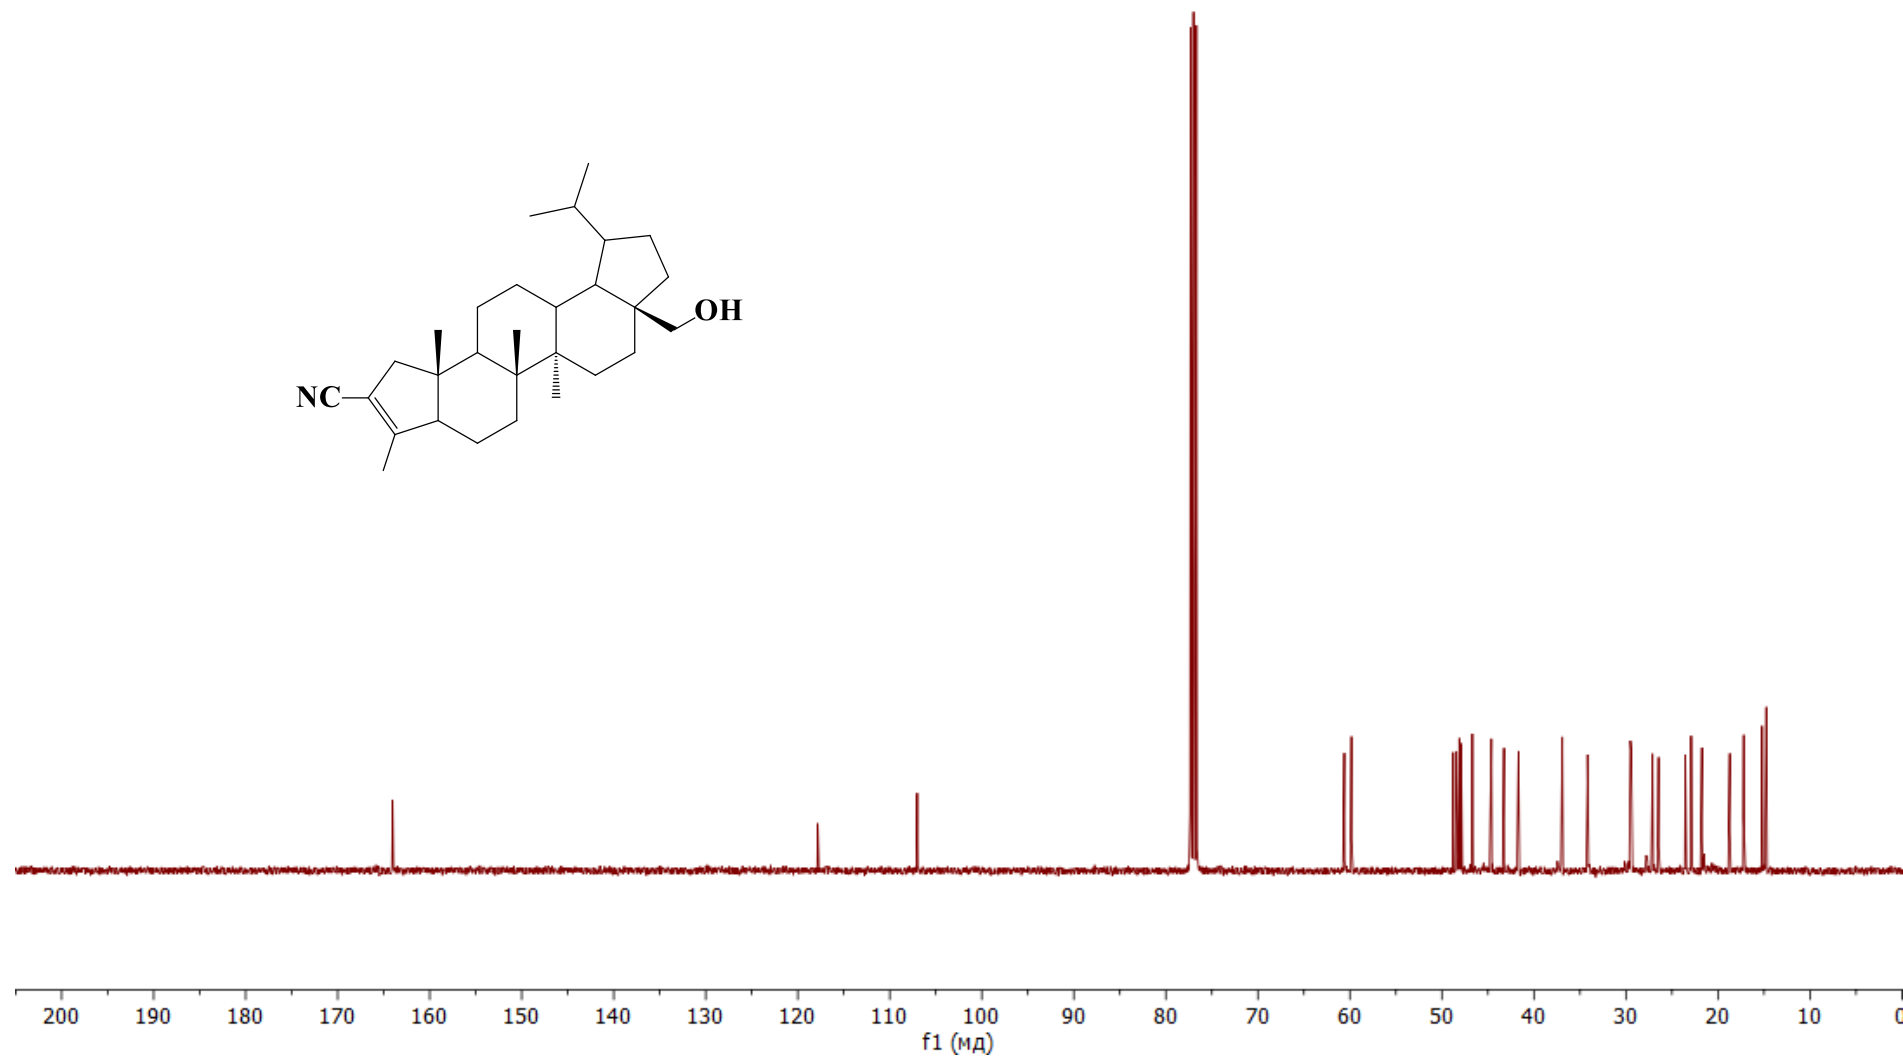

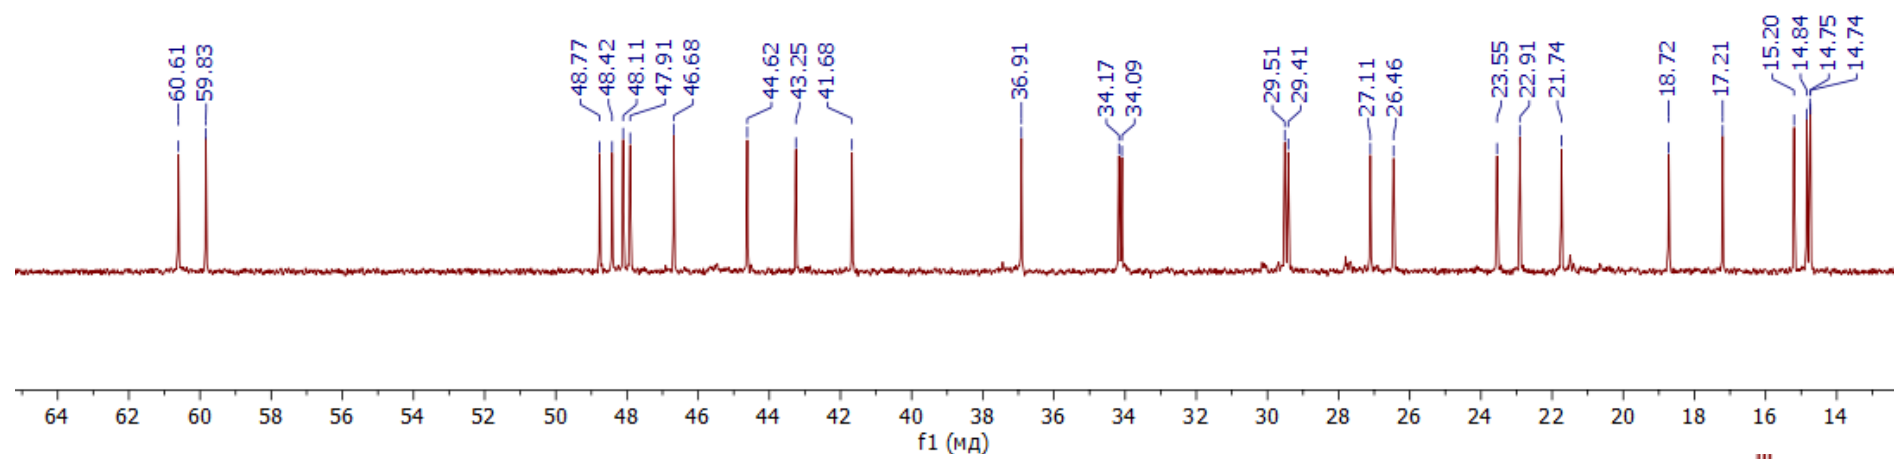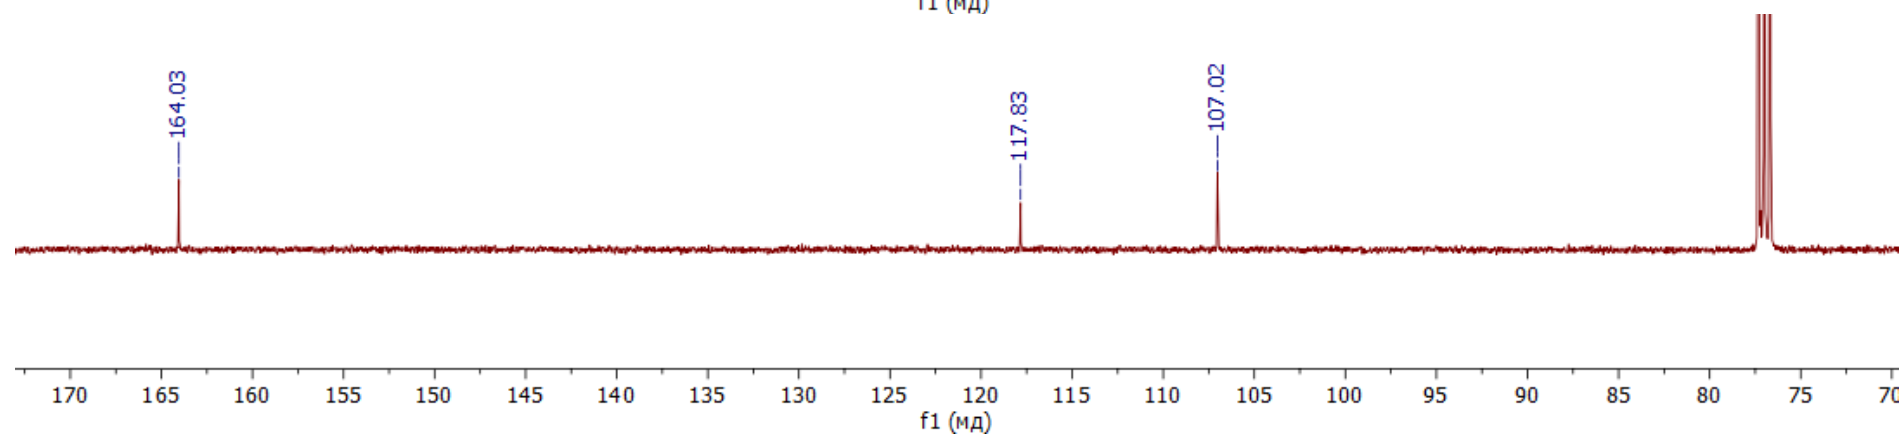



<sup>1</sup>H NMR spectra of 2-Cyano-3,4-seco-3,23-dinor-2,4-cyclolup-2(4)-en-28-oic acid methyl ester (23).

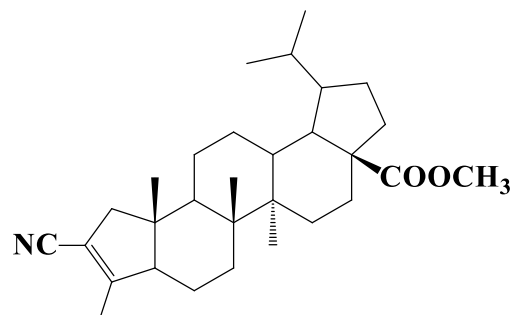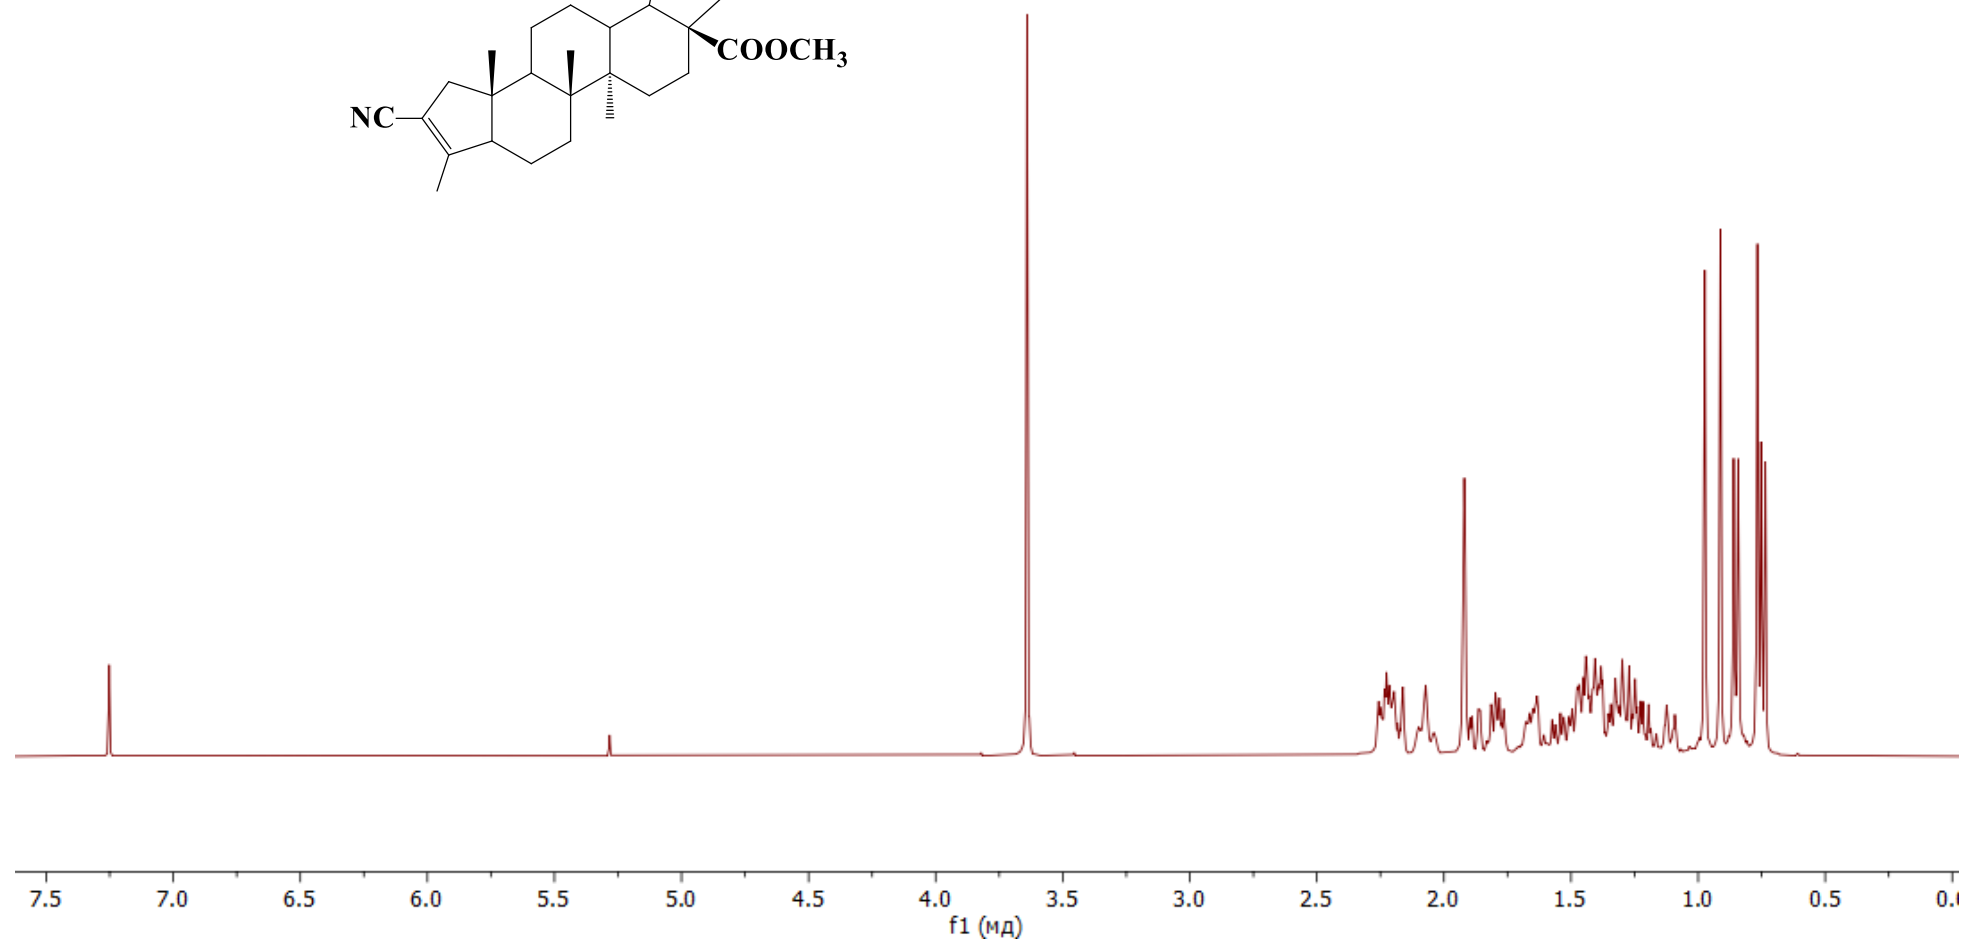

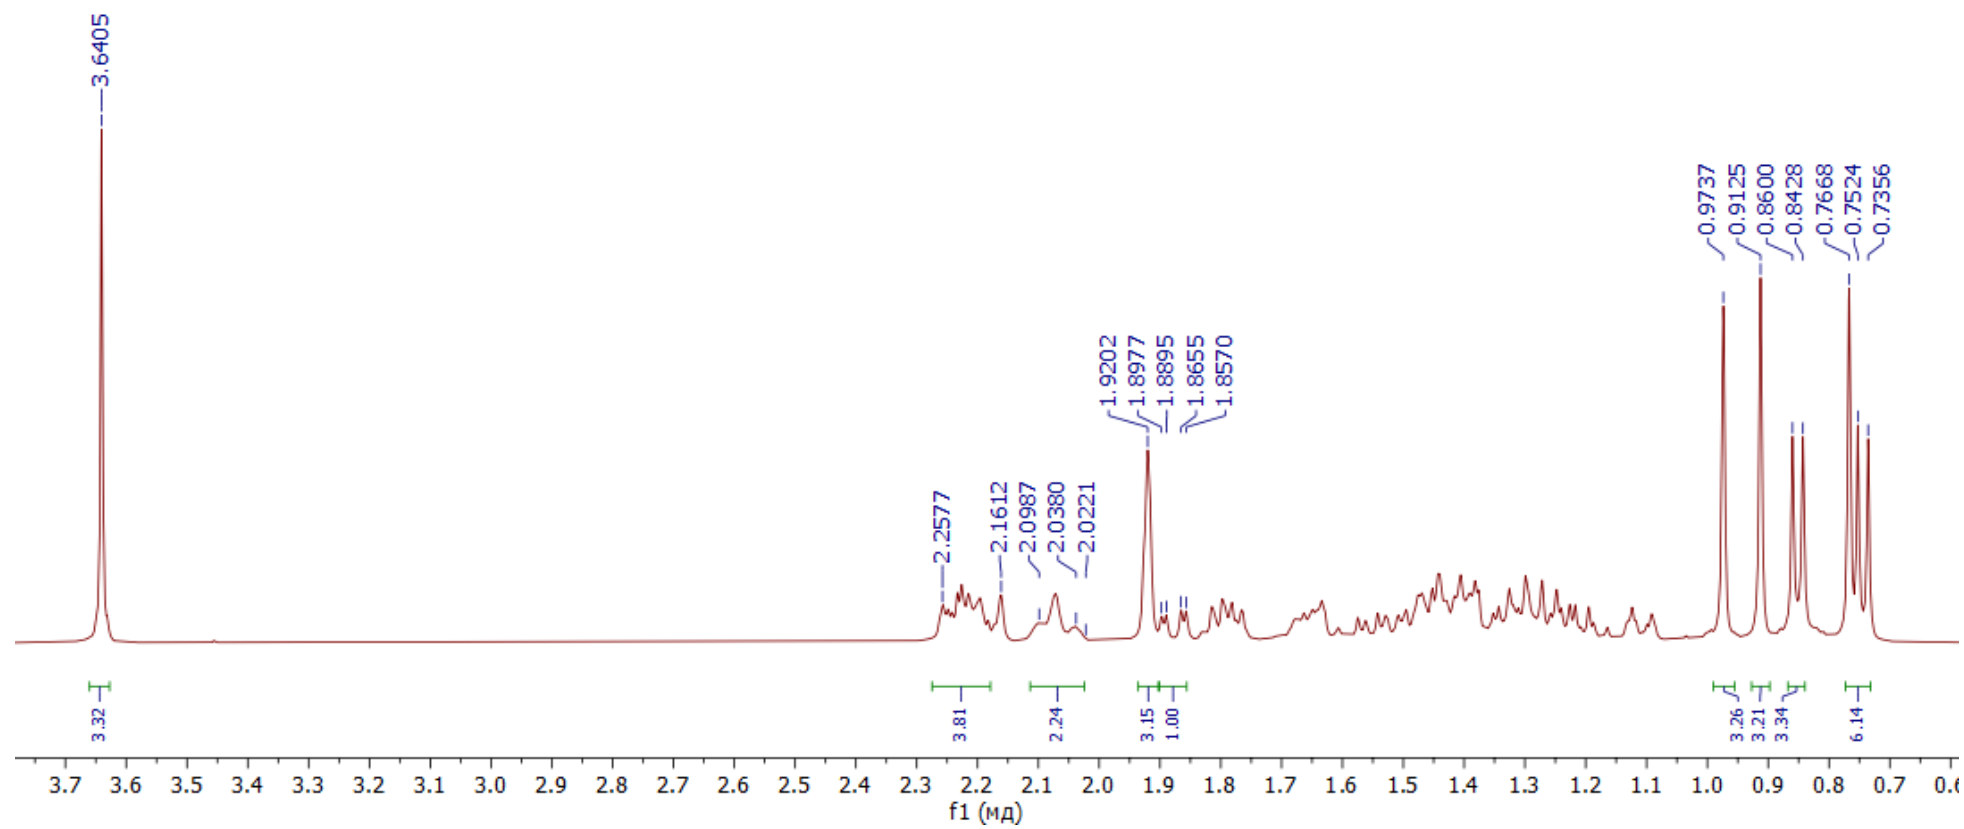

<sup>13</sup>C NMR spectra of 2-Cyano-3,4-seco-3,23-dinor-2,4-cyclolup-2(4)-en-28-oic acid methyl ester (23).

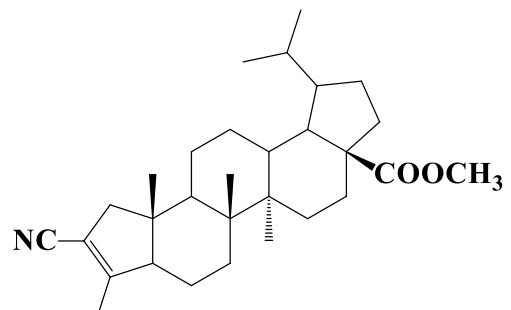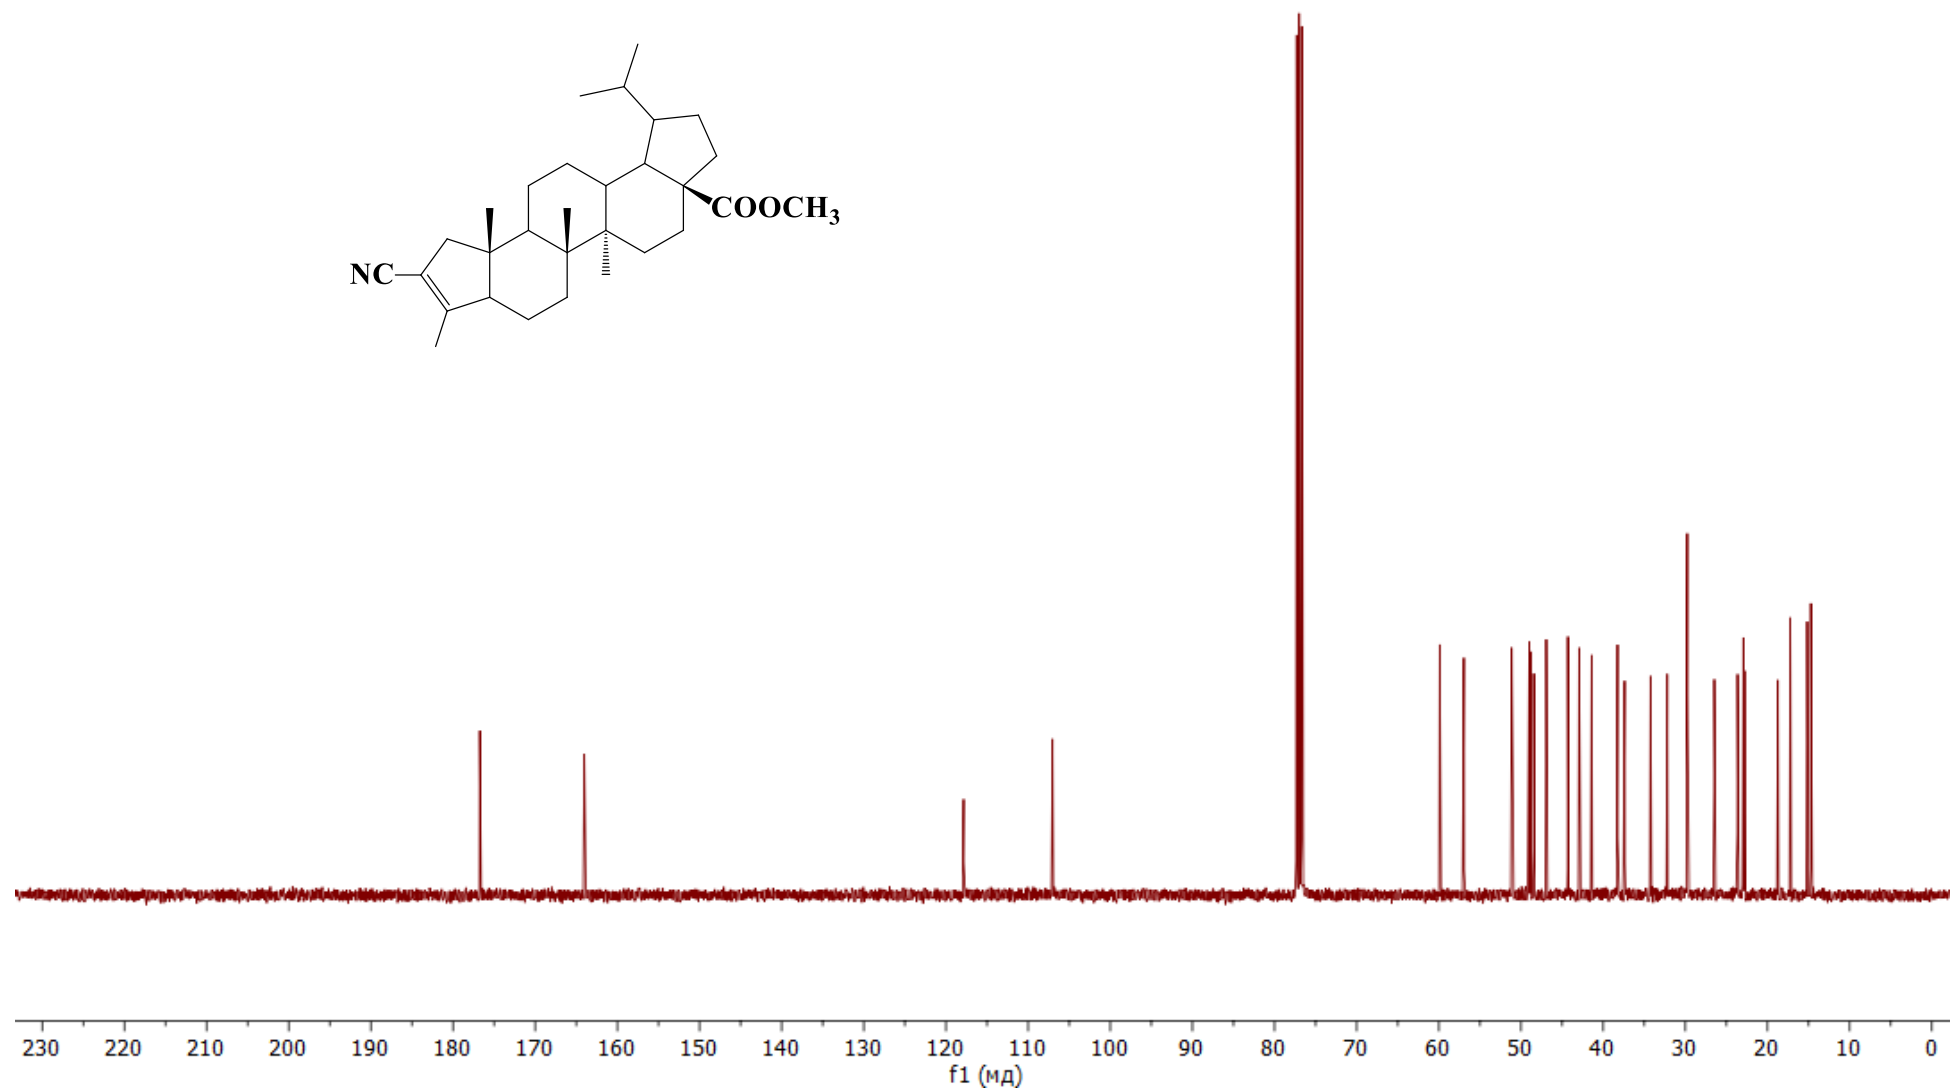

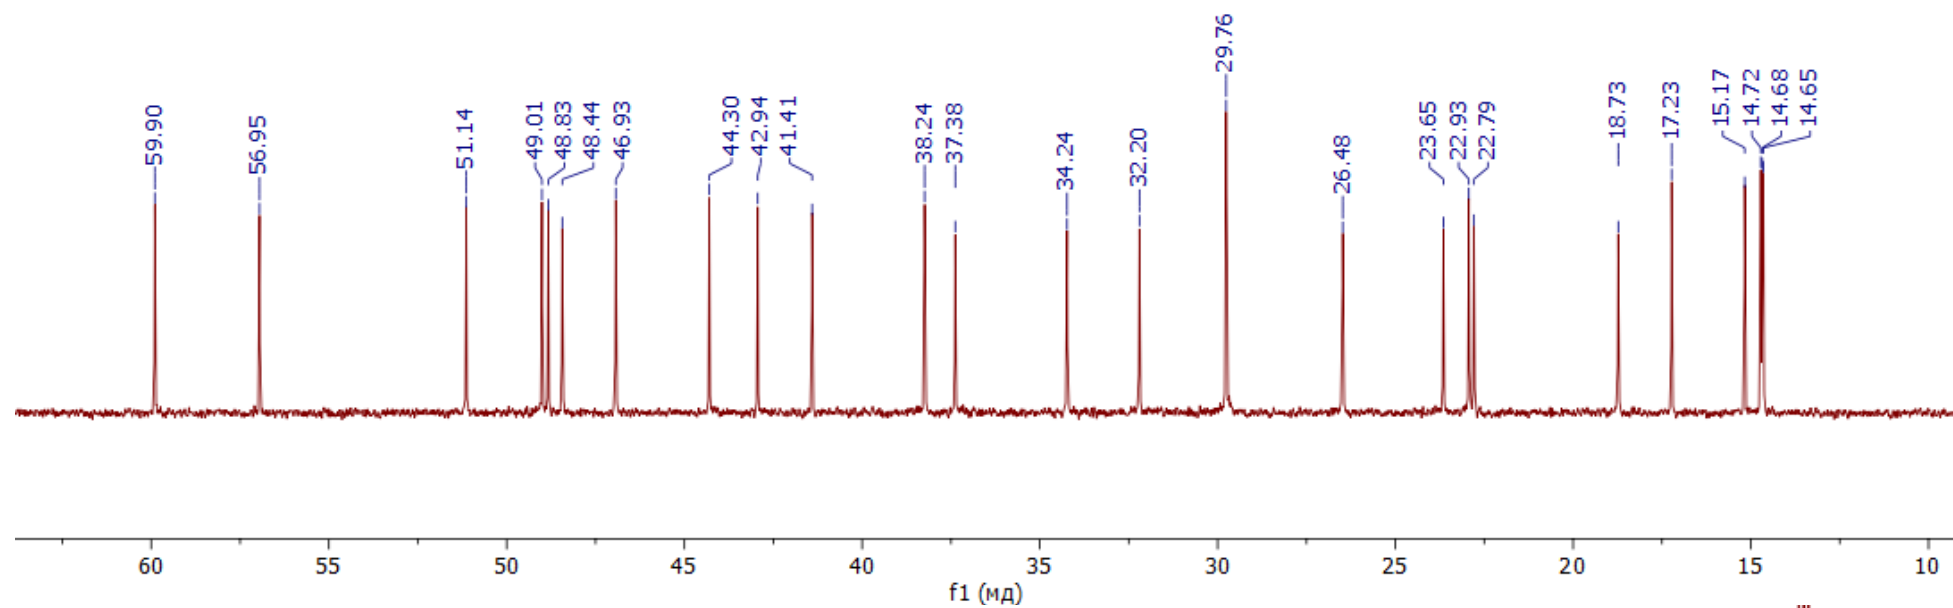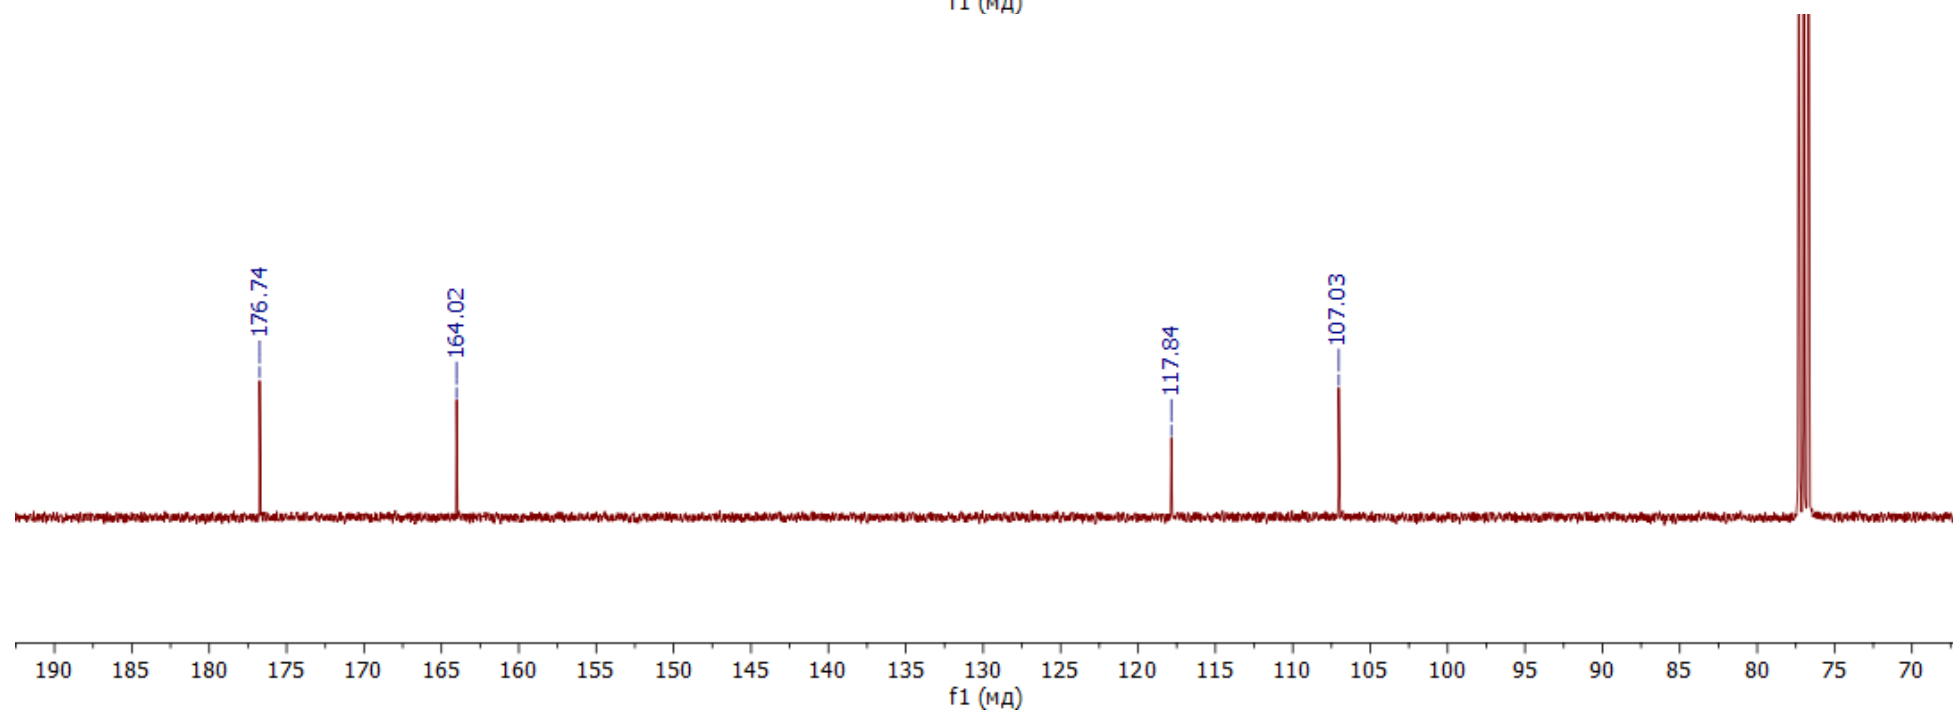

<sup>1</sup>H NMR spectra of 28-Benzoyloxy-24-bromo-2-cyano-4-oxo-3,4-seco-3,23-dinorlupan (28).

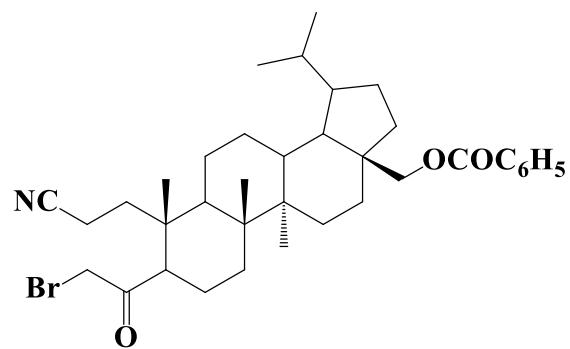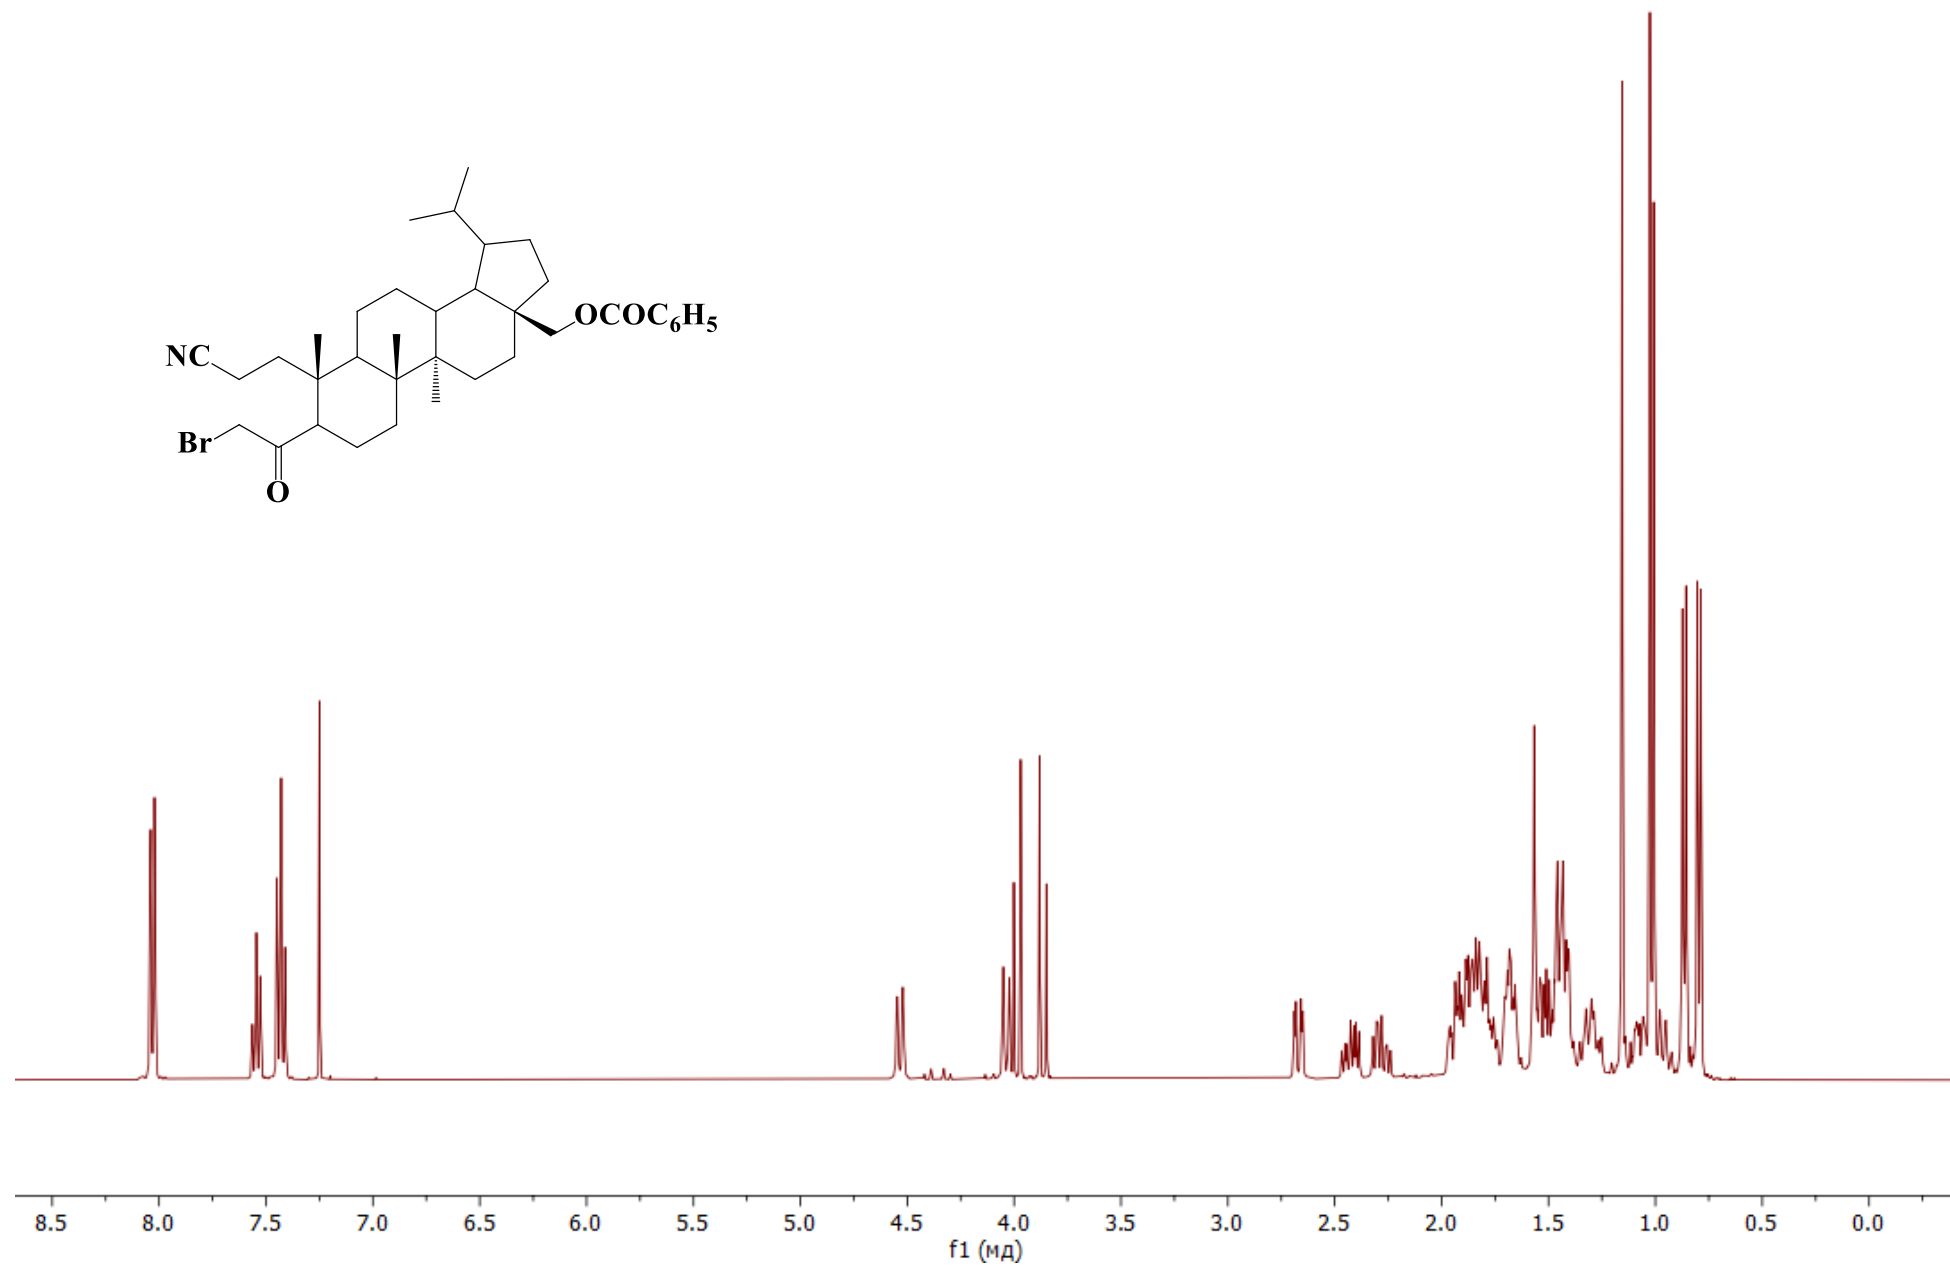

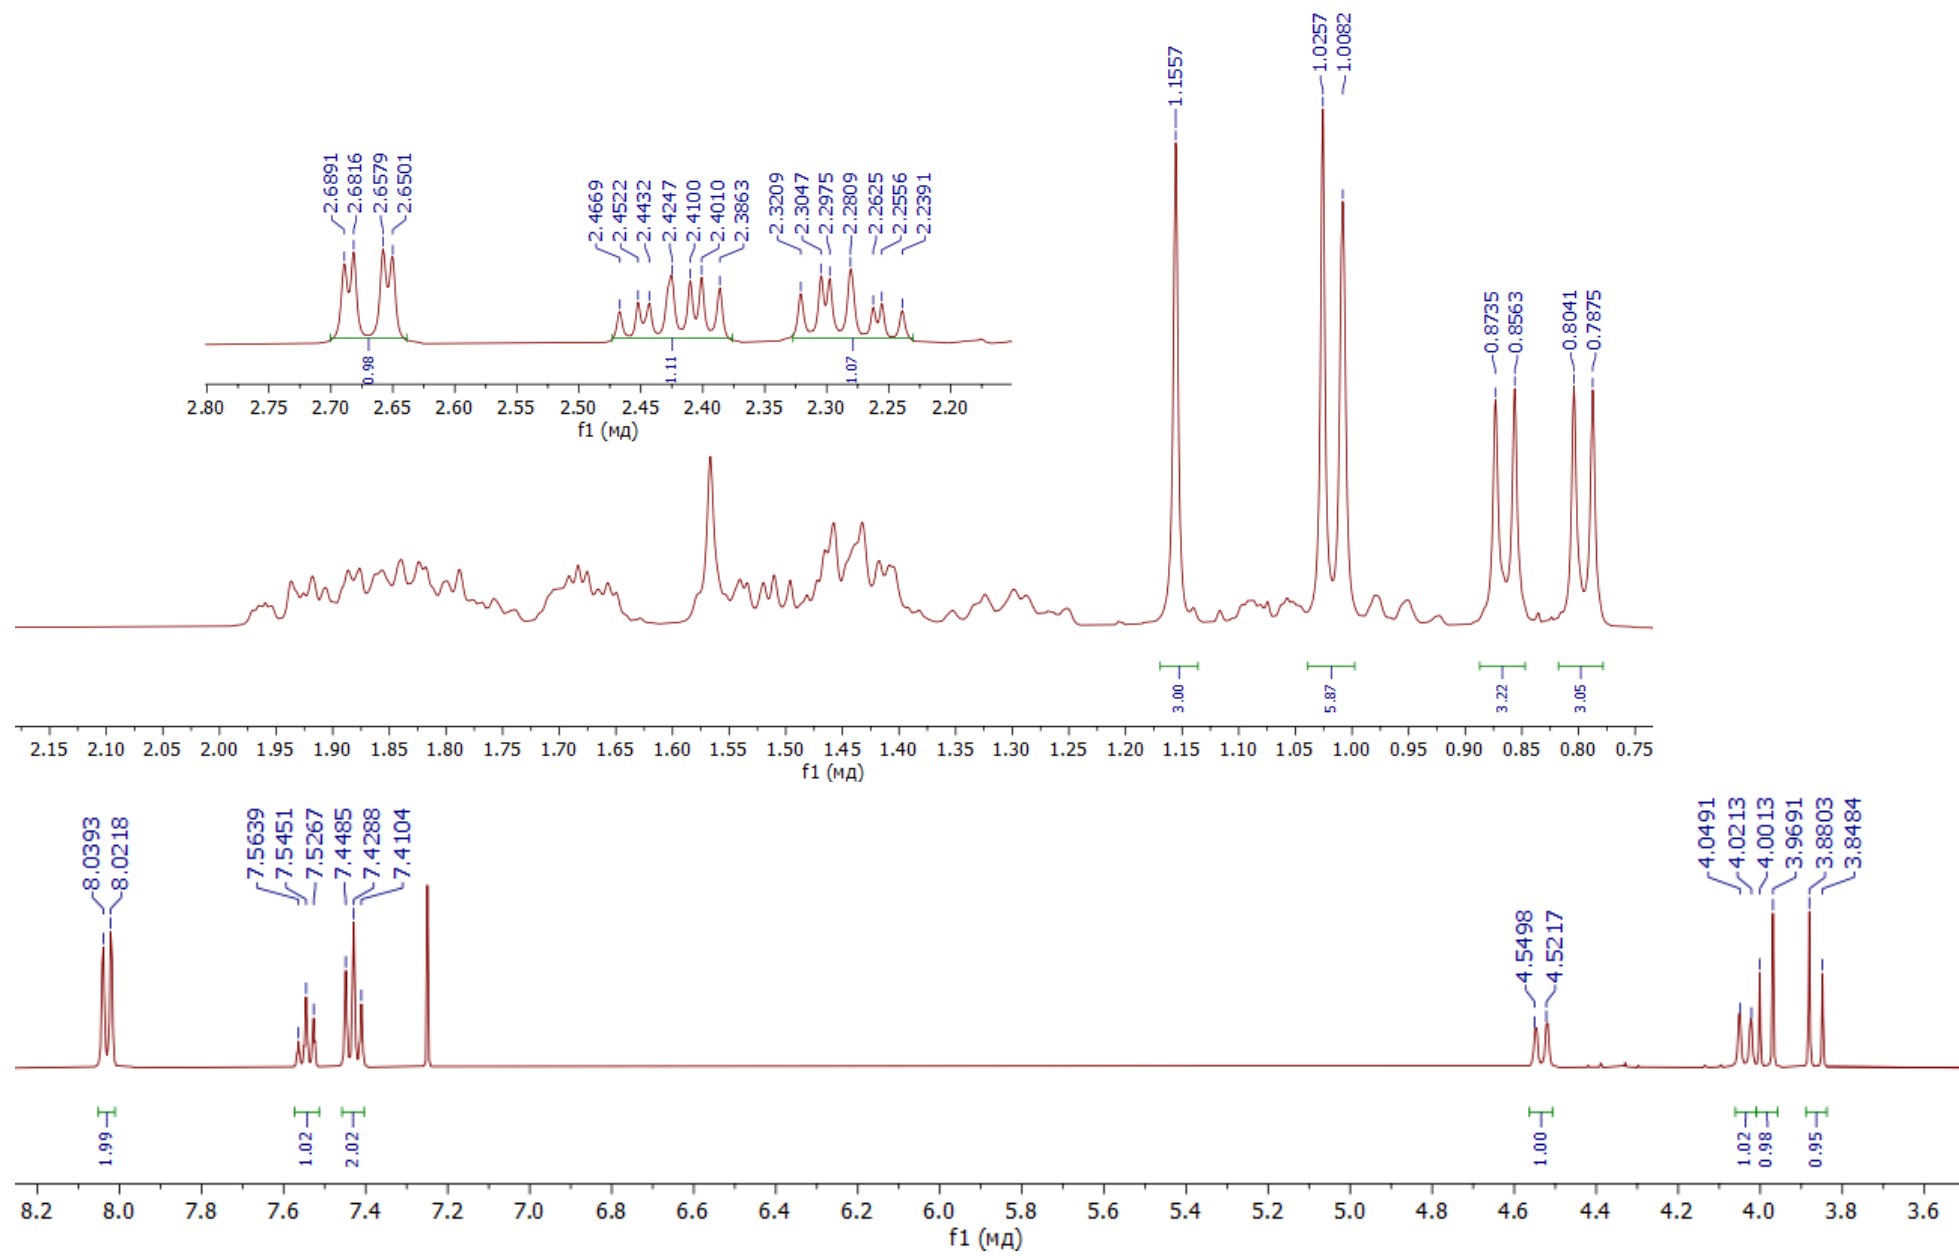

<sup>13</sup>C NMR spectra of 28-Benzoyloxy-24-bromo-2-cyano-4-oxo-3,4-seco-3,23-dinorlupan (28).

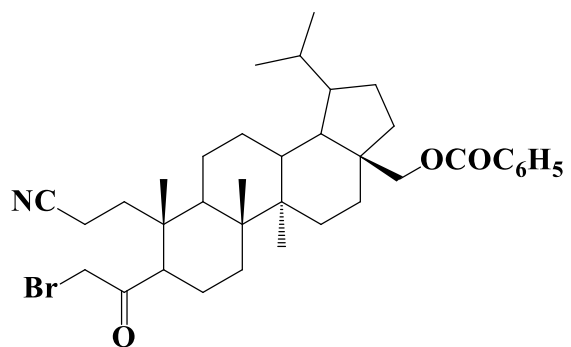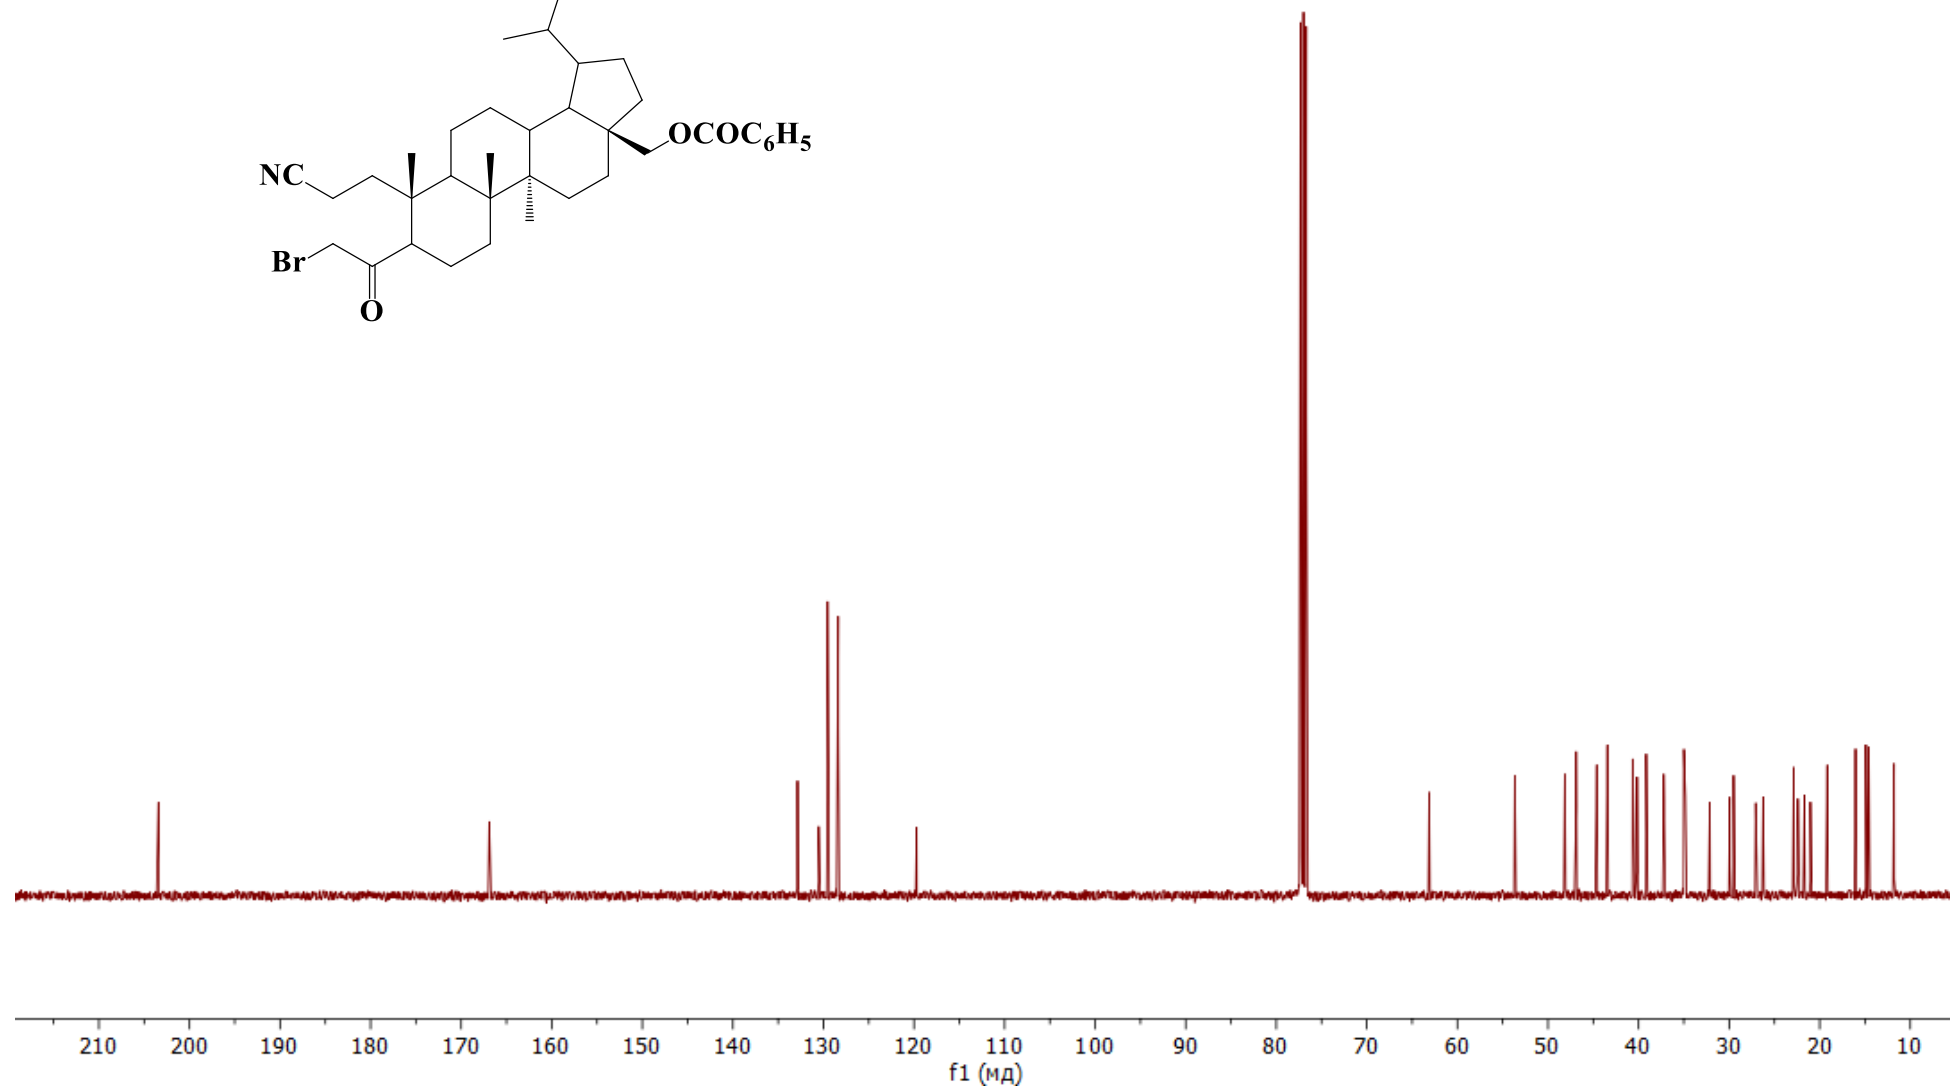

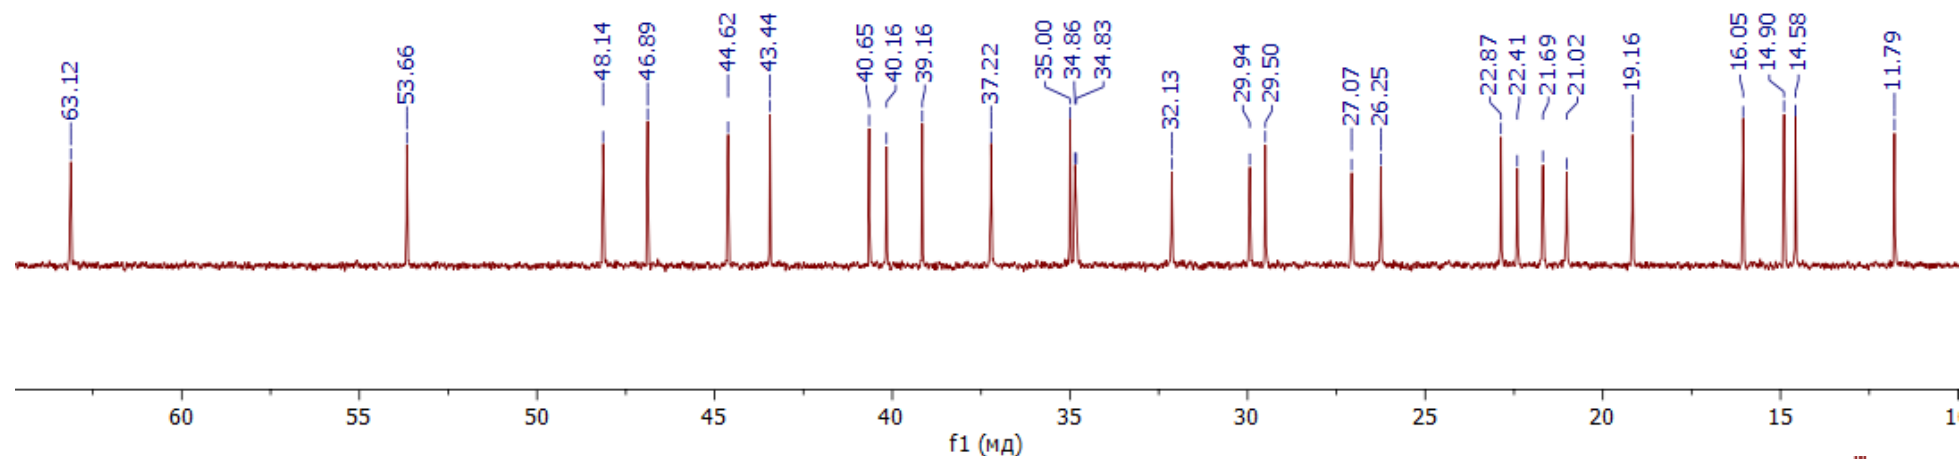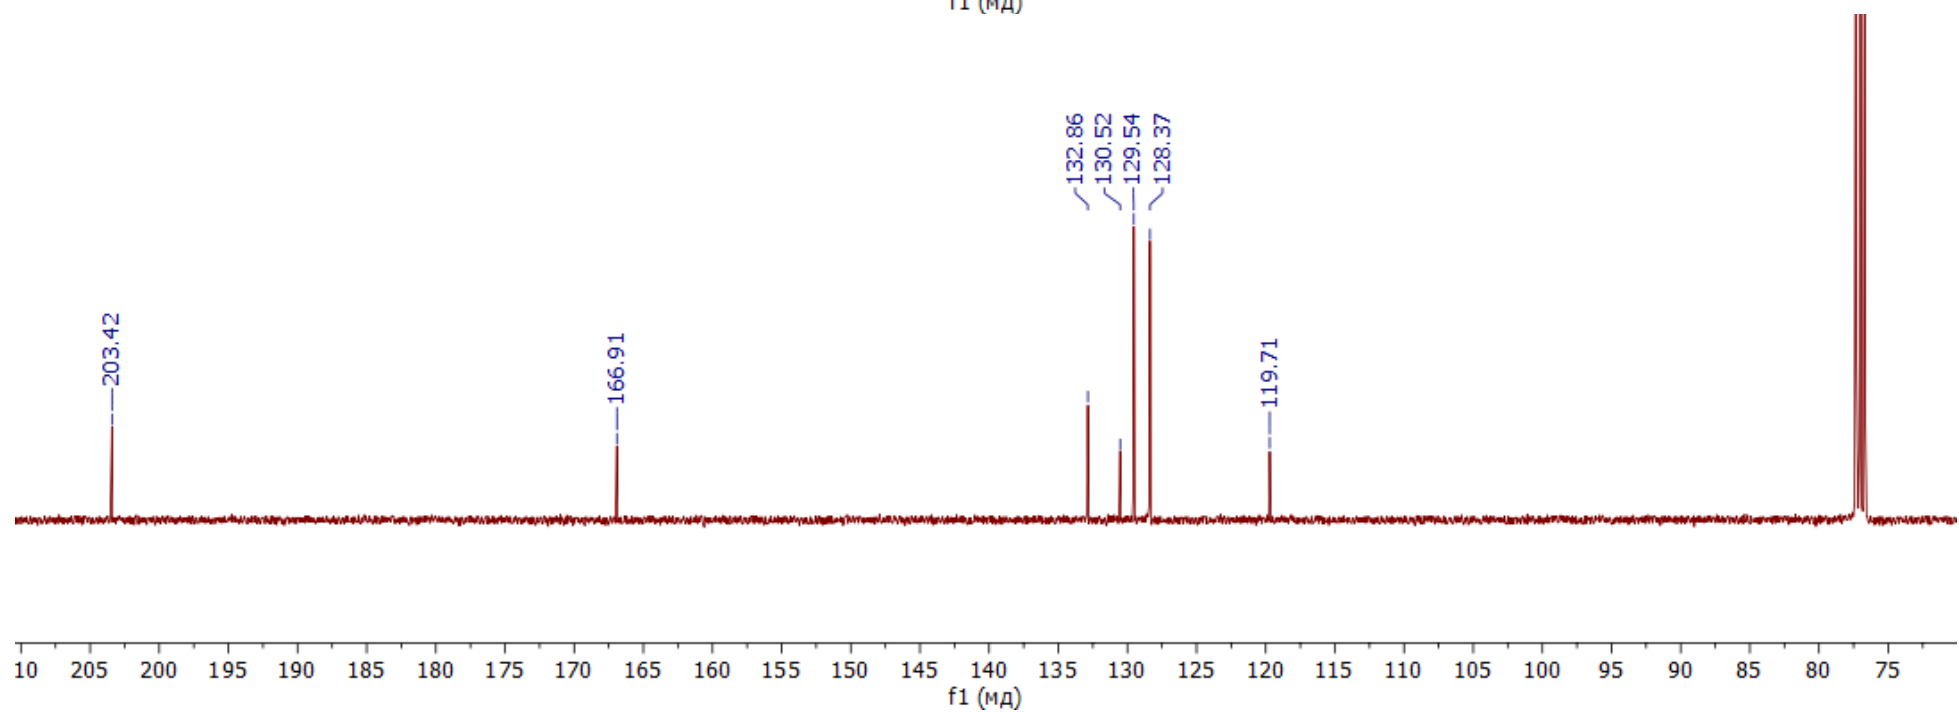



<sup>1</sup>H NMR spectra of 28-Benzoyloxy-2-cyano-24-dibromo-4-oxo-3,4-seco-3,23-dinorlupan (29).

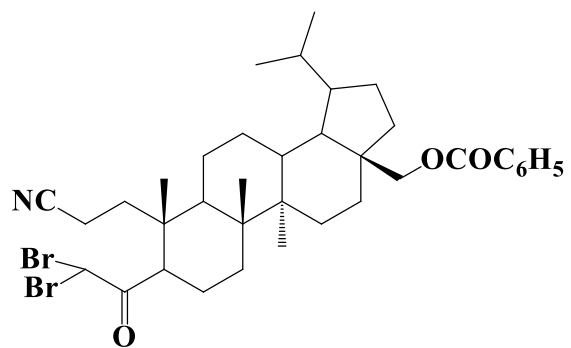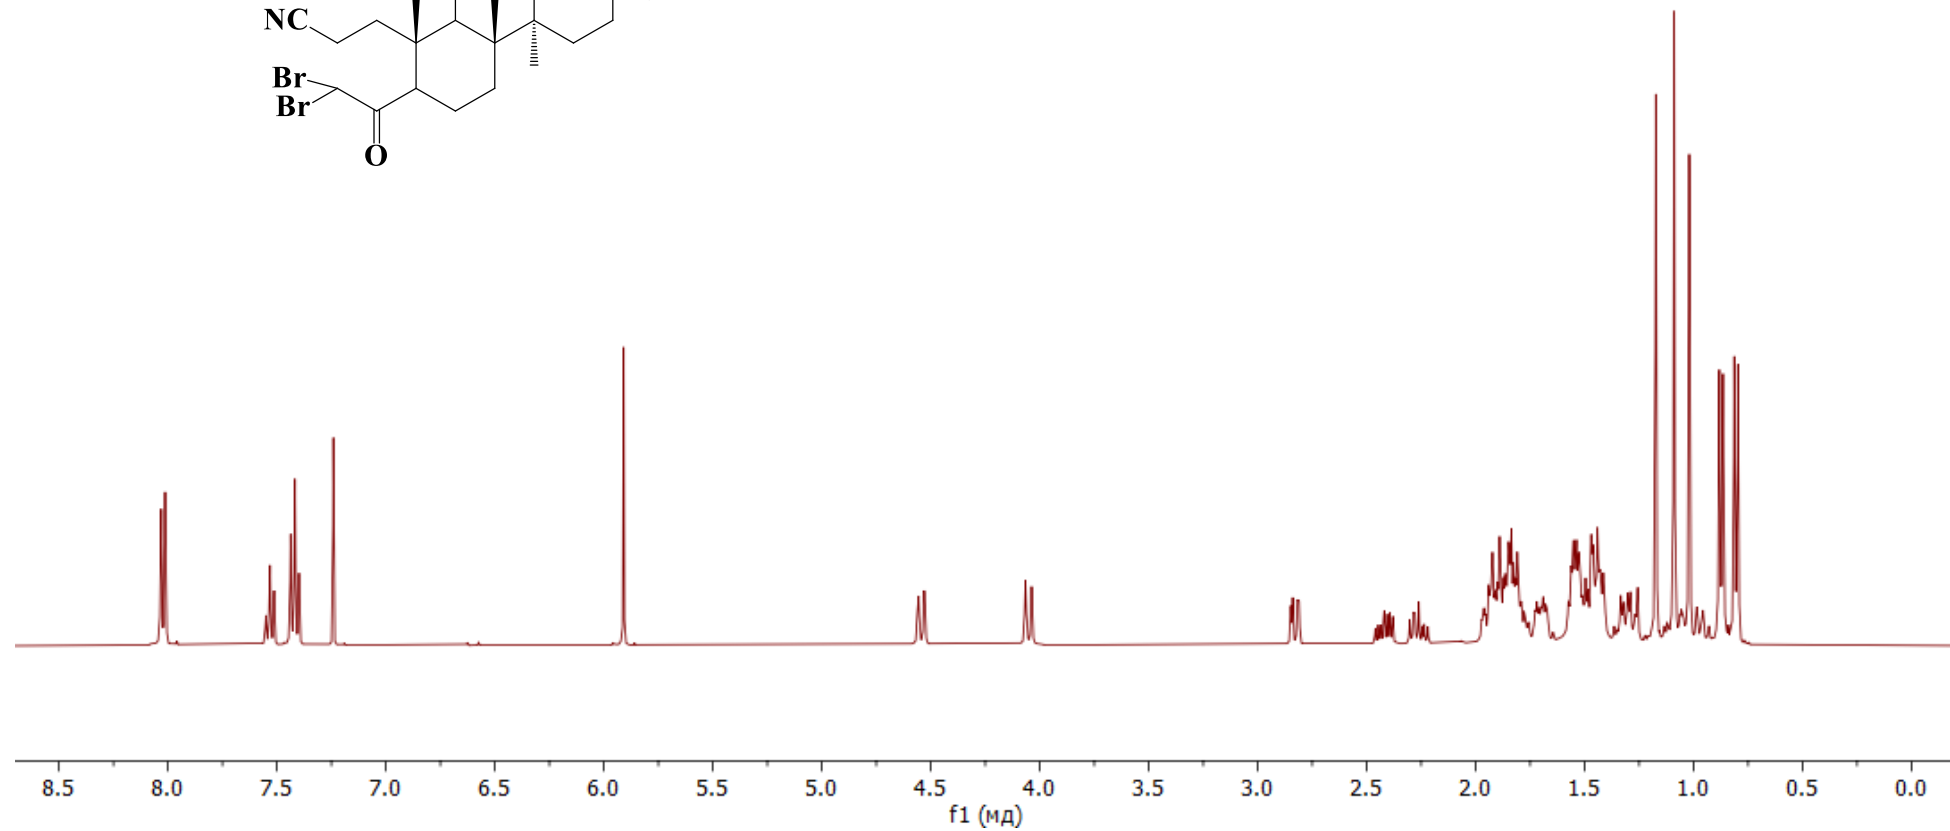

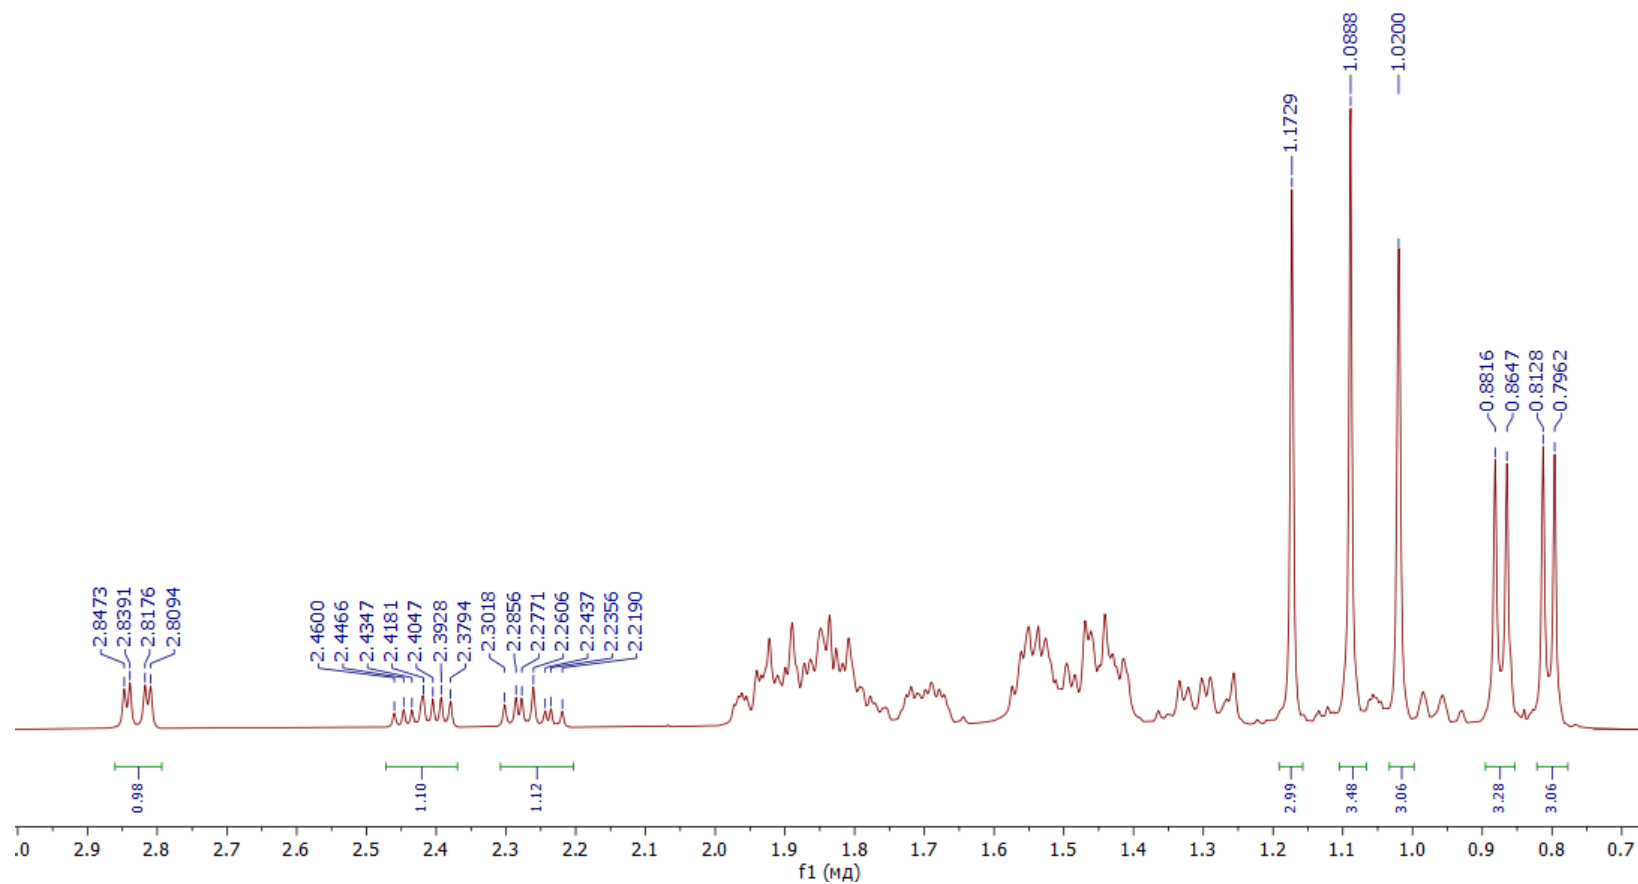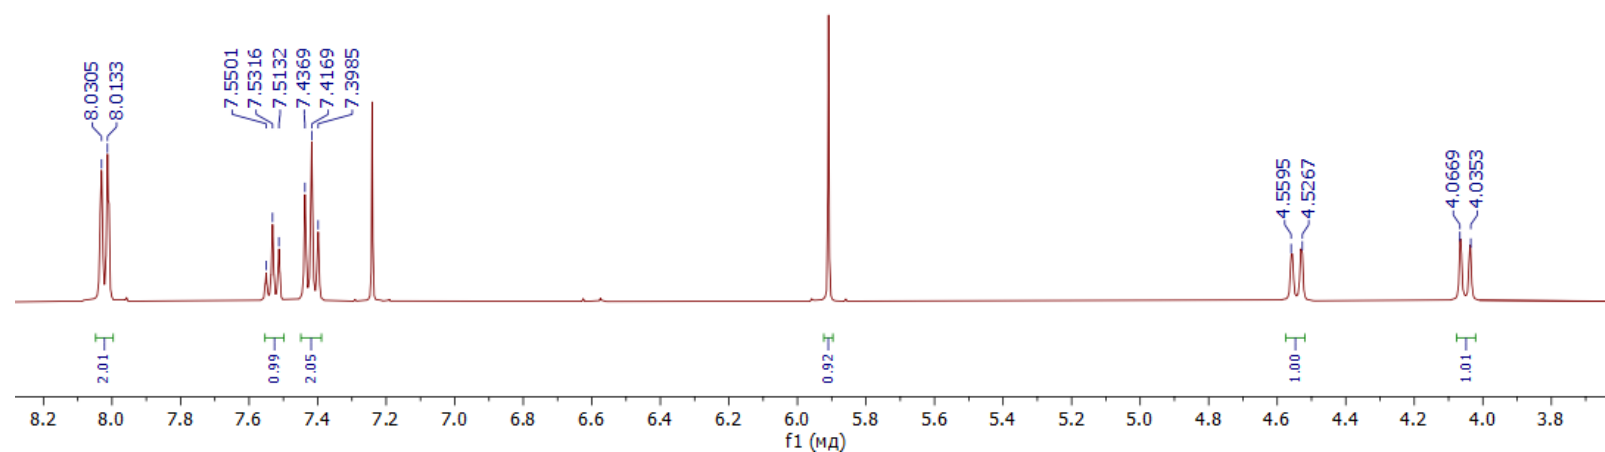

$^{13}\text{C}$  NMR spectra of 28-Benzoyloxy-2-cyano-24-dibromo-4-oxo-3,4-seco-3,23-dinorlupan (29).

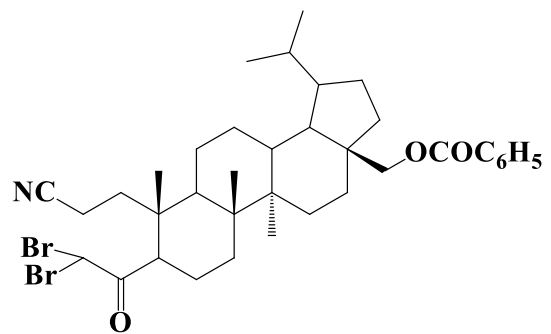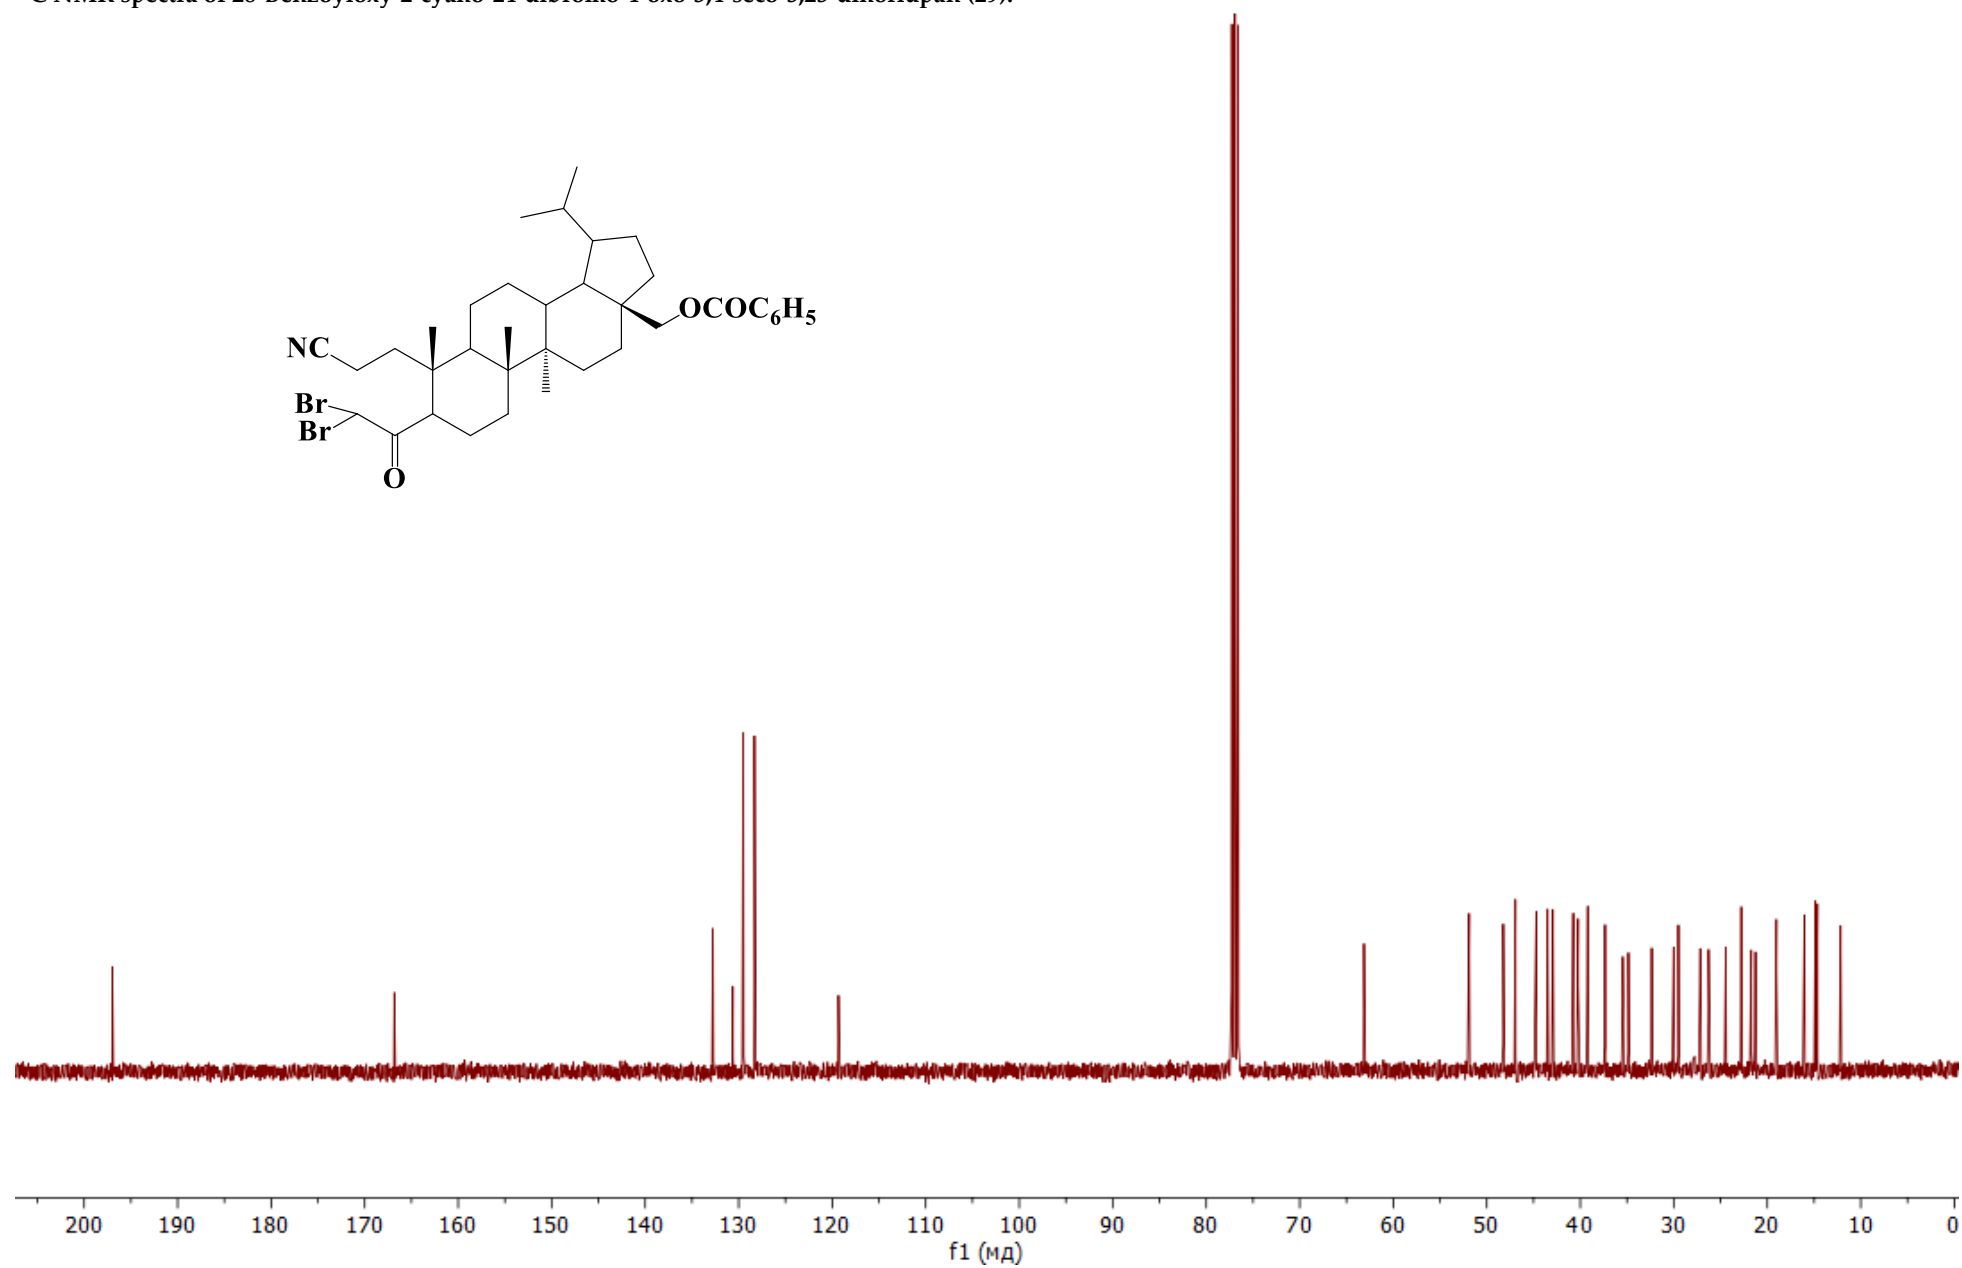

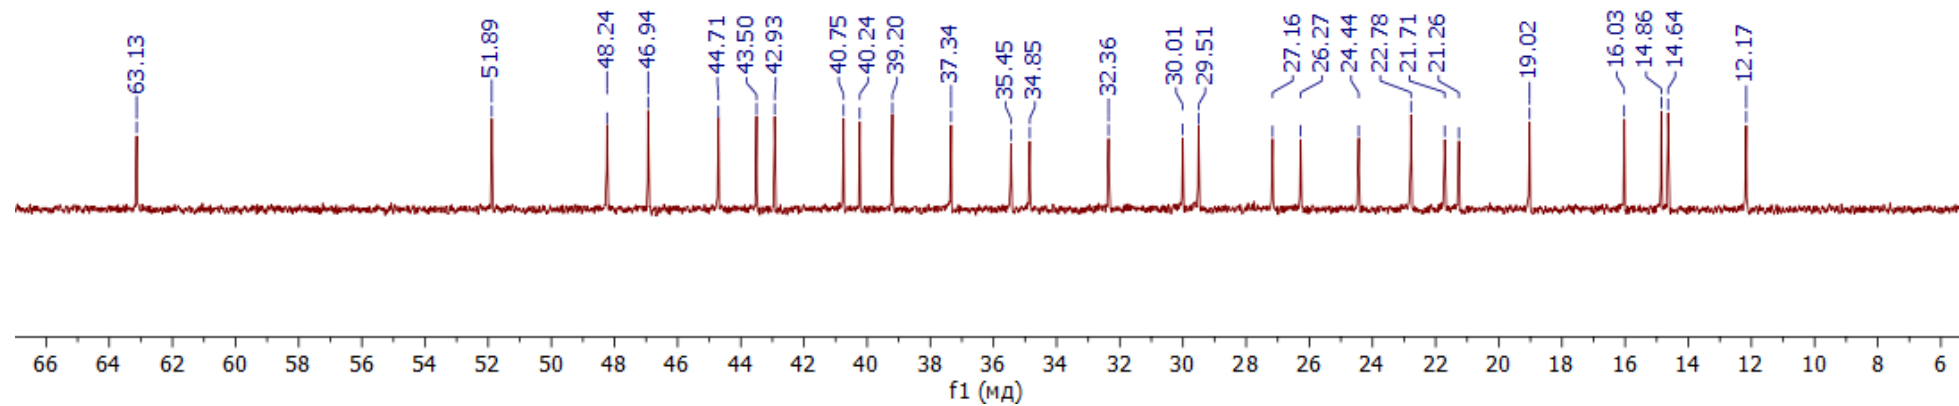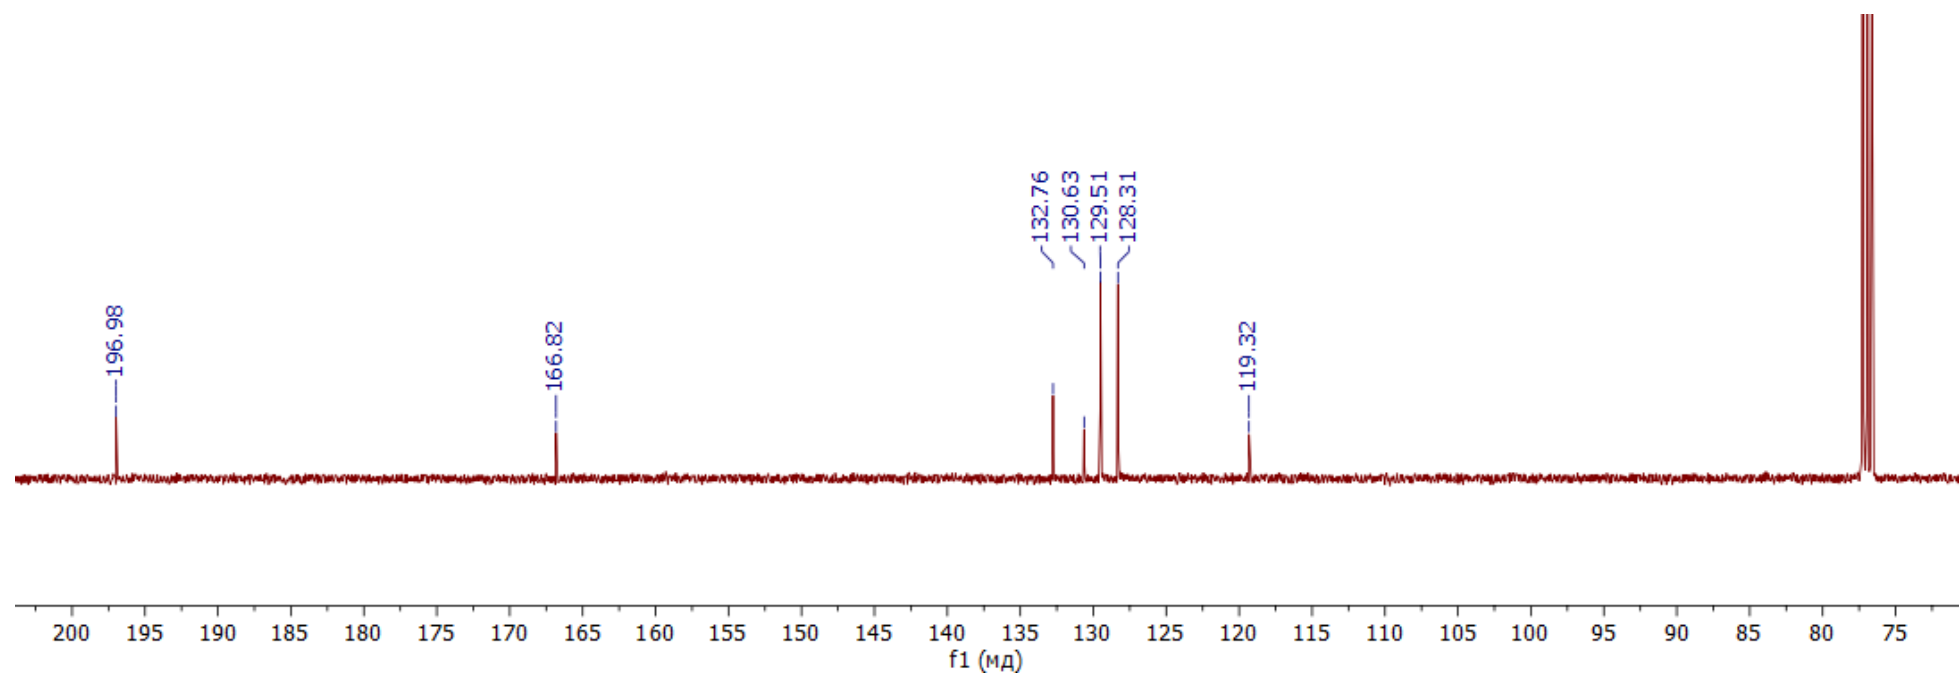

<sup>1</sup>H NMR spectra of 24-Bromo-2-cyano-4-oxo-3,4-seco-3,23-dinorlupan-28-oic acid methyl ester (30)

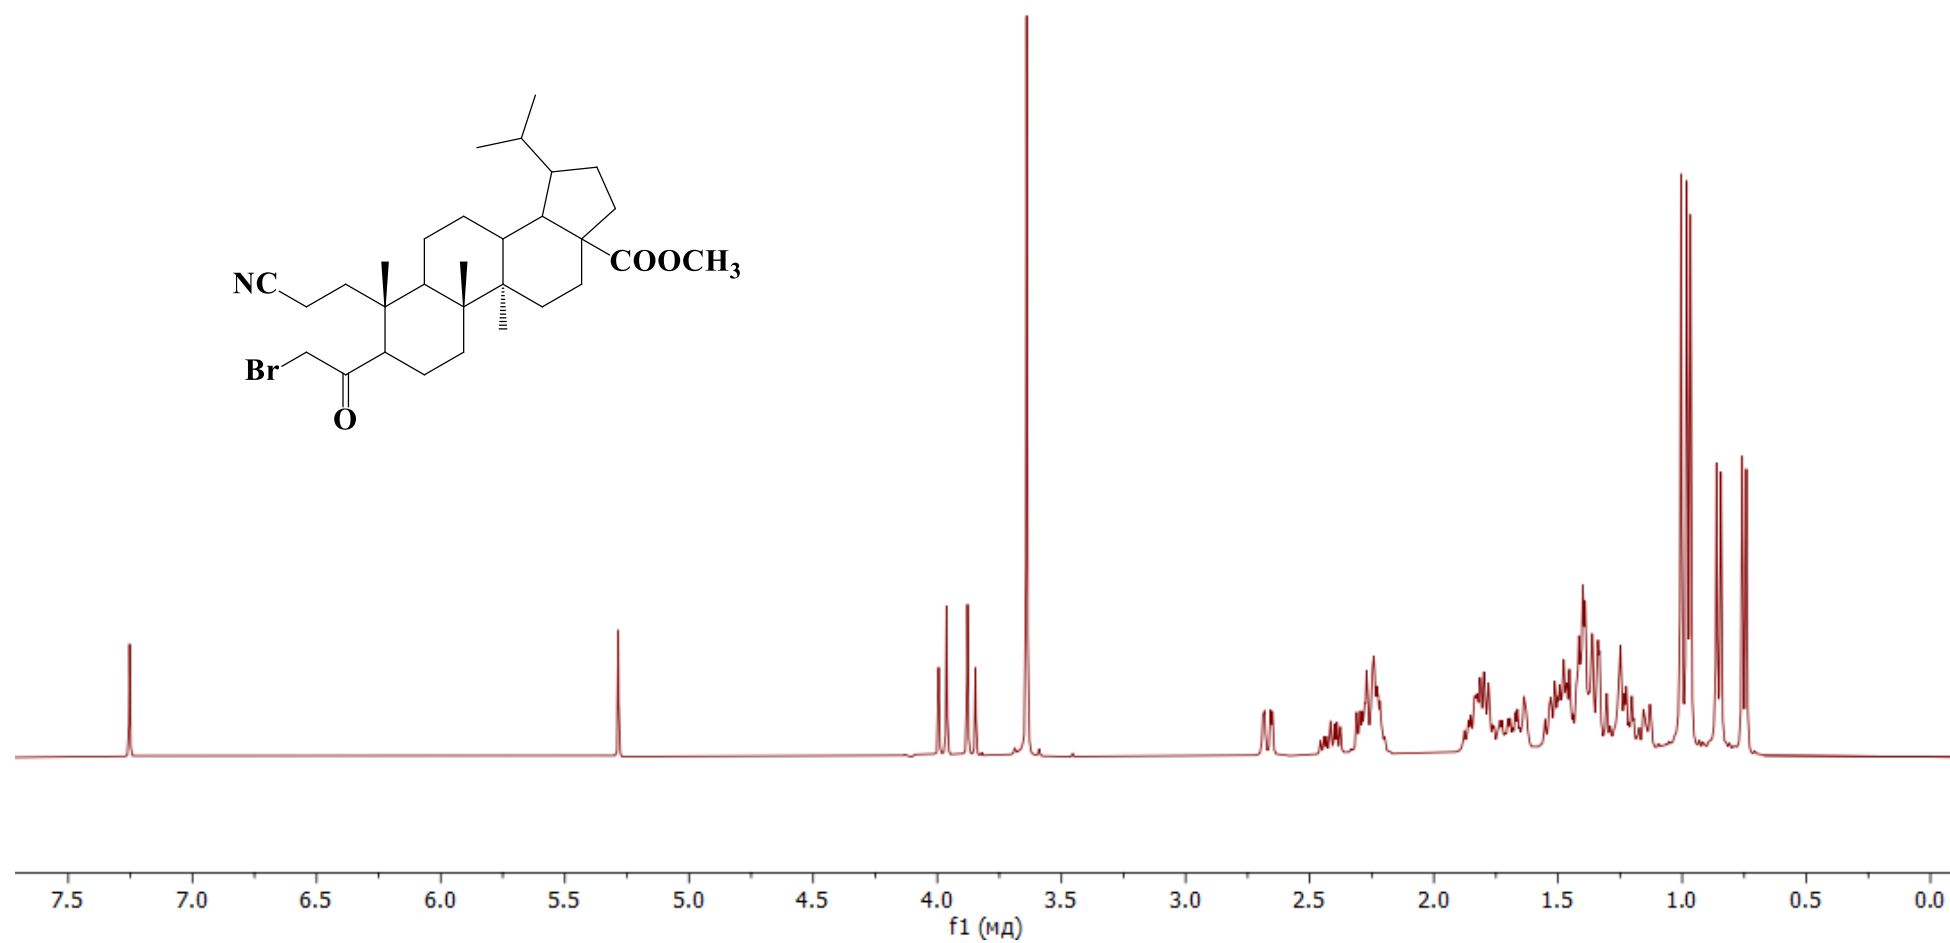

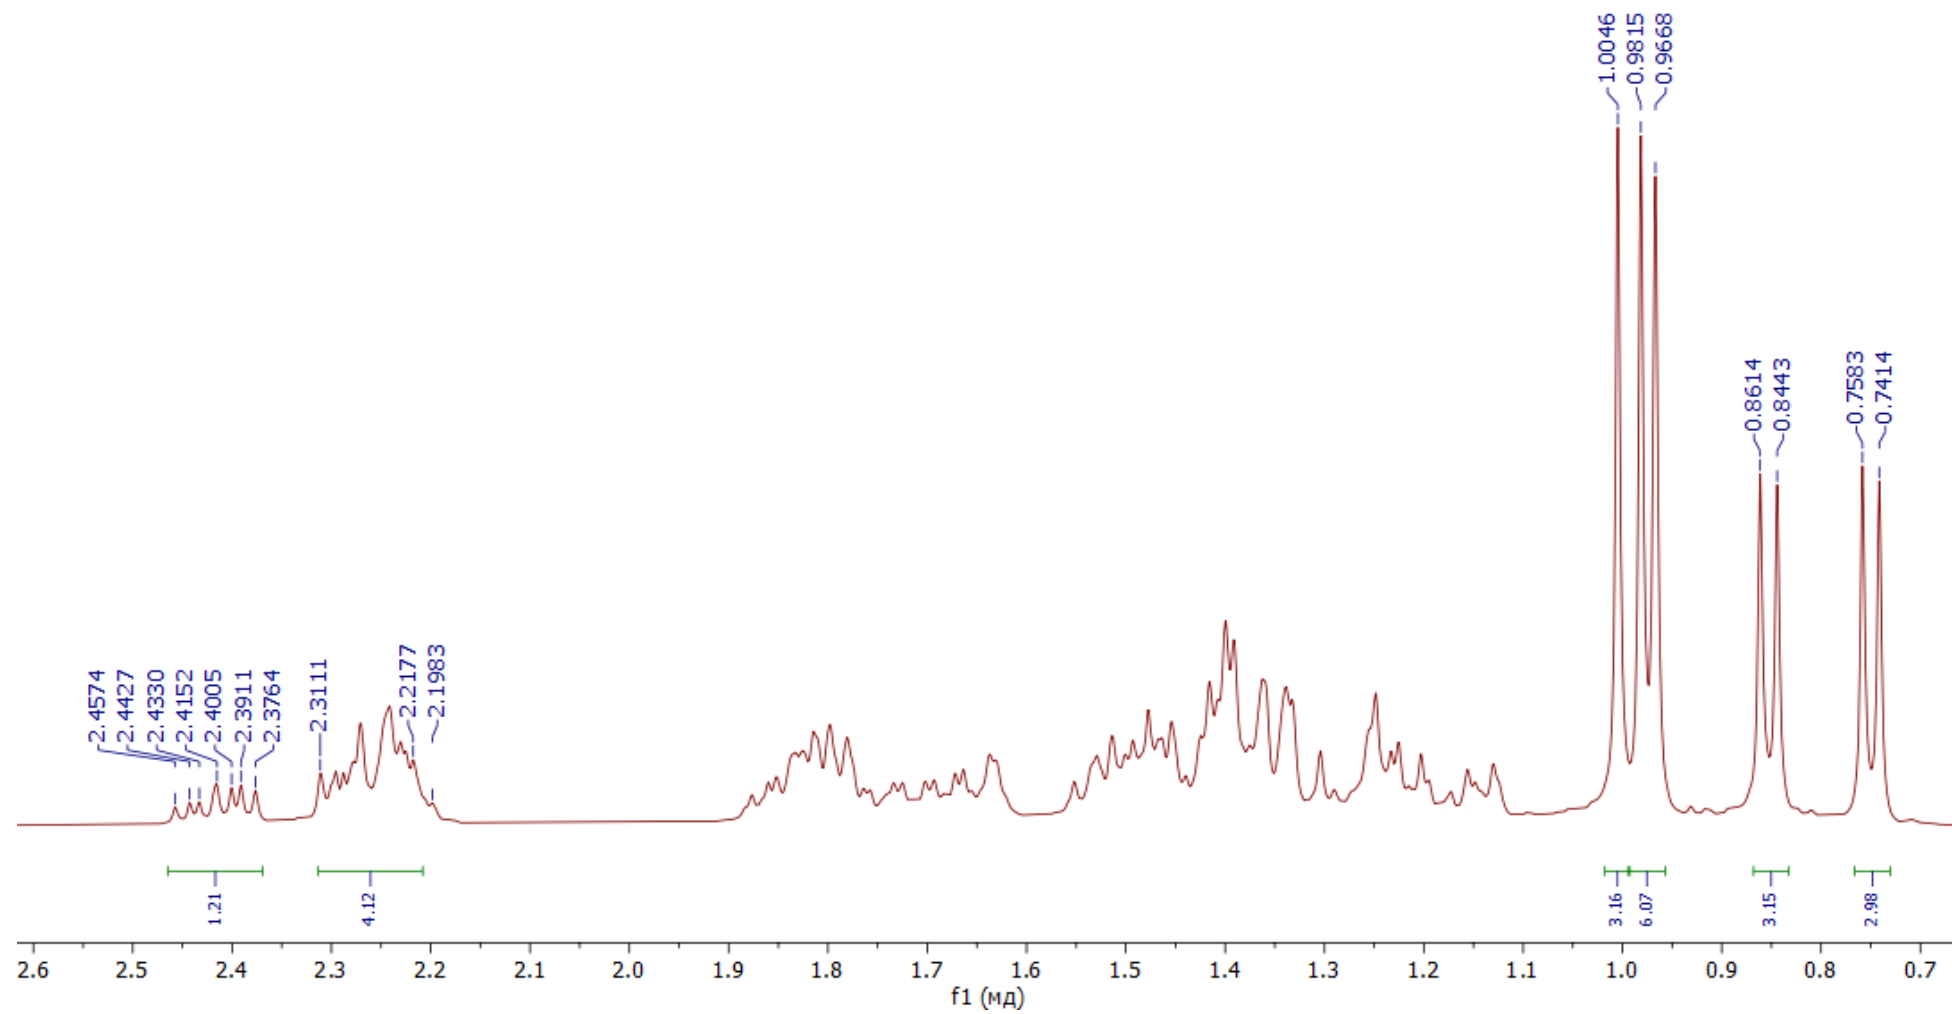

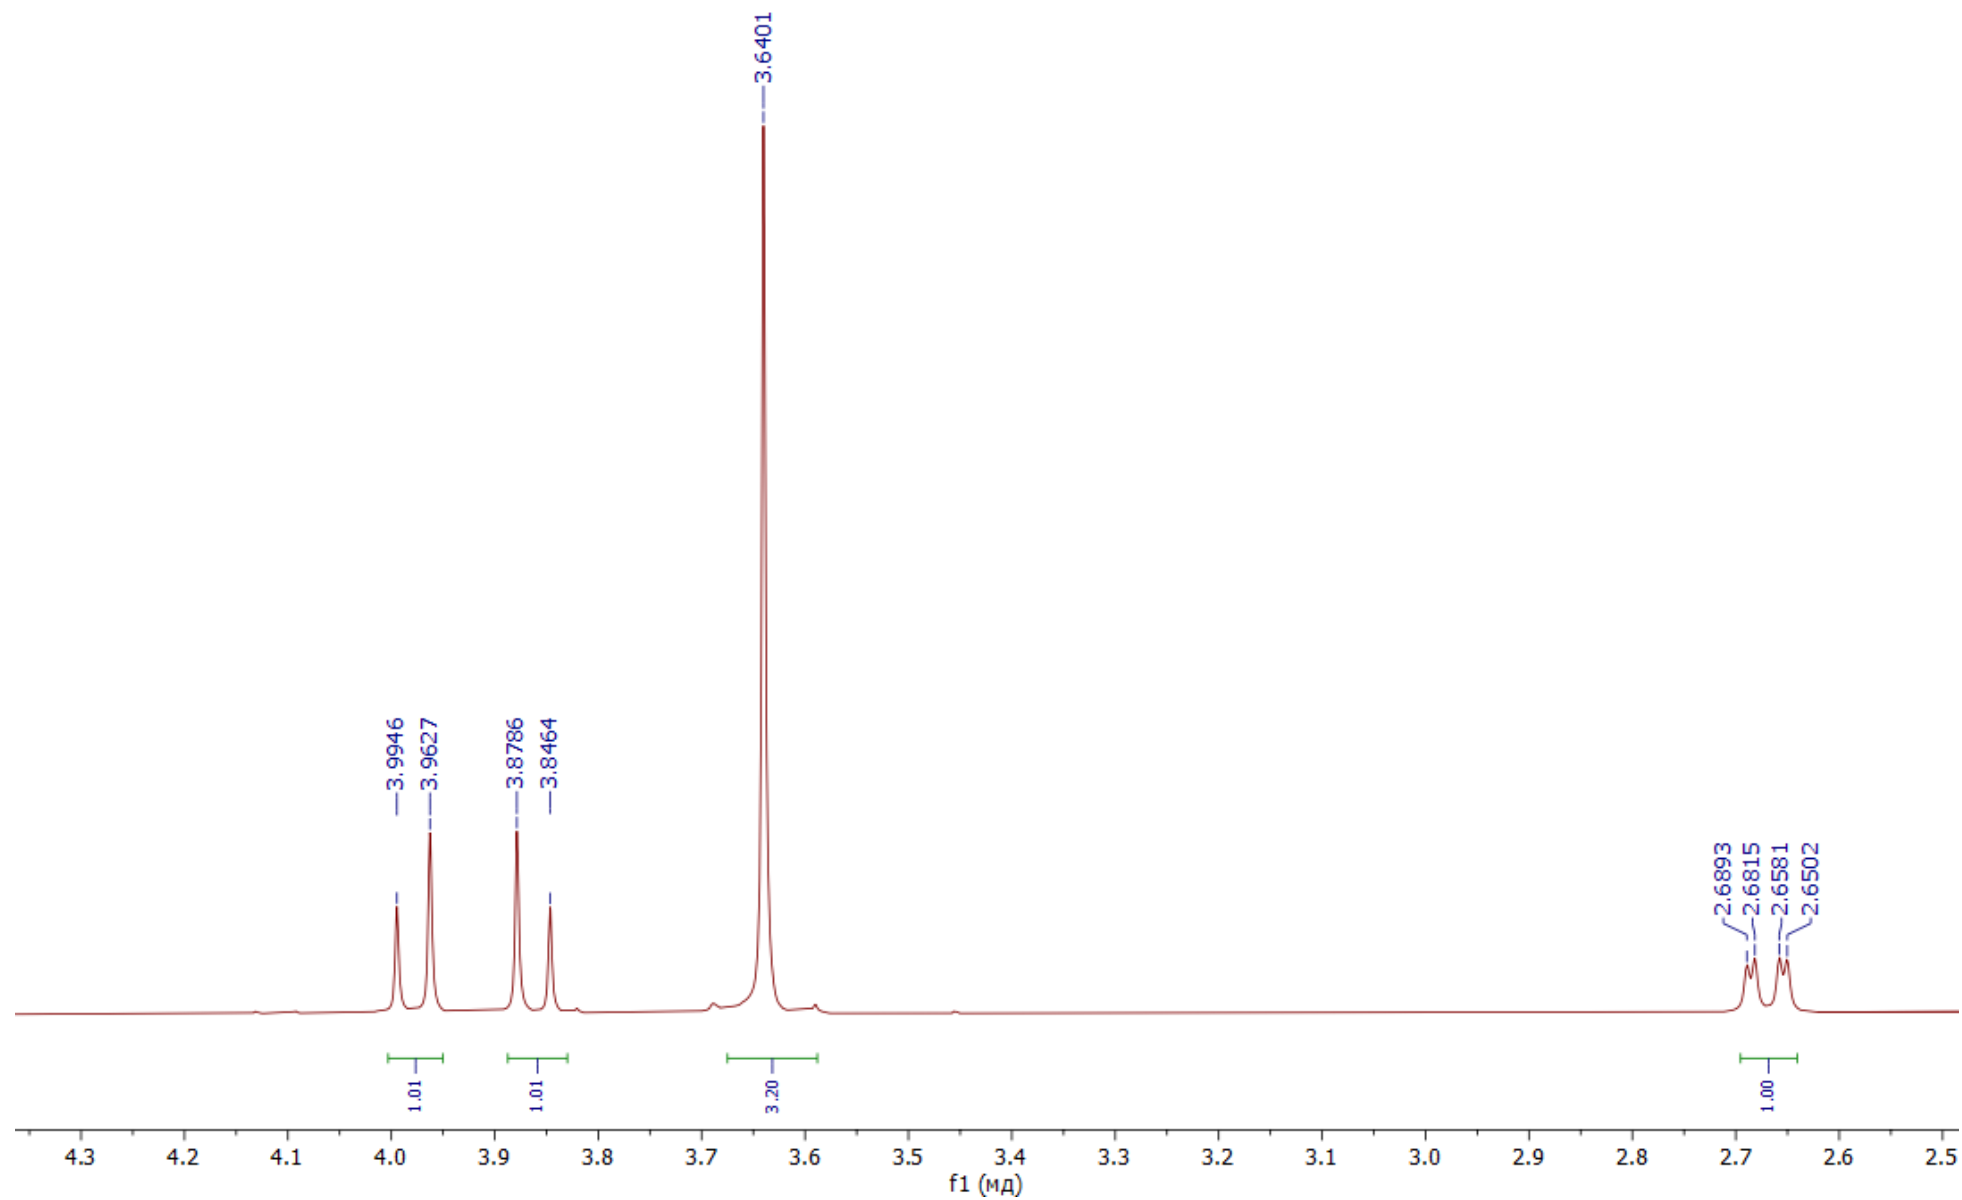

<sup>13</sup>C NMR spectra of 24-Bromo-2-cyano-4-oxo-3,4-seco-3,23-dinorlupan-28-oic acid methyl ester (30)

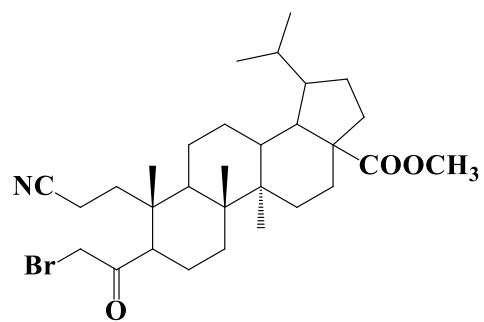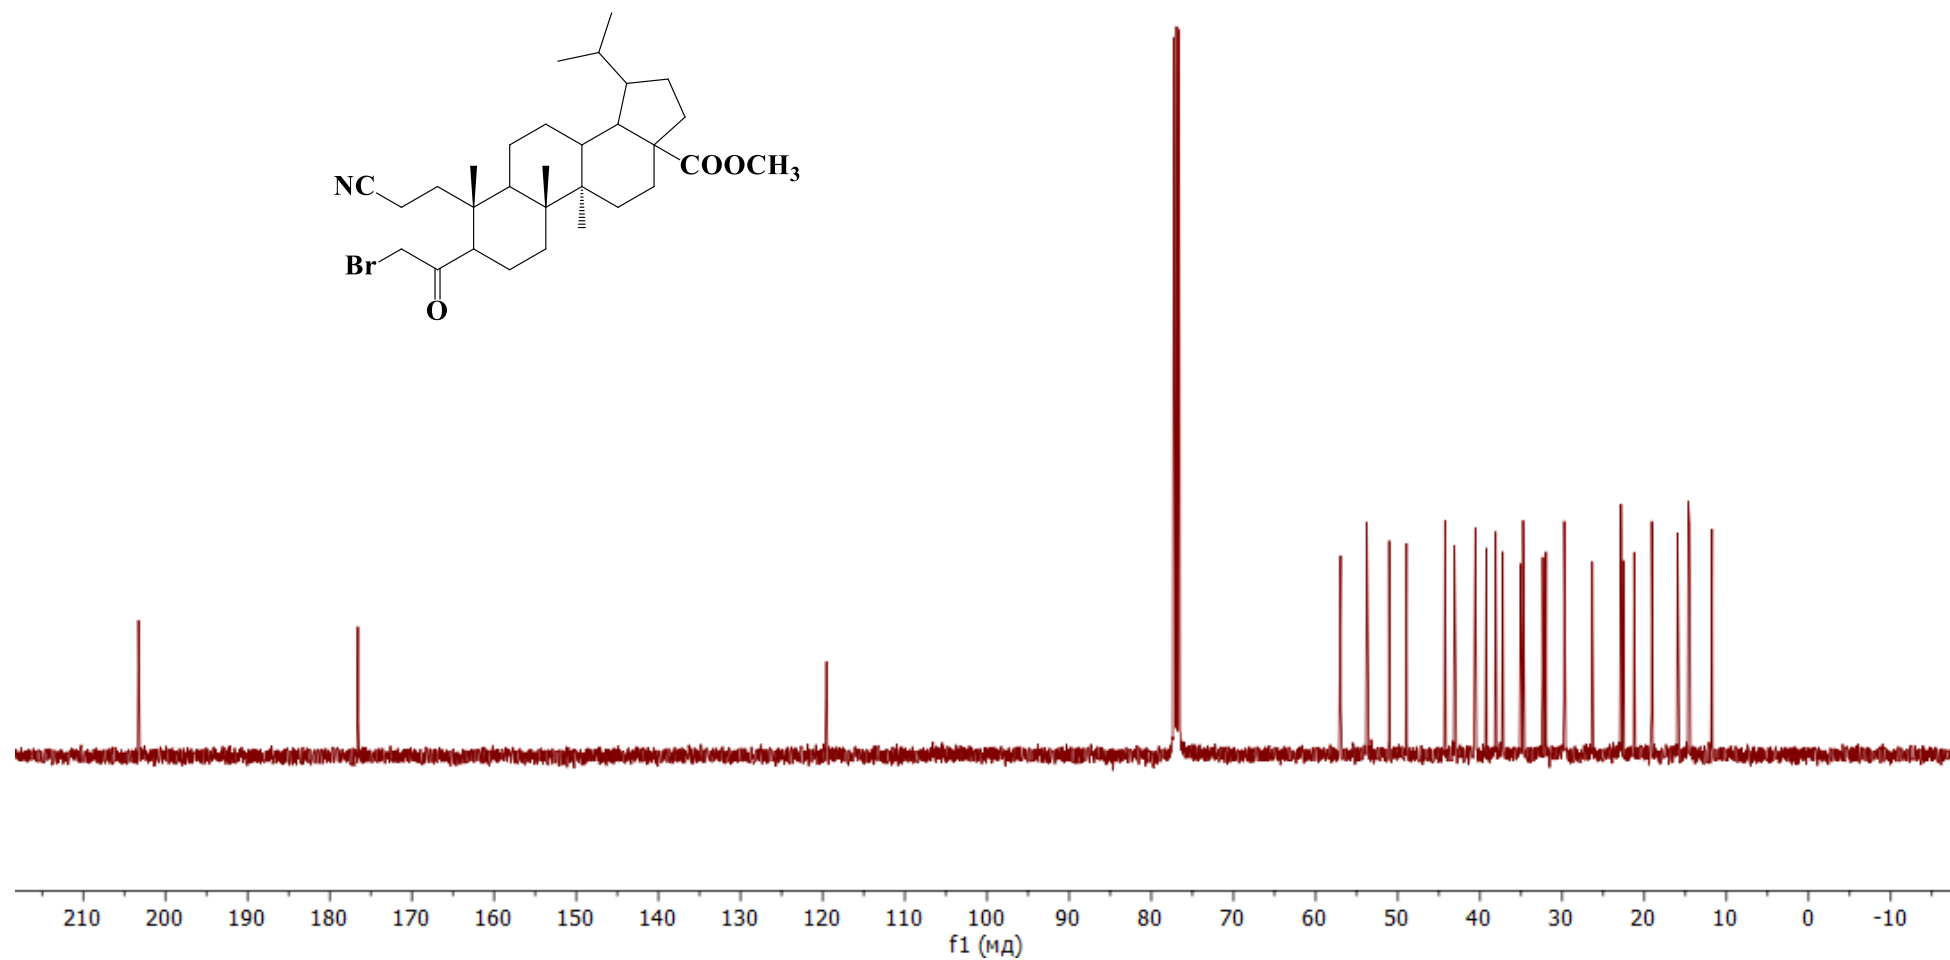



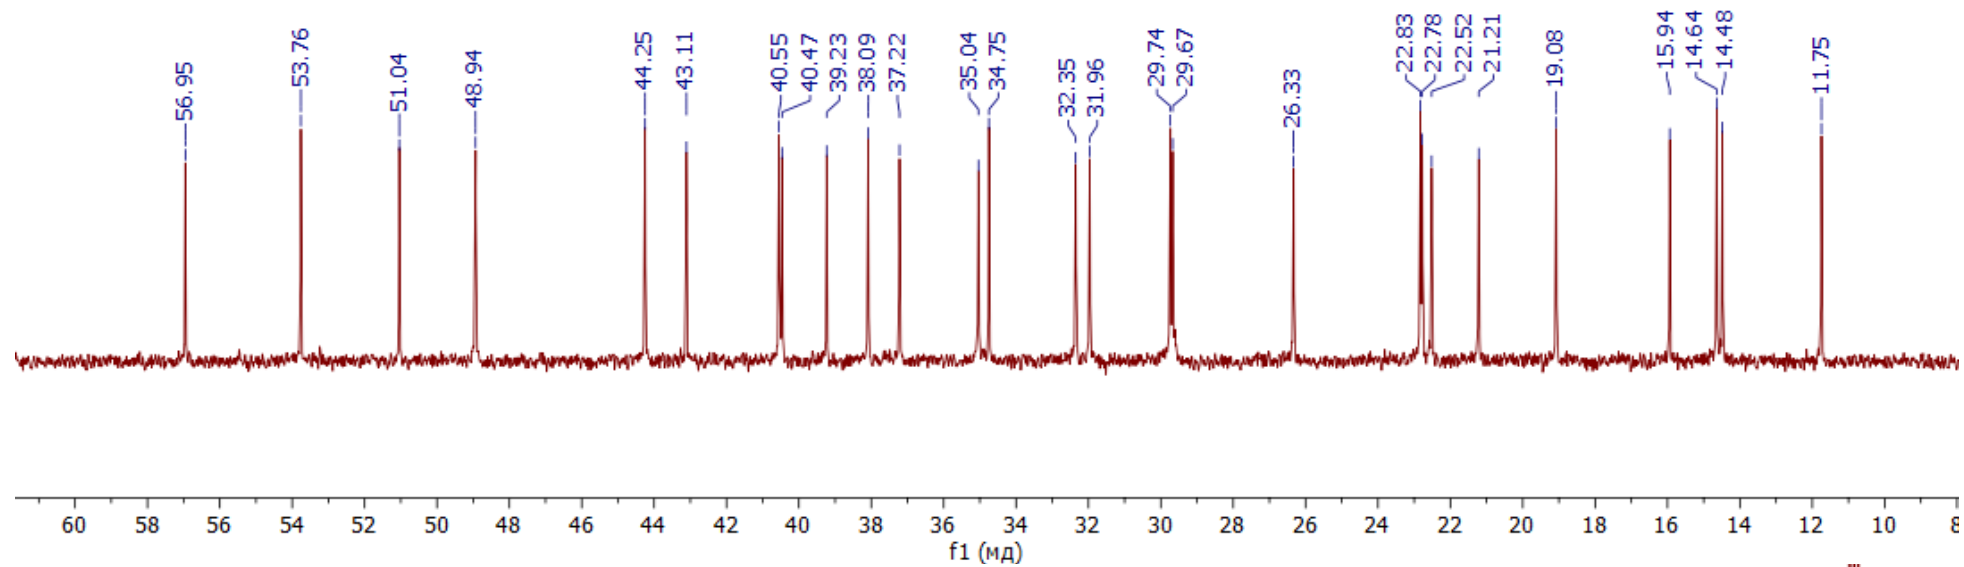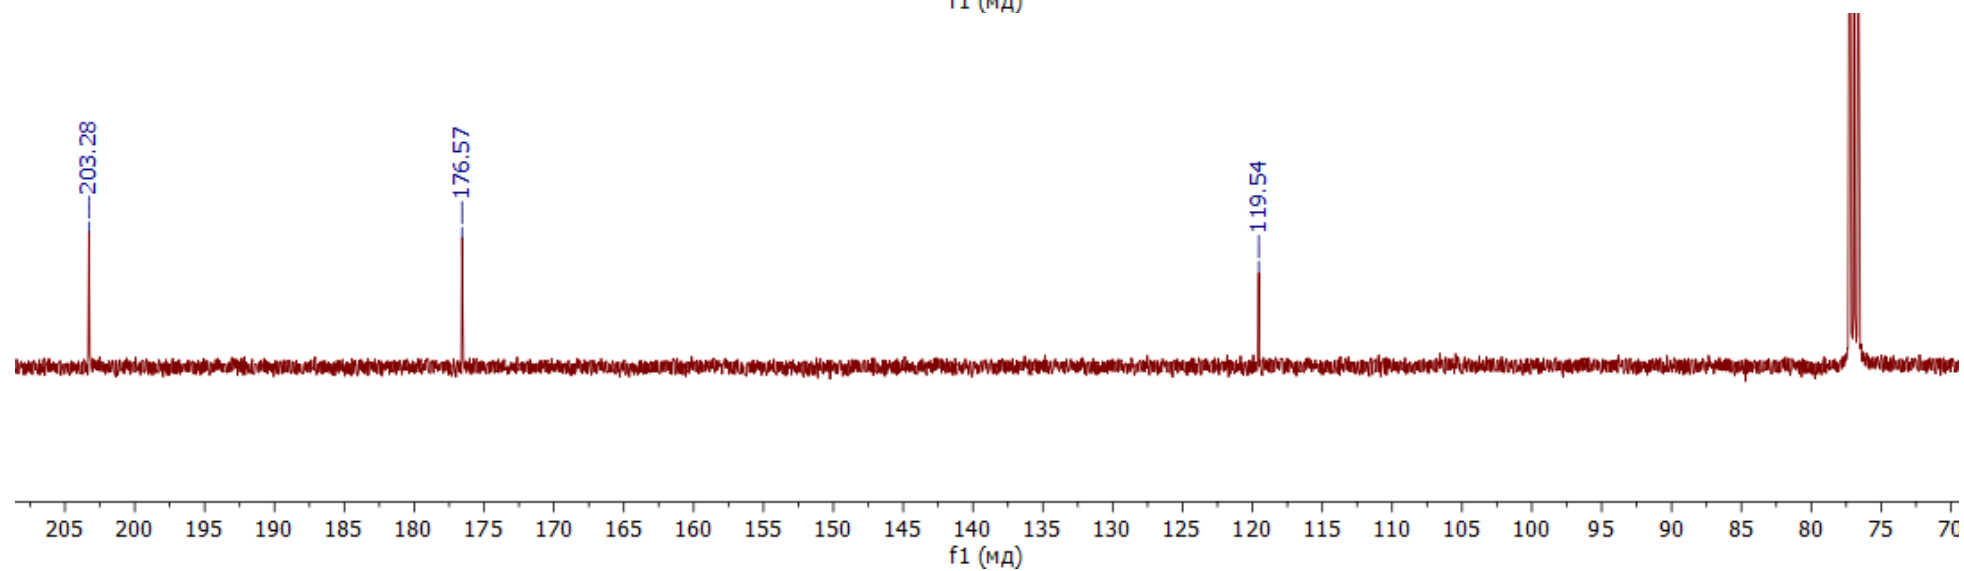

<sup>1</sup>H NMR spectra of 2-Cyano-24-dibromo-4-oxo-3,4-seco-3,23-dinorlupan-28-oic acid methyl ester (31).

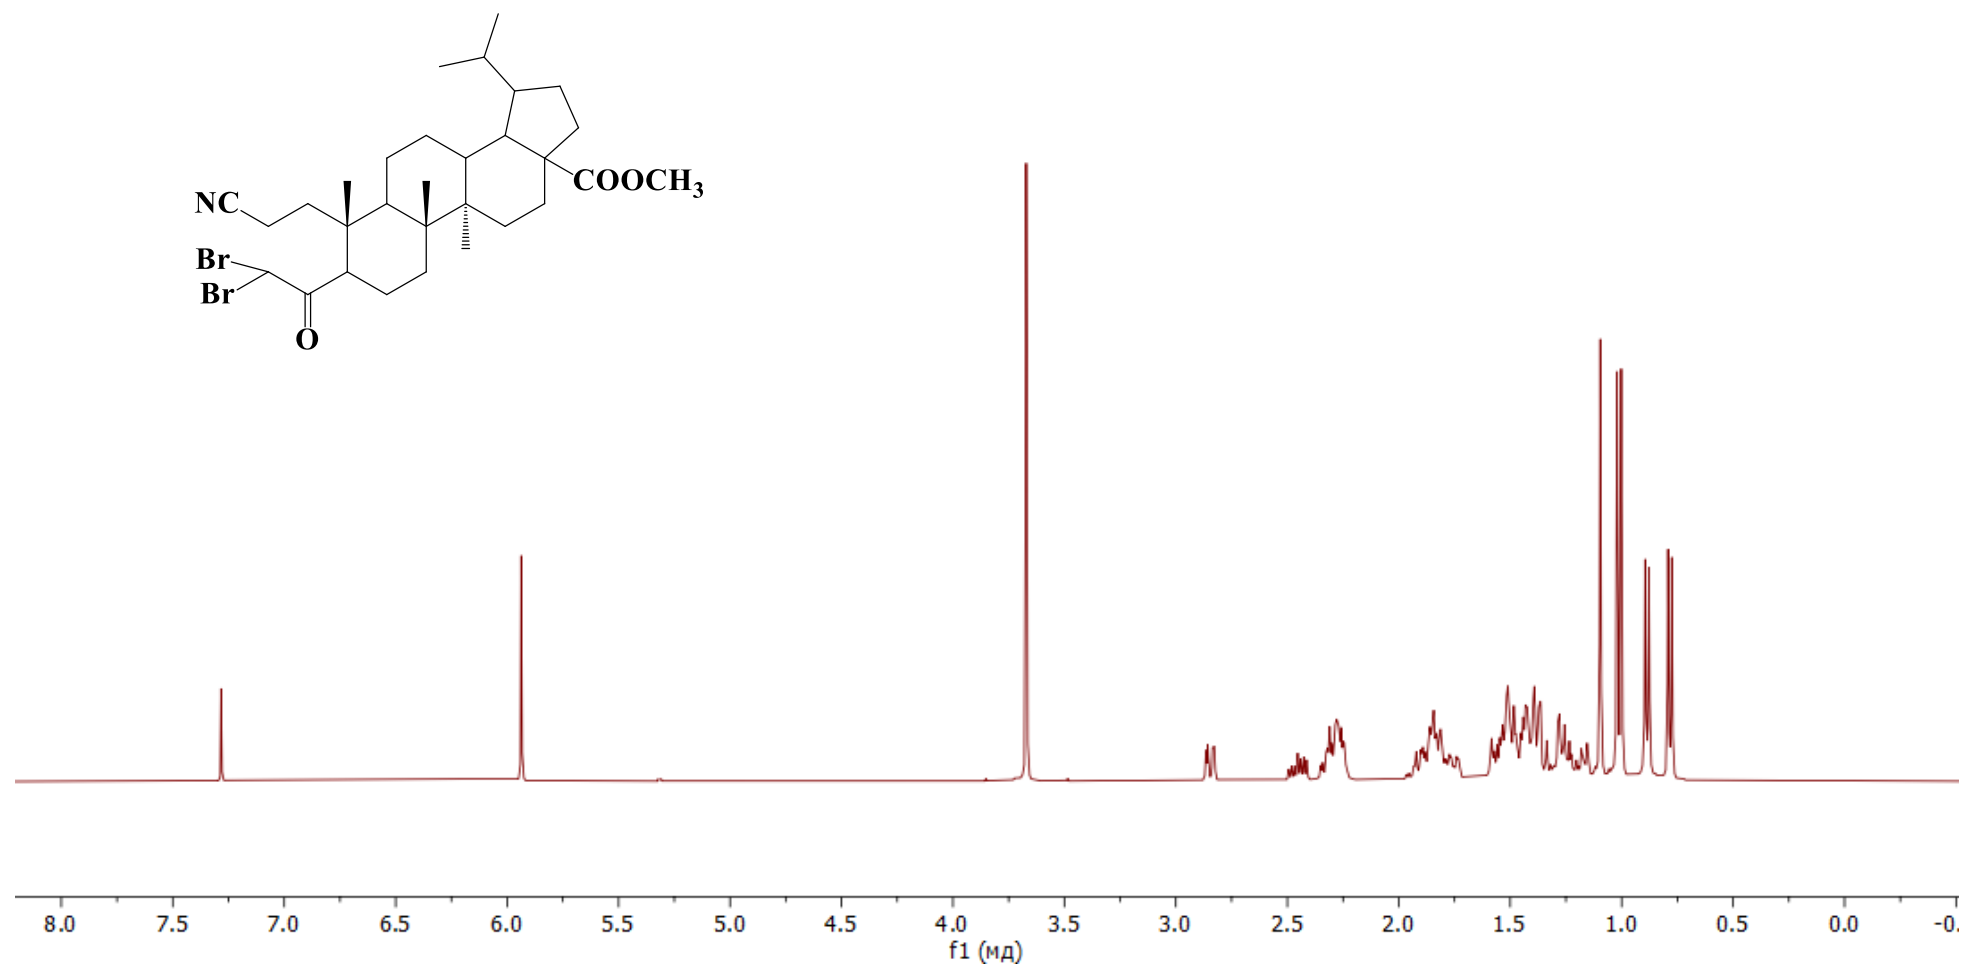

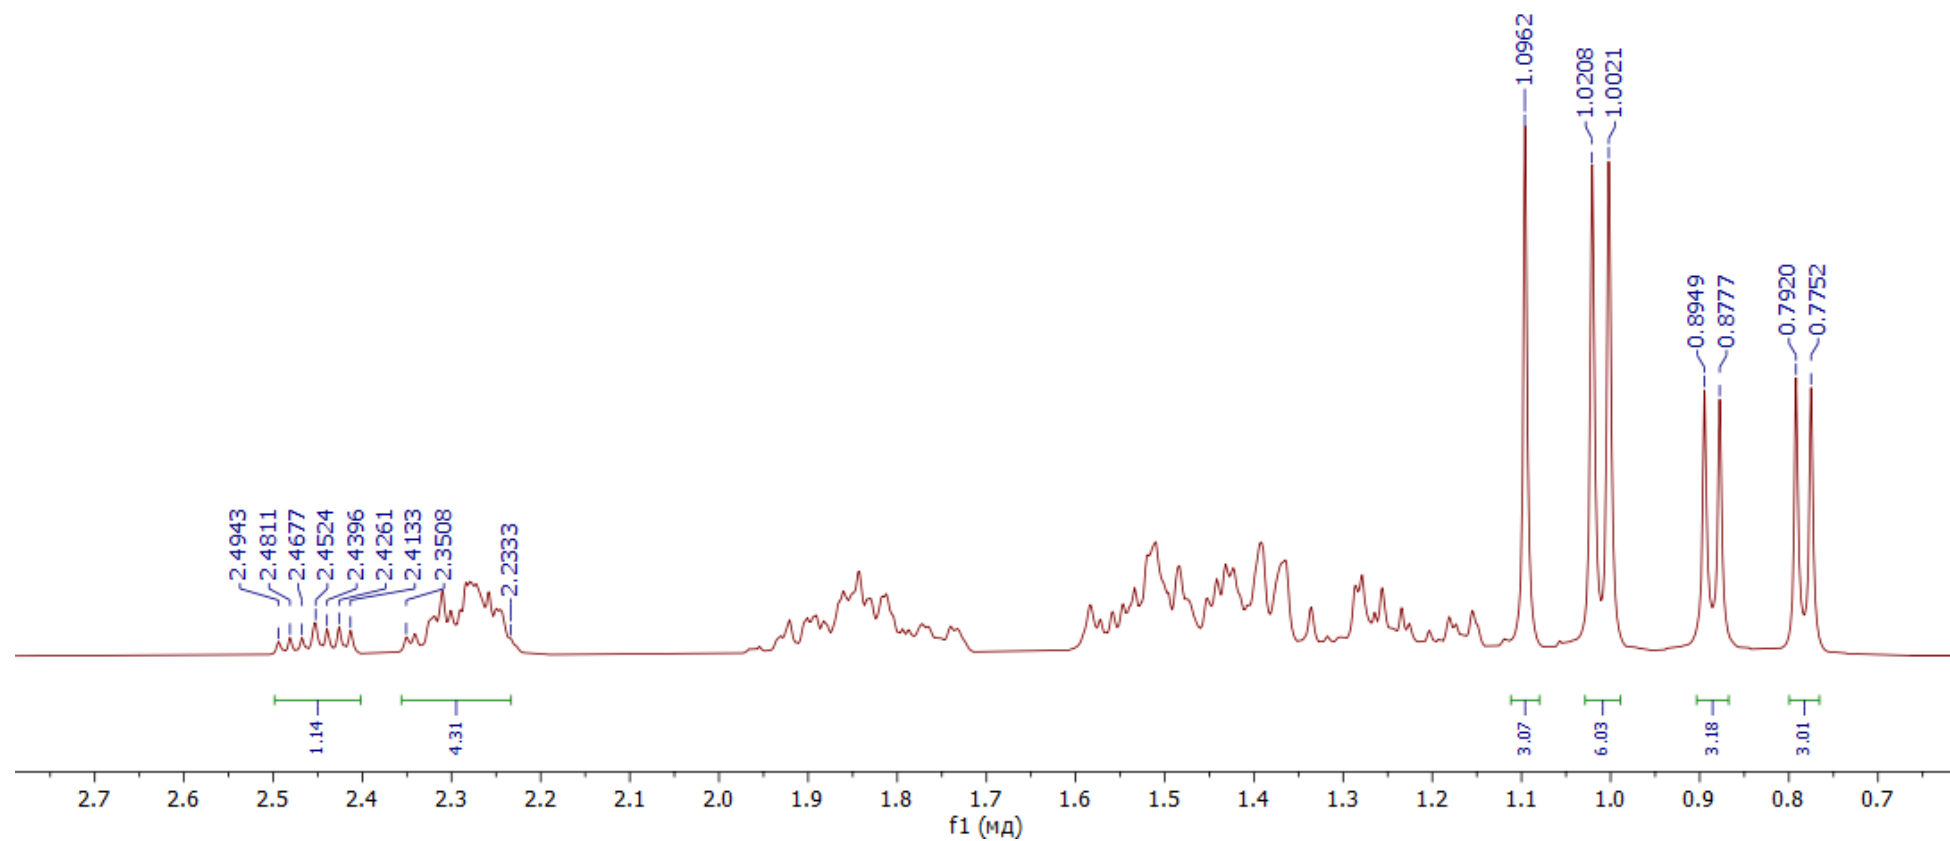

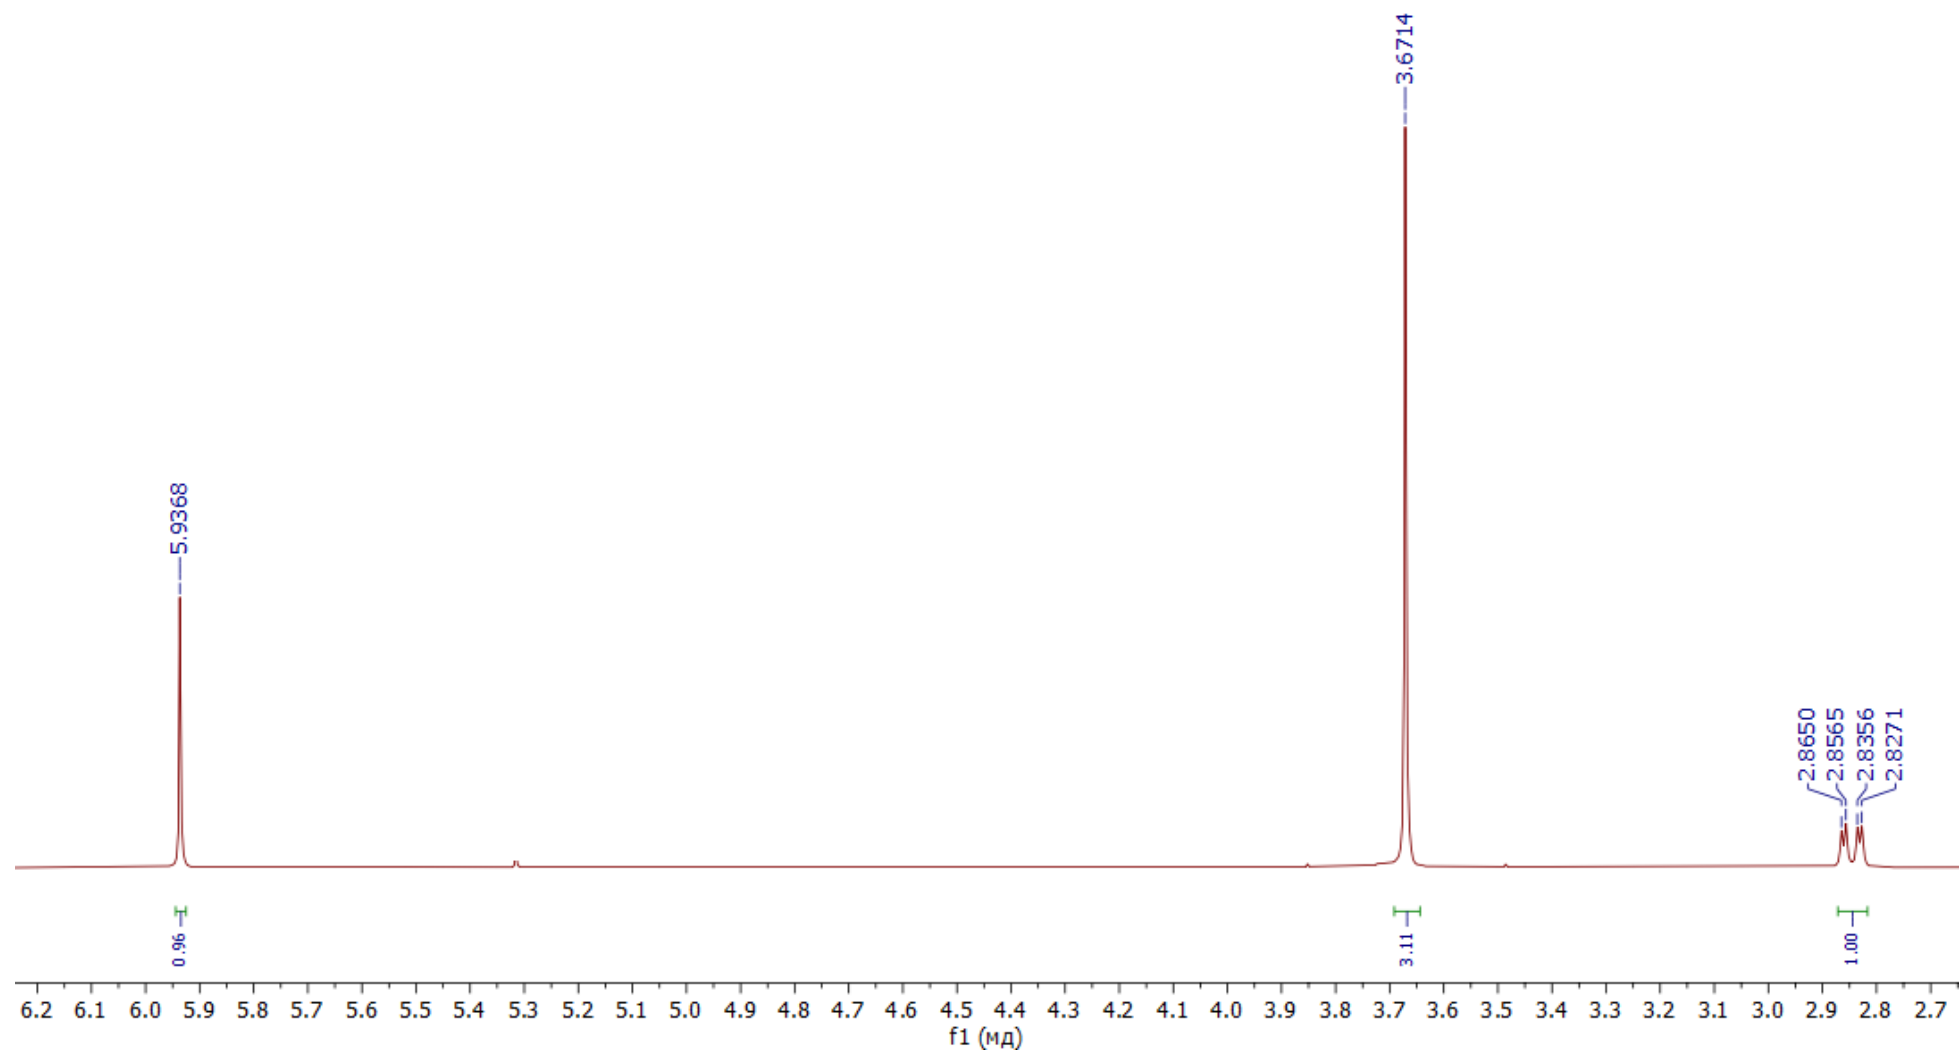

<sup>13</sup>C NMR spectra of 2-Cyano-24-dibromo-4-oxo-3,4-seco-3,23-dinorlupan-28-oic acid methyl ester (31).

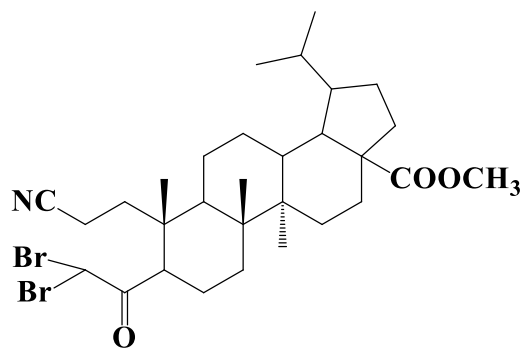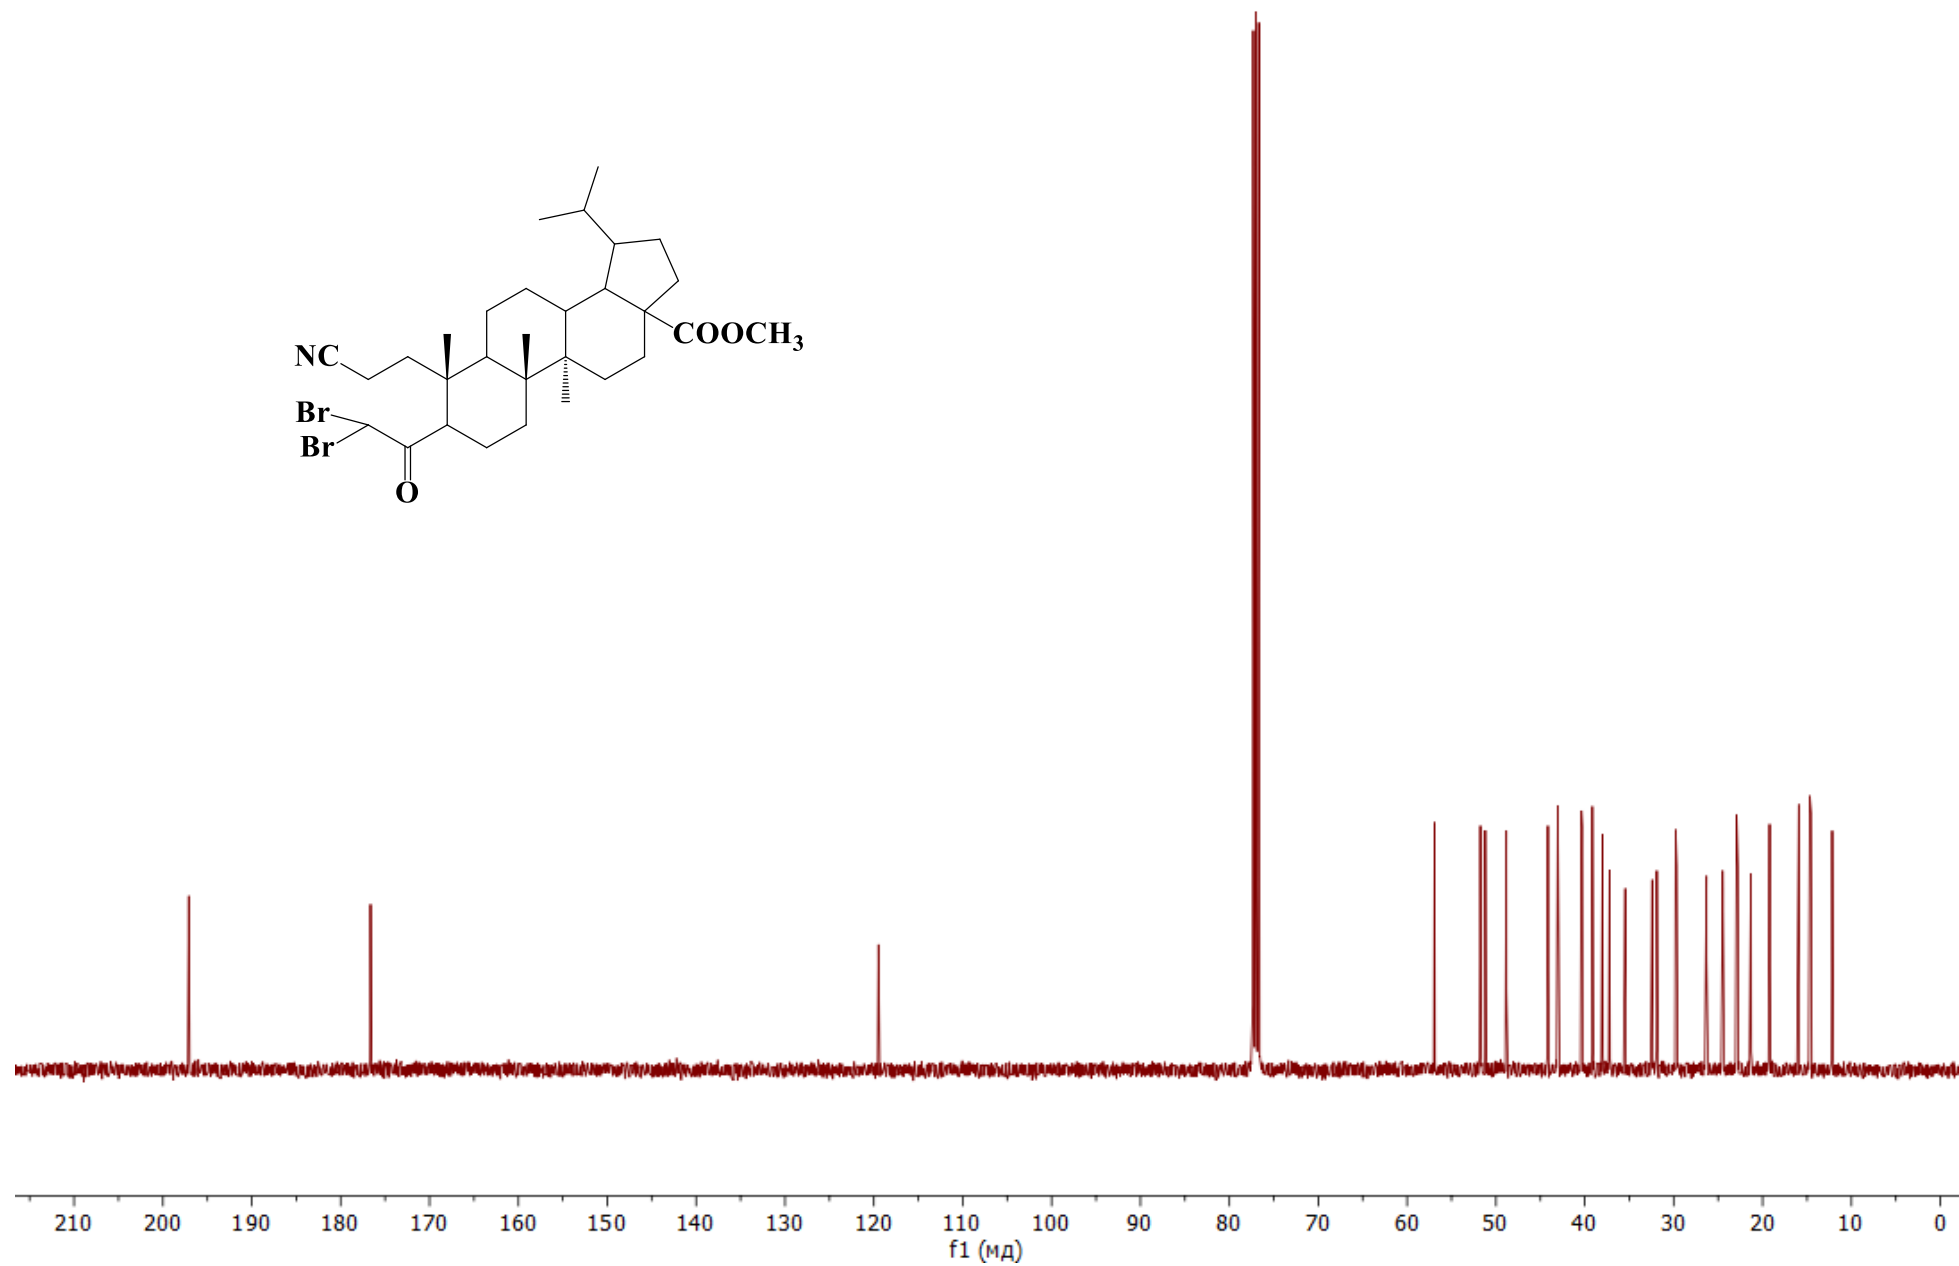

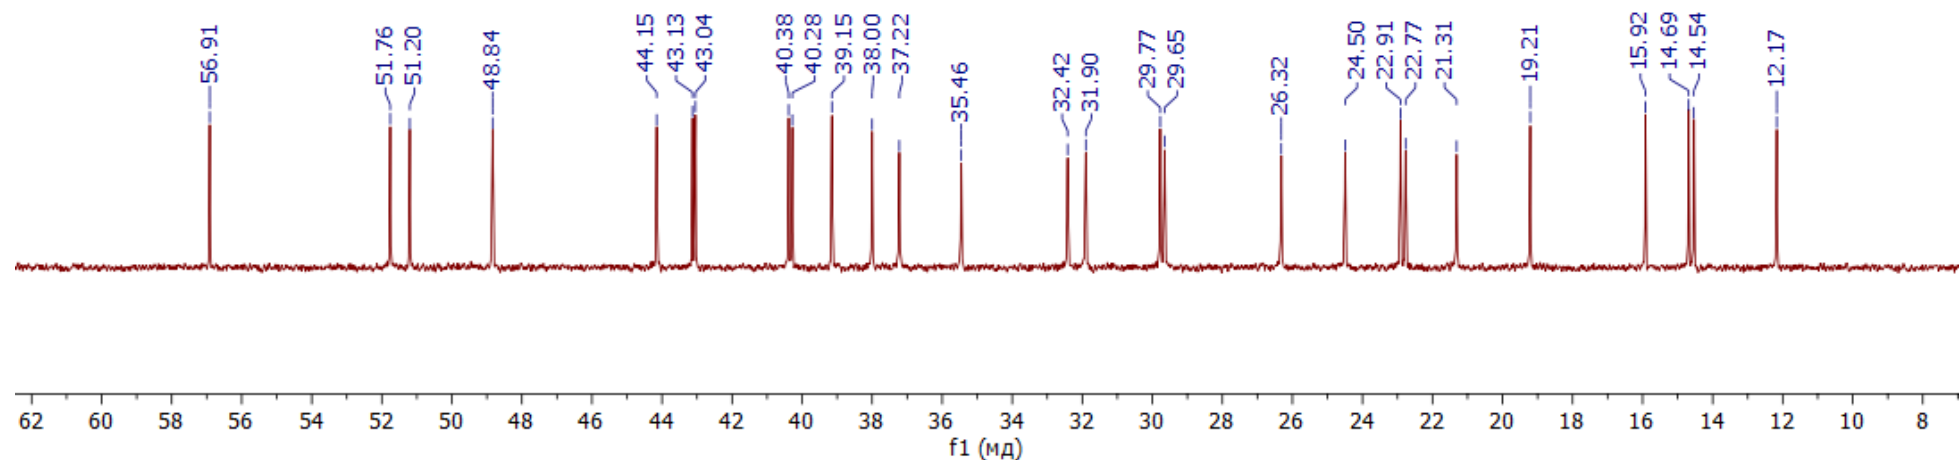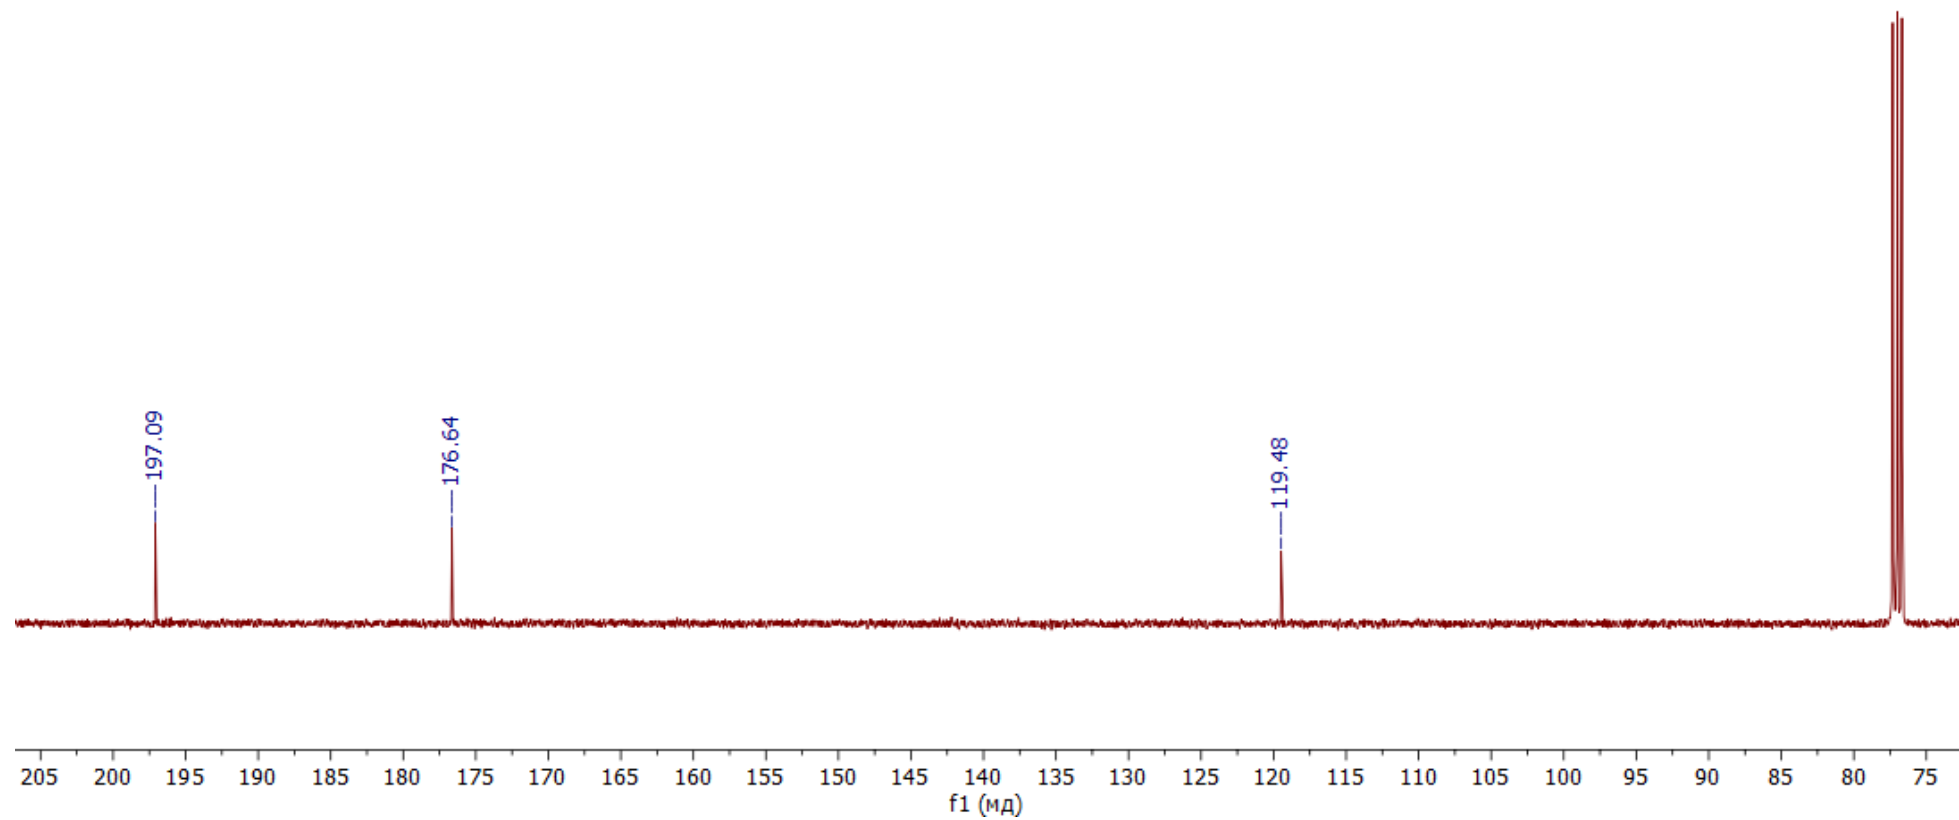

<sup>1</sup>H NMR spectra of 2-Cyano-4-oxo-24-tribromo-3,23-dinorlupan-28-oic acid methyl ester (32).

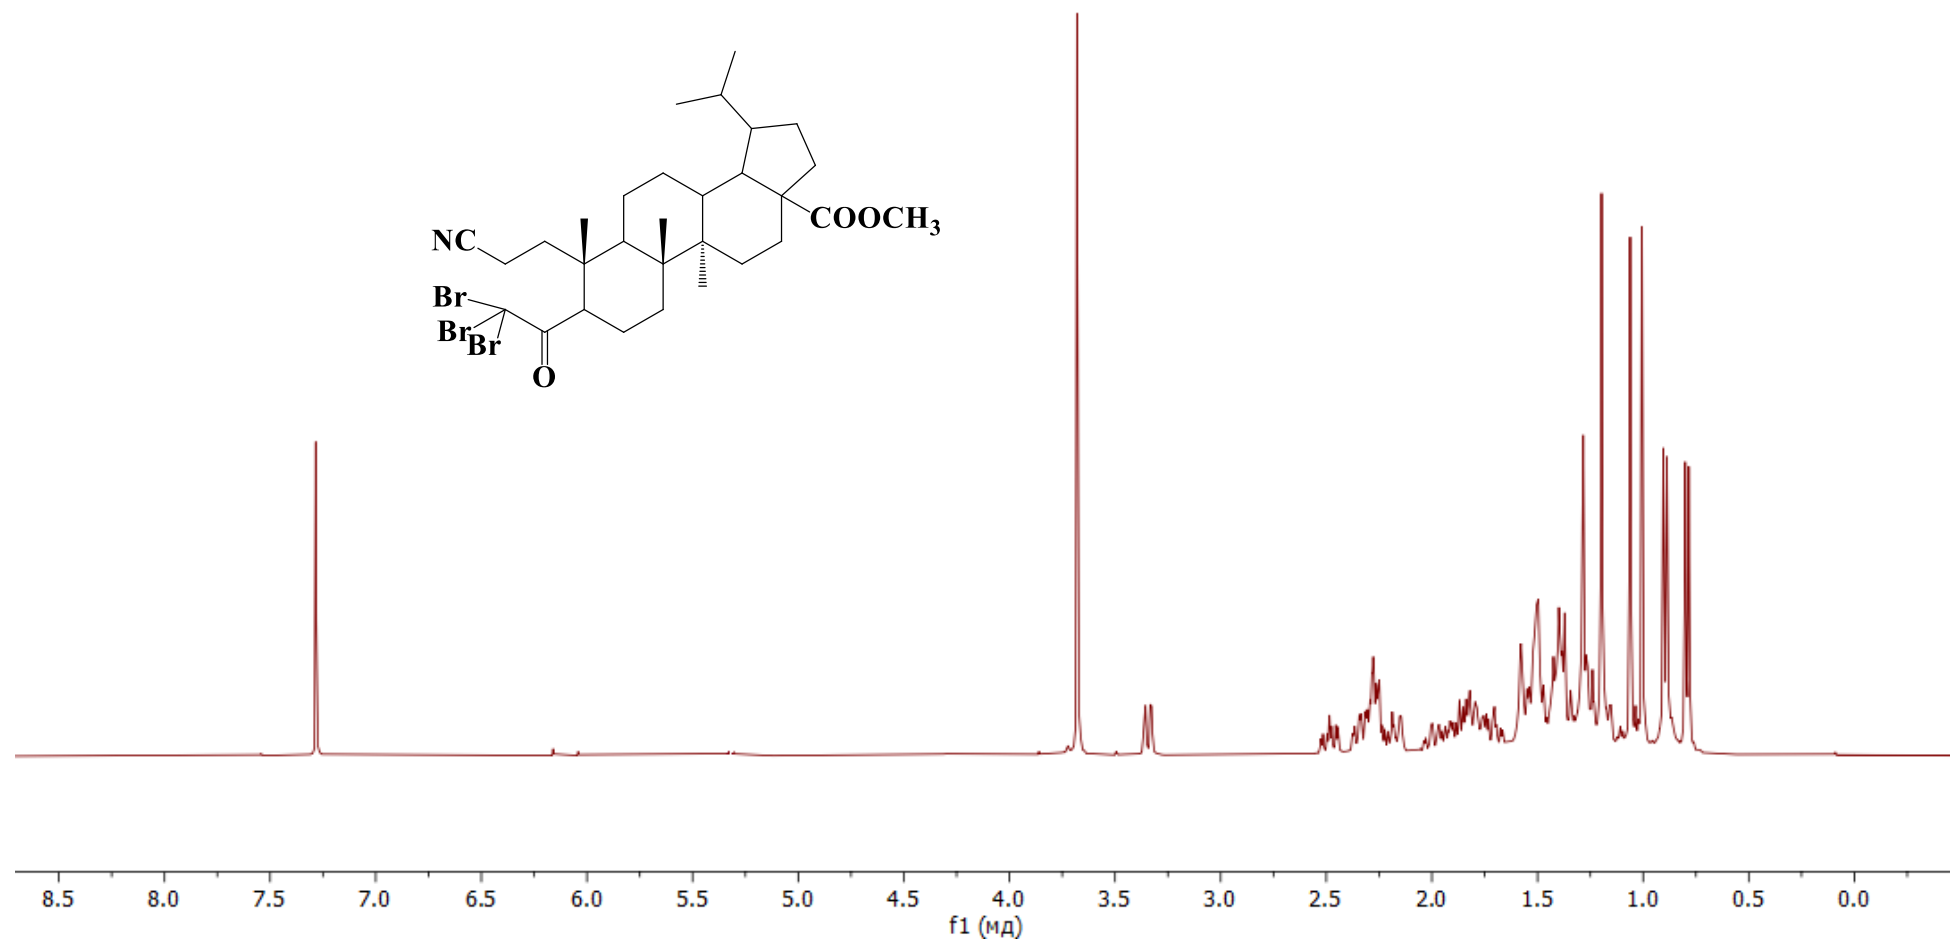

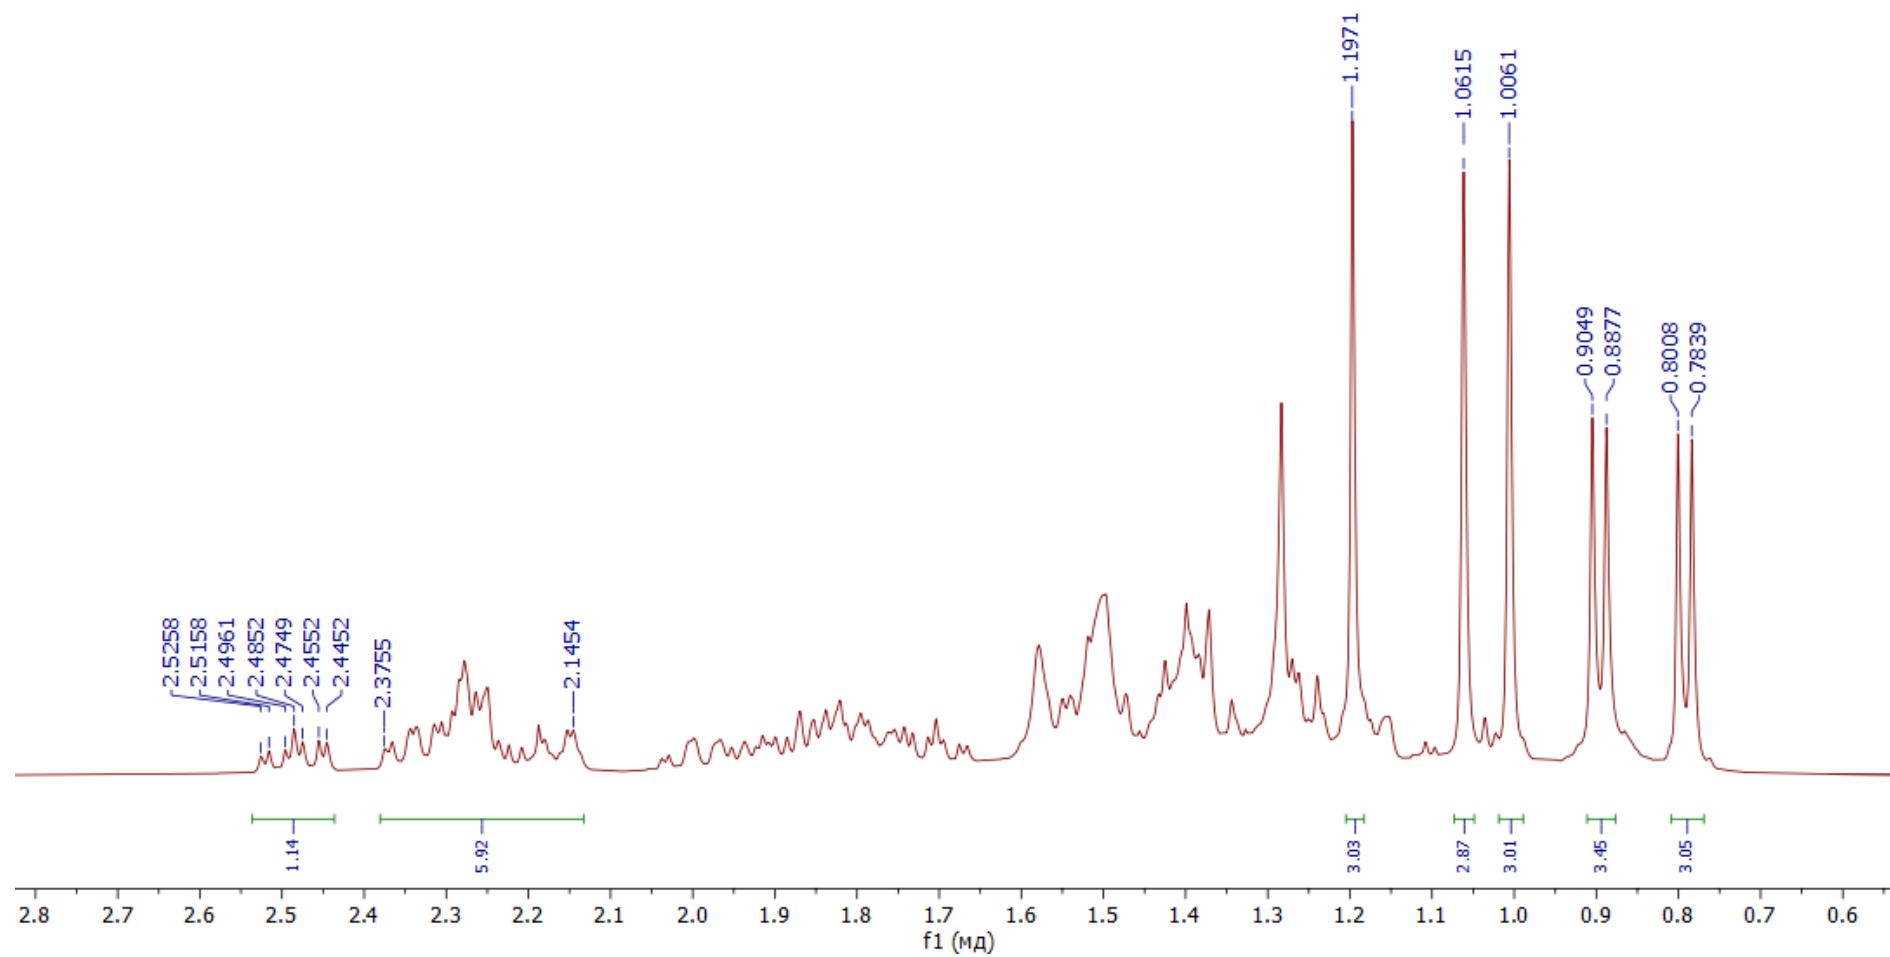



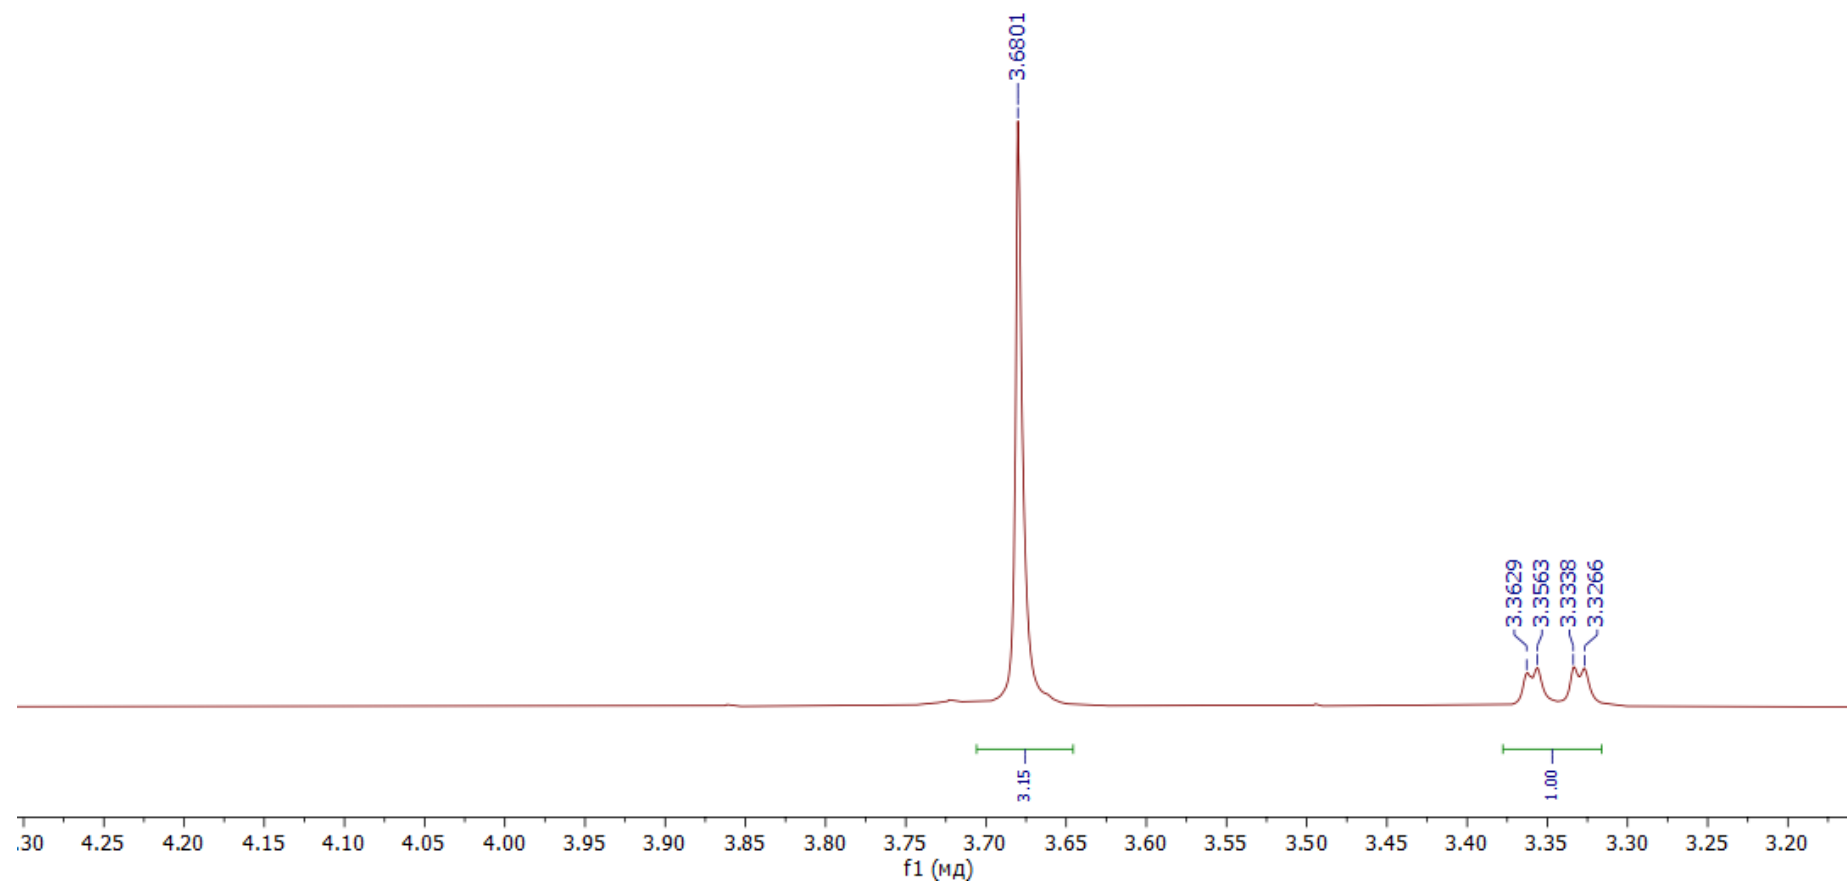

$^{13}\text{C}$  NMR spectra of 2-Cyano-4-oxo-24-tribromo-3,23-dinorlupan-28-oic acid methyl ester (32).

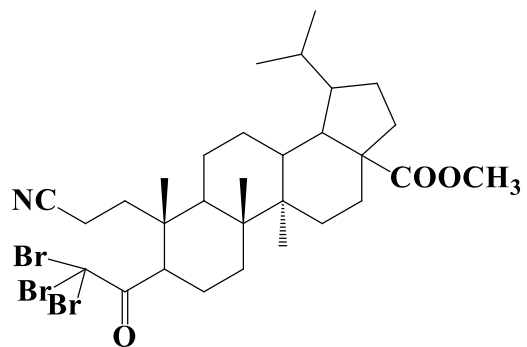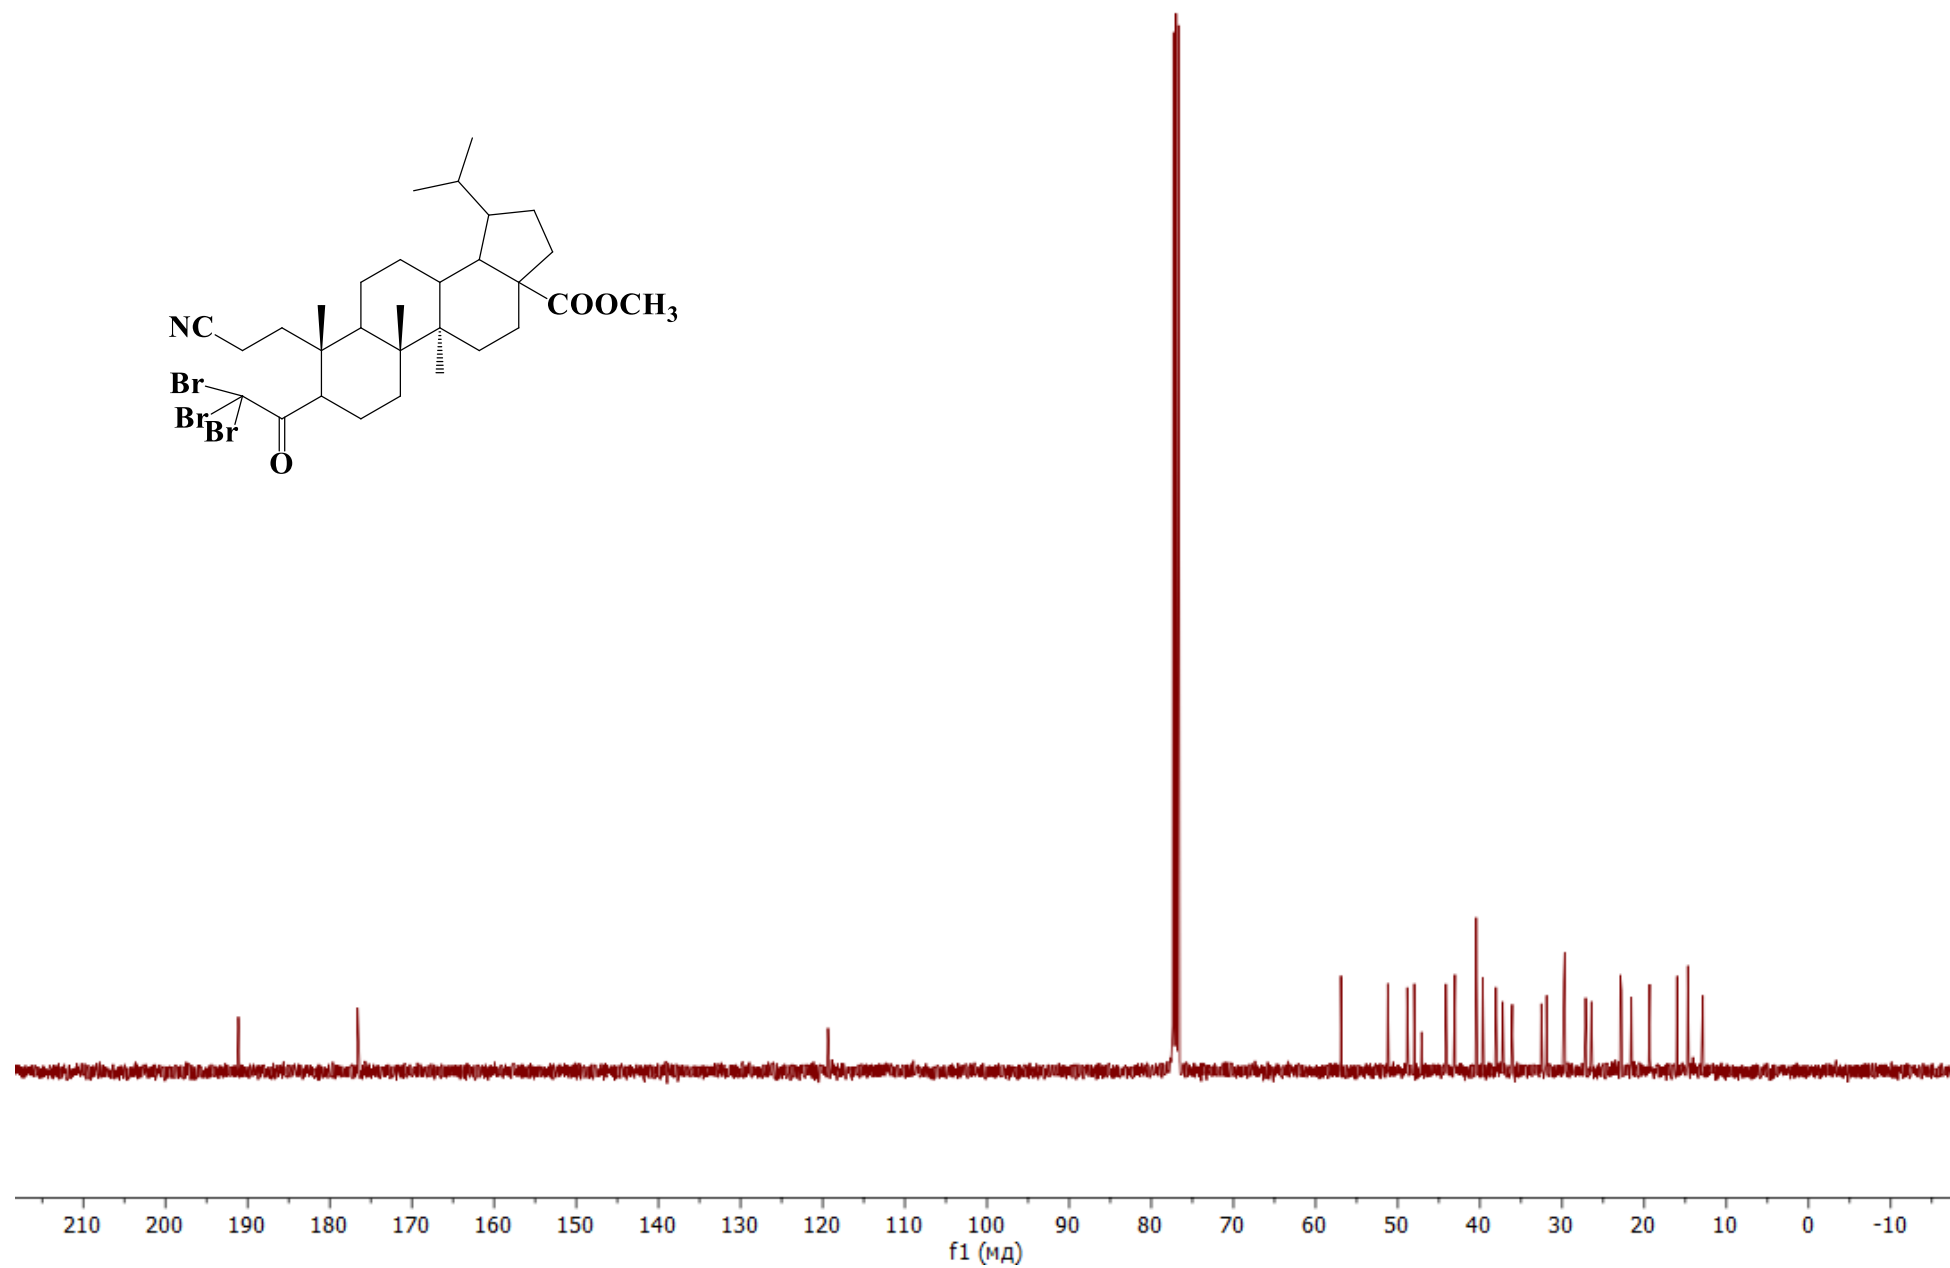

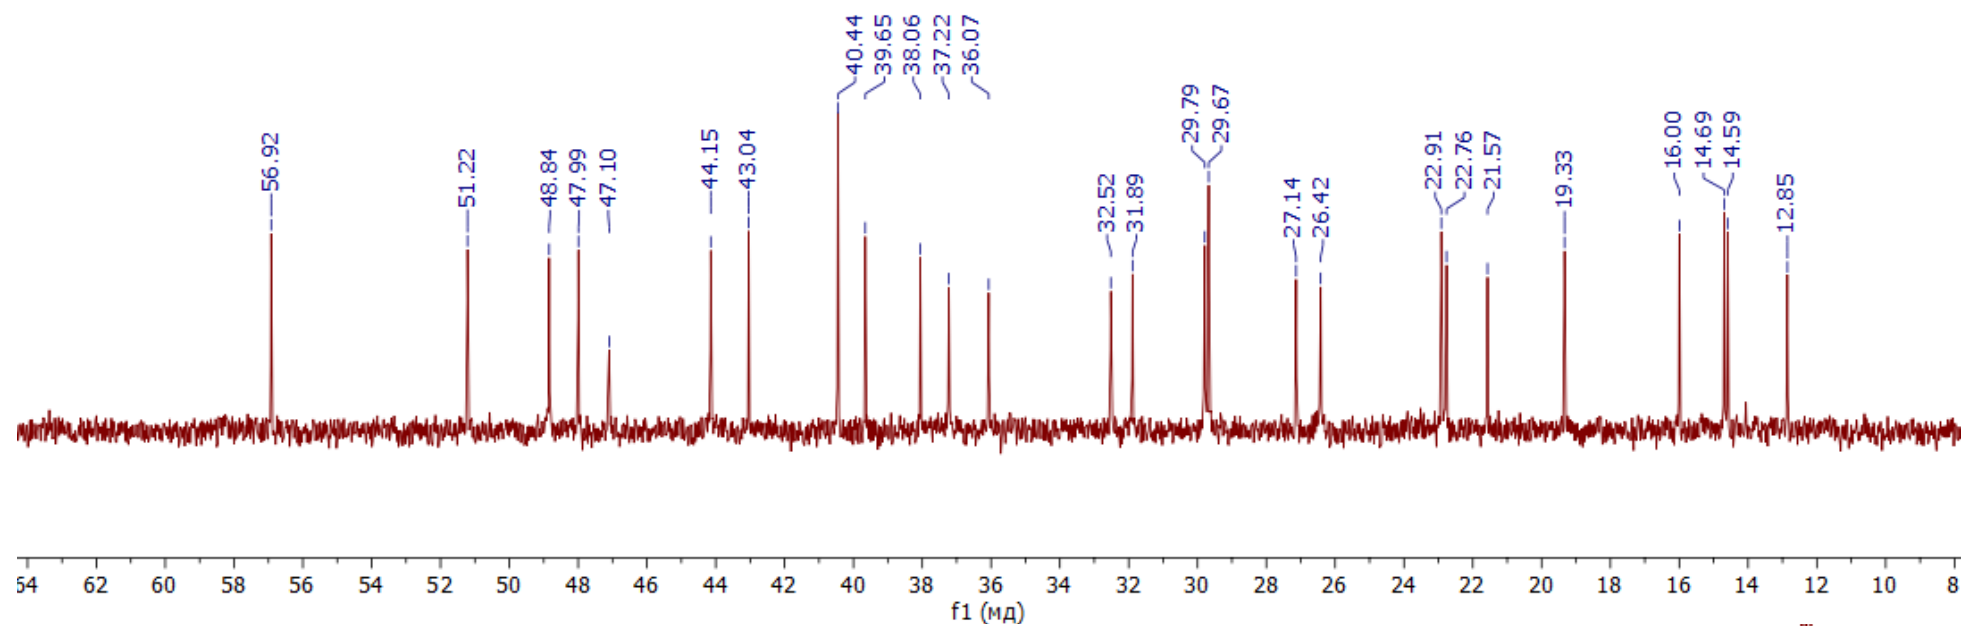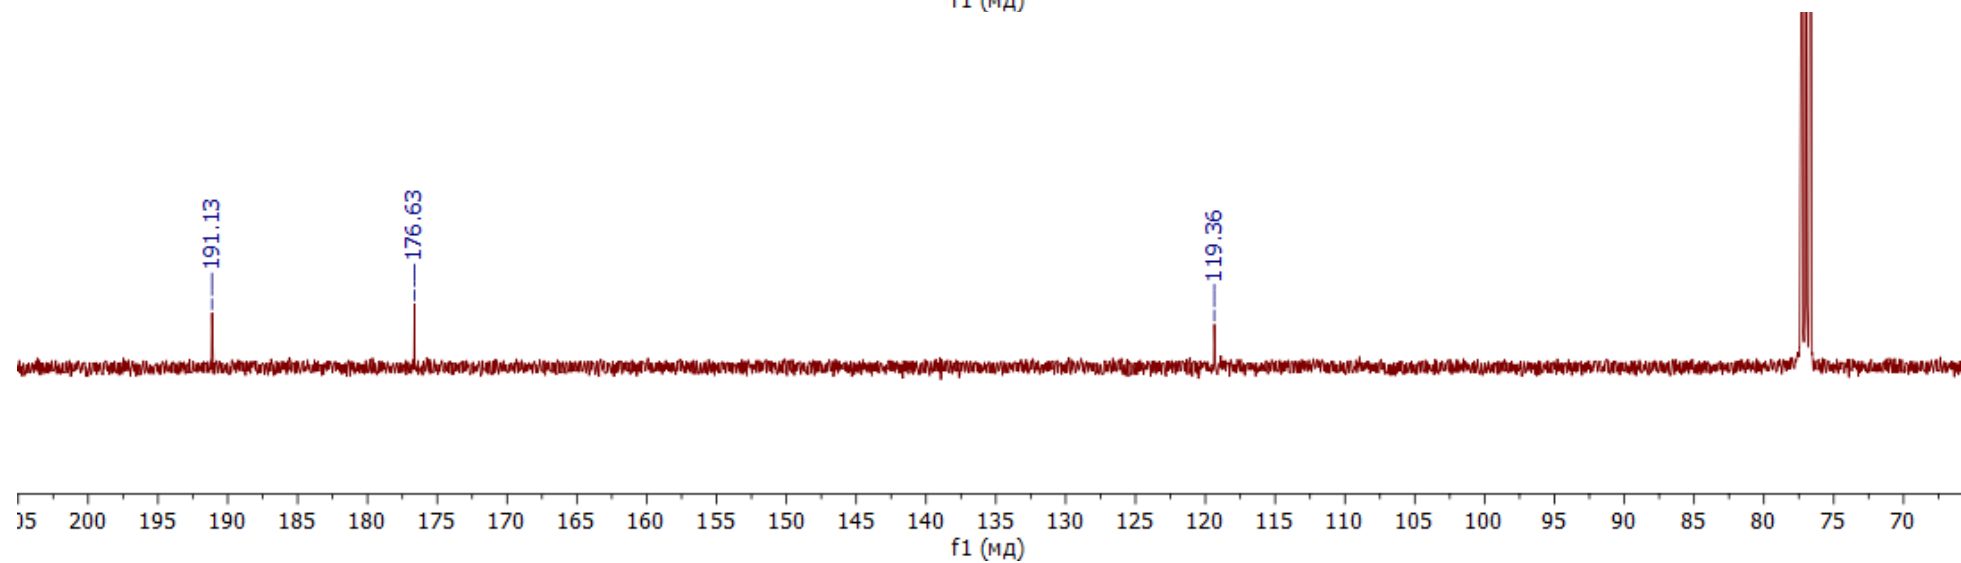

Mass spectra (MS).

28-Benzoyloxy-2-cyano-3,4-seco-3-norlup-4(23)-en-24-al (4).

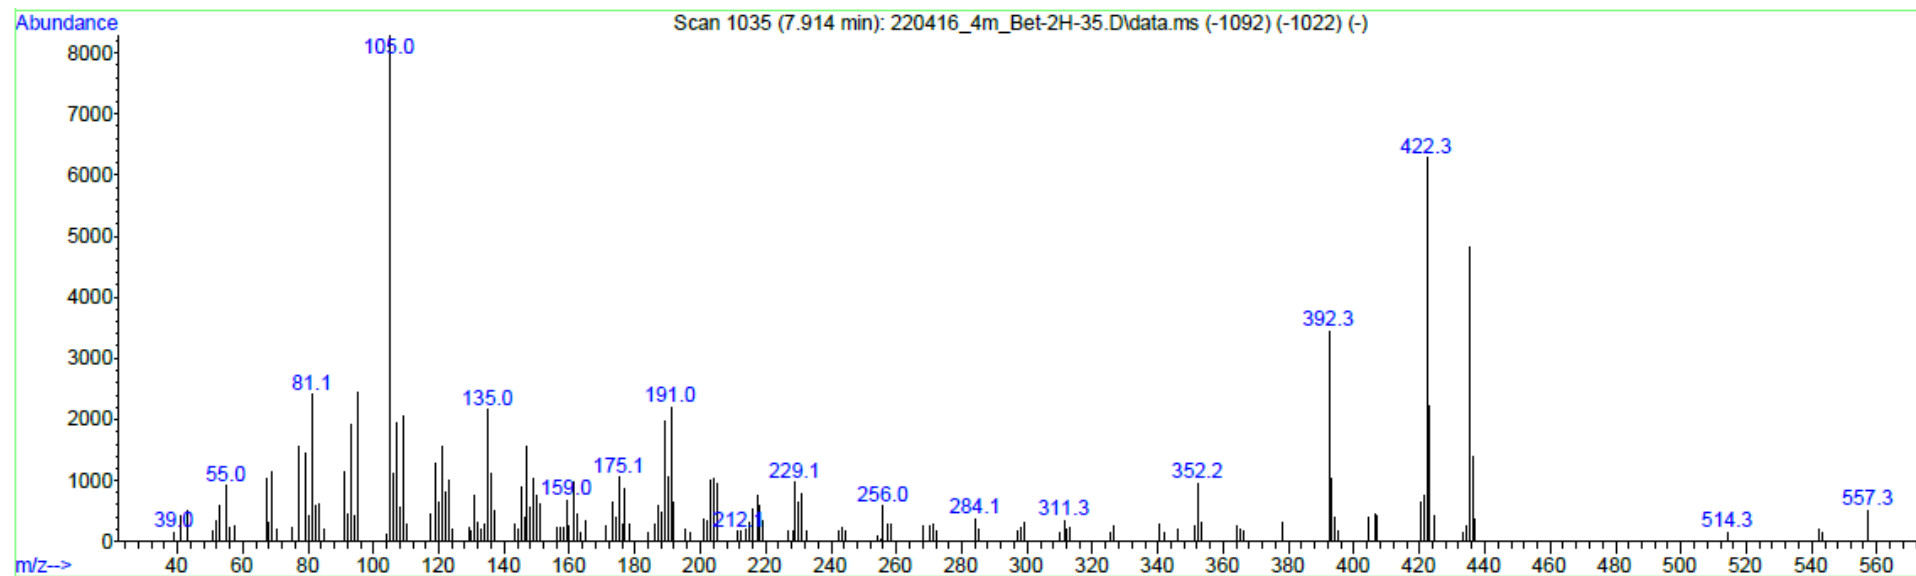

2-Cyano-3,4-seco-3-norlup-4(23)-en-24-al-28-oic acid methyl ester (5).

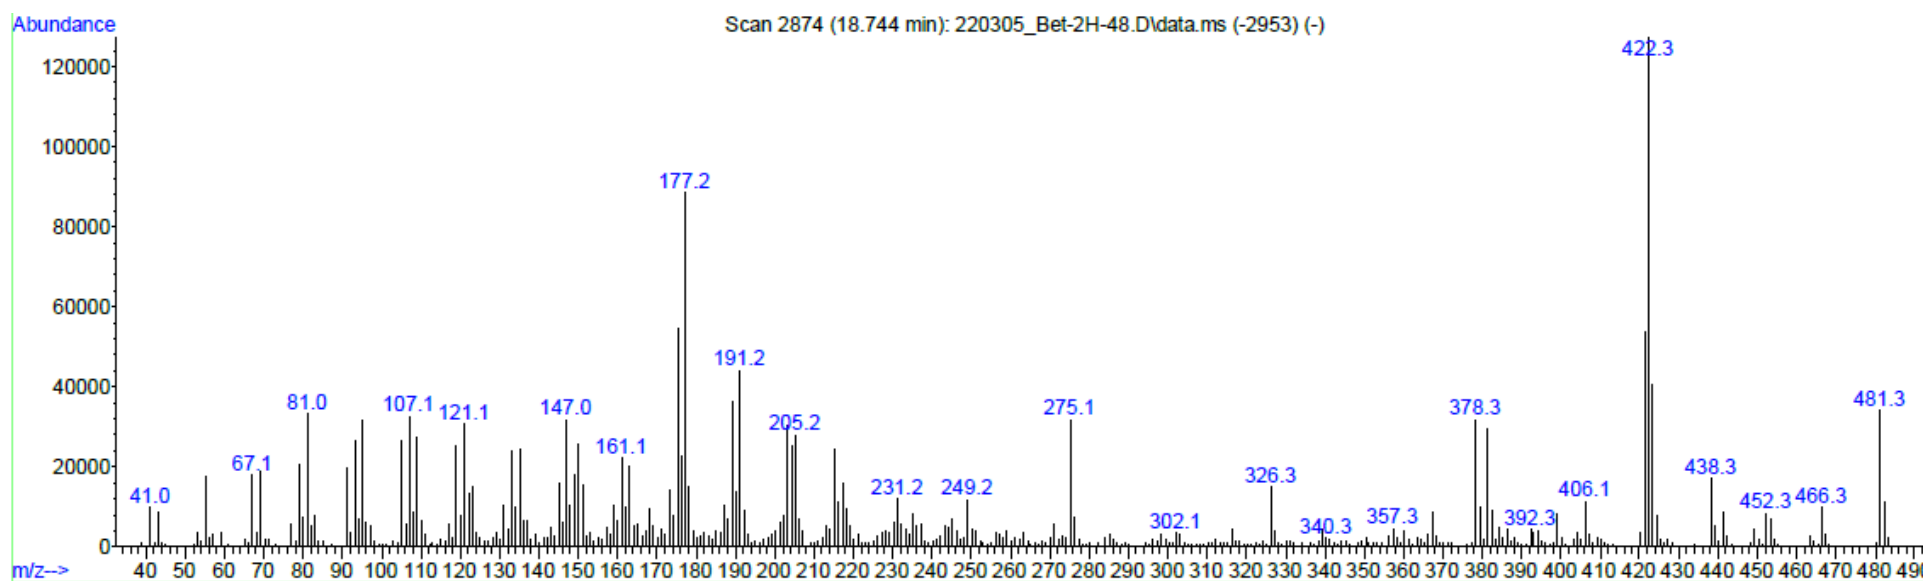

28-Benzoxy-24-bromo-2-cyano-3,4-seco-3-norlup-4(23)-ene (6).

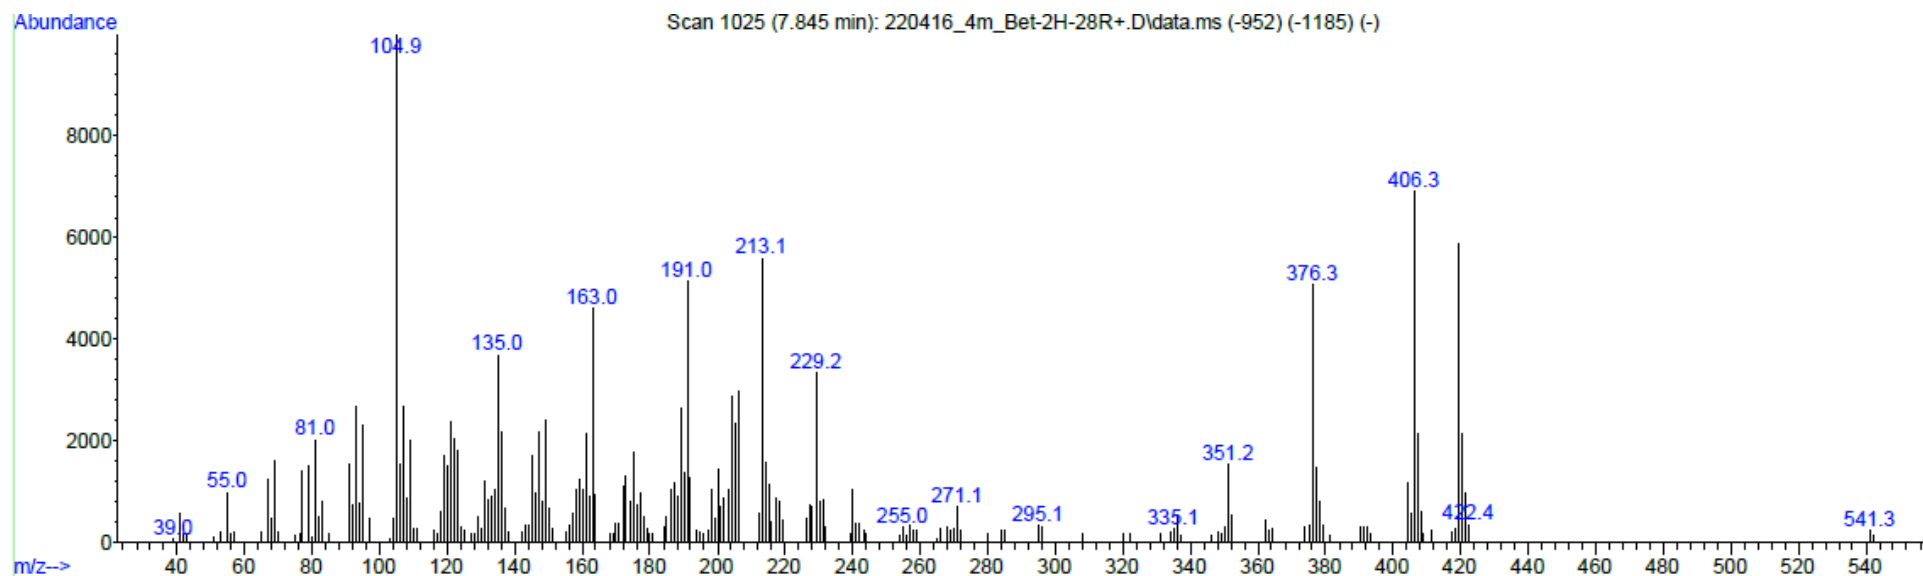

24-Bromo-2-cyano-3-norlup-4(23)-en-28-oic acid methyl ester (7).

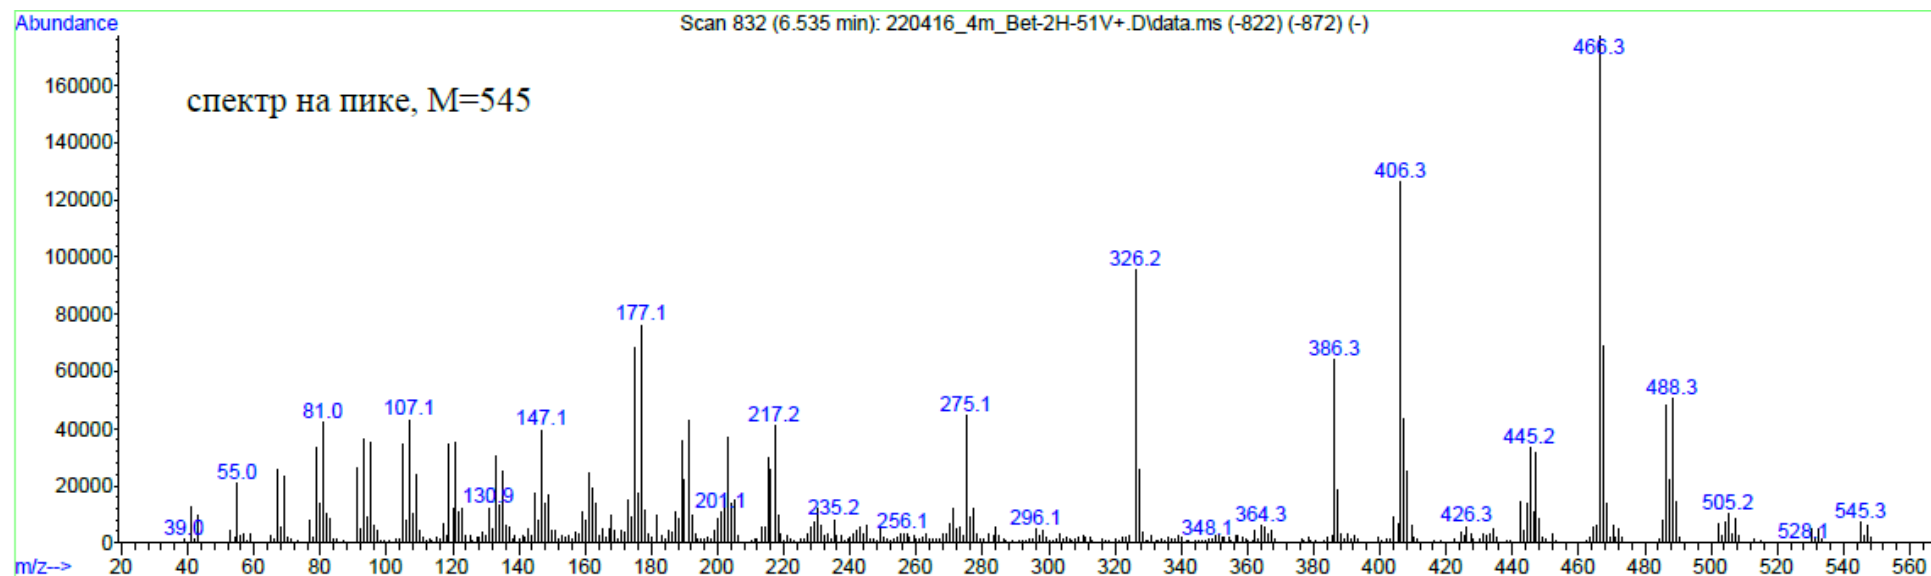

2-Cyano-28-hydroxy-3-norlup-2(24),4(23)-diene (8).

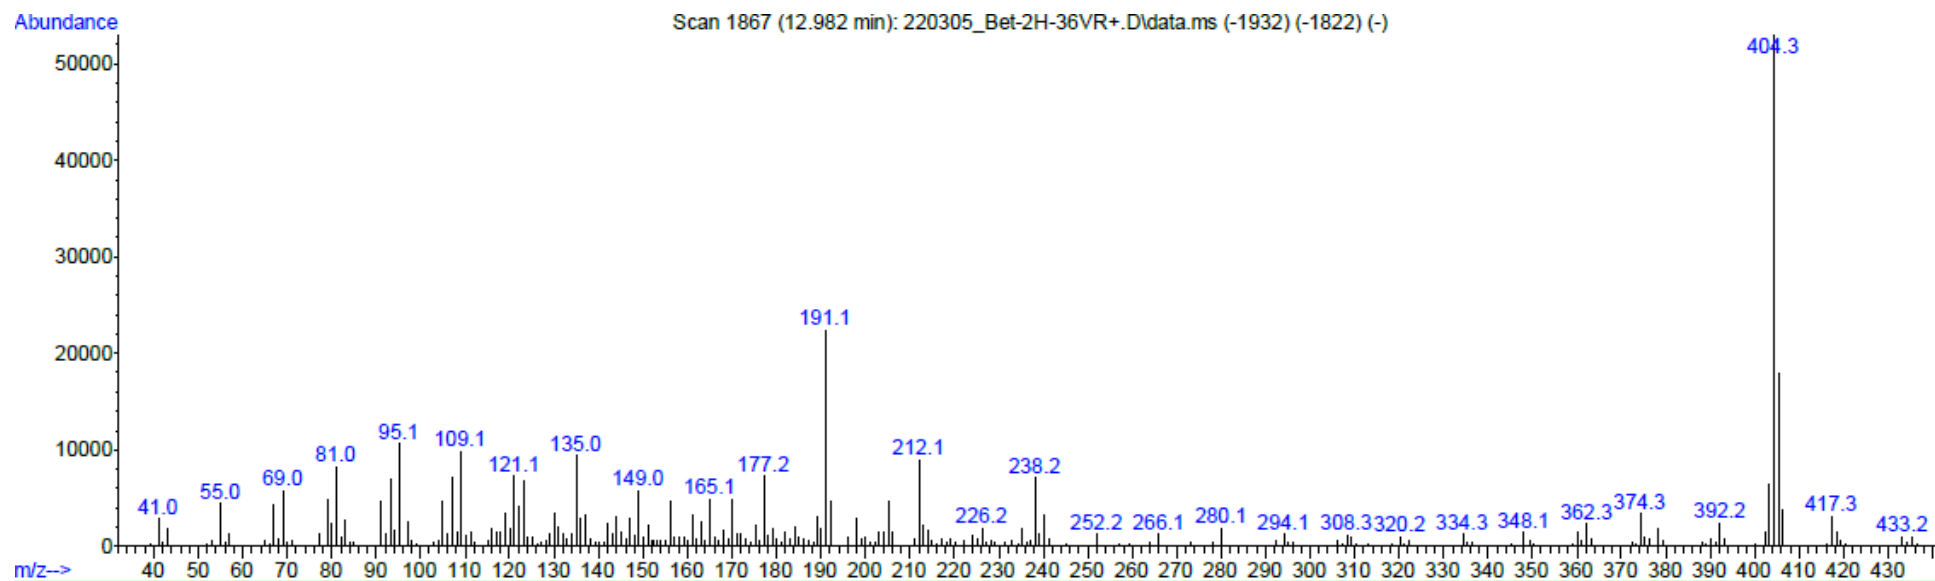

2-Cyano-24 $\beta$ ,28-dihydroxy-3-norlup-4(23)-ene (9).

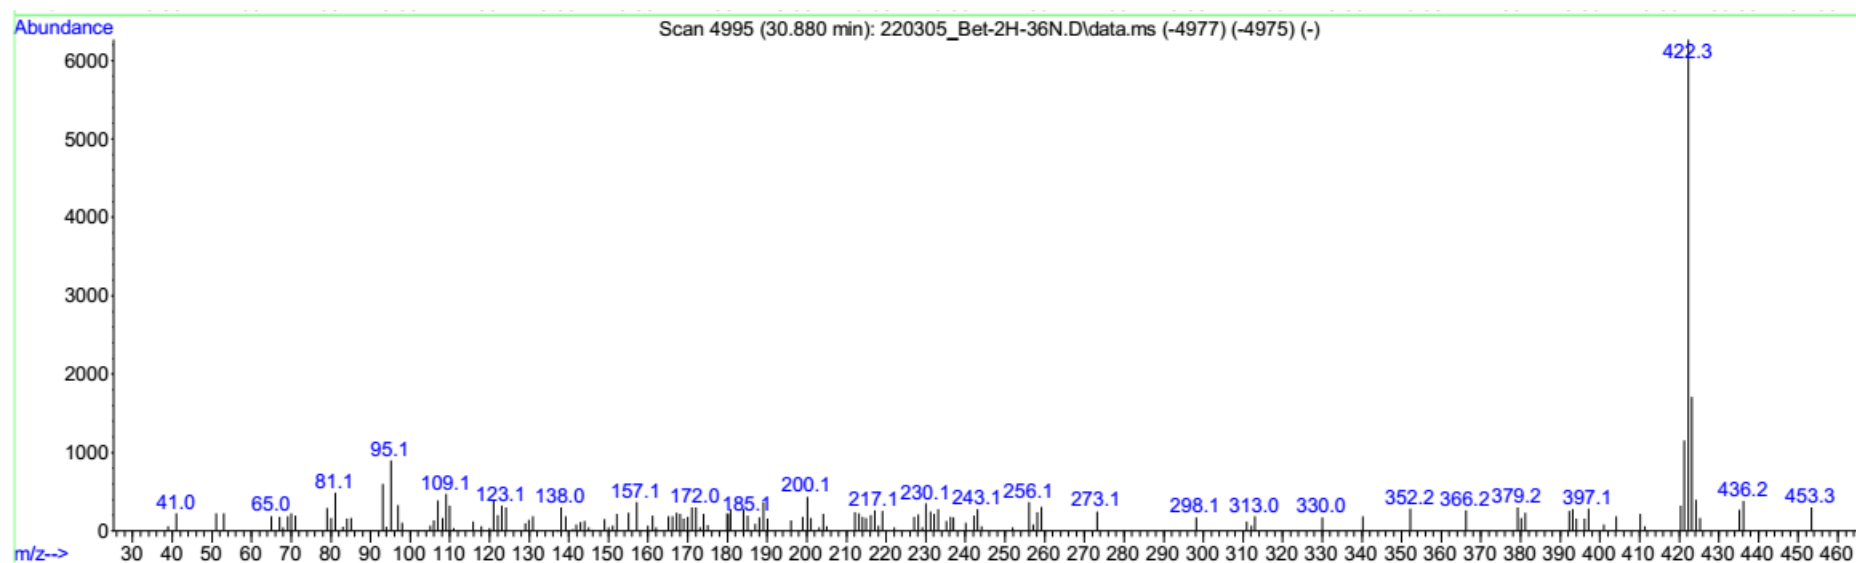

2-Cyano-3-norlup-2(24),4(23)-diene-28-oic acid methyl ester (10)

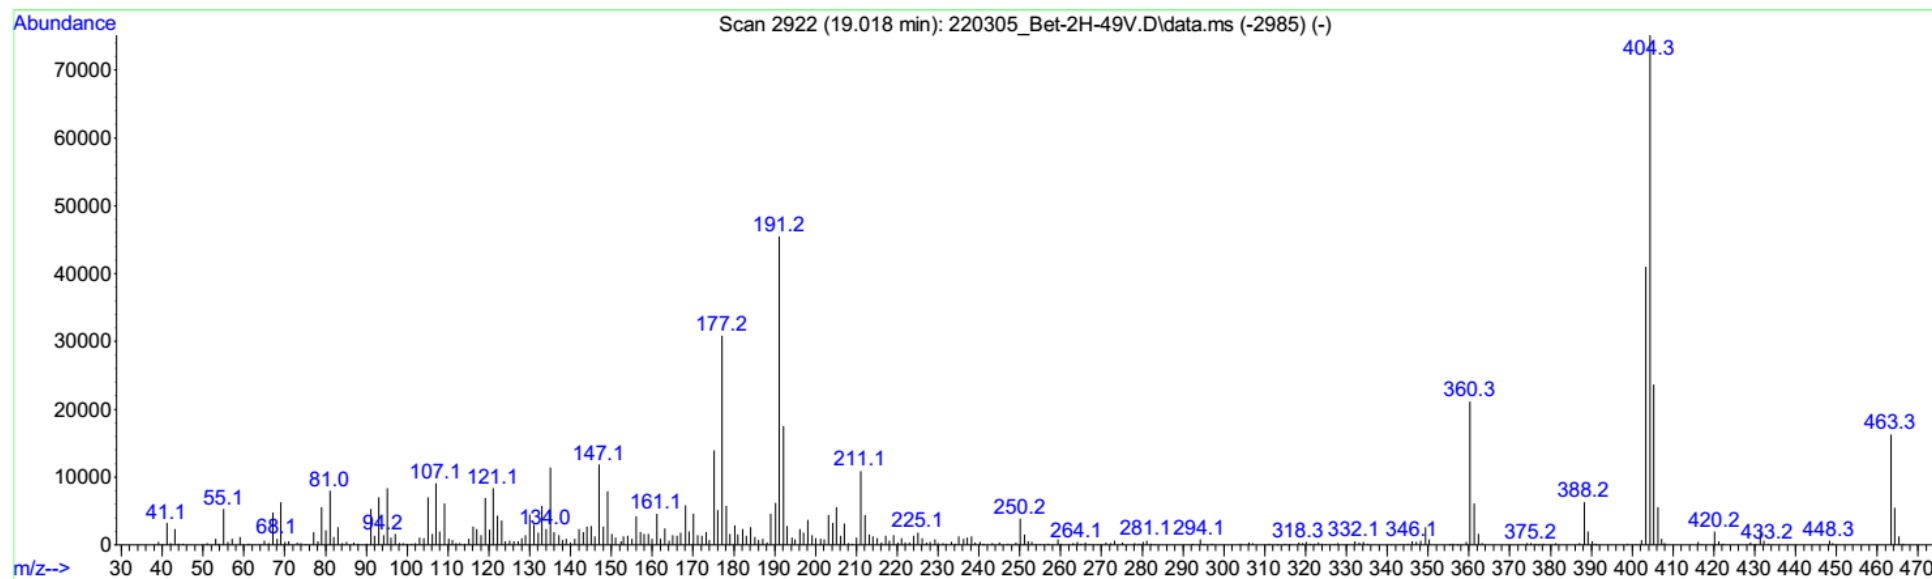

2-Cyano-24 $\beta$ -hydroxy-3-norlup-4(23)-en-28-oic acid methyl ester (11).

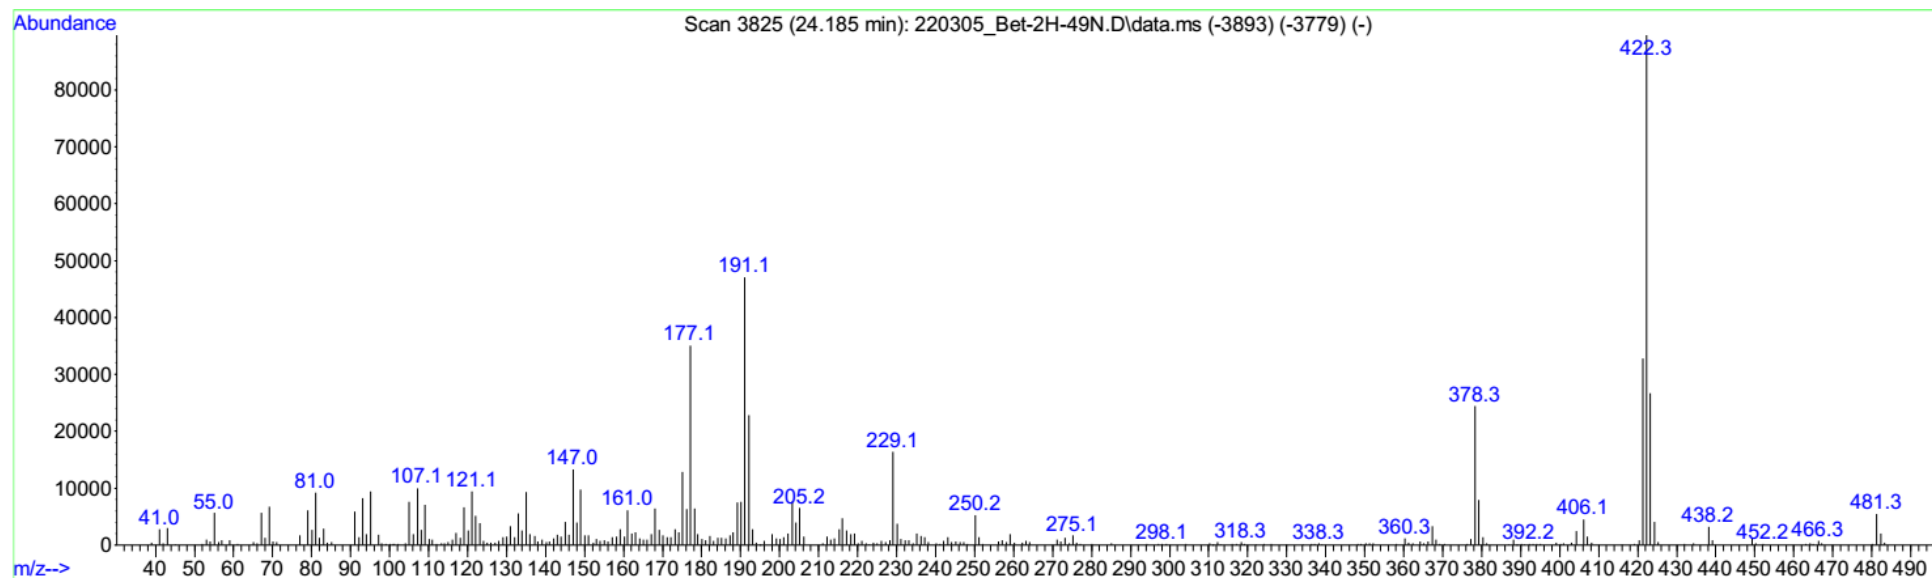

2-Cyano-28-hydroxy-3,23-dinorlup-2(4)-en (12).

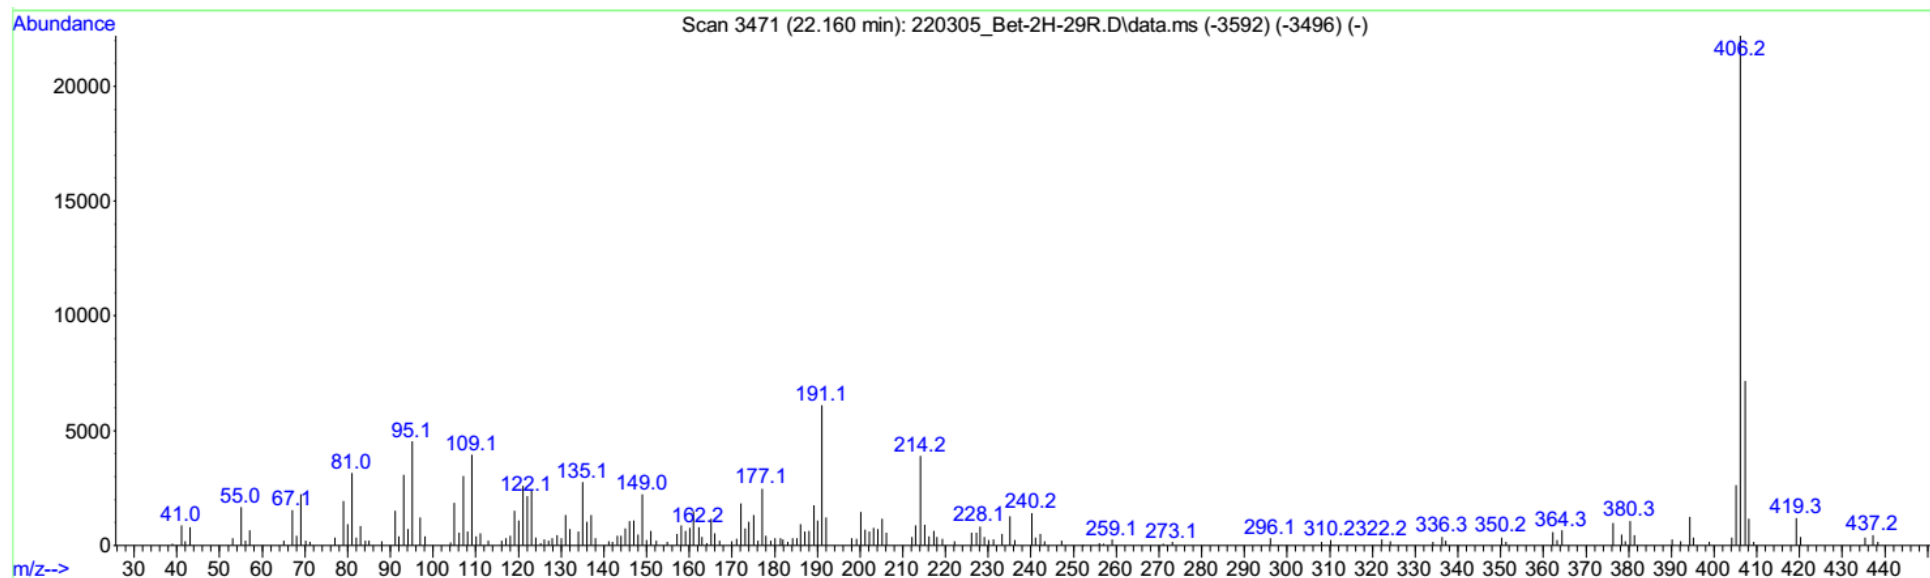

2-Cyano-3,23-dinorlup-2(4)-en-28-oic acid methyl ester (13).

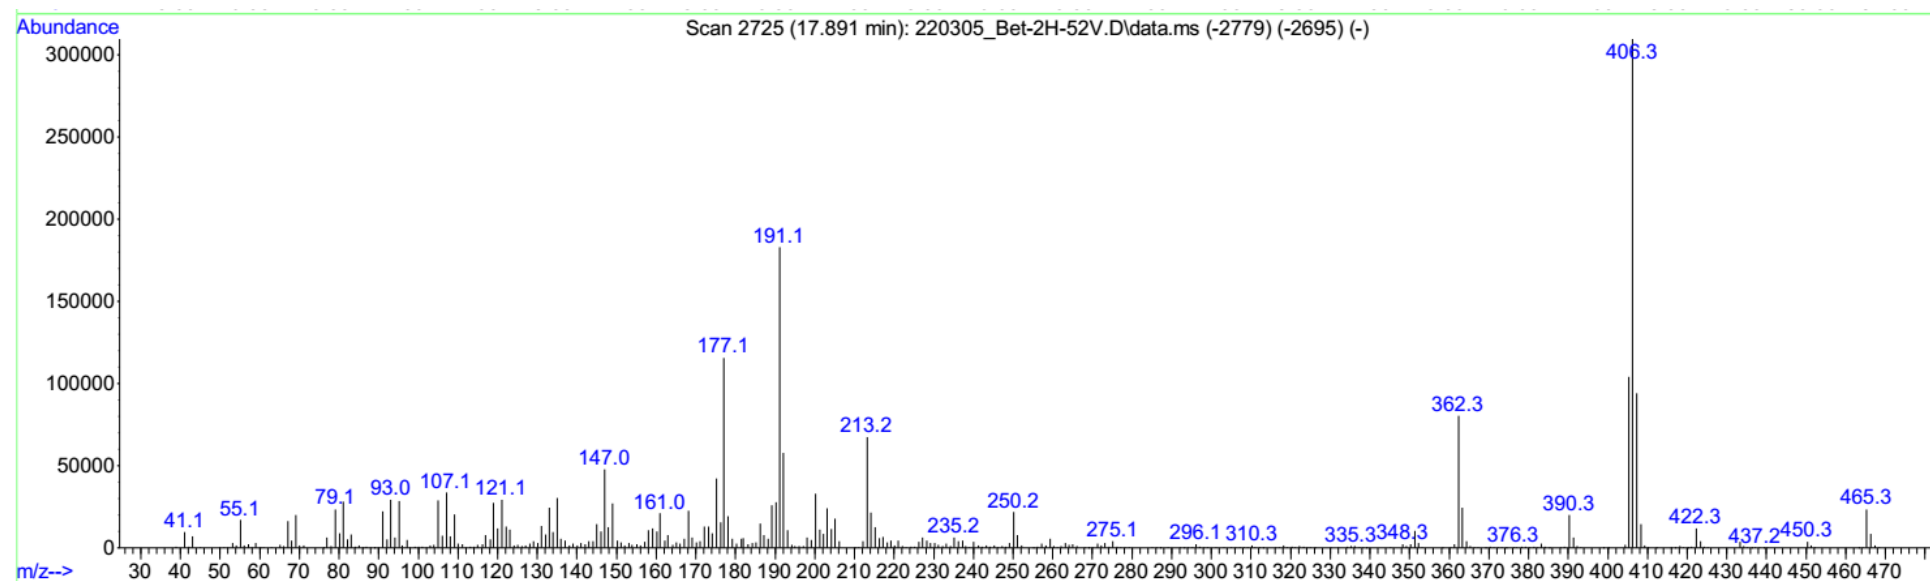



2-Cyano-28-hydroxy-4-oxo-3,23-dinorlup-2(24)-ene (14).

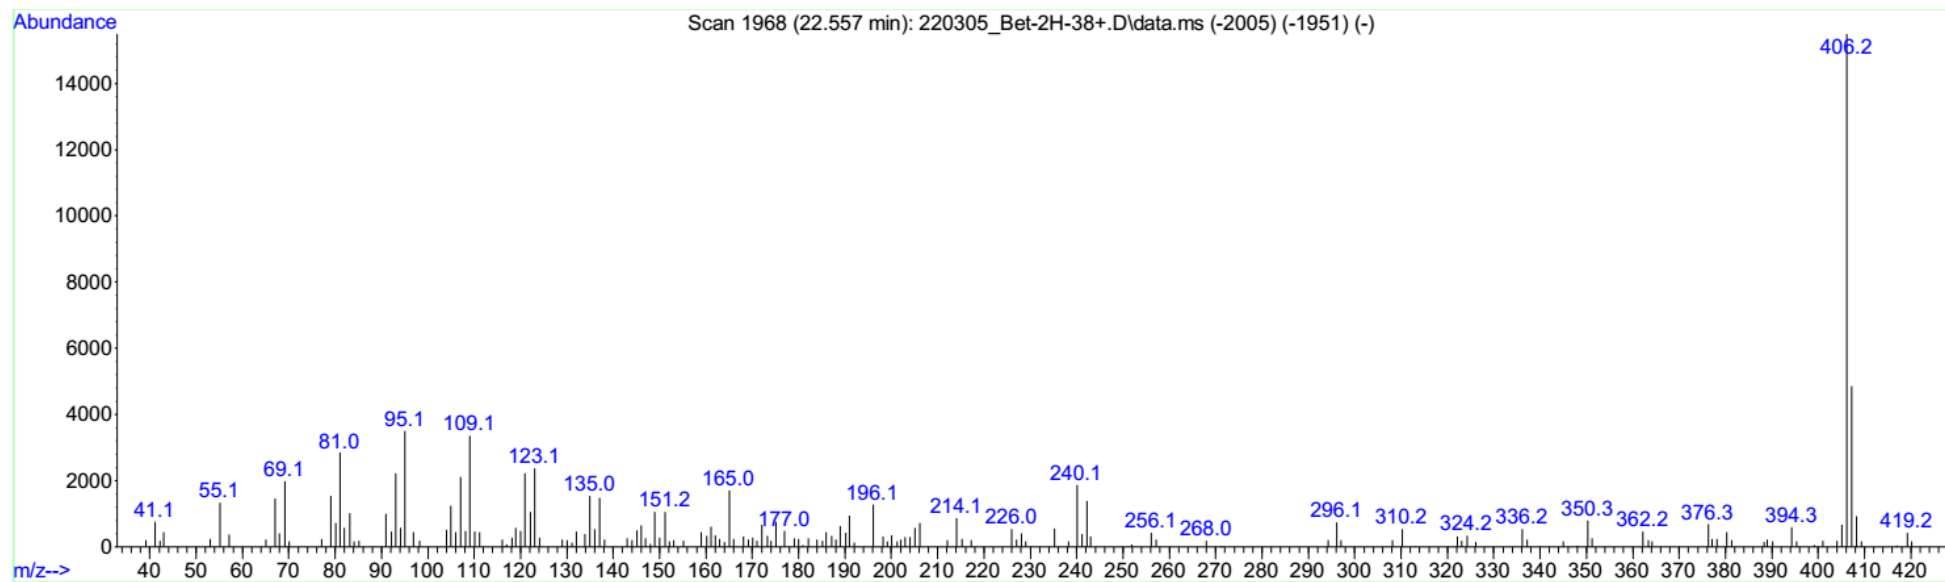

2-Cyano-4-oxo-3,23-dinorlup-2(24)-en-28-oic acid methyl ester (15).

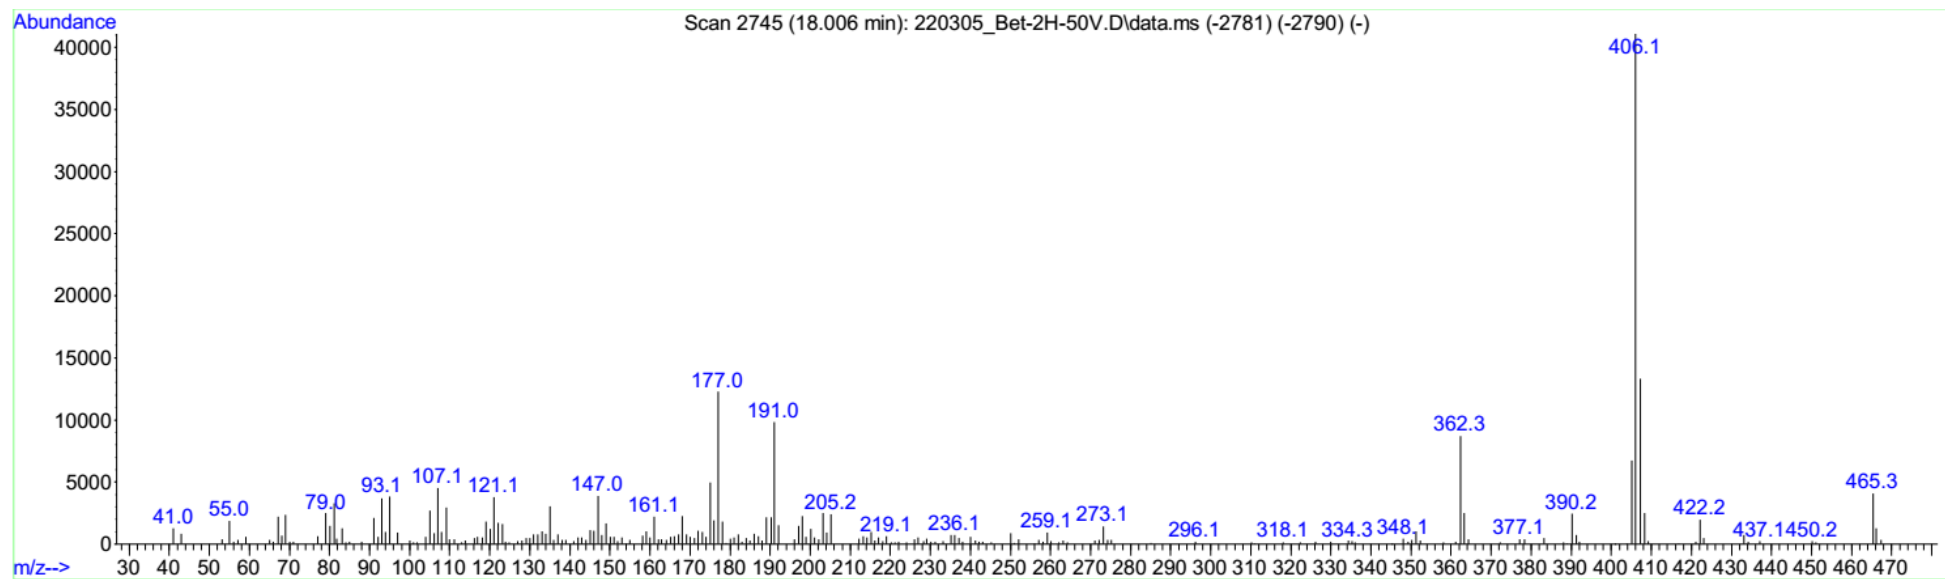

2-Cyano-28-hydroxy-4-oxo-3,23-dinorlupan (16).

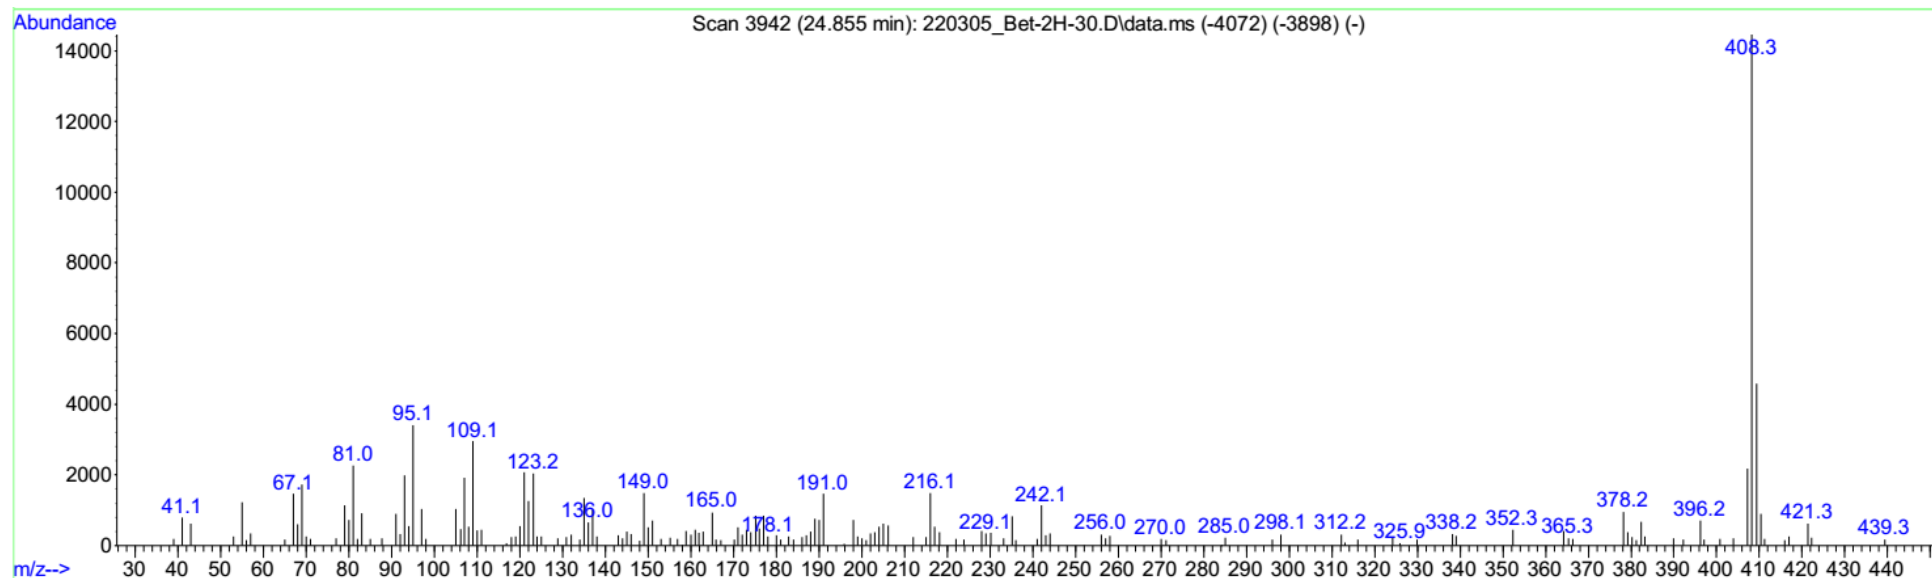

2-Cyano-4-oxo-3,23-dinorlupan-28-oic acid methyl ester (17).

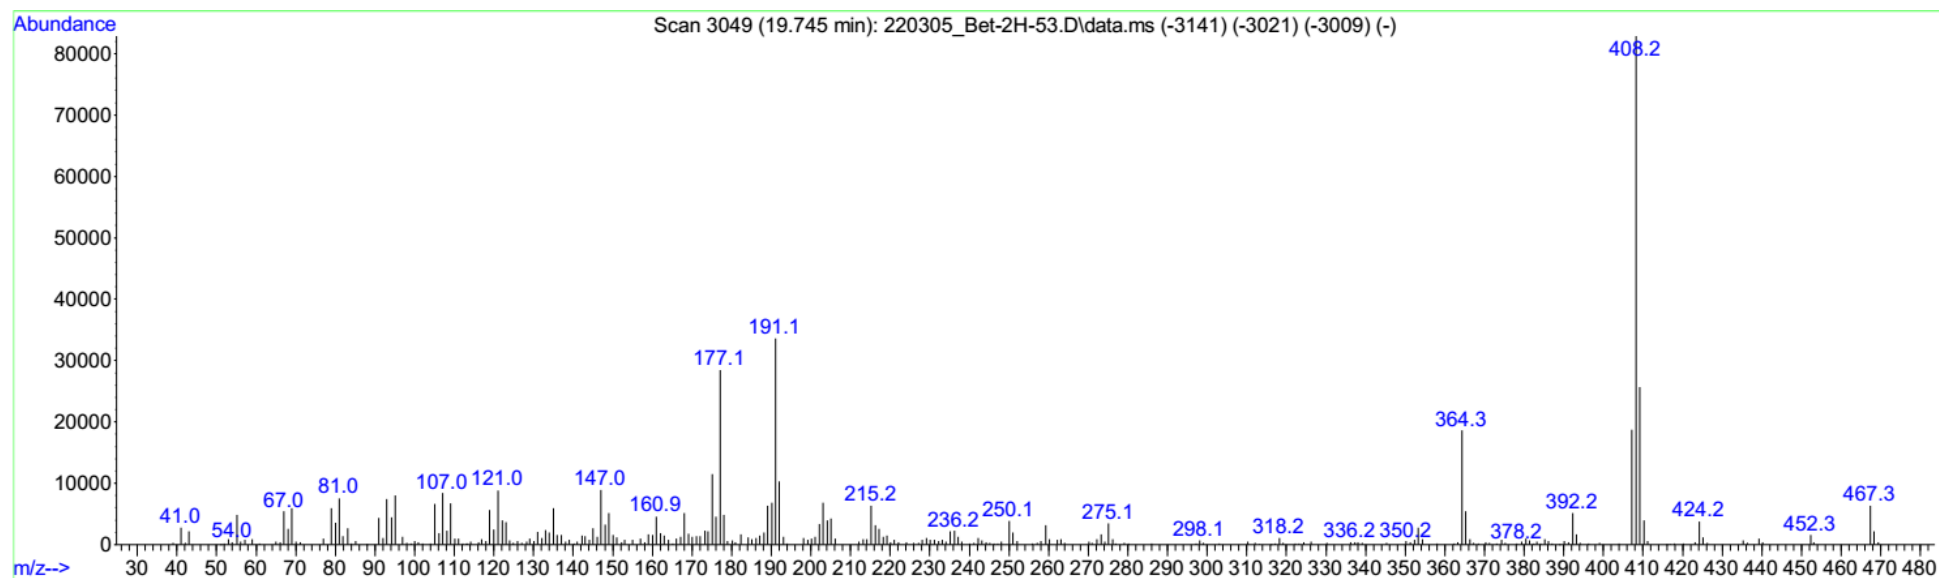

2-Cyano-4 $\beta$ ,28-dihydroxy-3,23-dinorlupan (18).

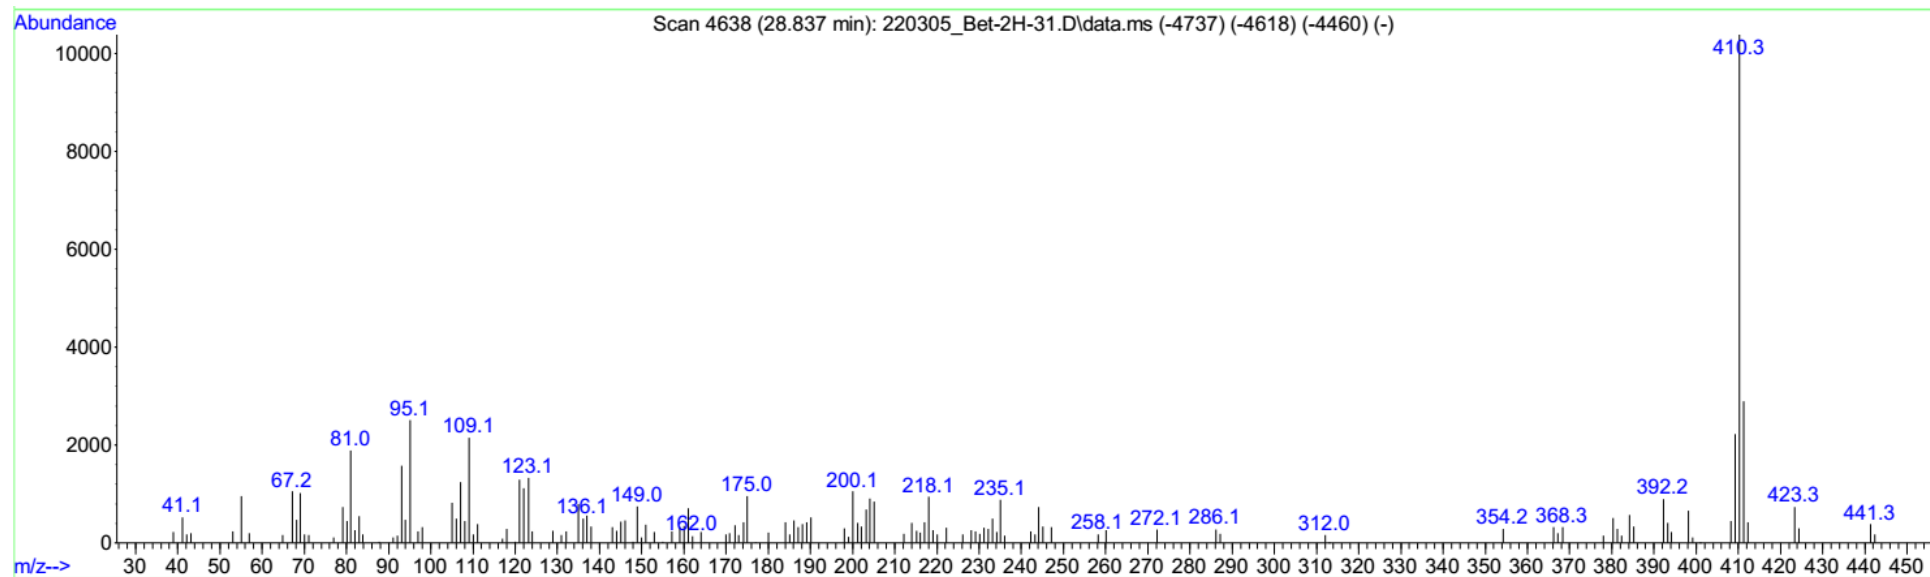

2-Cyano-4-hydroxy-3,23-dinorlupan-28-oic acid methyl ester (19).

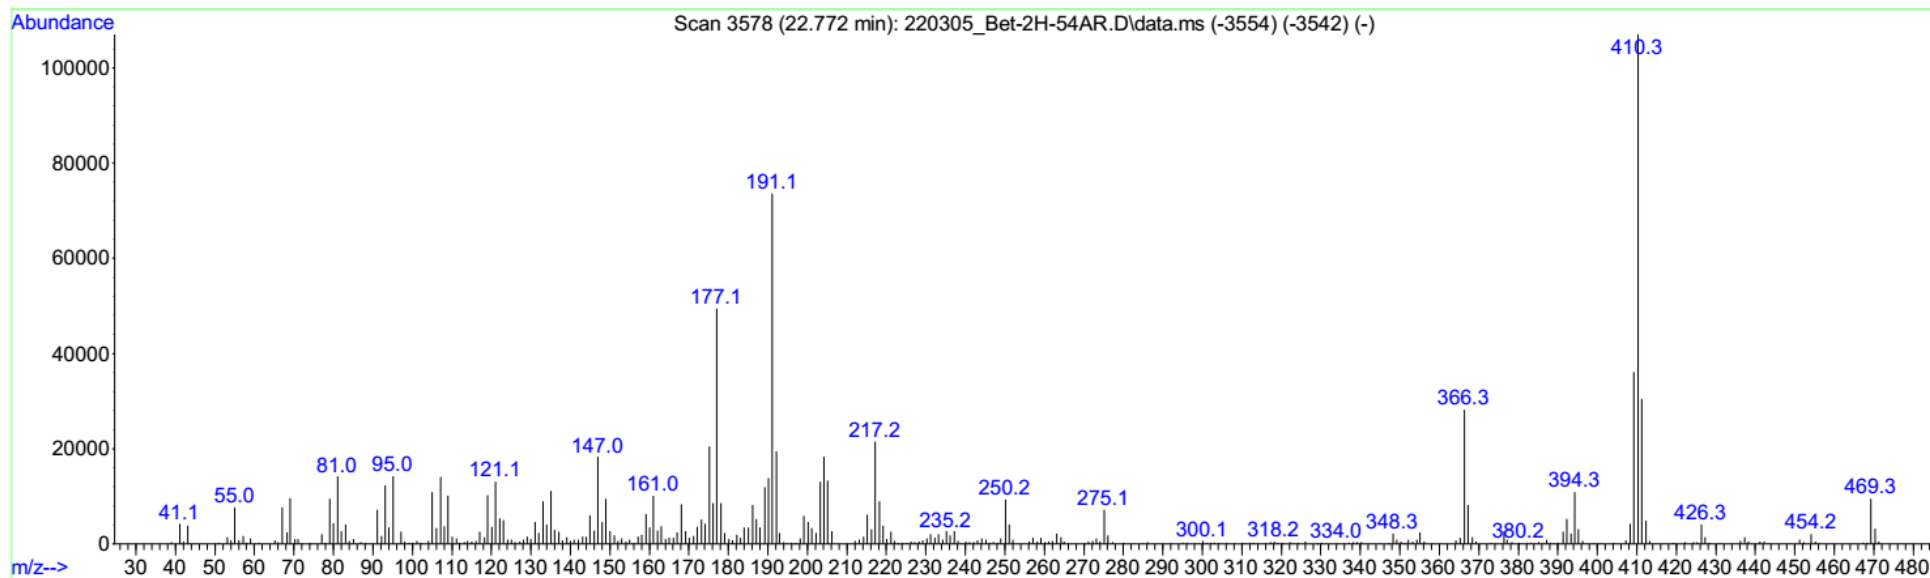

28-Benzoyloxy-2-cyano-4-oxo-3,4-seco-3,23-dinorlupan (20).

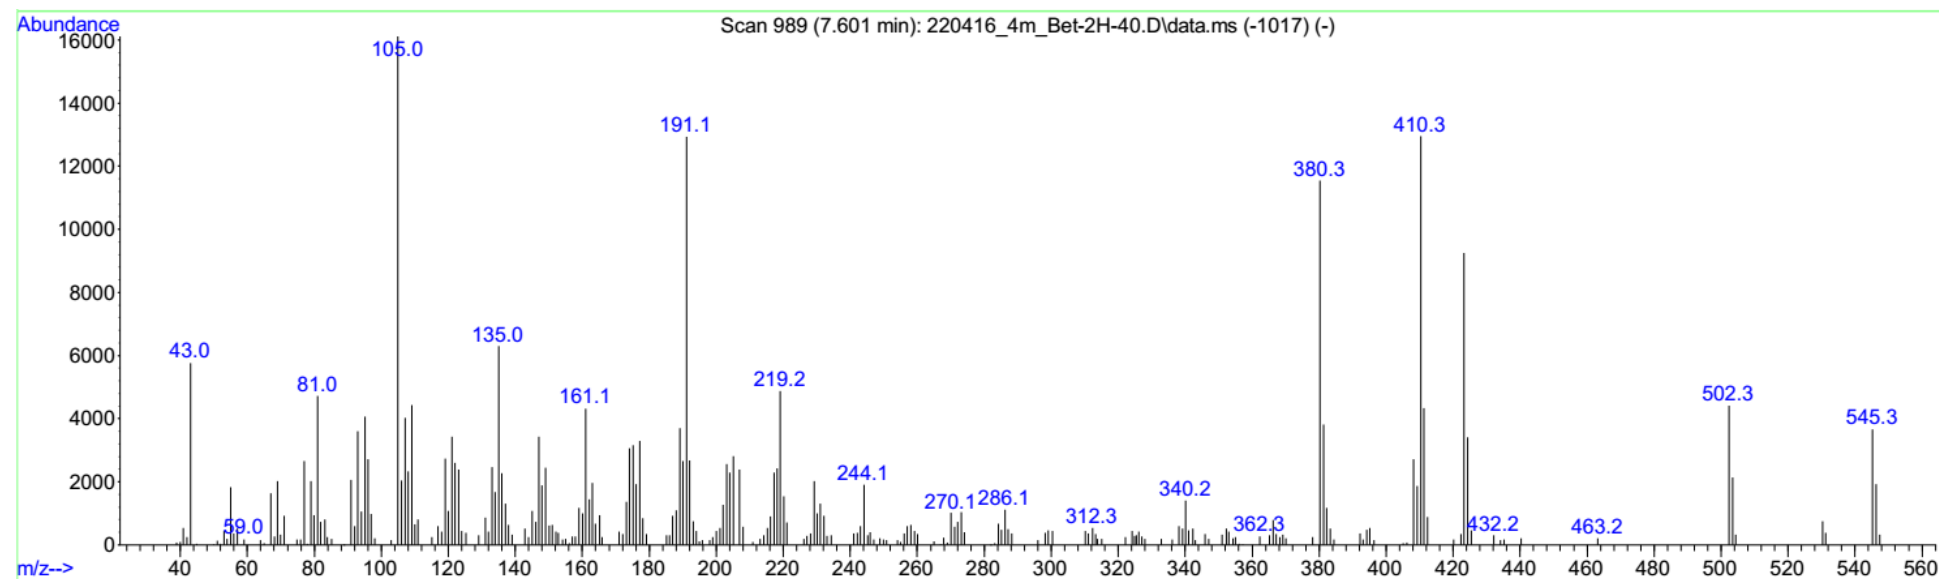

2-Cyano-4-oxo-3,4-seco-3,23-dinorlupan-28-oic acid methyl ester (21).

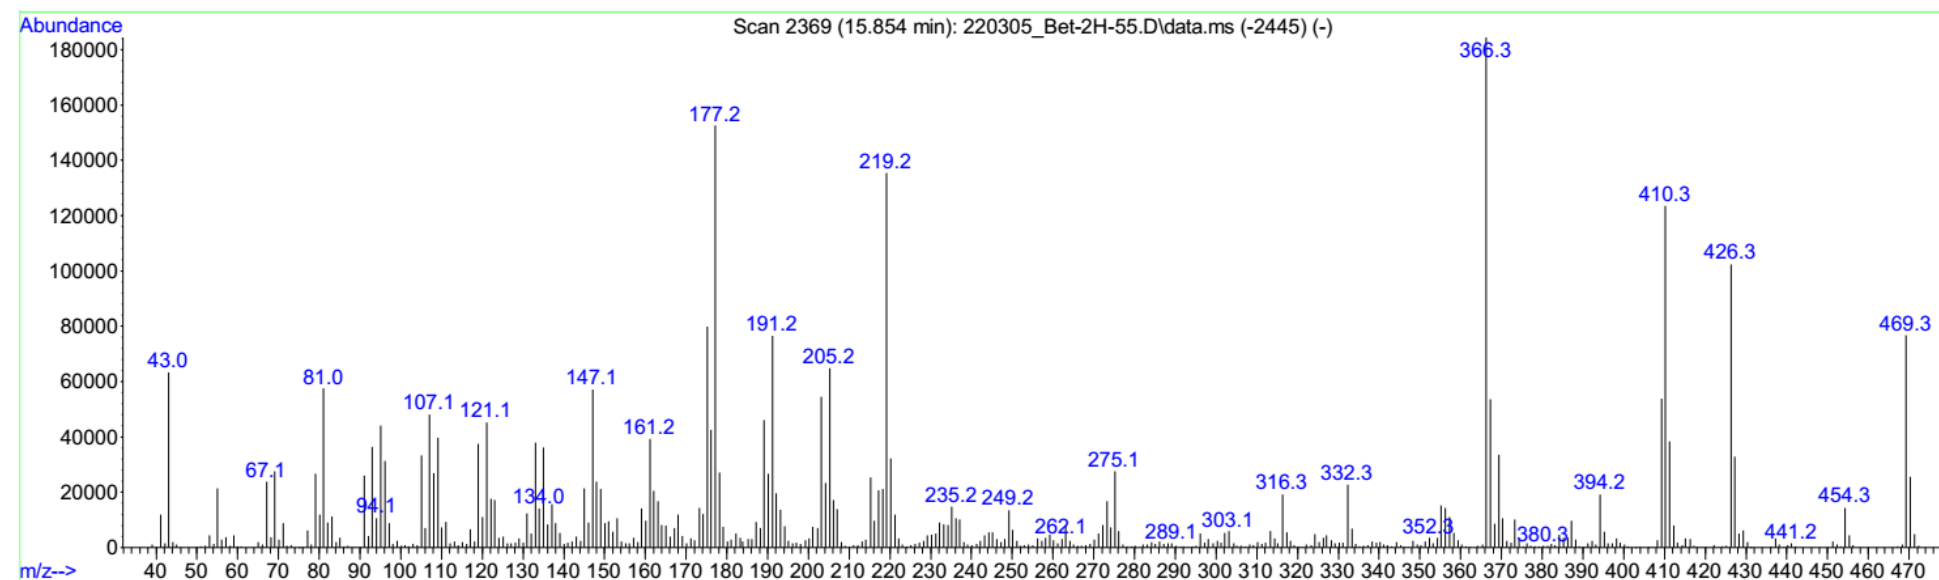

2-Cyano-28-hydroxy-3-norlup-4(23)-ene (22).

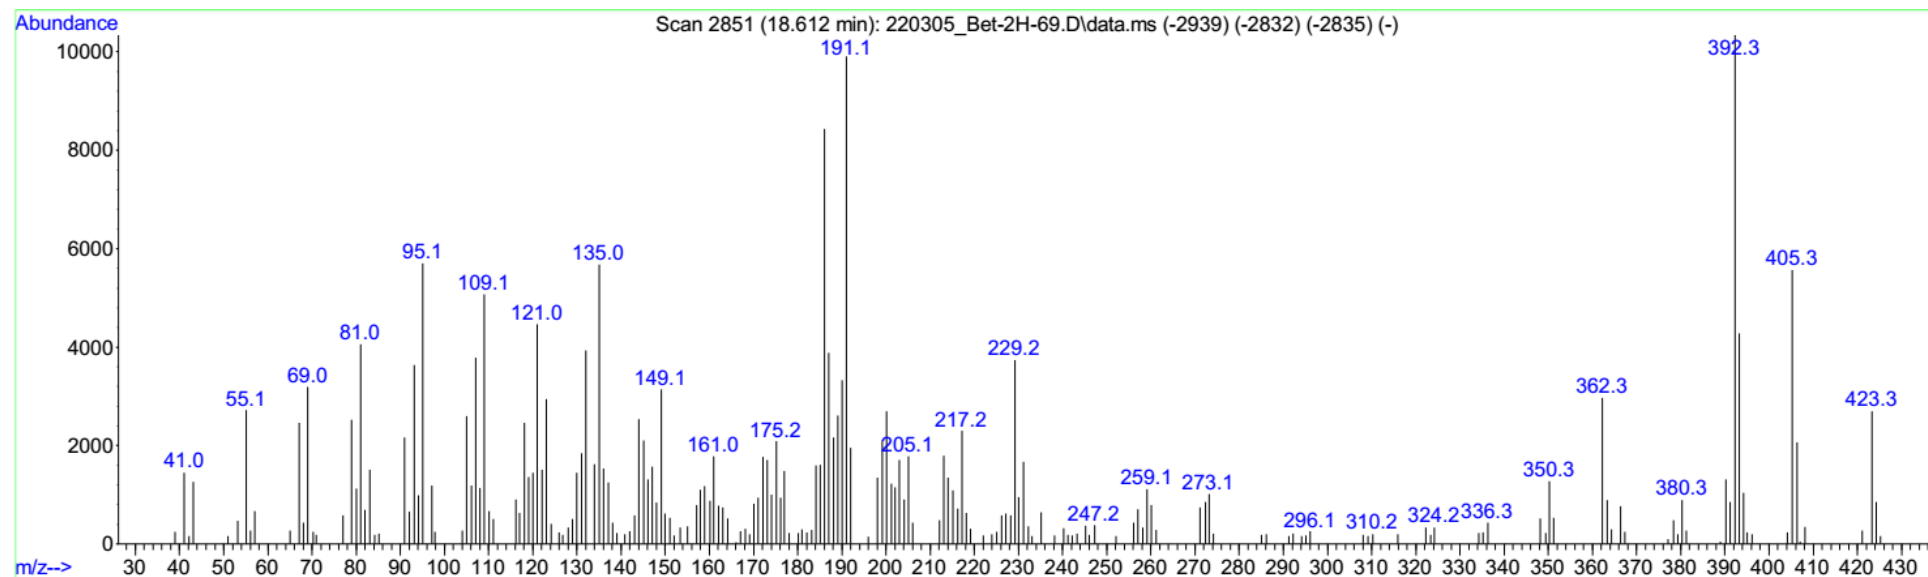

2-Cyano-3-norlup-4(23)-ene-28-oic acid methyl ester (23).

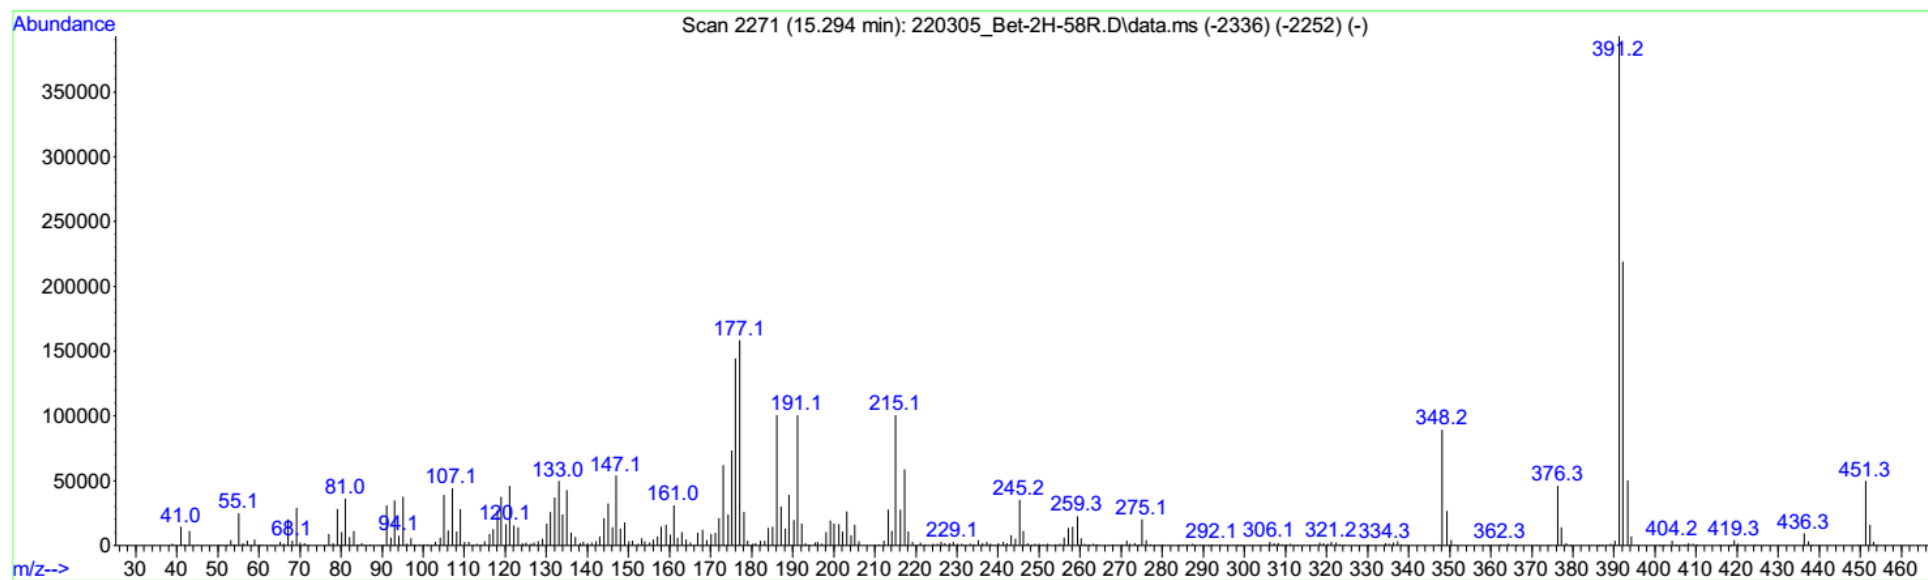

28-Benzoyloxy-24-bromo-2-cyano-4-oxo-3,4-seco-3,23-dinorlupan (28).

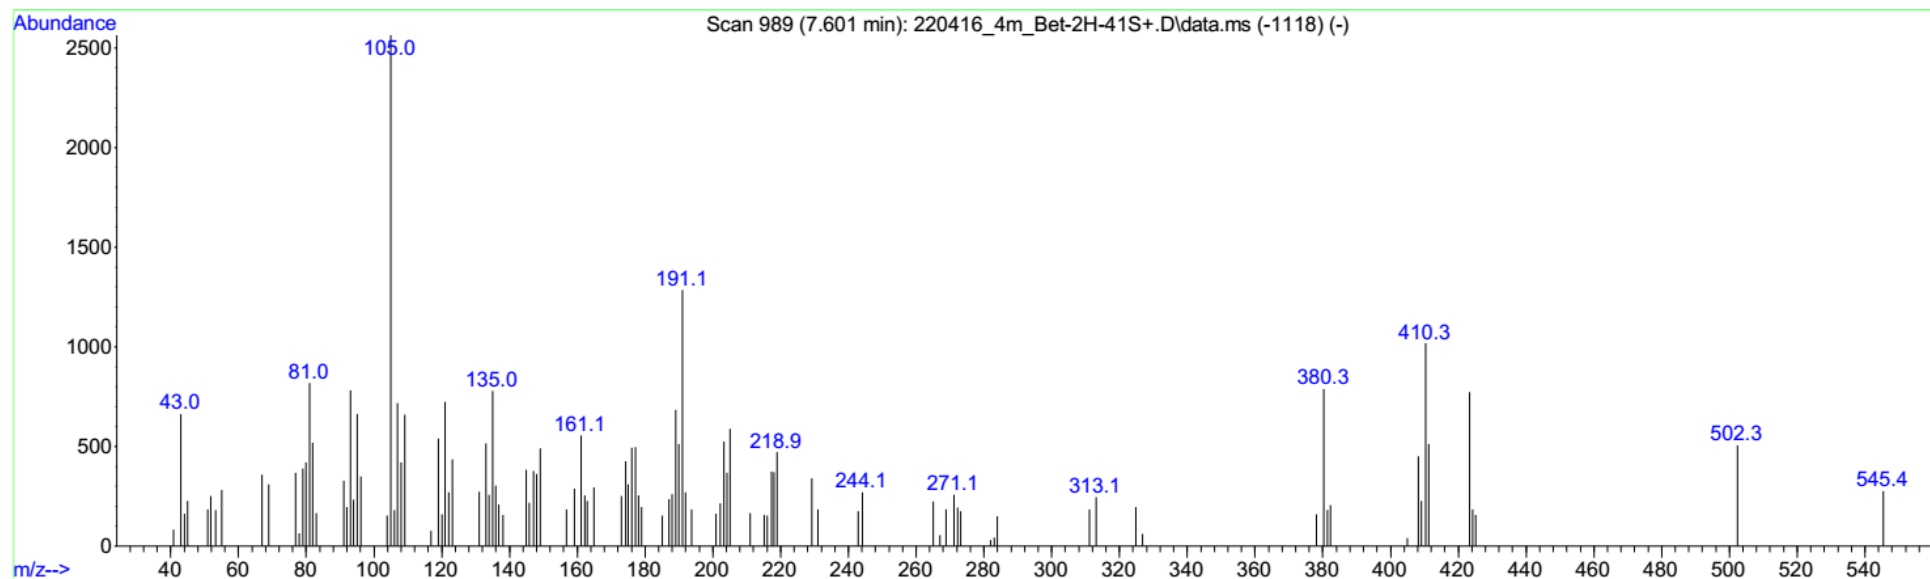

24-Bromo-2-cyano-4-oxo-3,4-seco-3,23-dinorlupan-28-oic acid methyl ester (30)

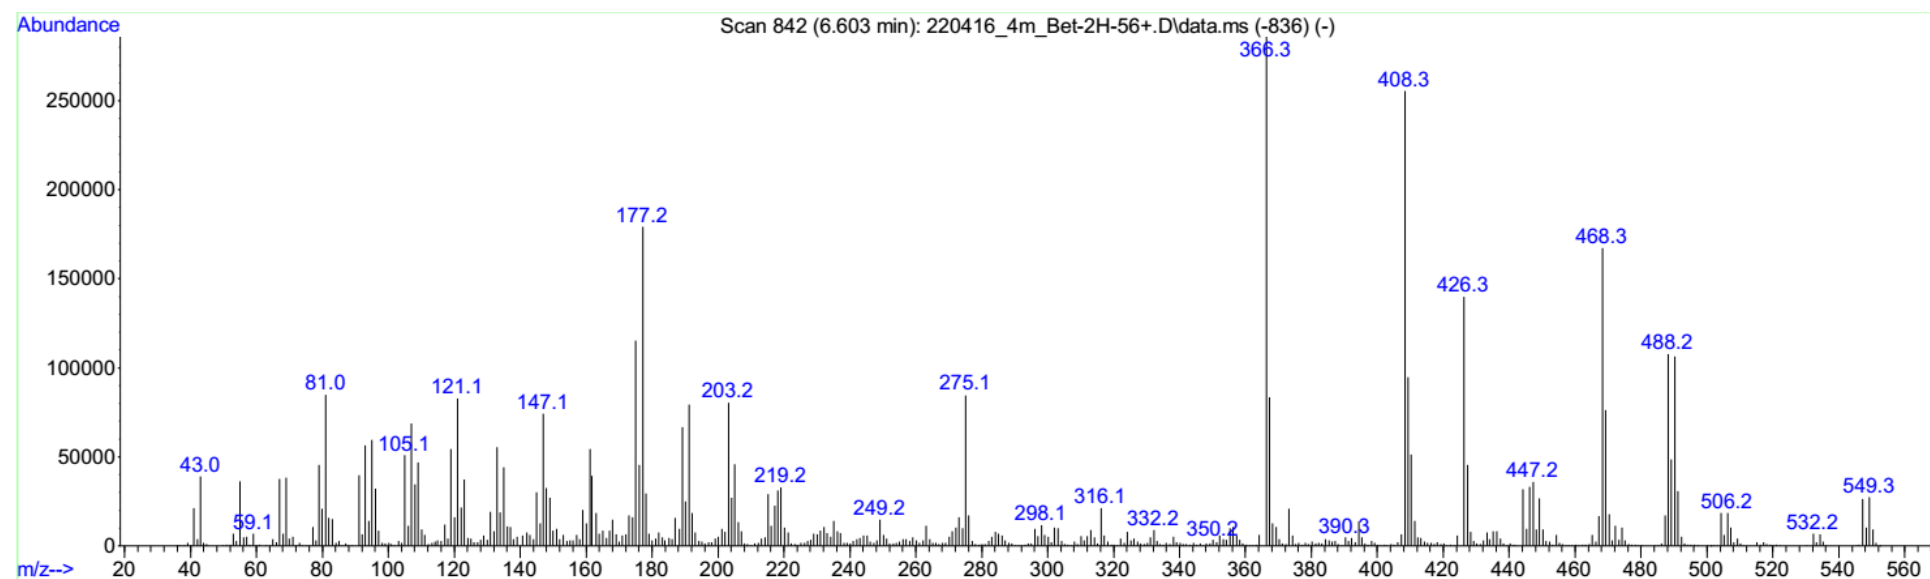

2-Cyano-24,24-dibromo-4-oxo-3,4-seco-3,23-dinorlupan-28-oic acid methyl ester (31).

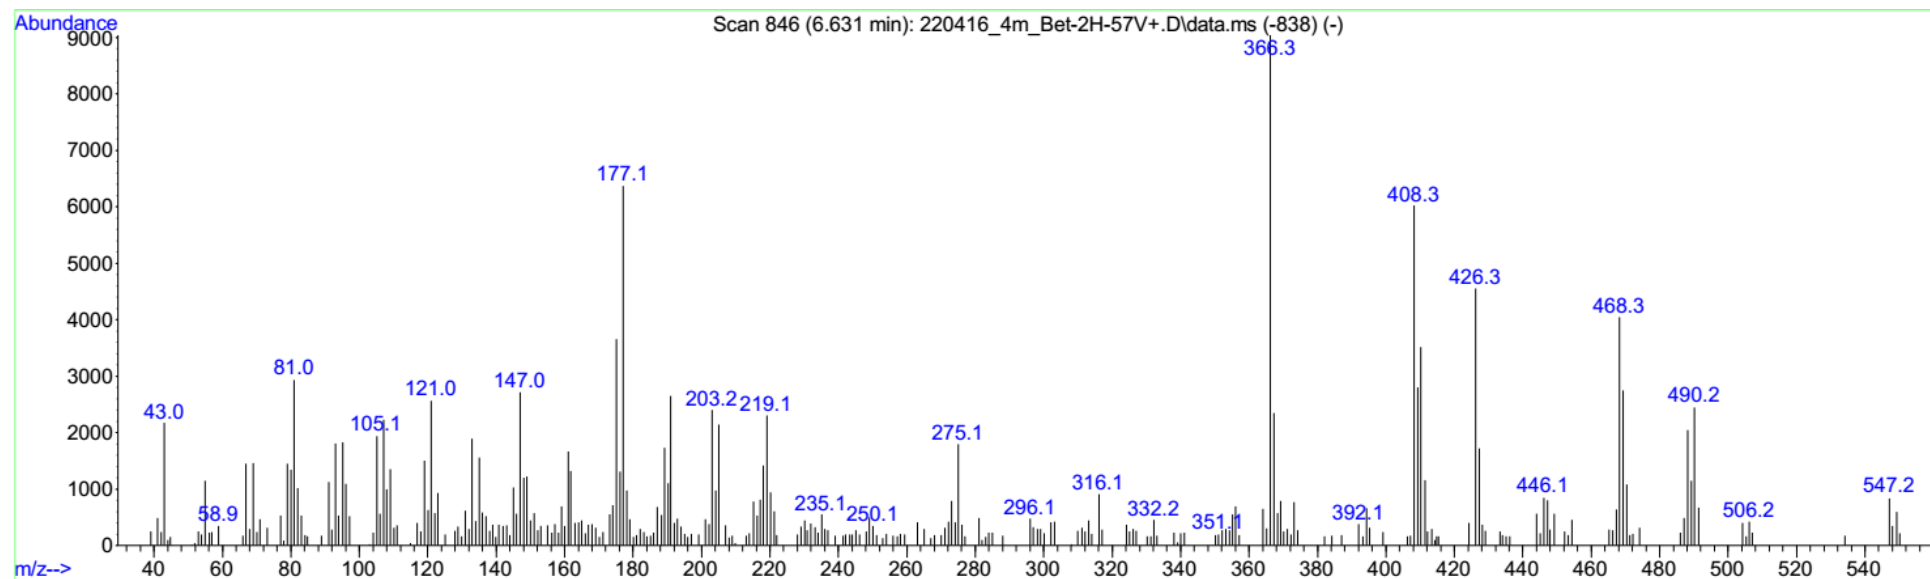

**Table S1.** The cytotoxic effect of 3,4-seco-lupane derivatives **4–23** and **28–31** against human cancer and human embryonic kidney cell lines

| Compounds      | Cell Lines                       |            |             |            |            |            |            |            |            |            |
|----------------|----------------------------------|------------|-------------|------------|------------|------------|------------|------------|------------|------------|
|                | IC <sub>50</sub> (mean ± SD), µM |            |             |            |            |            |            |            |            |            |
|                | HBL-100/Dox                      | HBL-100    | MCF-7       | HCT116     | RD TE32    | MS         | A549       | PC-3       | HEpG2      | HEK293     |
| <b>4</b>       | >100                             | >100       | >200        | >200       | >100       | >100       | >100       | >100       | >100       | >100       |
| <b>5</b>       | >100                             | >200       | >200        | >200       | >100       | >100       | >100       | >100       | >100       | >200       |
| <b>6</b>       | >200                             | >100       | >200        | >200       | >200       | >100       | >100       | >100       | >100       | >200       |
| <b>7</b>       | >200                             | >200       | >100        | >200       | >200       | >100       | >100       | >100       | >100       | >100       |
| <b>8</b>       | >200                             | >100       | >100        | >200       | >200       | >100       | >100       | >100       | >100       | >100       |
| <b>9</b>       | >100                             | >200       | >200        | >100       | >100       | >100       | >100       | >100       | >100       | >100       |
| <b>10</b>      | >200                             | >100       | >100        | >200       | >100       | >100       | >100       | >100       | >100       | >200       |
| <b>11</b>      | >200                             | 73.31±1.51 | >100        | >200       | >200       | >100       | >100       | >100       | >100       | >200       |
| <b>12</b>      | 63.03±1.92                       | 36.61±1.44 | 64.21±3.01  | 51.04±3.67 | 98.56±2.33 | >200       | 44.40±2.44 | 55.66±4.89 | >100       | 76.53±2.49 |
| <b>13</b>      | >200                             | >100       | >100        | >100       | >100       | >100       | >100       | >100       | >100       | >200       |
| <b>14</b>      | 54.01±1.82                       | 46.94±2.22 | 56.73±3.72  | 49.90±0.10 | 49.10±1.37 | 69.10±1.03 | 63.21±1.42 | 28.27±2.29 | >100       | 77.77±2.90 |
| <b>15</b>      | >100                             | >100       | >100        | >100       | >100       | >100       | >100       | >100       | >100       | >100       |
| <b>16</b>      | >200                             | >100       | >100        | >200       | >100       | >100       | >100       | >100       | >100       | >100       |
| <b>17</b>      | >200                             | >200       | >100        | >100       | >100       | >100       | >100       | >100       | >100       | >100       |
| <b>18</b>      | >200                             | >100       | >100        | >200       | >200       | >100       | >100       | >100       | >100       | >100       |
| <b>19</b>      | 21.14±2.23                       | 16.03±0.94 | 47.90±0.26  | 28.23±2.06 | 25.17±0.11 | 22.20±2.00 | 25.93±1.75 | 17.22±0.69 | 31.80±2.68 | 34.62±1.09 |
| <b>20</b>      | >200                             | >200       | >100        | >100       | >100       | >100       | >100       | >100       | >100       | >100       |
| <b>21</b>      | >200                             | >100       | 97.47±4.21  | >100       | >100       | >100       | >100       | >100       | >100       | >100       |
| <b>22</b>      | >100                             | >100       | 89.31±3.01  | 74.25±2.56 | 84.68±3.68 | >100       | >200       | 36.46±1.31 | >100       | >100       |
| <b>23</b>      | >100                             | >100       | 70.24±3.09  | >100       | >100       | >100       | >200       | >200       | >200       | >100       |
| <b>28</b>      | >200                             | >100       | 86.14±10.14 | >100       | >100       | >100       | >100       | >100       | >100       | >100       |
| <b>29</b>      | >200                             | >100       | 48.96±5.33  | >200       | 73.23±5.24 | >100       | >100       | >100       | >100       | >100       |
| <b>30</b>      | 4.53±0.21                        | 3.62±0.33  | 12.04±0.06  | 13.50±0.34 | 7.05±0.91  | 45.97±2.20 | 27.73±0.31 | 34.07±1.28 | 49.60±0.50 | 24.17±0.45 |
| <b>31 (MK)</b> | 1.80±0.14                        | 0.99±0.001 | 7.06±0.72   | 3.86±0.08  | 0.66±0.04  | 16.47±1.53 | 7.01±0.21  | 10.35±1.27 | 16.55±0.41 | 11.47±0.56 |
| <b>Dox</b>     | 29.61±0.94                       | 0.35±0.03  | 0.38±0.09   | 1.30±0.34  | 1.27 ±0.03 | 1.29±0.16  | 2.04±0.21  | 12.60±0.20 | 1.78±0.30  | 0.44±0.04  |



**Table S2.** Selectivity index (SI) values of compounds **12**, **14**, **19**, **30** and **31**

| Cell lines  | SI range of active compounds |       |      |      |         |      |
|-------------|------------------------------|-------|------|------|---------|------|
|             | 12                           | 14    | 19   | 30   | 31 (MK) | Dox  |
| MCF-7       | 1.19                         | 1.37  | 0.72 | 2.02 | 1.62    | 1.00 |
| HCT116      | 1.50                         | 1.56  | 1.23 | 1.79 | 2.95    | 0.31 |
| RD TE32     | 0.78                         | 1.58  | 1.37 | 3.41 | 16.43   | 0.31 |
| MS          | <0.38                        | 1.13  | 1.56 | 0.53 | 0.70    | 0.31 |
| A549        | 1.72                         | 1.23  | 1.34 | 0.87 | 1.64    | 0.20 |
| PC-3        | 1.37                         | 2.75  | 2.01 | 0.71 | 1.11    | 0.03 |
| HEpG2       | <0.77                        | <0.78 | 1.09 | 0.49 | 0.69    | 0.22 |
| HBL-100     | 2.09                         | 1.66  | 2.16 | 6.72 | 11.50   | 1.00 |
| HBL-100/Dox | 1.21                         | 1.44  | 1.64 | 5.37 | 6.39    | 0.01 |

**Table S3.** Cell cycle distribution of HBL-100 cells treated with **MK** and Dox (at doses corresponding to IC<sub>50</sub> values) for 12-24 h.

| Time, h   | Samples         | Cell cycle of HBL-100, % |            |            |            |
|-----------|-----------------|--------------------------|------------|------------|------------|
|           |                 | subG0/G1                 | G0/G1      | S-phase    | G2/M       |
| <b>12</b> | Untreated cells | 1.13±0.13                | 63.27±0.13 | 22.34±0.31 | 14.38±0.15 |
|           | <b>MK</b>       | 1.44±0.44                | 59.78±0.94 | 24.35±0.43 | 15.88±0.50 |
|           | Dox             | 1.43±0.02                | 25.46±0.03 | 48.19±0.09 | 26.35±0.05 |
| <b>13</b> | Untreated cells | 0.81±0.06                | 60.44±0.94 | 24.85±0.96 | 14.71±0.02 |
|           | <b>MK</b>       | 1.74±0.05                | 56.56±0.16 | 26.74±0.54 | 16.70±0.71 |
|           | Dox             | 1.46±0.01                | 22.99±0.19 | 46.86±0.22 | 28.03±0.03 |
| <b>14</b> | Untreated cells | 1.19±0.09                | 61.50±1.47 | 24.13±1.67 | 15.41±0.20 |
|           | <b>MK</b>       | 1.74±0.18                | 56.69±0.01 | 26.35±0.16 | 16.96±0.16 |
|           | Dox             | 2.37±0.03                | 22.99±0.24 | 48.25±0.51 | 28.76±0.75 |
| <b>15</b> | Untreated cells | 1.01±0.12                | 63.87±1.01 | 23.19±0.19 | 12.94±1.20 |
|           | <b>MK</b>       | 2.38±0.42                | 57.83±1.04 | 25.88±0.49 | 16.29±0.55 |
|           | Dox             | 1.72±0.15                | 17.32±0.29 | 57.27±0.14 | 25.41±0.16 |
| <b>16</b> | Untreated cells | 1.04±0.02                | 59.62±0.75 | 24.75±0.41 | 15.63±0.34 |
|           | <b>MK</b>       | 4.89±1.93                | 56.91±0.07 | 24.26±0.08 | 18.83±0.14 |
|           | Dox             | 2.28±0.19                | 24.52±1.28 | 61.28±2.01 | 14.20±3.22 |
| <b>17</b> | Untreated cells | 0.89±0.12                | 56.67±0.46 | 26.41±0.76 | 16.92±1.23 |
|           | <b>MK</b>       | 3.50±0.42                | 55.78±0.79 | 25.83±0.24 | 18.39±1.04 |
|           | Dox             | 1.88±0.26                | 12.11±1.06 | 56.17±1.64 | 31.72±0.57 |
| <b>18</b> | Untreated cells | 0.93±0.14                | 58.31±1.45 | 27.97±0.65 | 14.10±0.79 |
|           | <b>MK</b>       | 4.39±0.82                | 56.81±0.03 | 27.81±0.04 | 15.38±0.01 |
|           | Dox             | 3.04±0.91                | 8.10±0.01  | 55.42±0.92 | 36.48±0.93 |
| <b>24</b> | Untreated cells | 1.30±0.42                | 55.37±1.15 | 27.97±0.64 | 16.66±0.50 |
|           | <b>MK</b>       | 8.22±0.59                | 66.48±1.33 | 29.09±0.89 | 4.43±0.50  |
|           | Dox             | 2.04±0.45                | 4.88±0.78  | 76.69±0.75 | 18.43±0.75 |

**Table S4.** Cell cycle distribution of HBL-100/Dox cells treated with **MK** and Dox (at doses corresponding to IC<sub>50</sub> values) for 12-24 h.

| Time, h   | Samples         | Cell cycle of HBL-100/Dox, % |            |            |            |
|-----------|-----------------|------------------------------|------------|------------|------------|
|           |                 | subG0/G1                     | G0/G1      | S-phase    | G2/M       |
| <b>12</b> | Untreated cells | 0.20±0.14                    | 53.09±3.62 | 30.10±3.09 | 16.81±0.53 |
|           | <b>MK</b>       | 4.84±1.48                    | 50.93±0.43 | 30.69±0.04 | 18.38±0.34 |
|           | Dox             | 2.21±0.49                    | 39.62±0.67 | 50.74±0.99 | 9.63±1.66  |
| <b>13</b> | Untreated cells | 1.24±0.41                    | 51.13±0.58 | 34.79±1.68 | 14.08±2.27 |
|           | <b>MK</b>       | 4.89±0.48                    | 47.82±0.67 | 34.76±0.20 | 17.42±0.46 |
|           | Dox             | 2.40±0.55                    | 34.77±0.94 | 53.50±2.04 | 11.74±1.09 |
| <b>14</b> | Untreated cells | 1.25±0.19                    | 43.57±2.58 | 37.17±1.69 | 19.26±0.89 |
|           | <b>MK</b>       | 4.87±0.60                    | 51.68±1.34 | 33.78±1.08 | 14.54±0.25 |
|           | Dox             | 2.24±1.12                    | 32.36±0.50 | 57.31±0.68 | 10.30±0.17 |
| <b>15</b> | Untreated cells | 1.40±0.35                    | 45.45±2.04 | 36.48±1.20 | 18.07±0.84 |
|           | <b>MK</b>       | 5.06±0.09                    | 52.12±1.18 | 33.36±2.57 | 14.52±1.40 |
|           | Dox             | 1.37±0.47                    | 35.29±3.38 | 56.60±1.88 | 8.10±1.49  |
| <b>16</b> | Untreated cells | 1.81±0.11                    | 50.52±0.66 | 31.97±1.23 | 17.51±0.56 |
|           | <b>MK</b>       | 6.55±0.11                    | 51.84±0.88 | 25.94±2.58 | 22.22±1.70 |
|           | Dox             | 2.30±0.47                    | 32.41±0.43 | 56.07±0.72 | 11.52±1.13 |
| <b>17</b> | Untreated cells | 1.87±0.22                    | 40.34±1.76 | 38.61±0.60 | 21.16±0.03 |
|           | <b>MK</b>       | 9.08±0.39                    | 52.16±1.94 | 28.02±1.34 | 19.82±0.60 |
|           | Dox             | 2.12±0.54                    | 26.86±0.57 | 57.98±1.34 | 15.16±0.77 |
| <b>18</b> | Untreated cells | 1.72±0.74                    | 39.26±0.57 | 39.61±0.60 | 21.13±0.03 |
|           | <b>MK</b>       | 10.42±0.98                   | 57.26±1.18 | 17.19±2.31 | 25.55±1.12 |
|           | Dox             | 3.70±1.08                    | 28.59±0.59 | 56.22±1.37 | 15.19±1.98 |
| <b>24</b> | Untreated cells | 2.23±0.34                    | 51.24±1.17 | 35.58±1.10 | 13.19±0.07 |
|           | <b>MK</b>       | 13.47±0.18                   | 64.14±0.55 | 8.99±0.42  | 26.87±0.13 |
|           | Dox             | 2.44±0.68                    | 19.60±2.59 | 73.17±2.11 | 4.76±1.02  |

**Table S5.** Annexin V-FITC and PI-stained HBL-100 and HBL-100/Dox cells

| Compound                        | Viable cells, % | Early apoptotic cells, % | Late apoptotic cells, % | Dead cells, % |
|---------------------------------|-----------------|--------------------------|-------------------------|---------------|
| <b>HBL-100 cells</b>            |                 |                          |                         |               |
| Untreated cells                 | 97.30±0.35      | 2.12±0.20                | 0.15±0.04               | 0.42±0.12     |
| Dox                             | 83.89±0.82      | 12.35±0.42               | 1.93±0.29               | 1.80±0.31     |
| <b>MK</b> (IC <sub>50</sub> )   | 89.58±0.94      | 4.43±0.49                | 3.59±0.82               | 2.69±0.13     |
| <b>MK</b> (2xIC <sub>50</sub> ) | 76.73±1.19      | 7.29±0.29                | 10.37±1.01              | 5.59±0.46     |
| <b>HBL-100/Dox cells</b>        |                 |                          |                         |               |
| Untreated cells                 | 97.37±0.25      | 1.41±0.25                | 0.27±0.14               | 1.05±0.34     |
| Dox                             | 95.74±1.10      | 2.56±0.37                | 0.82±0.55               | 0.84±0.24     |
| <b>MK</b> (IC <sub>50</sub> )   | 87.82±0.45      | 5.04±0.52                | 4.74±0.04               | 2.52±0.08     |
| <b>MK</b> (2xIC <sub>50</sub> ) | 78.69±1.29      | 5.50±0.44                | 10.94±0.82              | 4.59±0.45     |

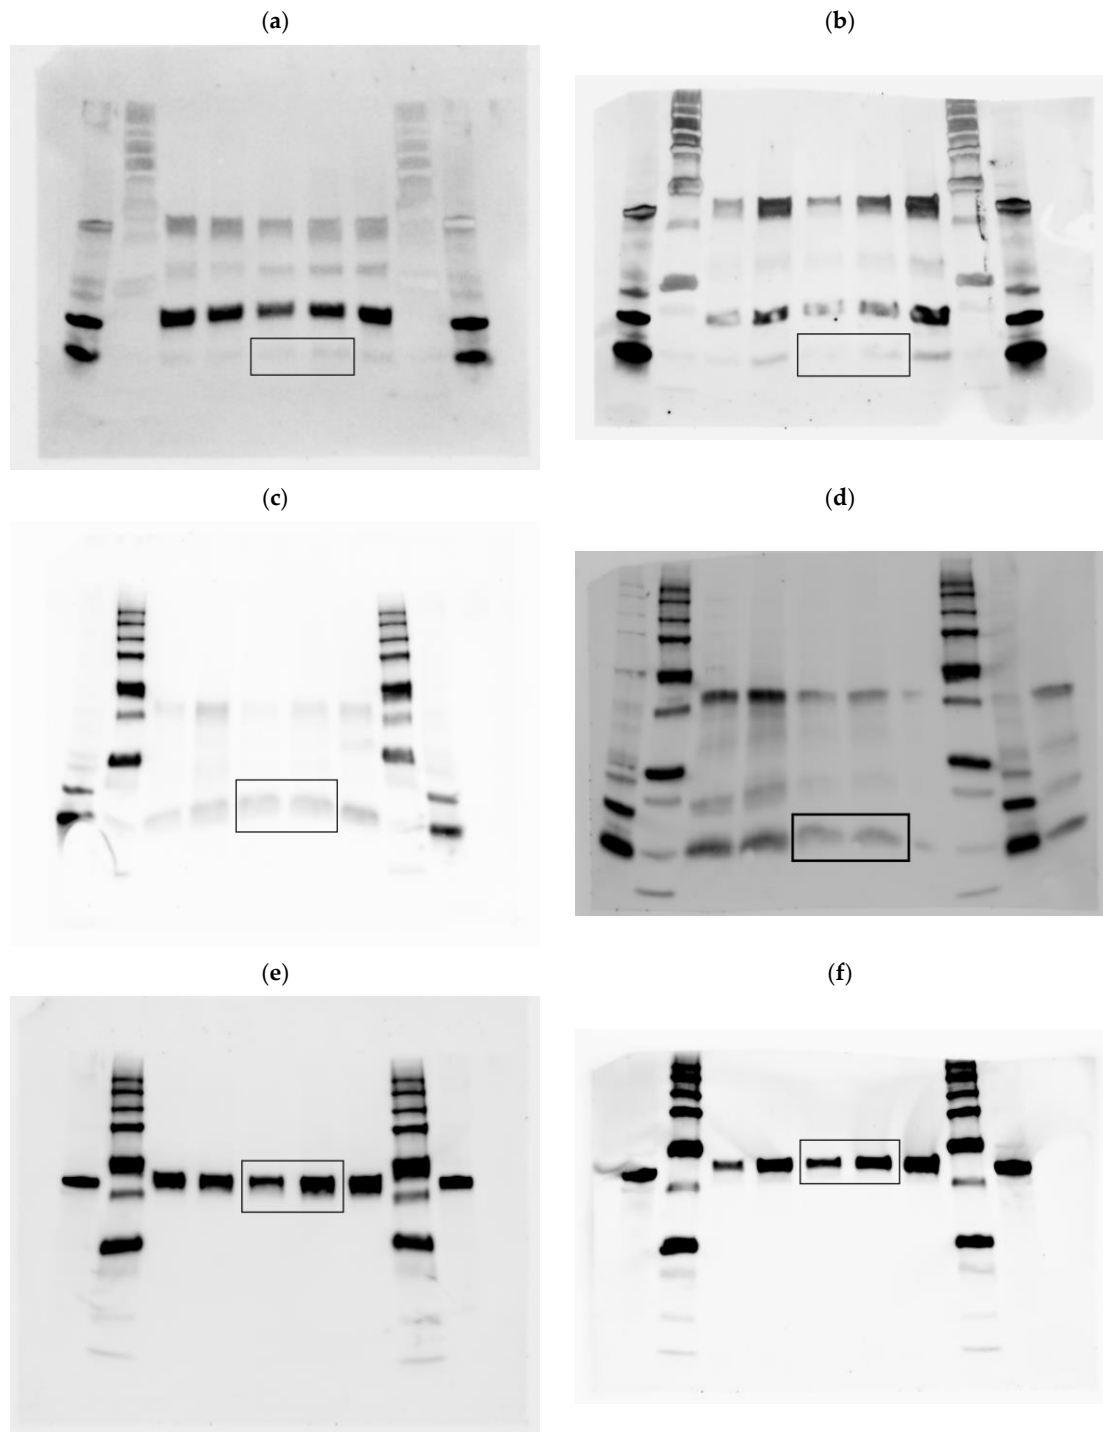

**Figure S3.** Expression of cytochrome *c* and  $\beta$ -Actin in HBL-100 and HBL-100/Dox cells after **MK**-treatment for 16 h. Black squares indicate lines used in this study:

(a) WB of cytosolic fraction of the HBL-100 cell lysates after **MK**-treatment for 16 h with 1.0  $\mu$ M: line 1, 3, 4, 7, 9 – inapplicable in this research, lines 2, 8 - MW, line 5 – control, line 6 - **MK**-treatment with 1.0  $\mu$ M. Staining with primary AT of cytochrome *c* (18 kDa)

(b) WB of cytosolic fraction of the HBL-100/Dox cell lysates after **MK**-treatment for 16 h with 1.8  $\mu$ M: line 1, 3, 4, 7, 9 – inapplicable in this research, lines 2, 8 - MW, line 5 – control, line 6 - **MK**-treatment with 1.0  $\mu$ M. Staining with primary AT of cytochrome *c* (18 kDa)

(c) WB of mitochondrial fraction of the HBL-100 cell lysates after **MK**-treatment for 16 h with 1.0  $\mu$ M: line 1, 3, 4, 7, 9 – inapplicable in this research, lines 2, 8 - MW, line 5 – control, line 6 - **MK**-treatment with 1.0  $\mu$ M. Staining with primary AT of cytochrome *c* (18 kDa)

(d) WB of mitochondrial fraction of the HBL-100/Dox cell lysates after **MK**-treatment for 16 h with 1.8  $\mu$ M: line 1, 3, 4, 7, 9 – inapplicable in this research, lines 2, 8 – MW, line 5 – control, line 6 – **MK**-treatment with 1.8  $\mu$ M. Staining with primary AT of cytochrome *c* (18 kDa)

(e) WB of cytosolic fraction of the HBL-100 cell lysates after **MK**-treatment for 16 h with 1.0  $\mu$ M: line 1, 3, 4, 7, 9 – inapplicable in this research, lines 2, 8 – MW, line 5 – control, line 6 – **MK**-treatment with 1.0  $\mu$ M. Staining with primary AT of  $\beta$ -Actin (45 kDa)

(f) WB of cytosolic fraction of the HBL-100/Dox cell lysates after **MK**-treatment for 16 h with 1.8  $\mu$ M: line 1, 3, 4, 7, 9 – inapplicable in this research, lines 2, 8 – MW, line 5 – control, line 6 – **MK**-treatment with 1.0  $\mu$ M. Staining with primary AT of  $\beta$ -Actin (45 kDa)

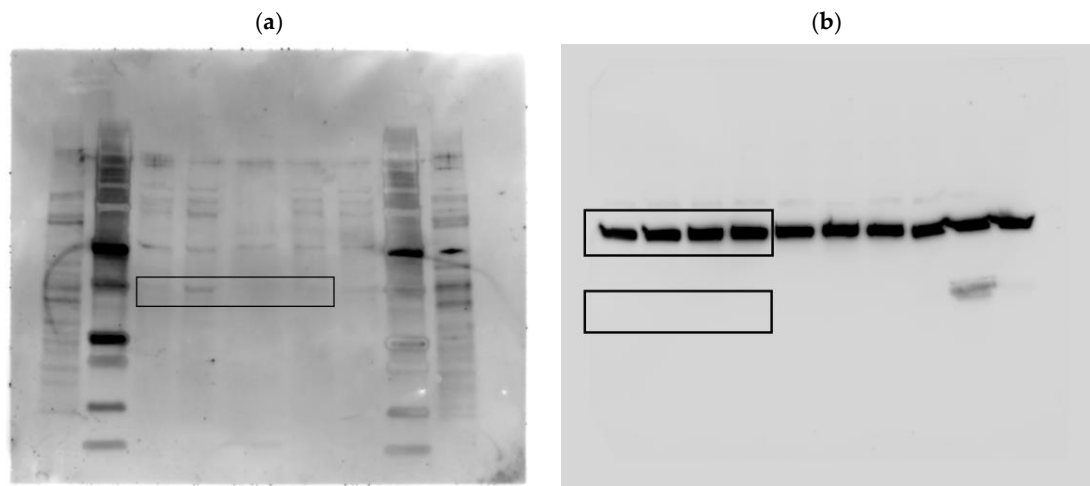

**Figure S4.** Expression of caspase-9, -8 and  $\beta$ -Actin in HBL-100 and HBL-100/Dox cells after **MK**-treatment for 16 h. Black squares indicate lines used in this study:

(a) WB of cytosolic fraction of the HBL-100 and HBL-100/Dox cell lysates after **MK**-treatment for 16 h with 1.0 and 1.8  $\mu$ M, respectively: line 1, 7, 9 – inapplicable in this research, lines 2, 8 – MW, line 3 – untreated HBL-100/Dox cells, line 4 – **MK**-treated HBL-100/Dox cells, line 5 – untreated HBL-100 cells, line 6 – **MK**-treated HBL-100 cells. Staining with primary AT of caspase 9 (37 kDa)

(a) WB of cytosolic fraction of the HBL-100 and HBL-100/Dox cell lysates after **MK**-treatment for 16 h with 1.0 and 1.8  $\mu$ M, respectively: lines from 5 to 10 – inapplicable in this research, line 1 – untreated HBL-100 cells, line 2 – **MK**-treated HBL-100 cells, line 3 – untreated HBL-100/Dox cells, line 4 – **MK**-treated HBL-100/Dox cells. Staining with primary AT of caspase 8 (18 kDa) and  $\beta$ -Actin (45 kDa)

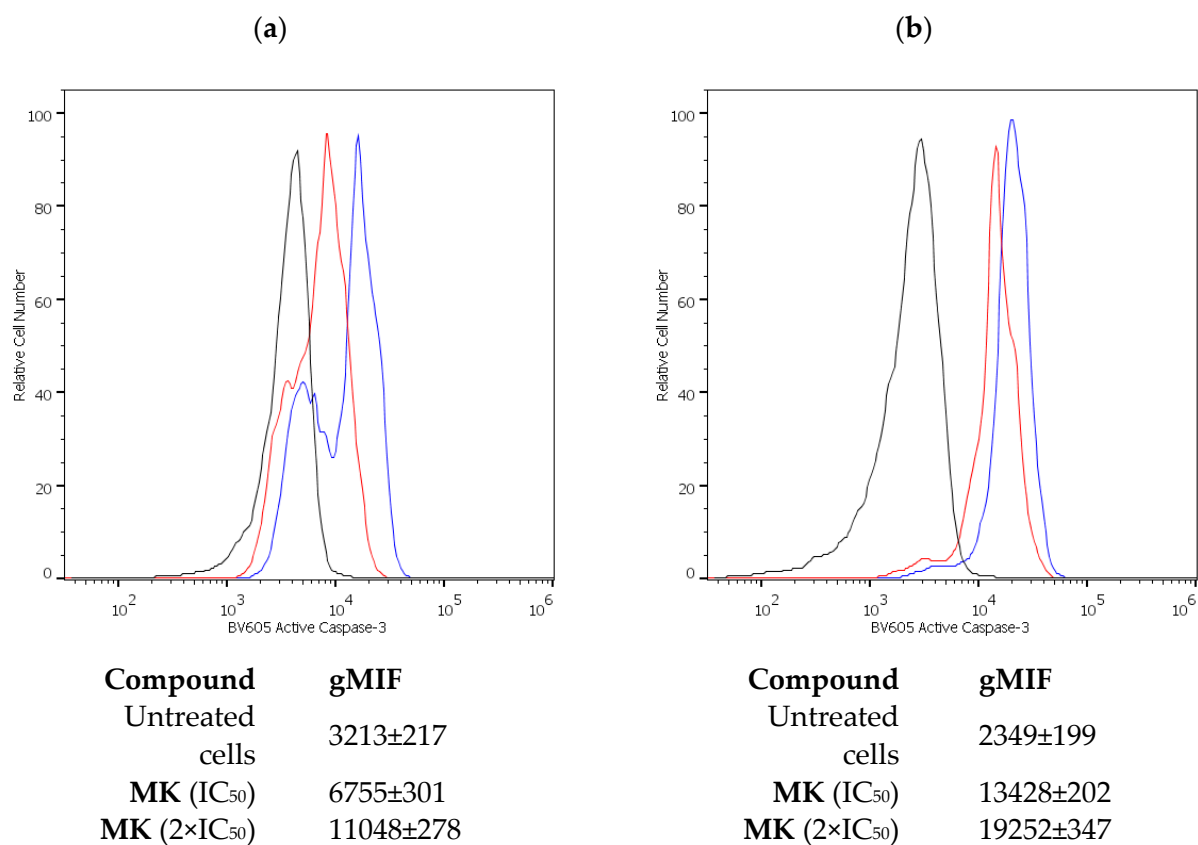

**Figure S5.** Flow cytometric analysis of Active Caspase-3 expressed by apoptotic HBL-100 (a) and HBL-100/Dox (b) cells. Cells were untreated (black line histogram) or MK-treated (IC<sub>50</sub> – red line histogram, 2×IC<sub>50</sub> – blue line histogram) for 24 h to induce apoptosis.
